# Supplementary material for: Environmentally friendly Nafion-catalyzed synthesis of 3-substituted isoquinoline by using hexamethyldisilazane as a nitrogen source under microwave irradiation
Source: Royal Society of Chemistry journal article supplement (doi:10.1039/d3ob01032e), 2023-01-01
Supplement: d3ob01032e1.pdf [file d3ob01032e1.pdf]

# Supporting Information

## Environmentally friendly Nafion-catalyzed synthesis of 3-substituted Isoquinoline by using hexamethyldisilazane as a nitrogen source under microwave irradiation

Tzu-Chun Lin, Chieh-Kai Chan,\* Yi-Hsiu Chung and Cheng-Chung Wang\*

<sup>a</sup>Institute of Chemistry, Academia Sinica, Taipei 115, Taiwan

E-mail: ckc@gate.sinica.edu.tw and wangcc7280@gate.sinica.edu.tw

|                                                                                                             |             |
|-------------------------------------------------------------------------------------------------------------|-------------|
| I. Table of Compound Structures and Corresponding Page Numbers.....                                         | S-2~S-3     |
| II. Crystal data for compounds <b>1b</b> , <b>1c</b> and <b>1e</b> .....                                    | S-4~S-6     |
| III. Scanned photocopies of <sup>1</sup> H and <sup>13</sup> C NMR spectra for compounds <b>2a-2x</b> ..... | S-7~S-54    |
| VI. Scanned photocopies of <sup>1</sup> H and <sup>13</sup> C NMR spectra for compounds <b>1a-1x</b> .....  | S-55~S-102  |
| V. Scanned high-resolution mass spectra (HRMS) for compounds <b>2a-2x</b> .....                             | S-102~S-125 |
| IV. Scanned high-resolution mass spectra (HRMS) for compounds <b>1a-1x</b> .....                            | S-126~S-149 |

|                                                                                                                                                    |                                                                                                                                                    |                                                                                                                                                    |                                                                                                                                                     |                                                                                                                                                      |
|----------------------------------------------------------------------------------------------------------------------------------------------------|----------------------------------------------------------------------------------------------------------------------------------------------------|----------------------------------------------------------------------------------------------------------------------------------------------------|-----------------------------------------------------------------------------------------------------------------------------------------------------|------------------------------------------------------------------------------------------------------------------------------------------------------|
| <p><b>Compound 2a</b><br/>NMR (S-7~S-8)<br/>HRMS (S-102)</p> 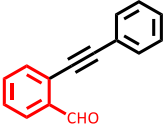     | <p><b>Compound 2b</b><br/>NMR (S-9~S-10)<br/>HRMS (S-103)</p>     | <p><b>Compound 2c</b><br/>NMR (S-11~S-12)<br/>HRMS (S-104)</p>    | <p><b>Compound 2d</b><br/>NMR (S-13~S-14)<br/>HRMS (S-105)</p>    | <p><b>Compound 2e</b><br/>NMR (S-15~S-16)<br/>HRMS (S-106)</p>    |
| <p><b>Compound 2f</b><br/>NMR (S-17~S-18)<br/>HRMS (S-107)</p>    | <p><b>Compound 2g</b><br/>NMR (S-19~S-20)<br/>HRMS (S-108)</p>    | <p><b>Compound 2h</b><br/>NMR (S-21~S-22)<br/>HRMS (S-109)</p>    | <p><b>Compound 2i</b><br/>NMR (S-23~S-24)<br/>HRMS (S-110)</p>    | <p><b>Compound 2j</b><br/>NMR (S-25~S-26)<br/>HRMS (S-111)</p>    |
| <p><b>Compound 2k</b><br/>NMR (S-27~S-28)<br/>HRMS (S-112)</p>   | <p><b>Compound 2l</b><br/>NMR (S-29~S-30)<br/>HRMS (S-113)</p>   | <p><b>Compound 2m</b><br/>NMR (S-31~S-32)<br/>HRMS (S-114)</p>   | <p><b>Compound 2n</b><br/>NMR (S-33~S-34)<br/>HRMS (S-115)</p>   | <p><b>Compound 2o</b><br/>NMR (S-35~S-36)<br/>HRMS (S-116)</p>   |
| <p><b>Compound 2p</b><br/>NMR (S-37~S-38)<br/>HRMS (S-117)</p>  | <p><b>Compound 2q</b><br/>NMR (S-39~S-40)<br/>HRMS (S-118)</p>  | <p><b>Compound 2r</b><br/>NMR (S-41~S-42)<br/>HRMS (S-119)</p>  | <p><b>Compound 2s</b><br/>NMR (S-43~S-44)<br/>HRMS (S-120)</p>  | <p><b>Compound 2t</b><br/>NMR (S-45~S-46)<br/>HRMS (S-121)</p>  |
| <p><b>Compound 2u</b><br/>NMR (S-47~S-48)<br/>HRMS (S-122)</p>  | <p><b>Compound 2v</b><br/>NMR (S-49~S-50)<br/>HRMS (S-123)</p>  | <p><b>Compound 2w</b><br/>NMR (S-51~S-52)<br/>HRMS (S-124)</p>  | <p><b>Compound 2x</b><br/>NMR (S-53~S-54)<br/>HRMS (S-125)</p>  |                                                                                                                                                      |

|                                                                                     |                                                                                     |                                                                                     |                                                                                      |                                                                                       |
|-------------------------------------------------------------------------------------|-------------------------------------------------------------------------------------|-------------------------------------------------------------------------------------|--------------------------------------------------------------------------------------|---------------------------------------------------------------------------------------|
| <u>Compound 1a</u><br>NMR (S-55~S-56)<br>HRMS (S-126)                               | <u>Compound 1b</u><br>NMR (S-57~S-58)<br>HRMS (S-127)                               | <u>Compound 1c</u><br>NMR (S-59~S-60)<br>HRMS (S-128)                               | <u>Compound 1d</u><br>NMR (S-61~S-62)<br>HRMS (S-129)                                | <u>Compound 1e</u><br>NMR (S-63~S-64)<br>HRMS (S-130)                                 |
| 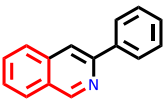   |    |    |    |    |
| <u>Compound 1f</u><br>NMR (S-65~S-66)<br>HRMS (S-131)                               | <u>Compound 1g</u><br>NMR (S-67~S-68)<br>HRMS (S-132)                               | <u>Compound 1h</u><br>NMR (S-69~S-70)<br>HRMS (S-133)                               | <u>Compound 1i</u><br>NMR (S-71~S-72)<br>HRMS (S-134)                                | <u>Compound 1j</u><br>NMR (S-73~S-74)<br>HRMS (S-135)                                 |
|    |    |    |    |    |
| <u>Compound 1k</u><br>NMR (S-75~S-76)<br>HRMS (S-136)                               | <u>Compound 1l</u><br>NMR (S-77~S-78)<br>HRMS (S-137)                               | <u>Compound 1m</u><br>NMR (S-79~S-80)<br>HRMS (S-138)                               | <u>Compound 1n</u><br>NMR (S-81~S-82)<br>HRMS (S-139)                                | <u>Compound 1o</u><br>NMR (S-83~S-84)<br>HRMS (S-140)                                 |
|   |   |   |   |   |
| <u>Compound 1p</u><br>NMR (S-85~S-86)<br>HRMS (S-141)                               | <u>Compound 1q</u><br>NMR (S-87~S-88)<br>HRMS (S-142)                               | <u>Compound 1r</u><br>NMR (S-89~S-90)<br>HRMS (S-143)                               | <u>Compound 1s</u><br>NMR (S-91~S-92)<br>HRMS (S-144)                                | <u>Compound 1t</u><br>NMR (S-93~S-94)<br>HRMS (S-145)                                 |
|  |  |  |  |  |
| <u>Compound 1u</u><br>NMR (S-95~S-96)<br>HRMS (S-146)                               | <u>Compound 1v</u><br>NMR (S-97~S-98)<br>HRMS (S-147)                               | <u>Compound 1w</u><br>NMR (S-99~S-100)<br>HRMS (S-148)                              | <u>Compound 1x</u><br>NMR (S-101~S-102)<br>HRMS (S-149)                              |                                                                                       |
|  |  |  |  |                                                                                       |

Crystal data and structure refinement for compound **1b**  
(the thermal ellipsoid was drawn at the 50% probability level)

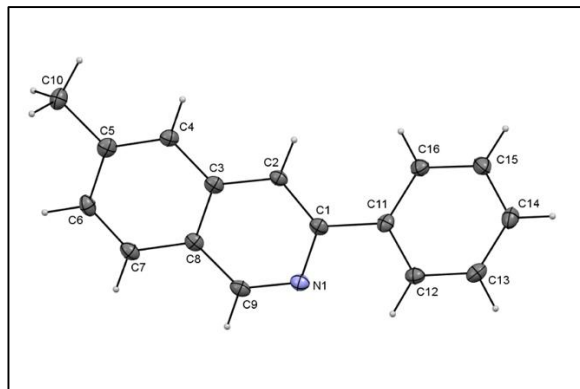

|                                   |                                             |                    |
|-----------------------------------|---------------------------------------------|--------------------|
| Identification code               | i18487                                      |                    |
| Empirical formula                 | C <sub>16</sub> H <sub>13</sub> N           |                    |
| Formula weight                    | 219.27                                      |                    |
| Temperature                       | 100.0(2) K                                  |                    |
| Wavelength                        | 1.54178 Å                                   |                    |
| Crystal system                    | Monoclinic                                  |                    |
| Space group                       | P 21                                        |                    |
| Unit cell dimensions              | a = 6.07430(10) Å                           | α = 90°.           |
|                                   | b = 7.29170(10) Å                           | β = 100.6020(10)°. |
|                                   | c = 12.6835(2) Å                            | γ = 90°.           |
| Volume                            | 552.187(15) Å <sup>3</sup>                  |                    |
| Z, Density (calculated)           | 2, 1.319 Mg/m <sup>3</sup>                  |                    |
| Absorption coefficient            | 0.587 mm <sup>-1</sup>                      |                    |
| F(000)                            | 232                                         |                    |
| Crystal size                      | 0.200 x 0.180 x 0.165 mm <sup>3</sup>       |                    |
| Theta range for data collection   | 3.545 to 72.608°.                           |                    |
| Index ranges                      | -7 ≤ h ≤ 7, -8 ≤ k ≤ 9, -15 ≤ l ≤ 15        |                    |
| Reflections collected             | 8632                                        |                    |
| Independent reflections           | 2104 [R(int) = 0.0347]                      |                    |
| Completeness to theta = 67.679°   | 99.7 %                                      |                    |
| Absorption correction             | Numerical                                   |                    |
| Max. and min. transmission        | 1 and 0.8369                                |                    |
| Refinement method                 | Full-matrix least-squares on F <sup>2</sup> |                    |
| Data / restraints / parameters    | 2104 / 1 / 155                              |                    |
| Goodness-of-fit on F <sup>2</sup> | 1.090                                       |                    |
| Final R indices [I > 2σ(I)]       | R1 = 0.0292, wR2 = 0.0800                   |                    |
| R indices (all data)              | R1 = 0.0294, wR2 = 0.0801                   |                    |
| Absolute structure parameter      | 0.03(16)                                    |                    |
| Extinction coefficient            | n/a                                         |                    |
| Largest diff. peak and hole       | 0.177 and -0.183 e.Å <sup>-3</sup>          |                    |



Crystal data and structure refinement for compound **1c**  
(the thermal ellipsoid was drawn at the 50% probability level)

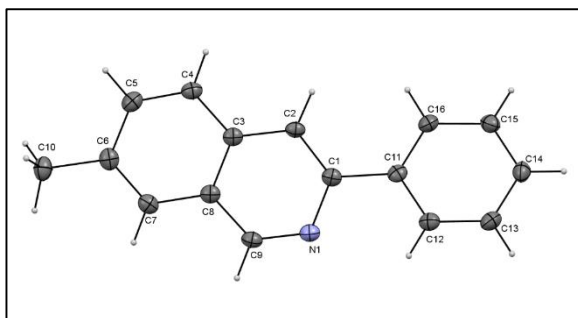

|                                   |                                             |          |
|-----------------------------------|---------------------------------------------|----------|
| Identification code               | i18488                                      |          |
| Empirical formula                 | C <sub>16</sub> H <sub>13</sub> N           |          |
| Formula weight                    | 219.27                                      |          |
| Temperature                       | 100.0(2) K                                  |          |
| Wavelength                        | 1.54178 Å                                   |          |
| Crystal system                    | Orthorhombic                                |          |
| Space group                       | P 21 21 21                                  |          |
| Unit cell dimensions              | a = 6.14730(10) Å                           | α = 90°. |
|                                   | b = 7.40040(10) Å                           | β = 90°. |
|                                   | c = 24.6690(3) Å                            | γ = 90°. |
| Volume                            | 1122.25(3) Å <sup>3</sup>                   |          |
| Z, Density (calculated)           | 4, 1.298 Mg/m <sup>3</sup>                  |          |
| Absorption coefficient            | 0.577 mm <sup>-1</sup>                      |          |
| F(000)                            | 464                                         |          |
| Crystal size                      | 0.153 x 0.125 x 0.095 mm <sup>3</sup>       |          |
| Theta range for data collection   | 3.583 to 72.572°.                           |          |
| Index ranges                      | -7 ≤ h ≤ 6, -9 ≤ k ≤ 9, -29 ≤ l ≤ 30        |          |
| Reflections collected             | 23354                                       |          |
| Independent reflections           | 2211 [R(int) = 0.0449]                      |          |
| Completeness to theta = 67.679°   | 100.0 %                                     |          |
| Absorption correction             | Numerical                                   |          |
| Max. and min. transmission        | 1 and 0.8162                                |          |
| Refinement method                 | Full-matrix least-squares on F <sup>2</sup> |          |
| Data / restraints / parameters    | 2211 / 0 / 155                              |          |
| Goodness-of-fit on F <sup>2</sup> | 1.040                                       |          |
| Final R indices [I > 2σ(I)]       | R1 = 0.0260, wR2 = 0.0664                   |          |
| R indices (all data)              | R1 = 0.0266, wR2 = 0.0666                   |          |
| Absolute structure parameter      | 0.00(14)                                    |          |
| Extinction coefficient            | n/a                                         |          |
| Largest diff. peak and hole       | 0.144 and -0.182 e.Å <sup>-3</sup>          |          |

Crystal data and structure refinement for compound **1e**  
(the thermal ellipsoid was drawn at the 50% probability level)

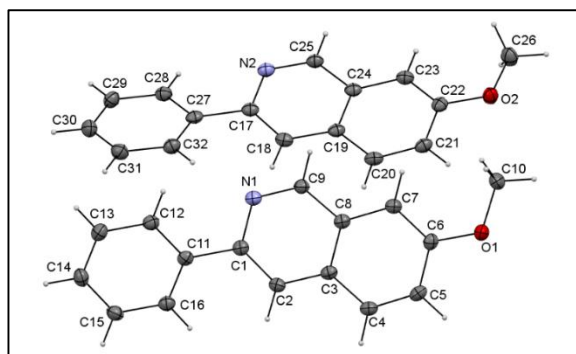

|                                   |                                             |                   |
|-----------------------------------|---------------------------------------------|-------------------|
| Identification code               | i18491                                      |                   |
| Empirical formula                 | C <sub>16</sub> H <sub>13</sub> N O         |                   |
| Formula weight                    | 235.27                                      |                   |
| Temperature                       | 100.0(2) K                                  |                   |
| Wavelength                        | 1.54178 Å                                   |                   |
| Crystal system                    | Monoclinic                                  |                   |
| Space group                       | P 21/c                                      |                   |
| Unit cell dimensions              | a = 12.0705(2) Å                            | α = 90°.          |
|                                   | b = 7.47590(10) Å                           | β = 97.4090(10)°. |
|                                   | c = 26.1572(4) Å                            | γ = 90°.          |
| Volume                            | 2340.66(6) Å <sup>3</sup>                   |                   |
| Z, Density (calculated)           | 8, 1.335 Mg/m <sup>3</sup>                  |                   |
| Absorption coefficient            | 0.658 mm <sup>-1</sup>                      |                   |
| F(000)                            | 992                                         |                   |
| Crystal size                      | 0.120 x 0.101 x 0.094 mm <sup>3</sup>       |                   |
| Theta range for data collection   | 3.408 to 72.548°.                           |                   |
| Index ranges                      | -14 ≤ h ≤ 14, -8 ≤ k ≤ 9, -32 ≤ l ≤ 31      |                   |
| Reflections collected             | 56392                                       |                   |
| Independent reflections           | 4631 [R(int) = 0.0907]                      |                   |
| Completeness to theta = 67.679°   | 99.9 %                                      |                   |
| Absorption correction             | Numerical                                   |                   |
| Max. and min. transmission        | 1 and 0.8211                                |                   |
| Refinement method                 | Full-matrix least-squares on F <sup>2</sup> |                   |
| Data / restraints / parameters    | 4631 / 0 / 327                              |                   |
| Goodness-of-fit on F <sup>2</sup> | 1.059                                       |                   |
| Final R indices [I > 2σ(I)]       | R1 = 0.0473, wR2 = 0.1201                   |                   |
| R indices (all data)              | R1 = 0.0833, wR2 = 0.1289                   |                   |
| Extinction coefficient            | n/a                                         |                   |
| Largest diff. peak and hole       | 0.412 and -0.194 e.Å <sup>-3</sup>          |                   |

# The $^1\text{H}$ NMR spectrum in $\text{CDCl}_3$ of compound 2a

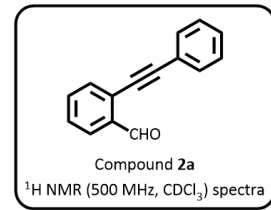

1H CYL-706 sep 46 0720

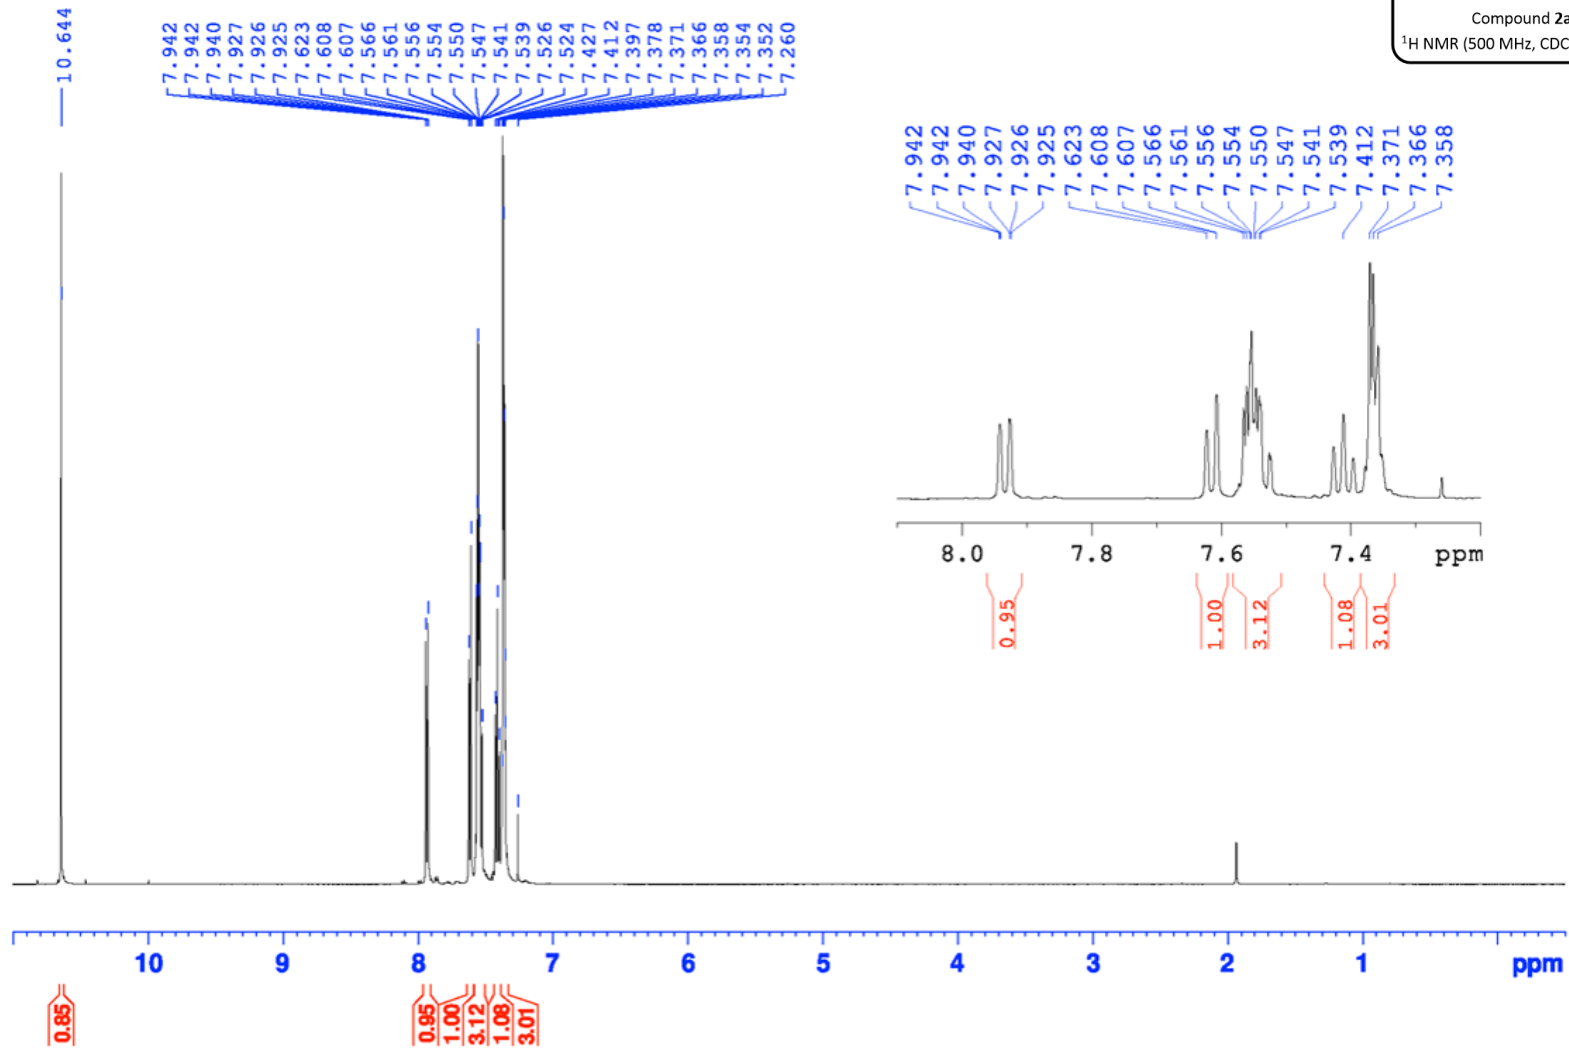

# The $^{13}\text{C}$ NMR spectrum in $\text{CDCl}_3$ of compound 2a

13C CYL-706 sep 46 0720

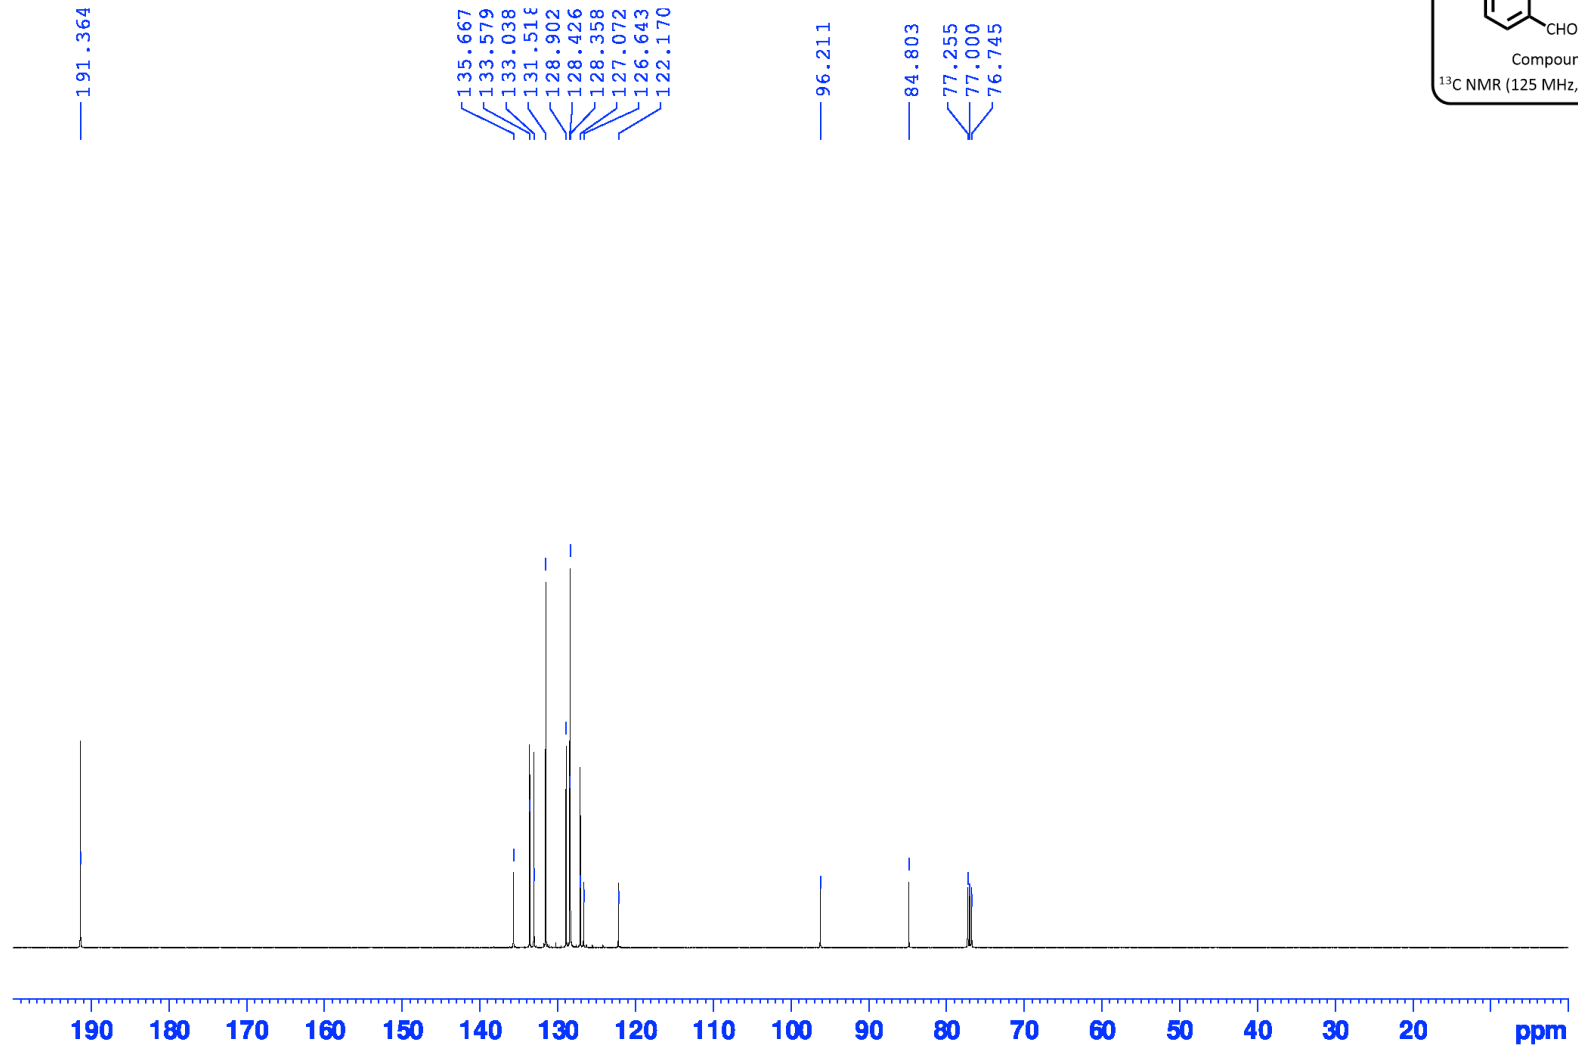

# The $^1\text{H}$ NMR spectrum in $\text{CDCl}_3$ of compound 2b

1H CYL-707 sep 61-62 0729

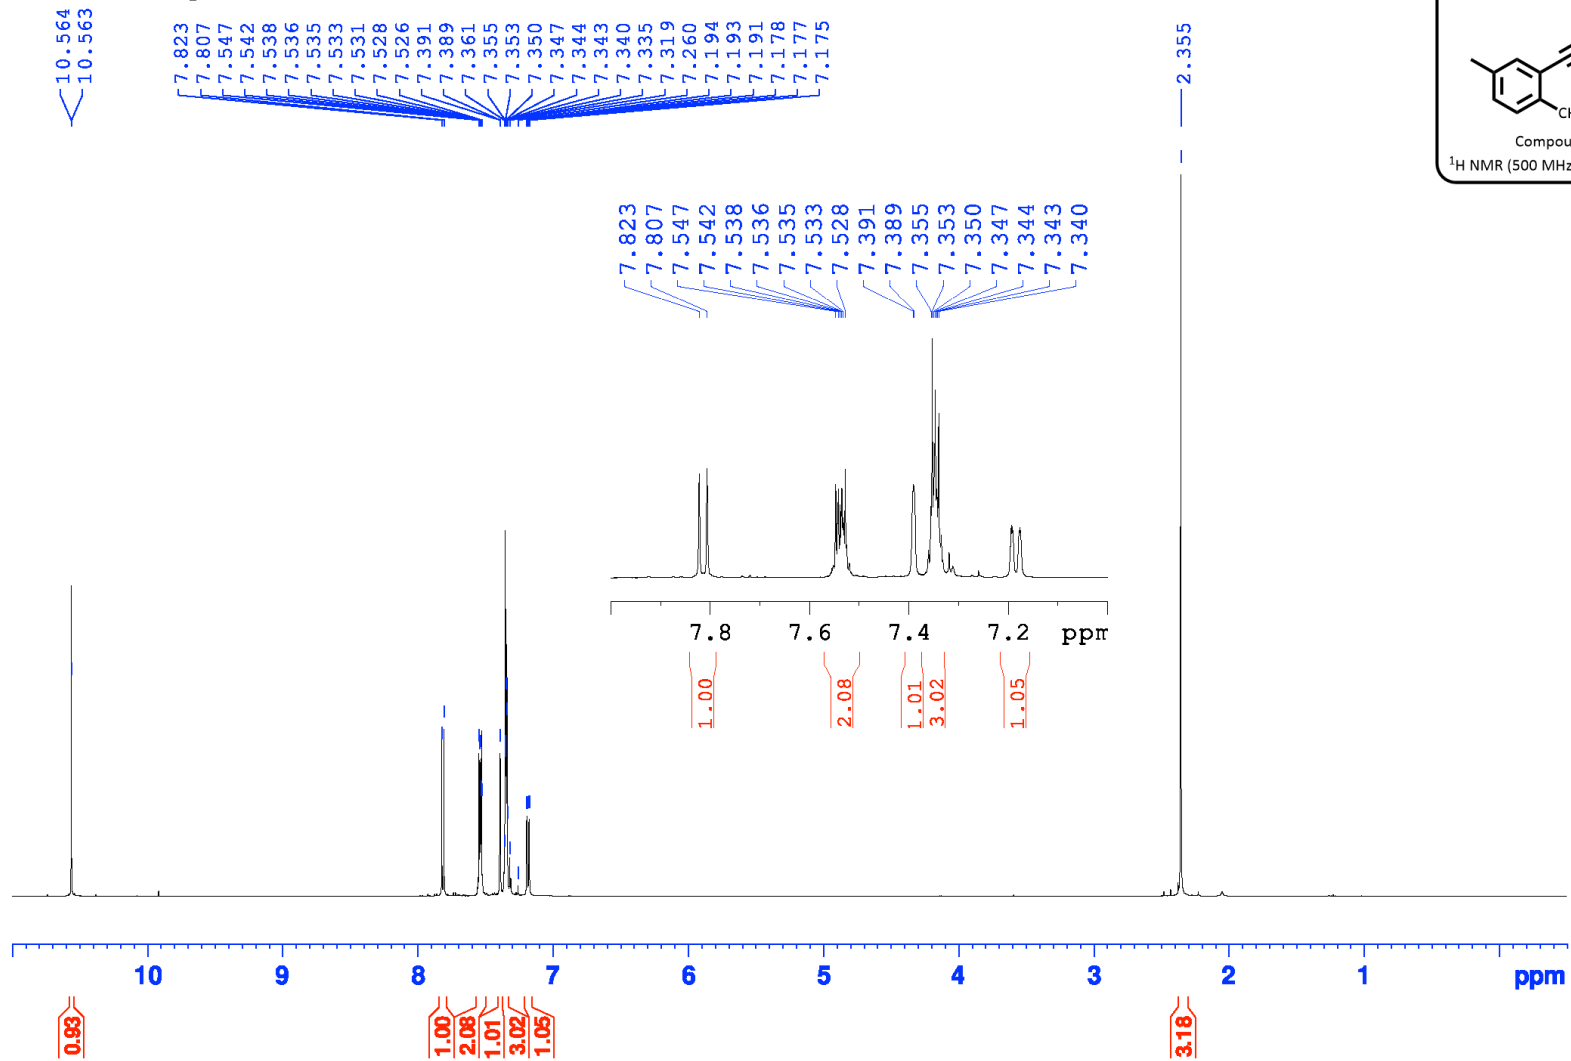

# The $^{13}\text{C}$ NMR spectrum in $\text{CDCl}_3$ of compound 2b

13C CYL-707 sep 61-62 0729

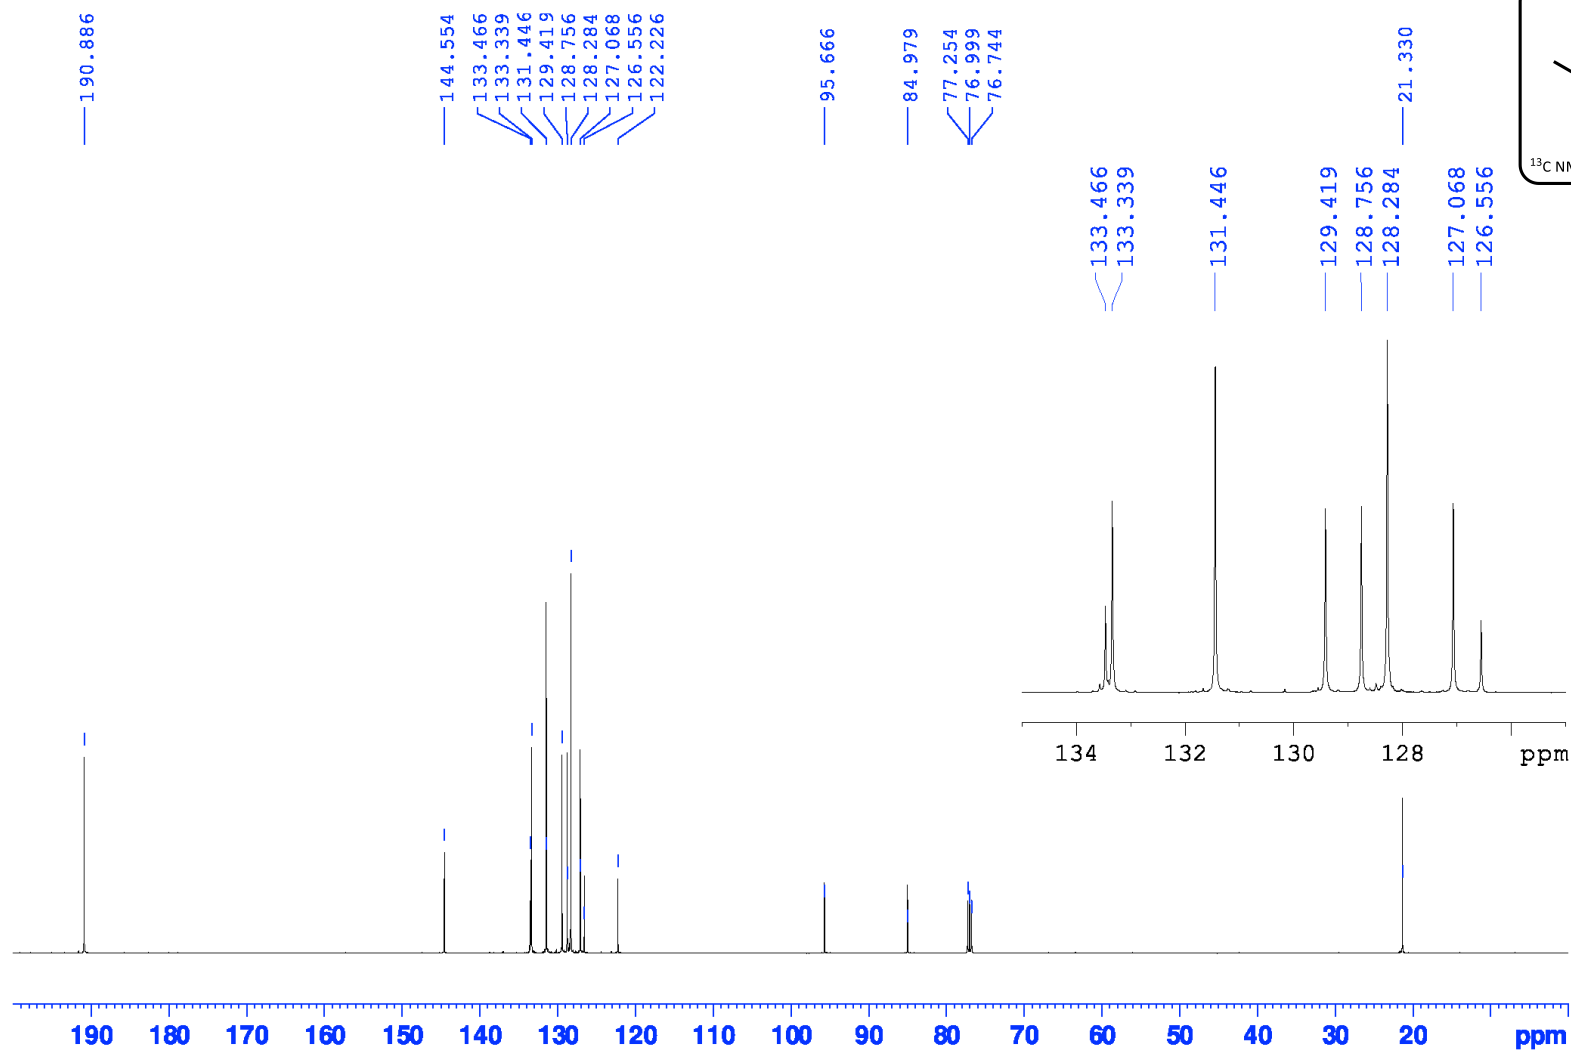

# The $^1\text{H}$ NMR spectrum in $\text{CDCl}_3$ of compound 2c

1H CYL-708 sep 5051 0730

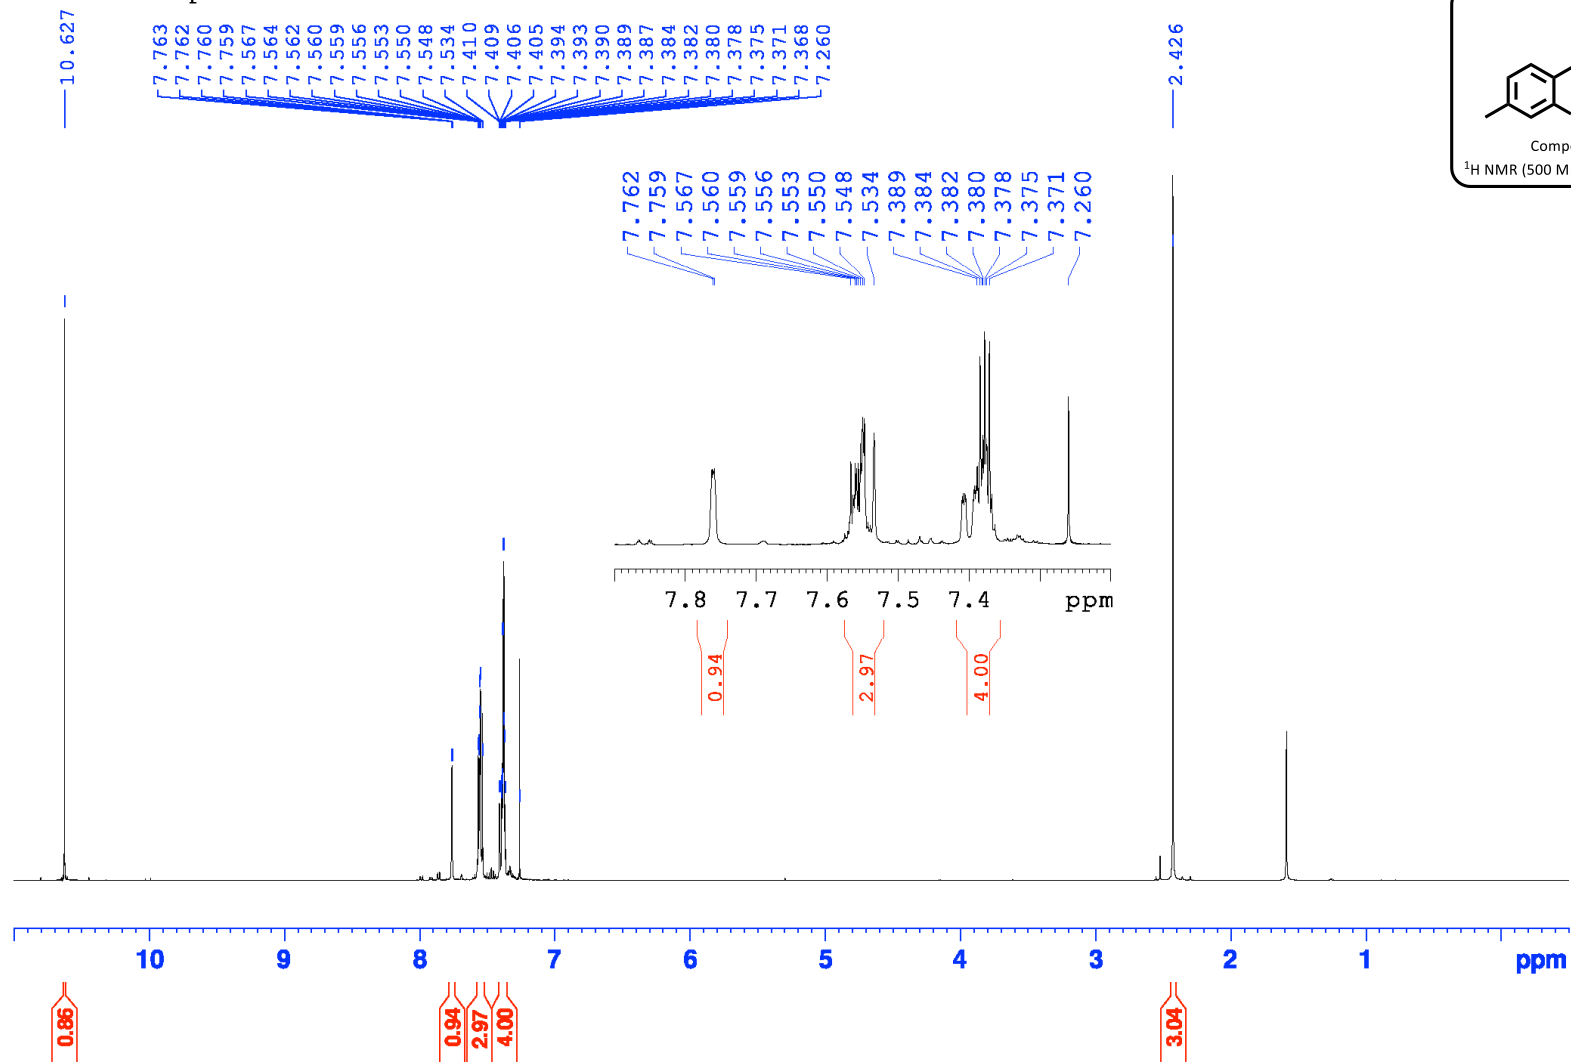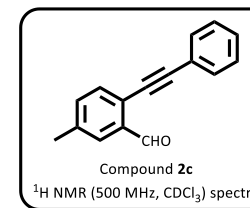

# The $^{13}\text{C}$ NMR spectrum in $\text{CDCl}_3$ of compound 2c

13C CYL-708 sep 5051 0730

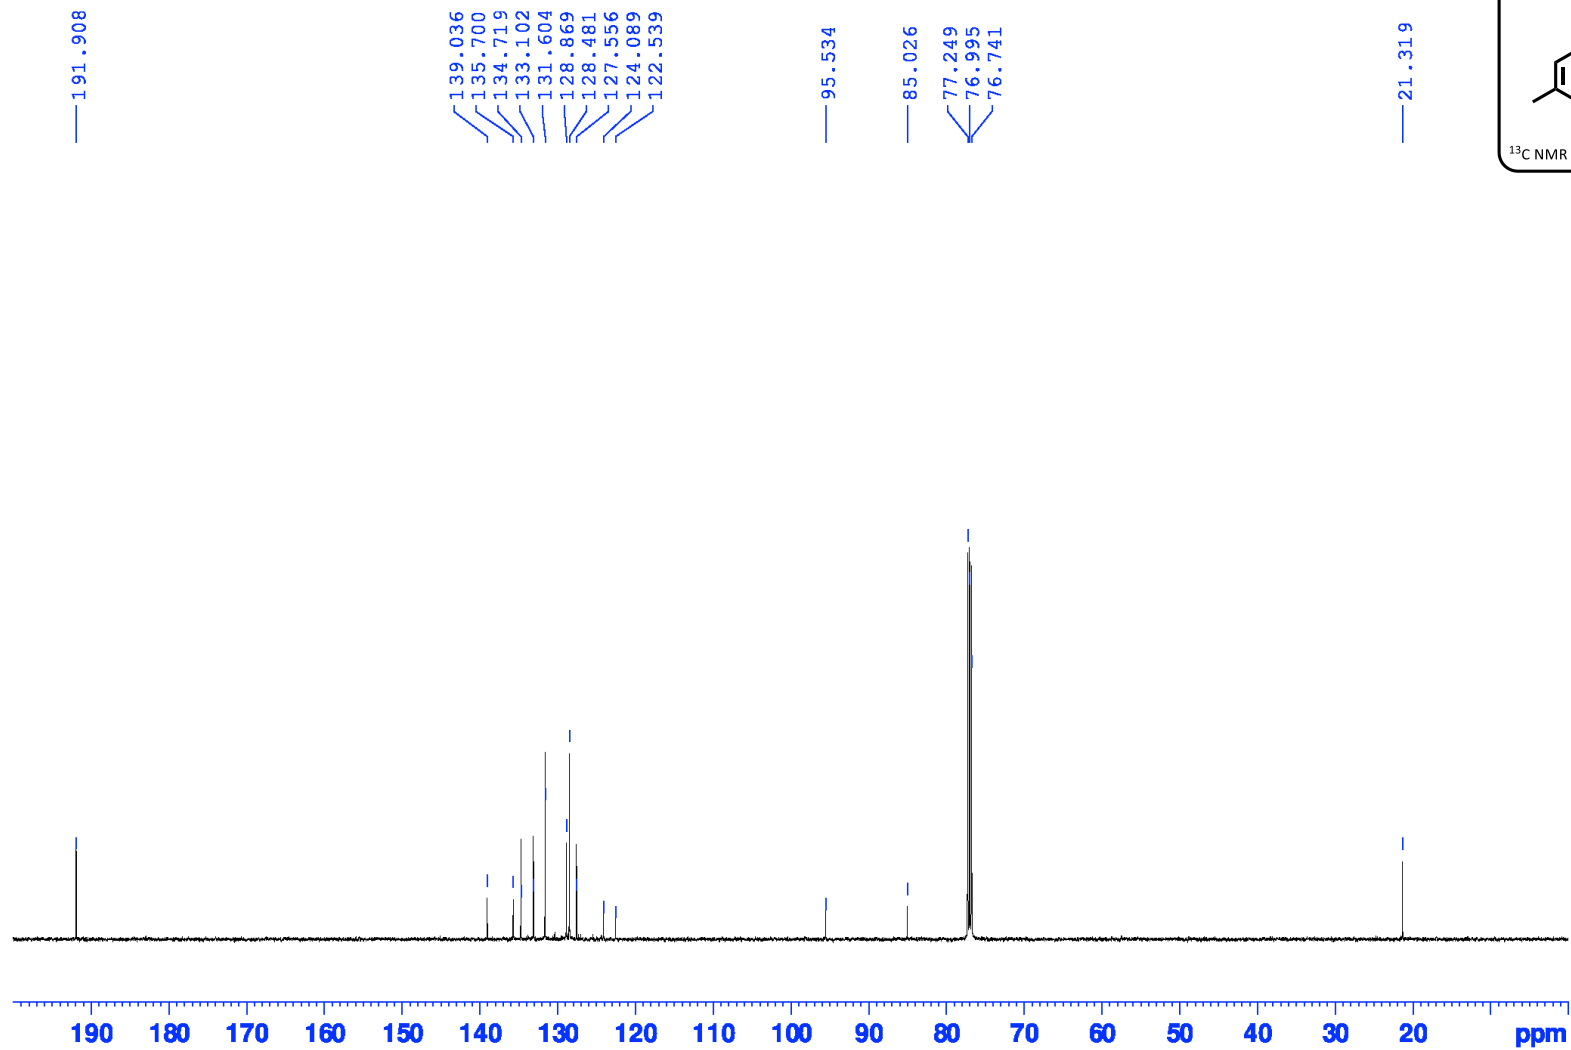



# The $^1\text{H}$ NMR spectrum in $\text{CDCl}_3$ of compound 2d

$^1\text{H}$  CYL-709 sep 49-51 0810

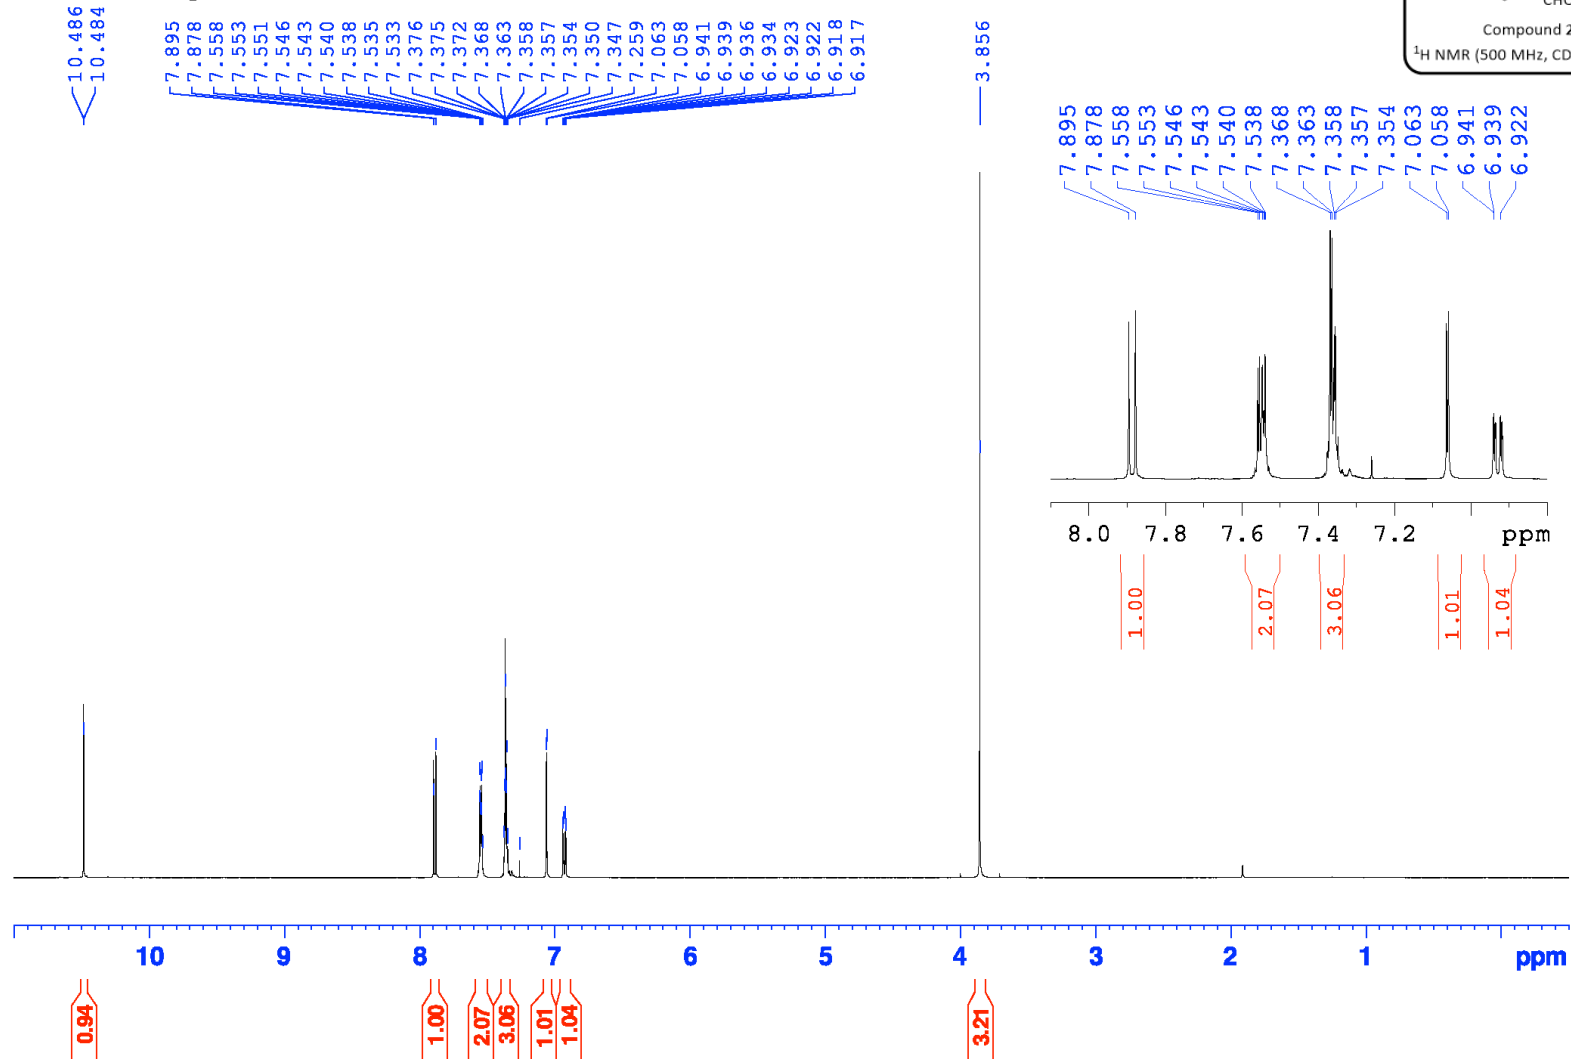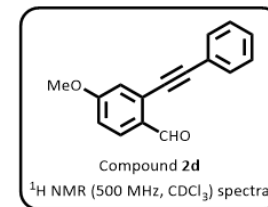

# The $^{13}\text{C}$ NMR spectrum in $\text{CDCl}_3$ of compound 2d

13C CYL-709 sep 49-51 0810

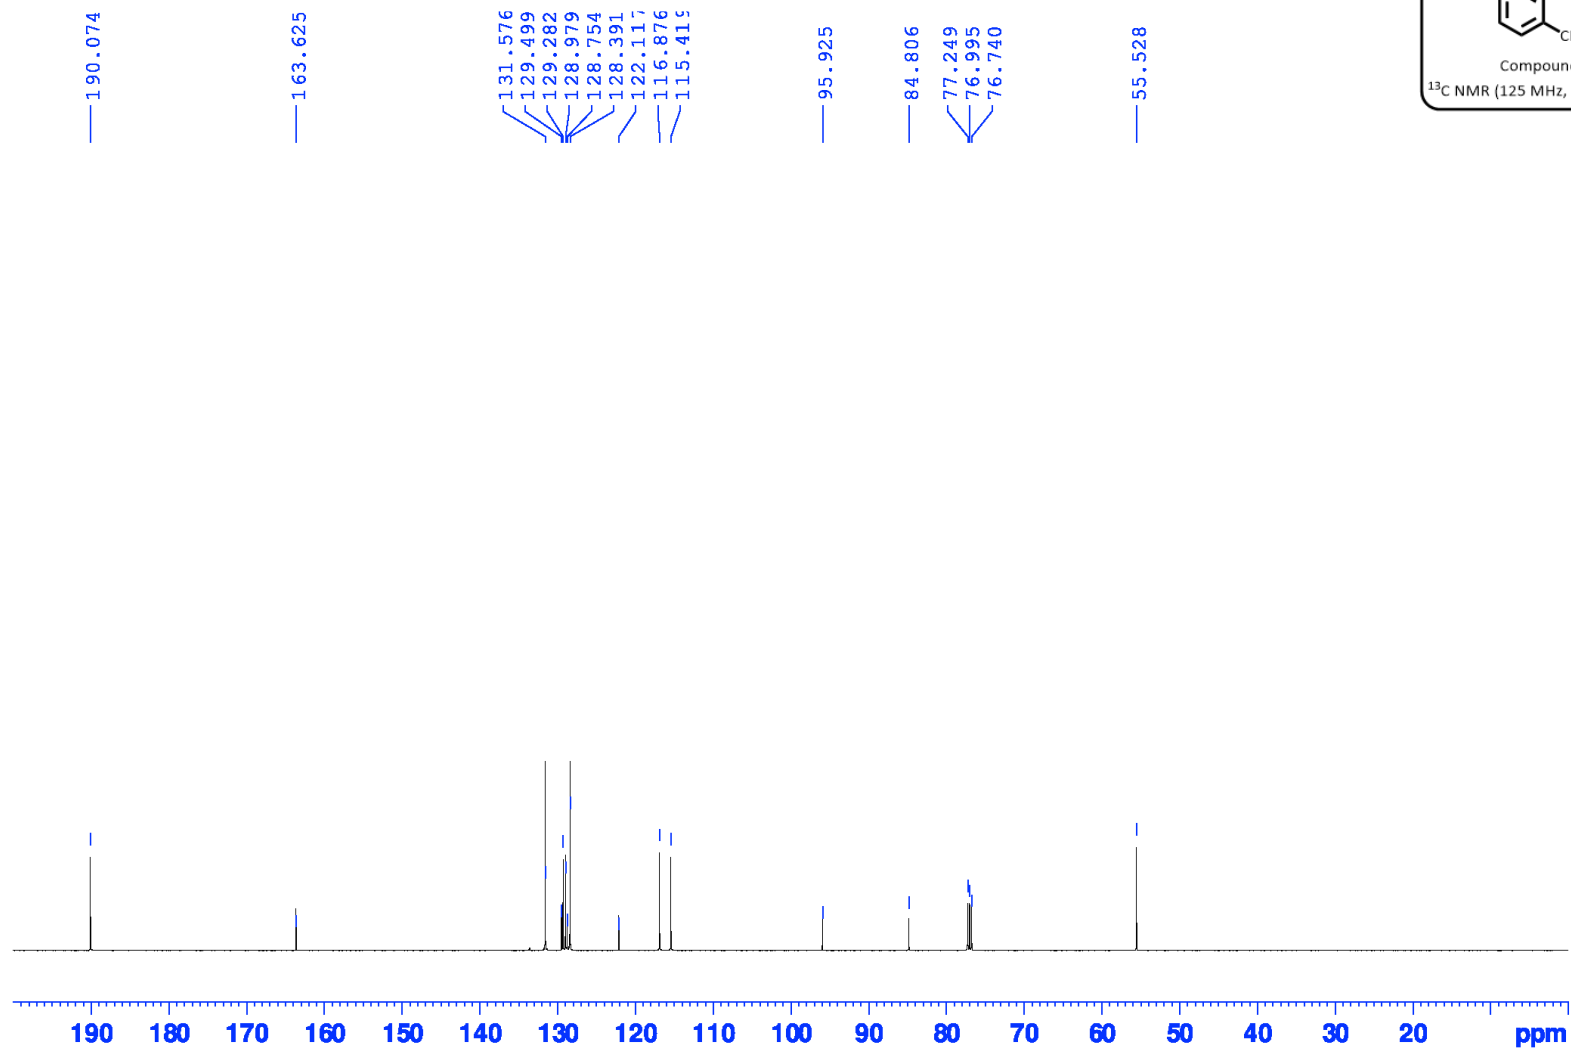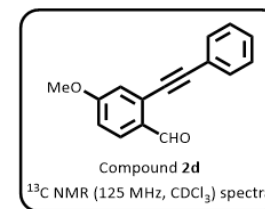

# The $^1\text{H}$ NMR spectrum in $\text{CDCl}_3$ of compound 2e.

1H CYL-710 sep 3334 0811

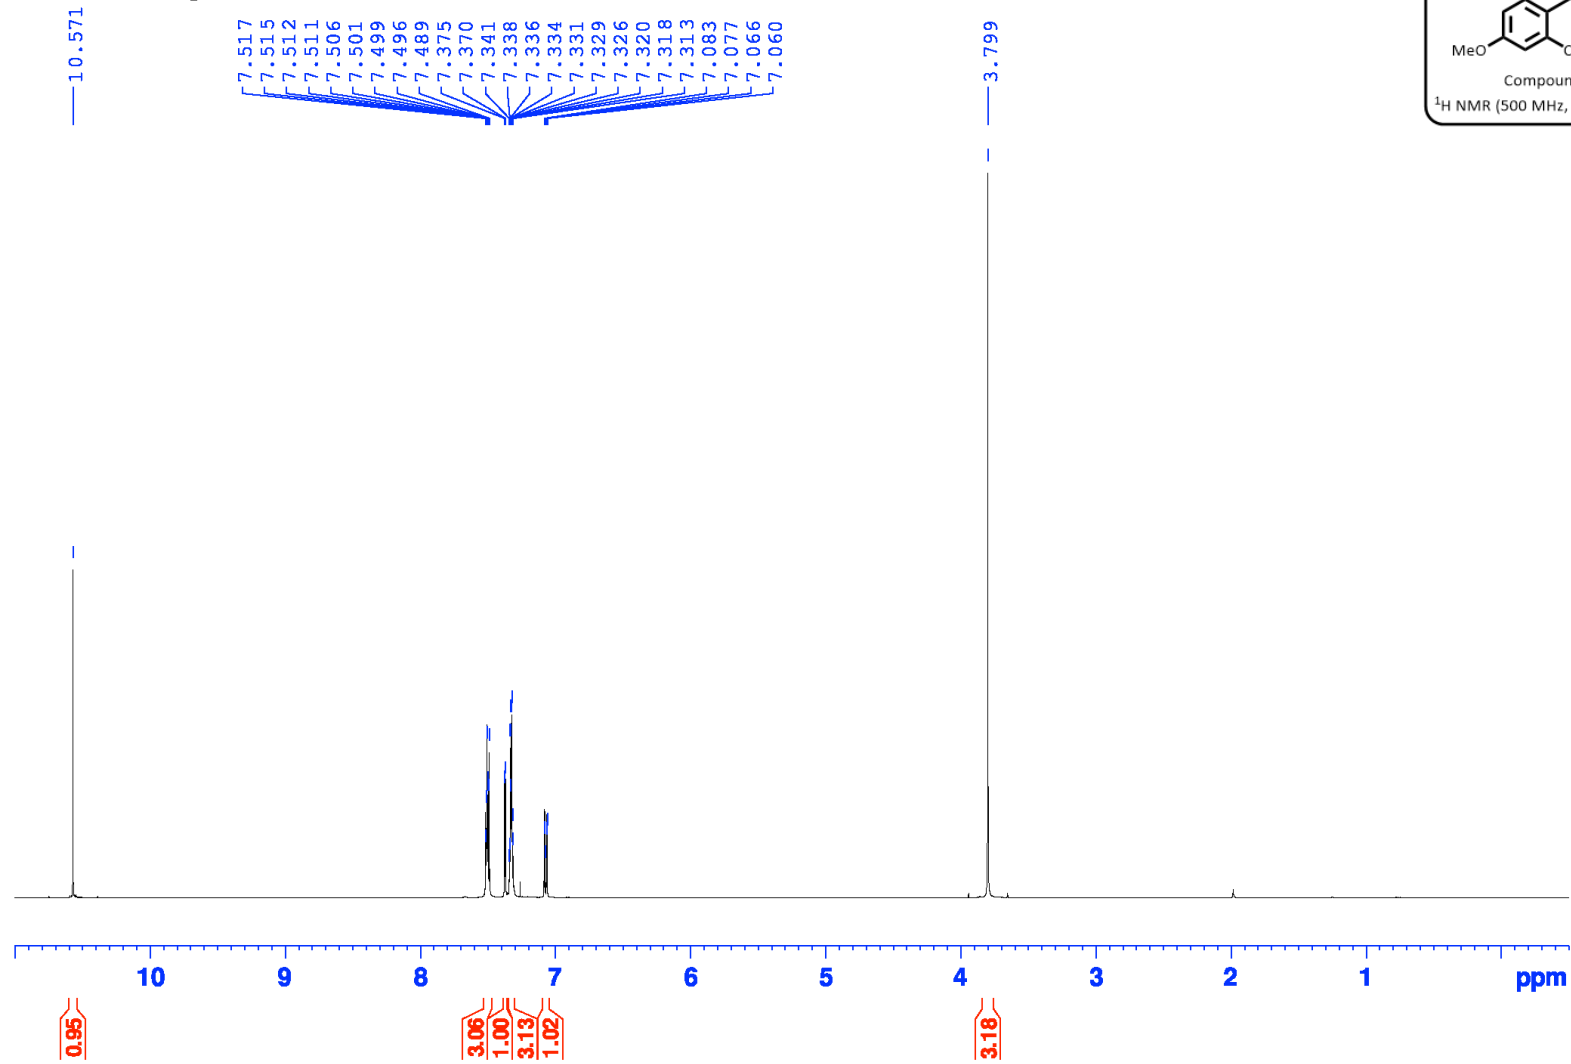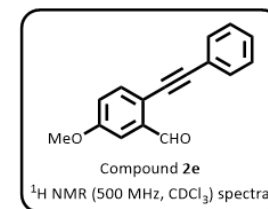

# The $^{13}\text{C}$ NMR spectrum in $\text{CDCl}_3$ of compound 2e.

13C CYL-710 sep 3334 0811

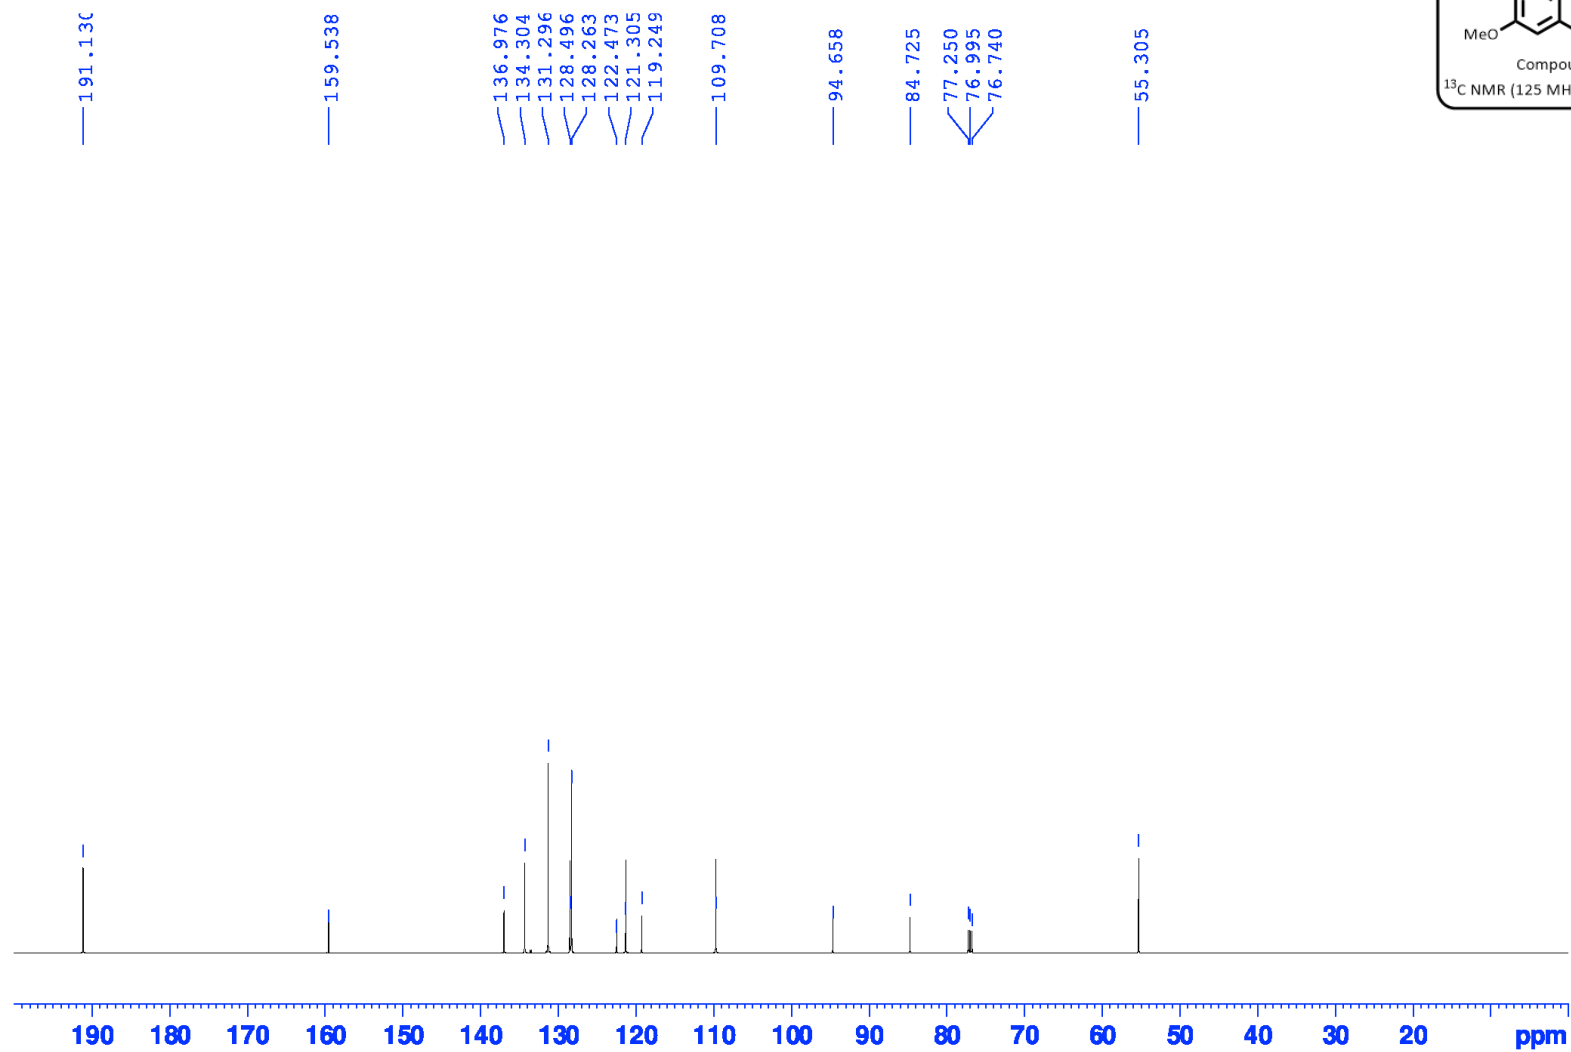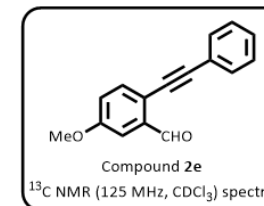

# The $^1\text{H}$ NMR spectrum in $\text{CDCl}_3$ of compound 2f.

1H CYL-702 sep44 0430

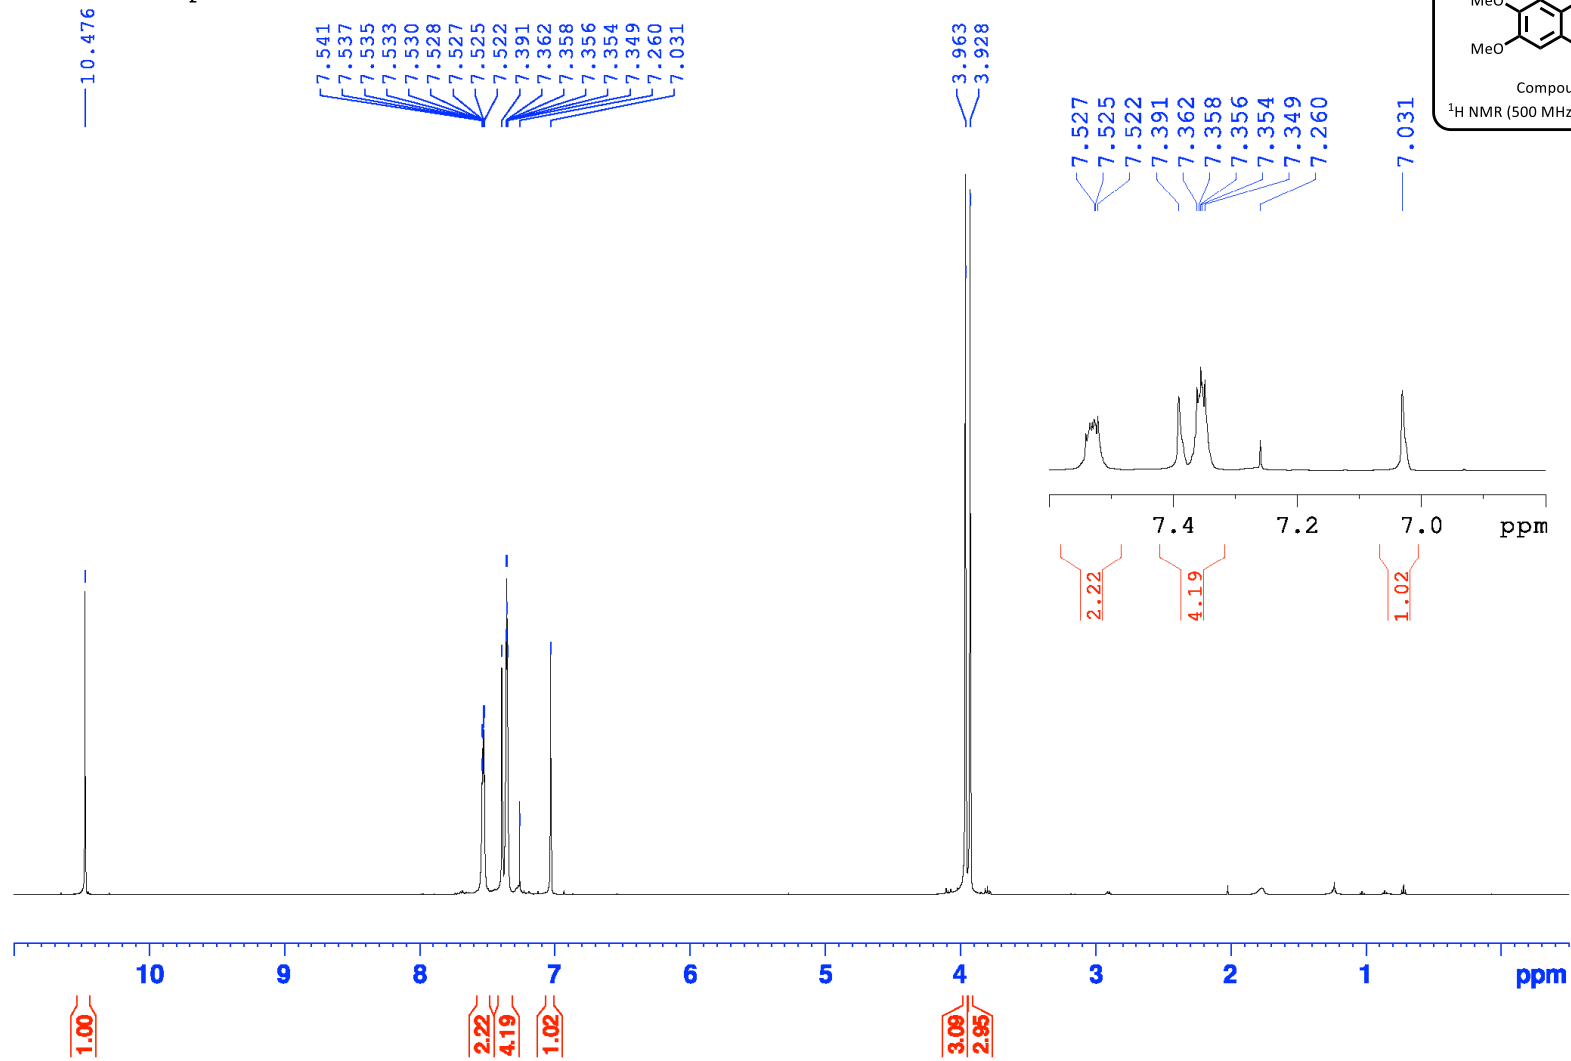

# The $^{13}\text{C}$ NMR spectrum in $\text{CDCl}_3$ of compound 2f.

13C CYL-702 sep44 0430

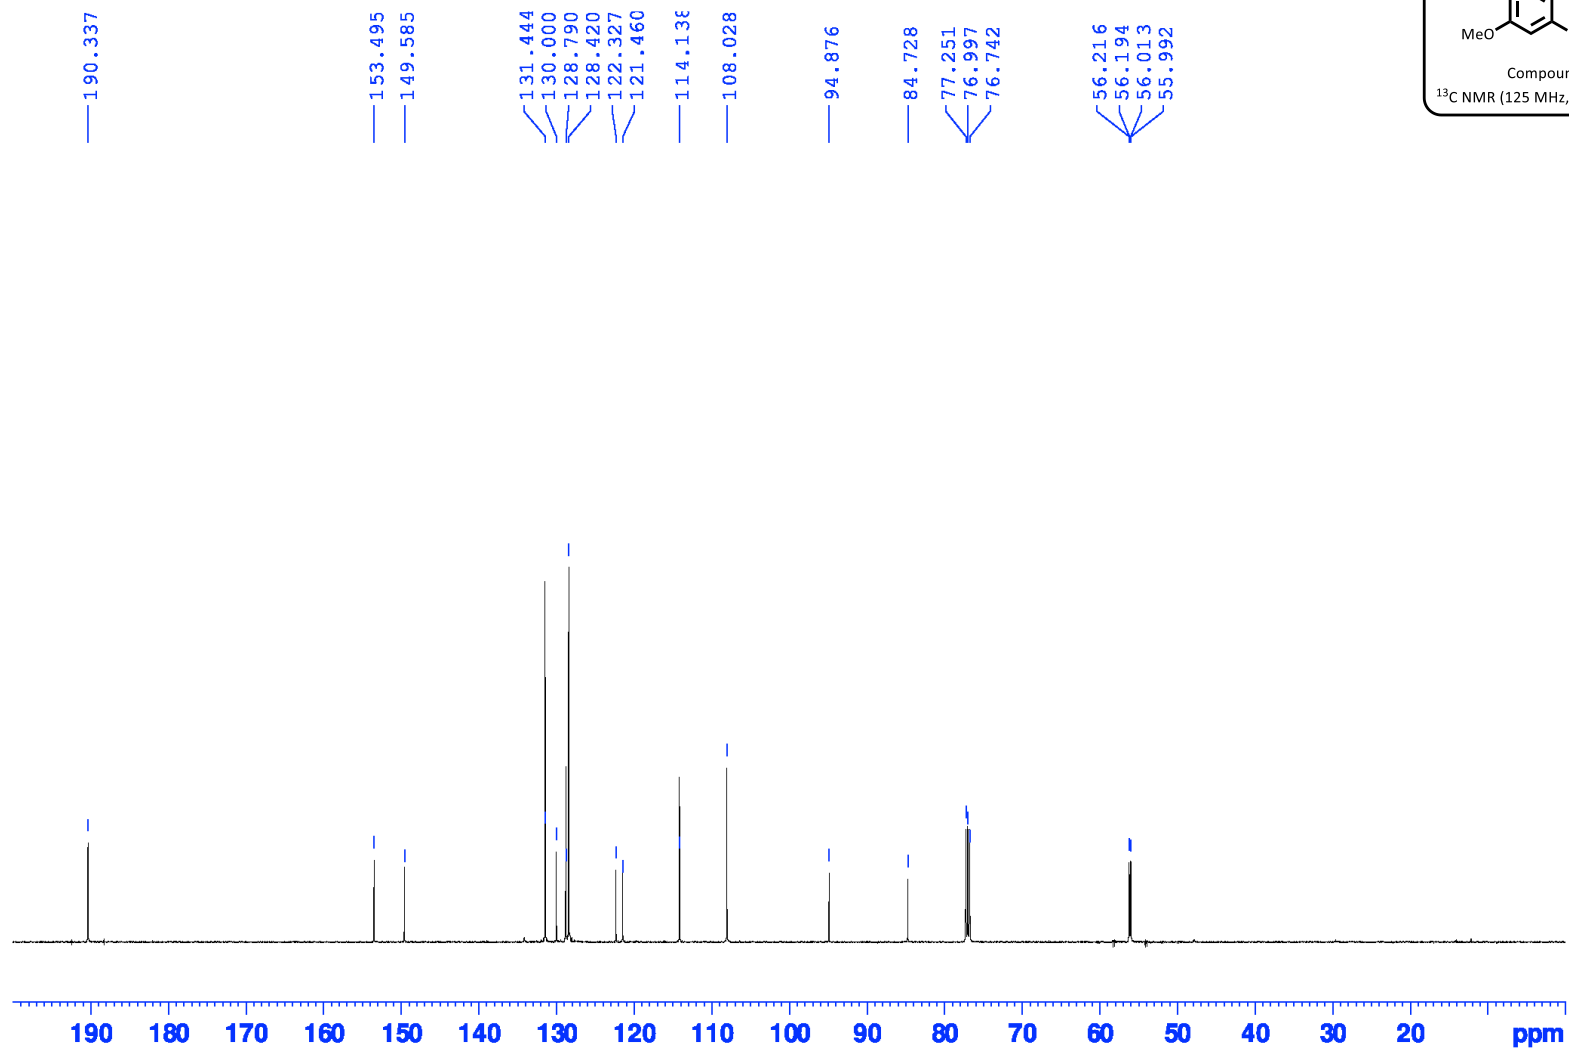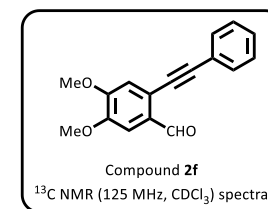

# The $^1\text{H}$ NMR spectrum in $\text{CDCl}_3$ of compound 2g.

$^1\text{H}$  CYL-728

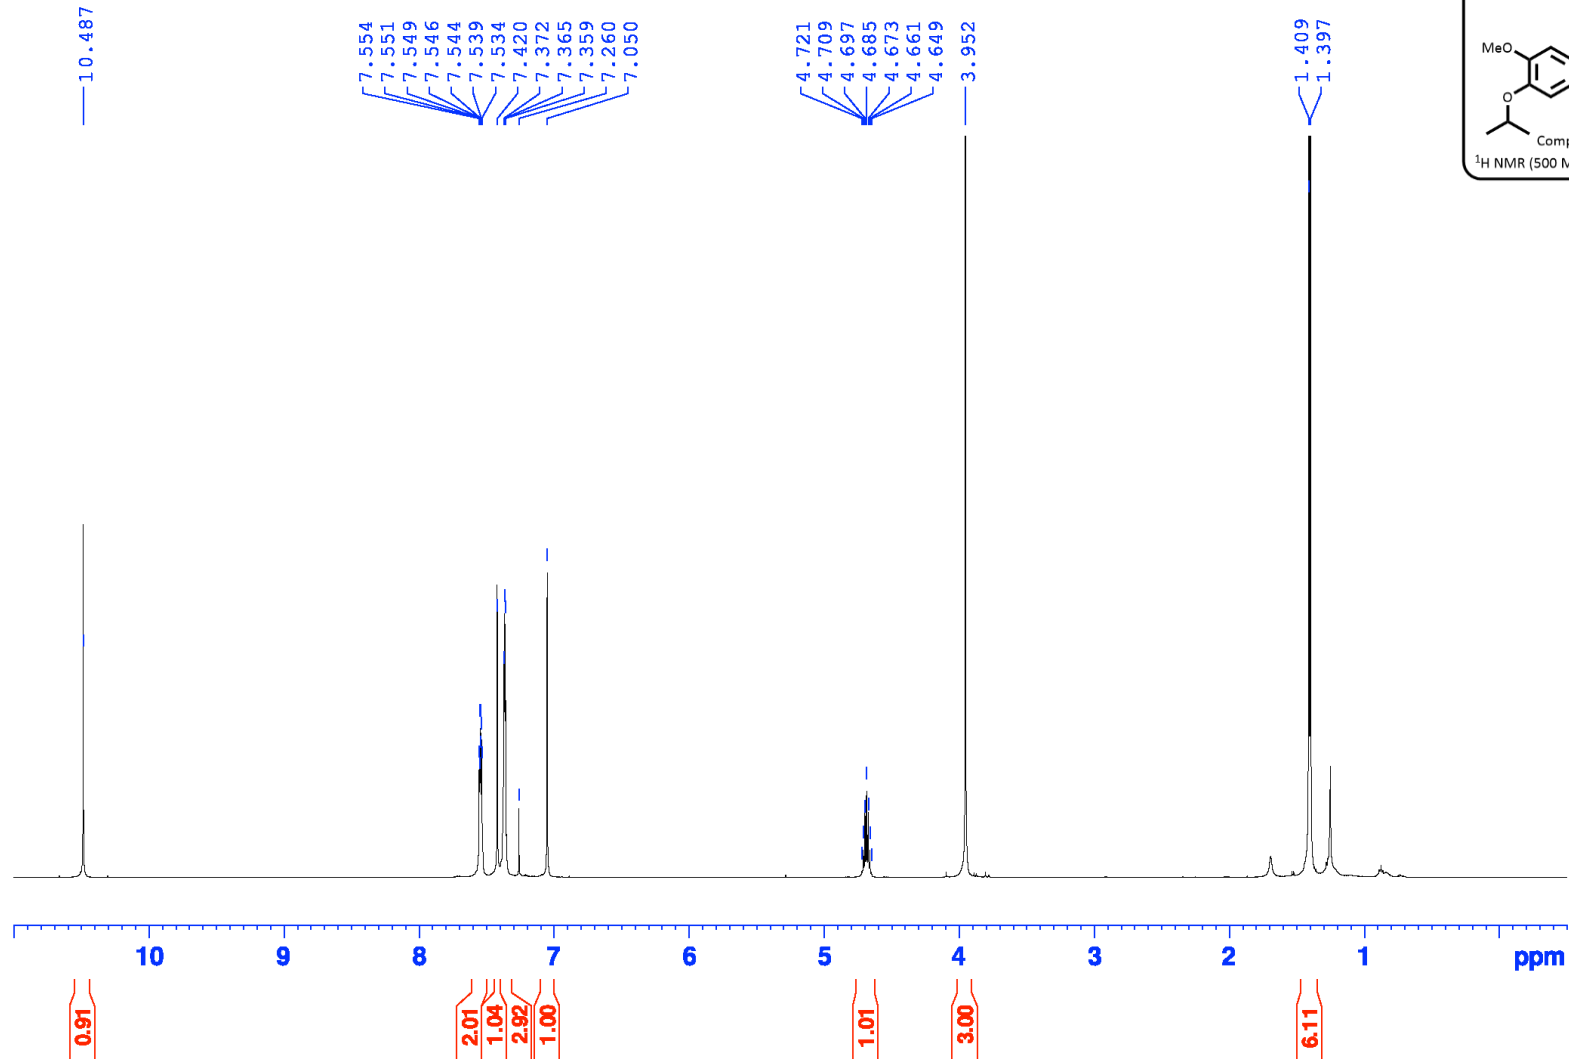

# The <sup>13</sup>C NMR spectrum in CDCl<sub>3</sub> of compound 2g.

13C CYL-728

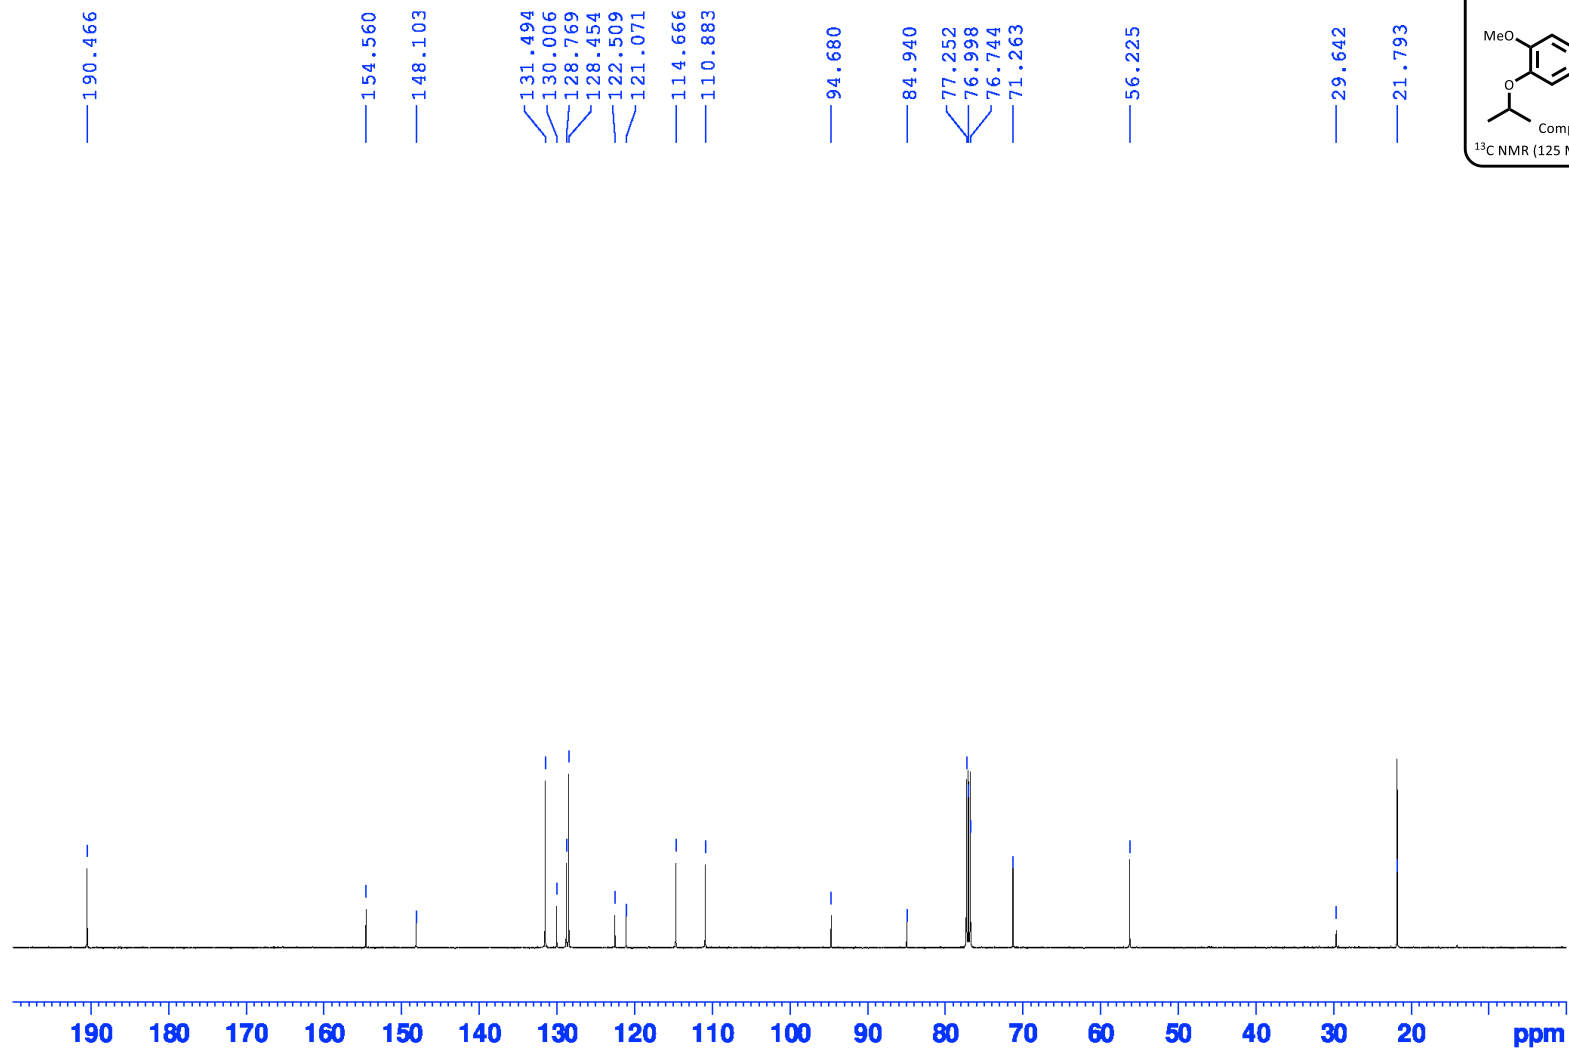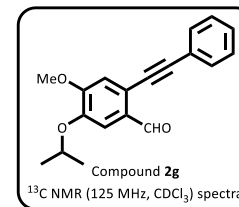



# The $^1\text{H}$ NMR spectrum in $\text{CDCl}_3$ of compound 2h.

1H CYL-729 sep 48 0218

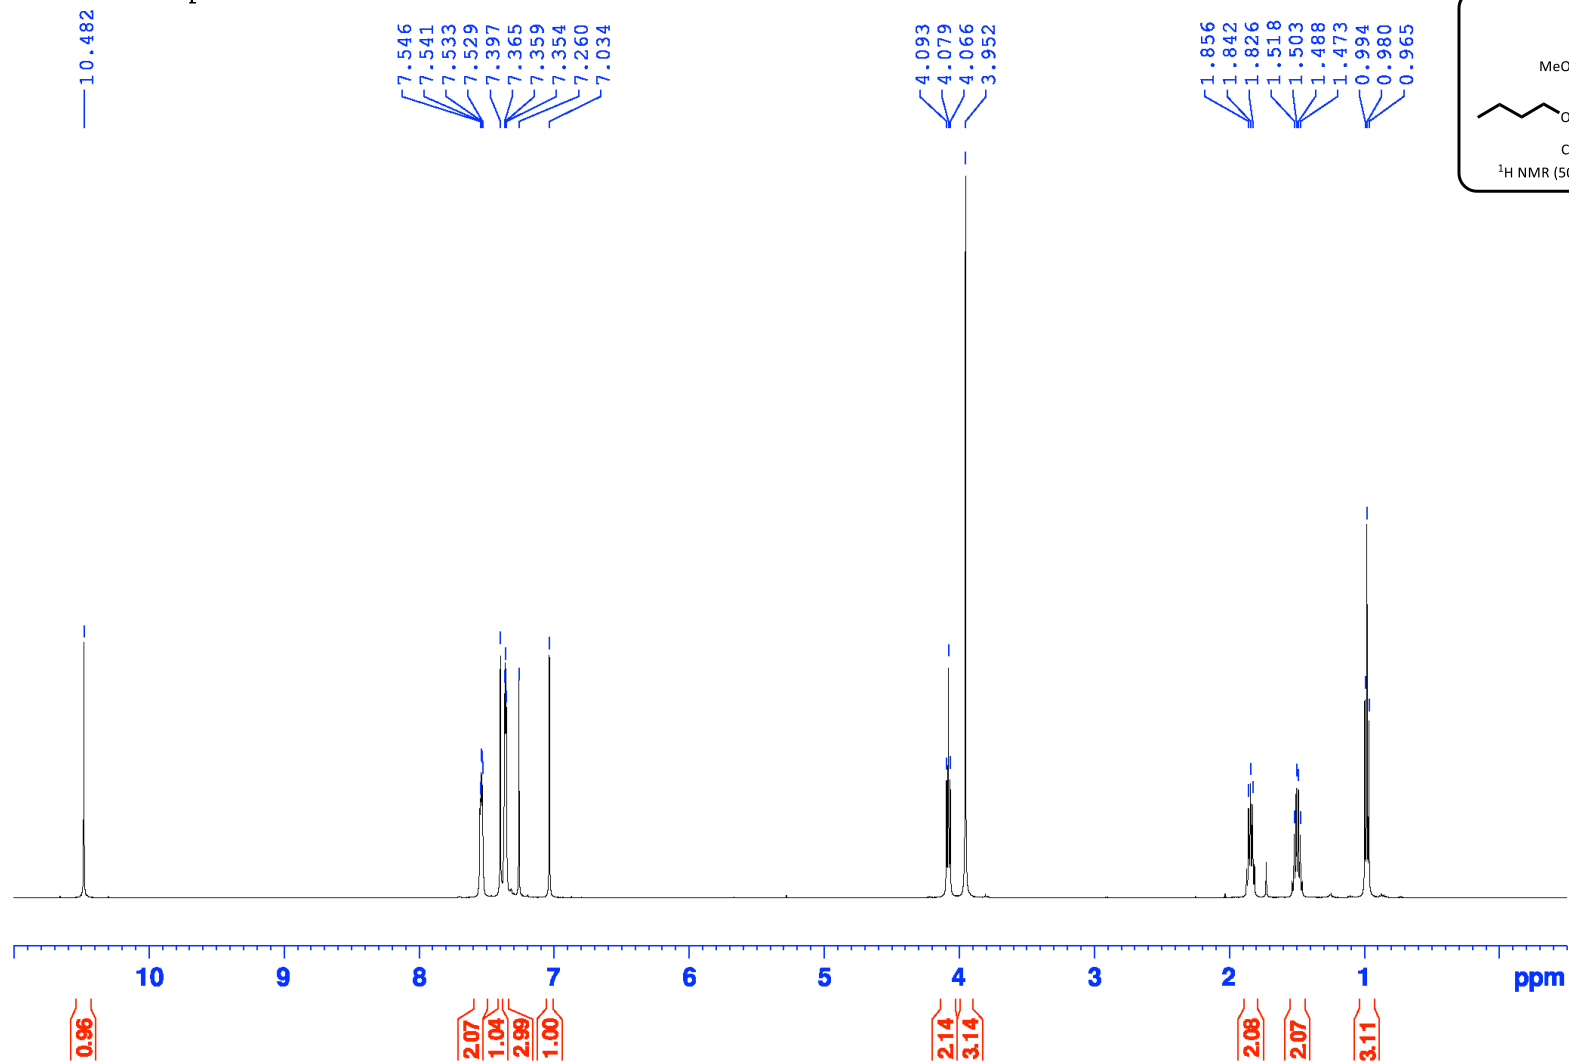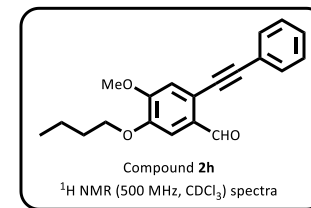

# The $^{13}\text{C}$ NMR spectrum in $\text{CDCl}_3$ of compound 2h.

13C CYL-729 sep 48 0218

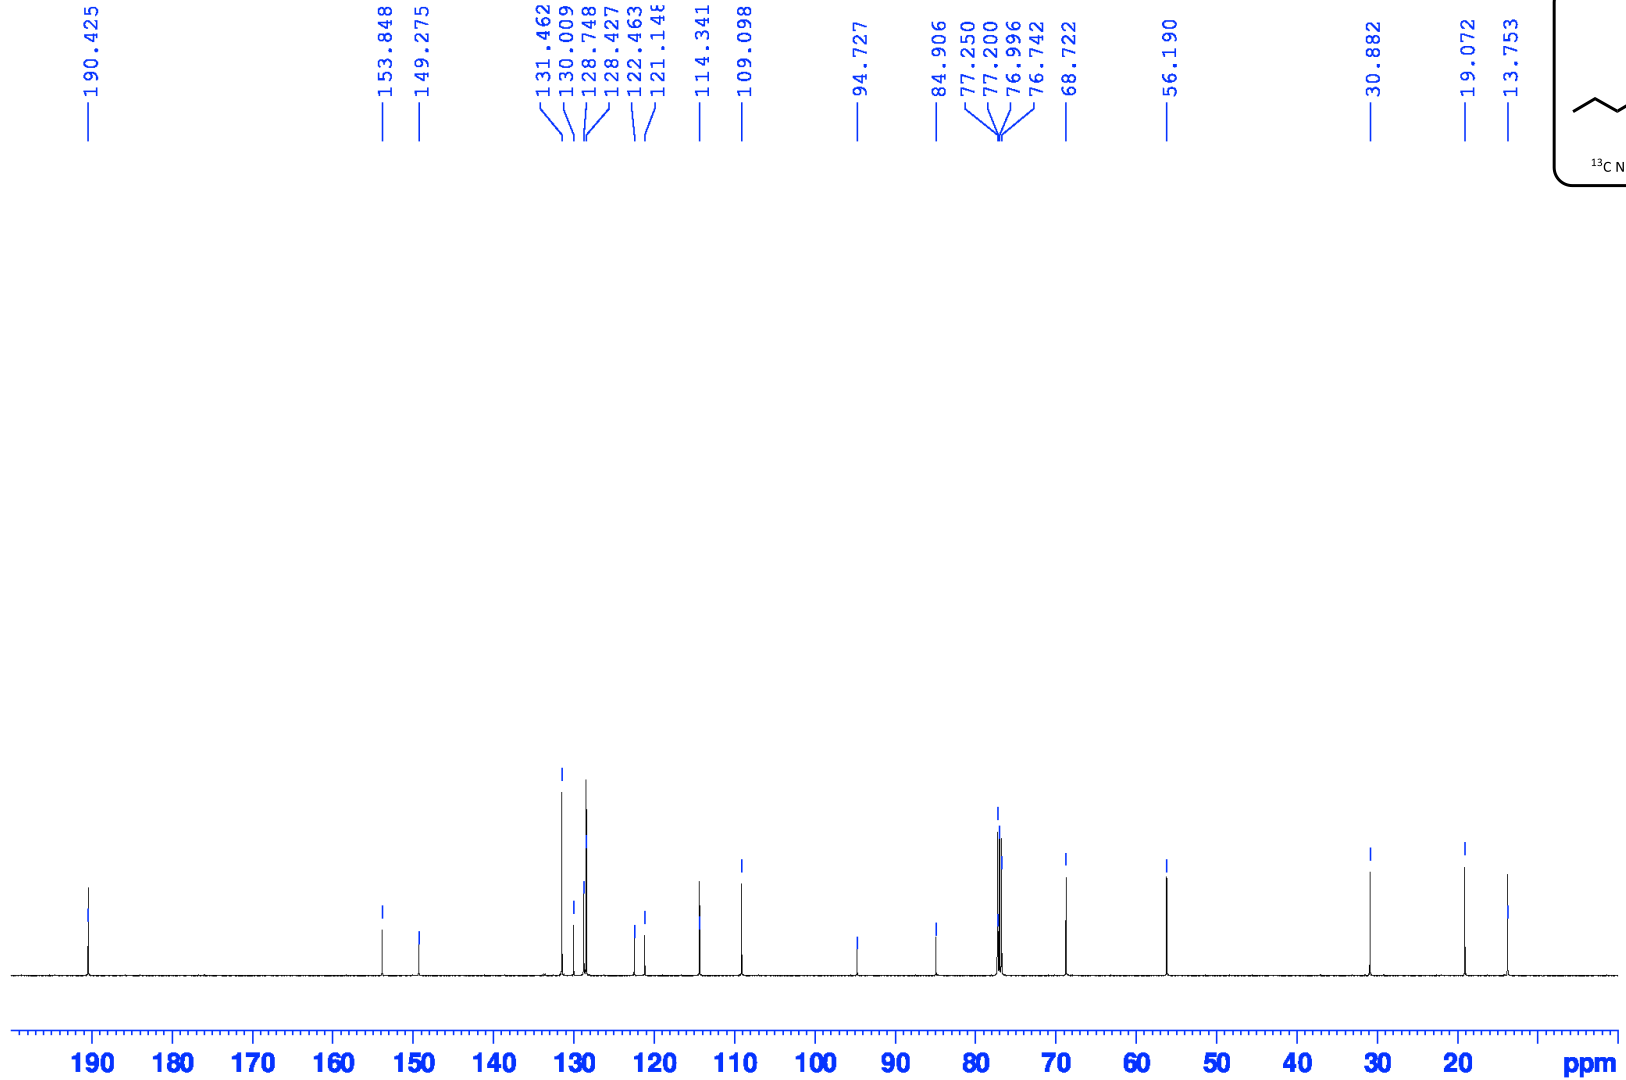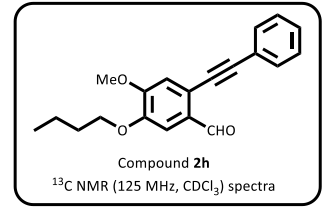

# The $^1\text{H}$ NMR spectrum in $\text{CDCl}_3$ of compound 2i.

1H CYL-711 sep 2930 0812

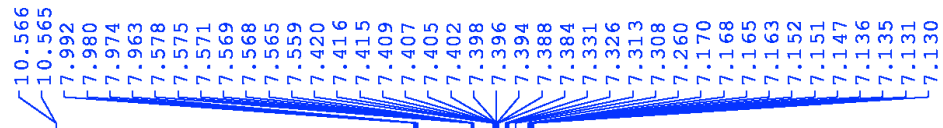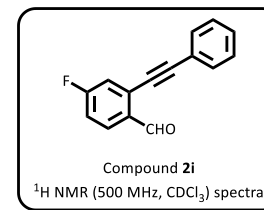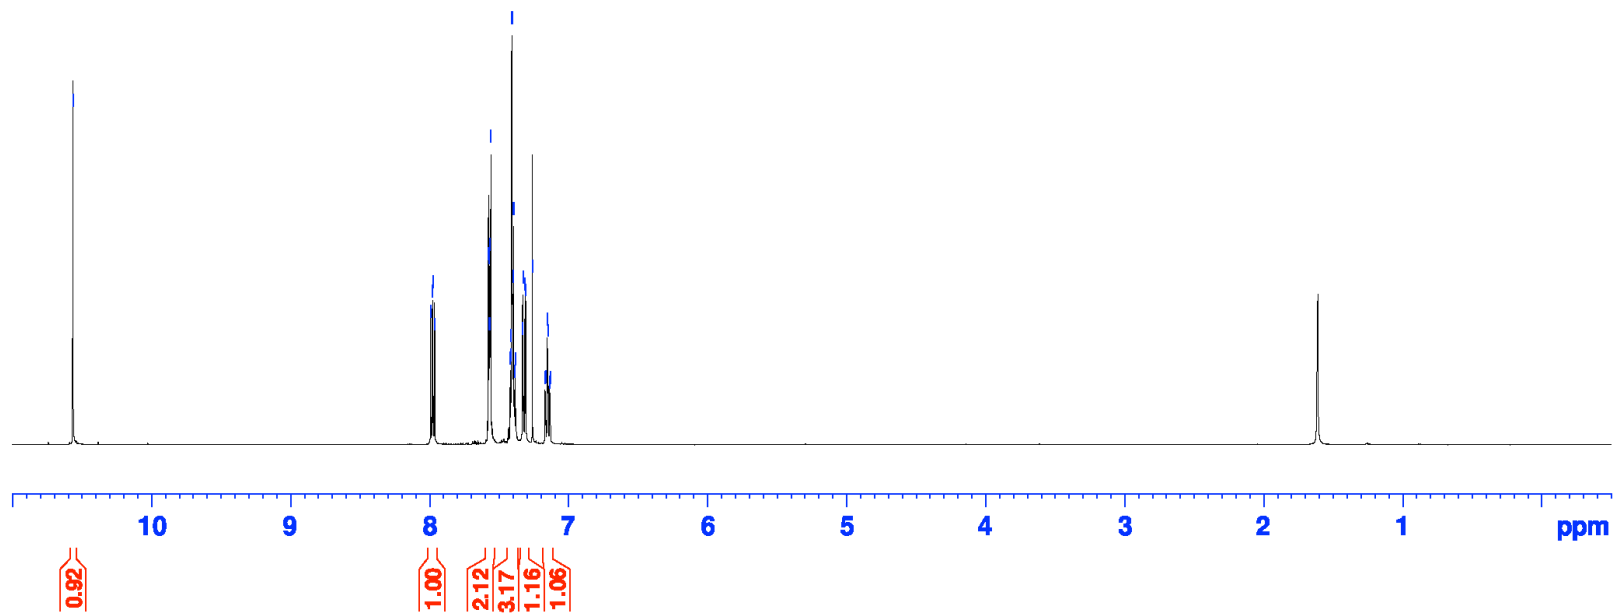

# The $^{13}\text{C}$ NMR spectrum in $\text{CDCl}_3$ of compound 2i.

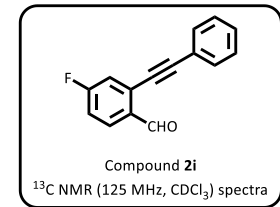

13C CYL-711 sep 2930 0812

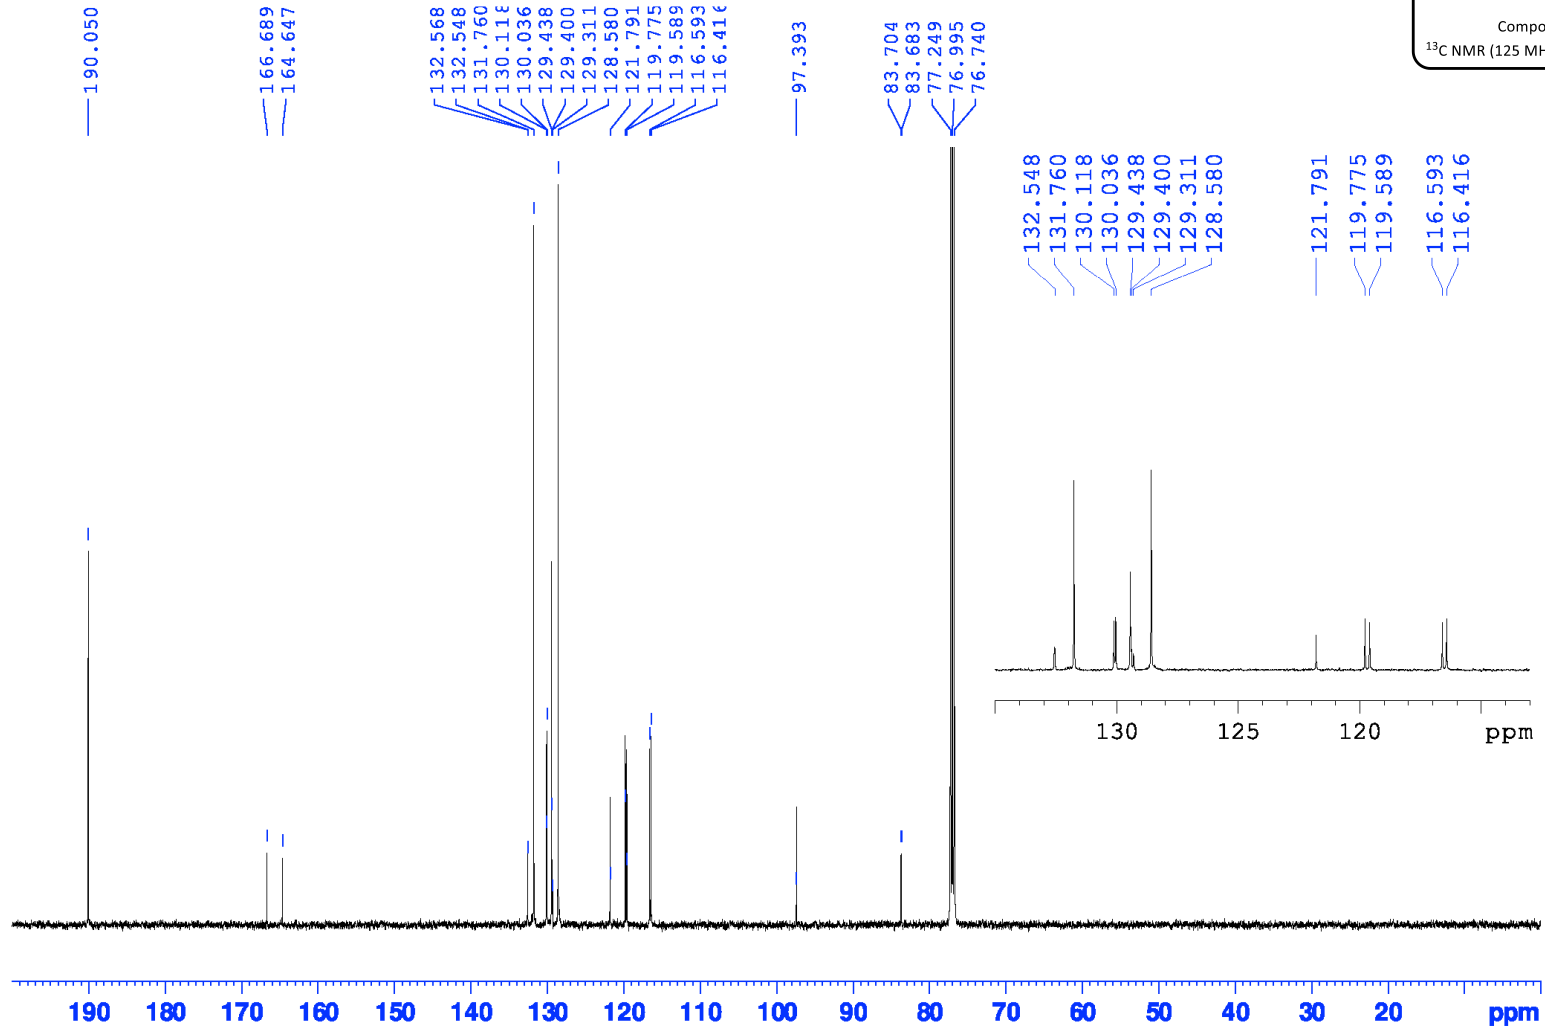

# The $^1\text{H}$ NMR spectrum in $\text{CDCl}_3$ of compound 2j.

1H CYL-712 sep 5455 0813

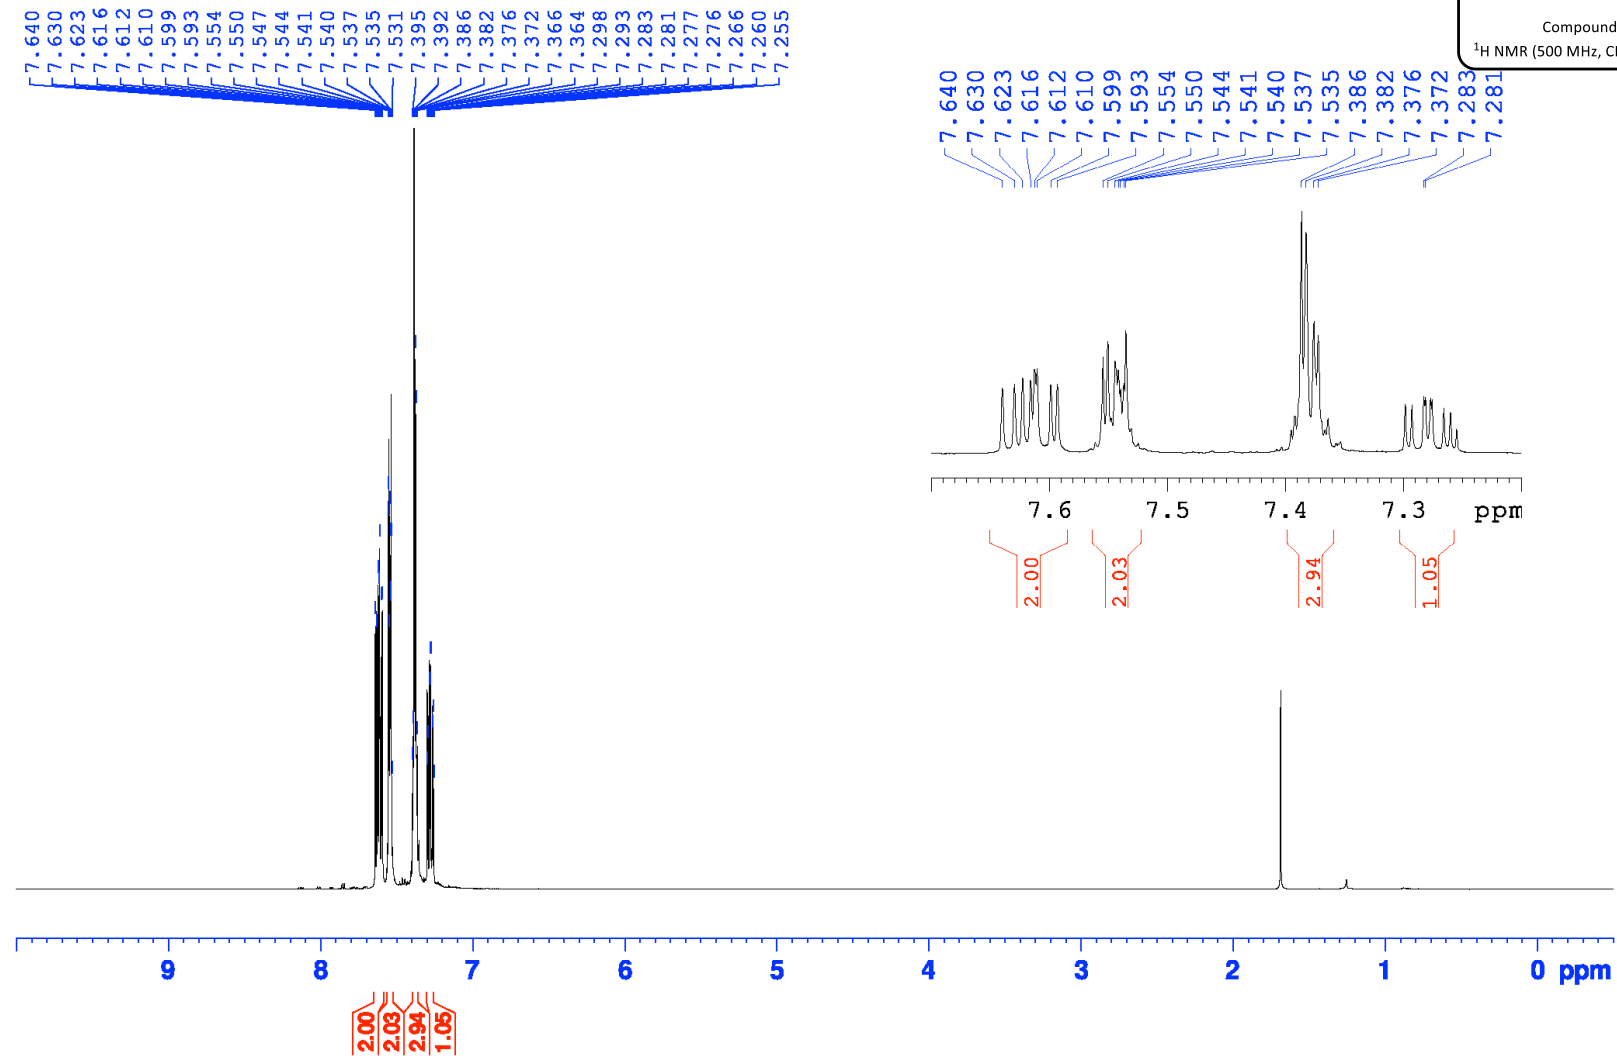

# The $^{13}\text{C}$ NMR spectrum in $\text{CDCl}_3$ of compound 2j.

13C CYL-712 sep 5455 0813

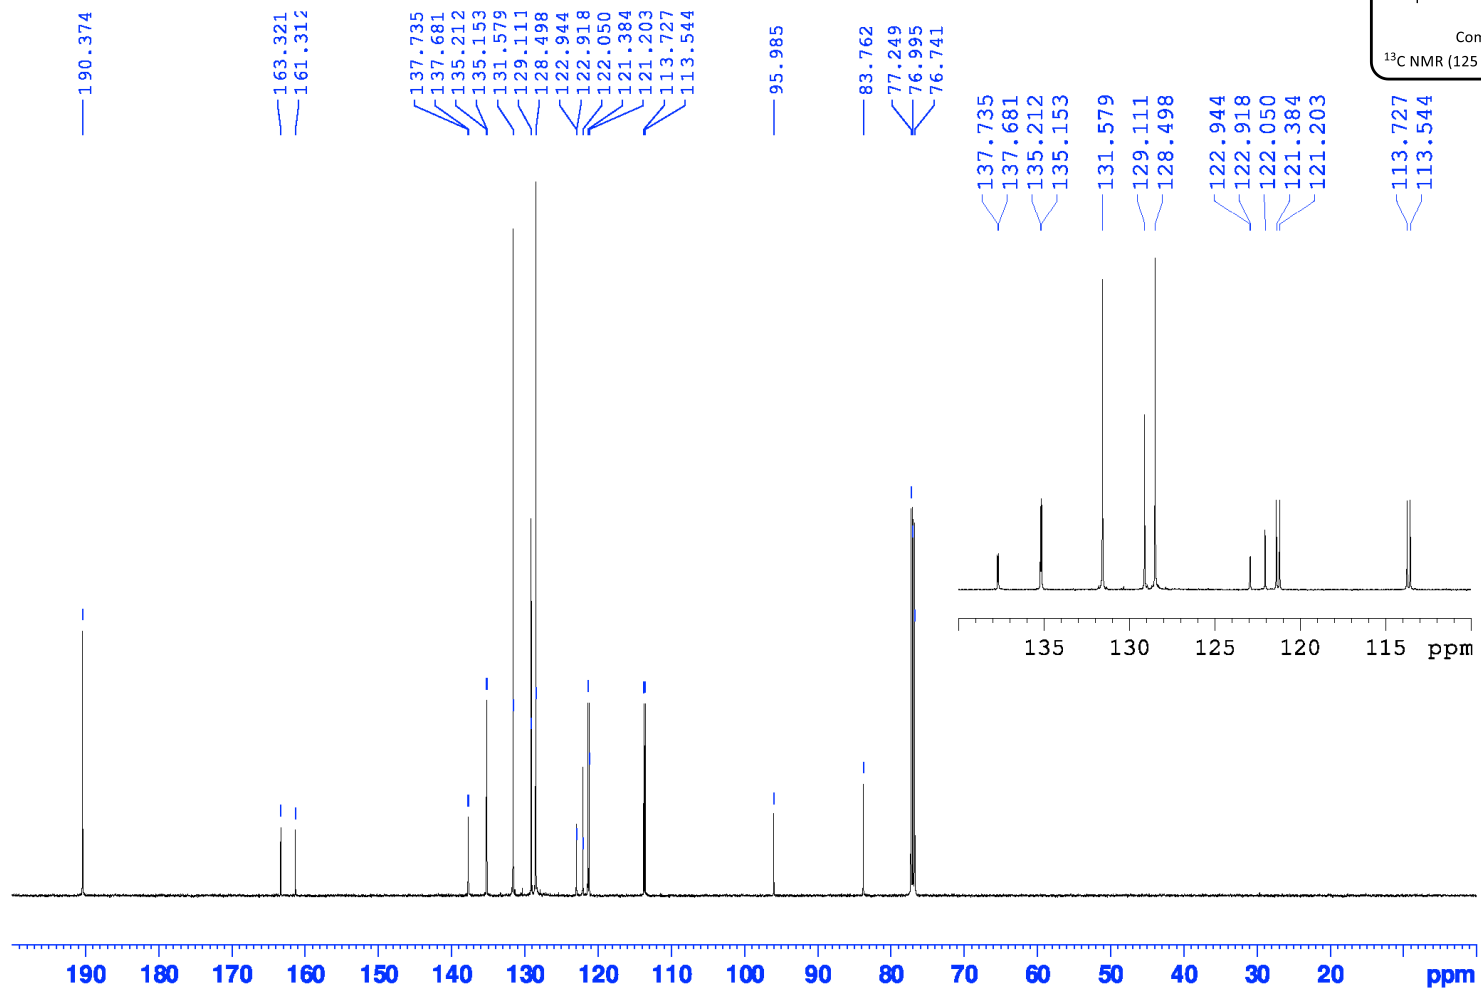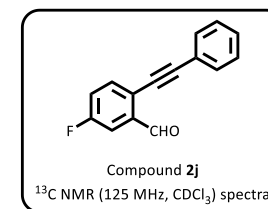

# The $^1\text{H}$ NMR spectrum in $\text{CDCl}_3$ of compound 2k.

1H CYL-716 sep 51 1005

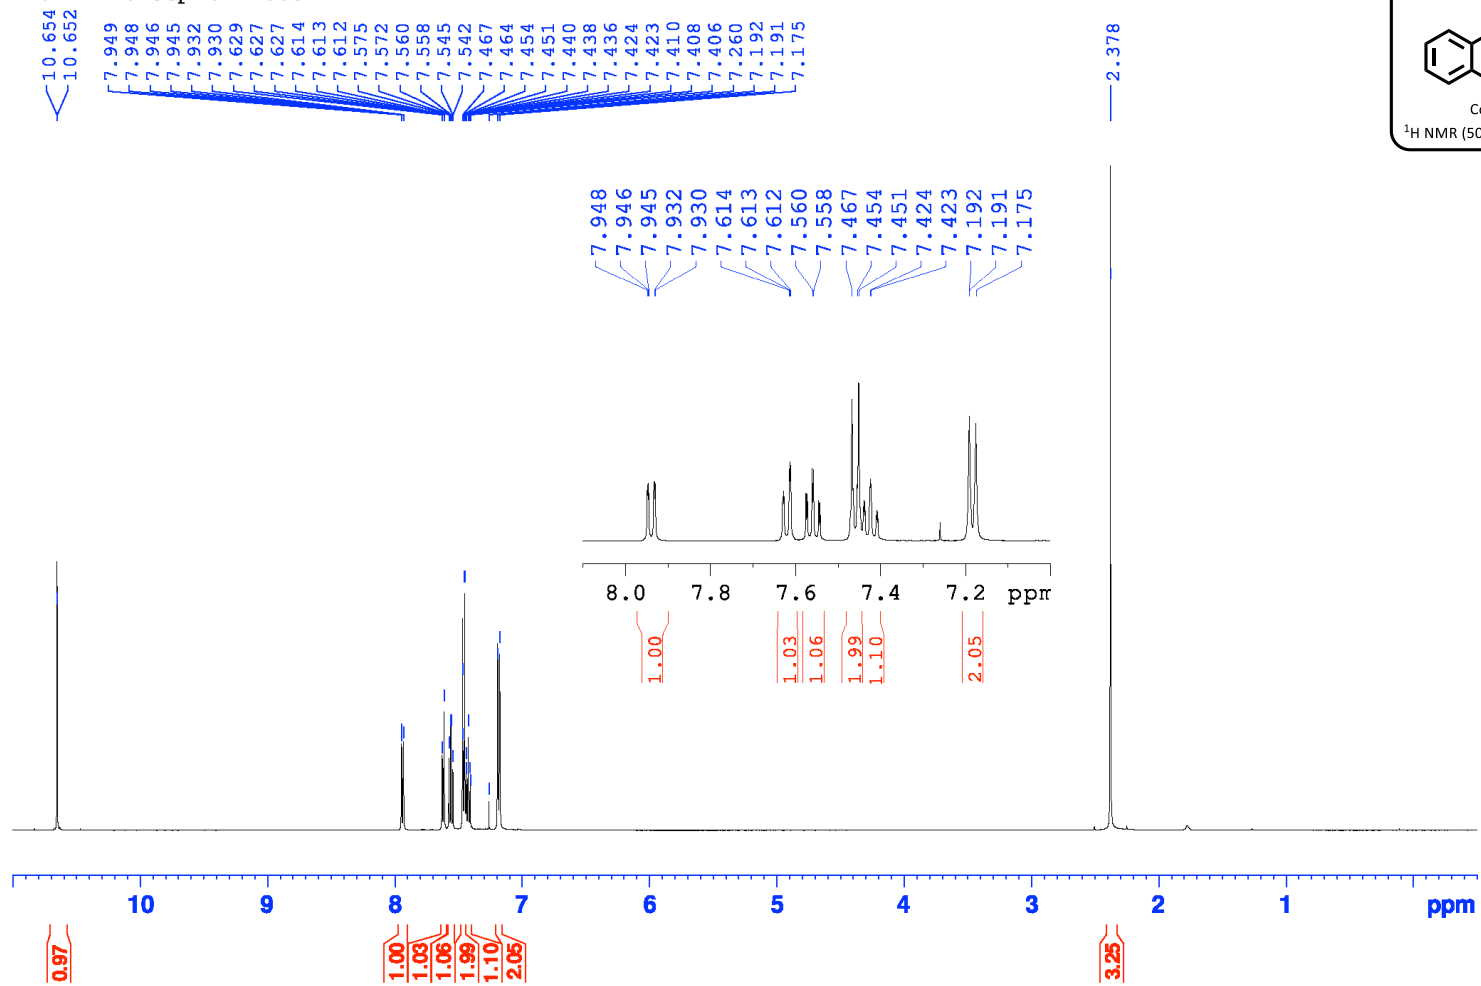

# The $^{13}\text{C}$ NMR spectrum in $\text{CDCl}_3$ of compound 2k.

13C CYL-716 sep 51 1005

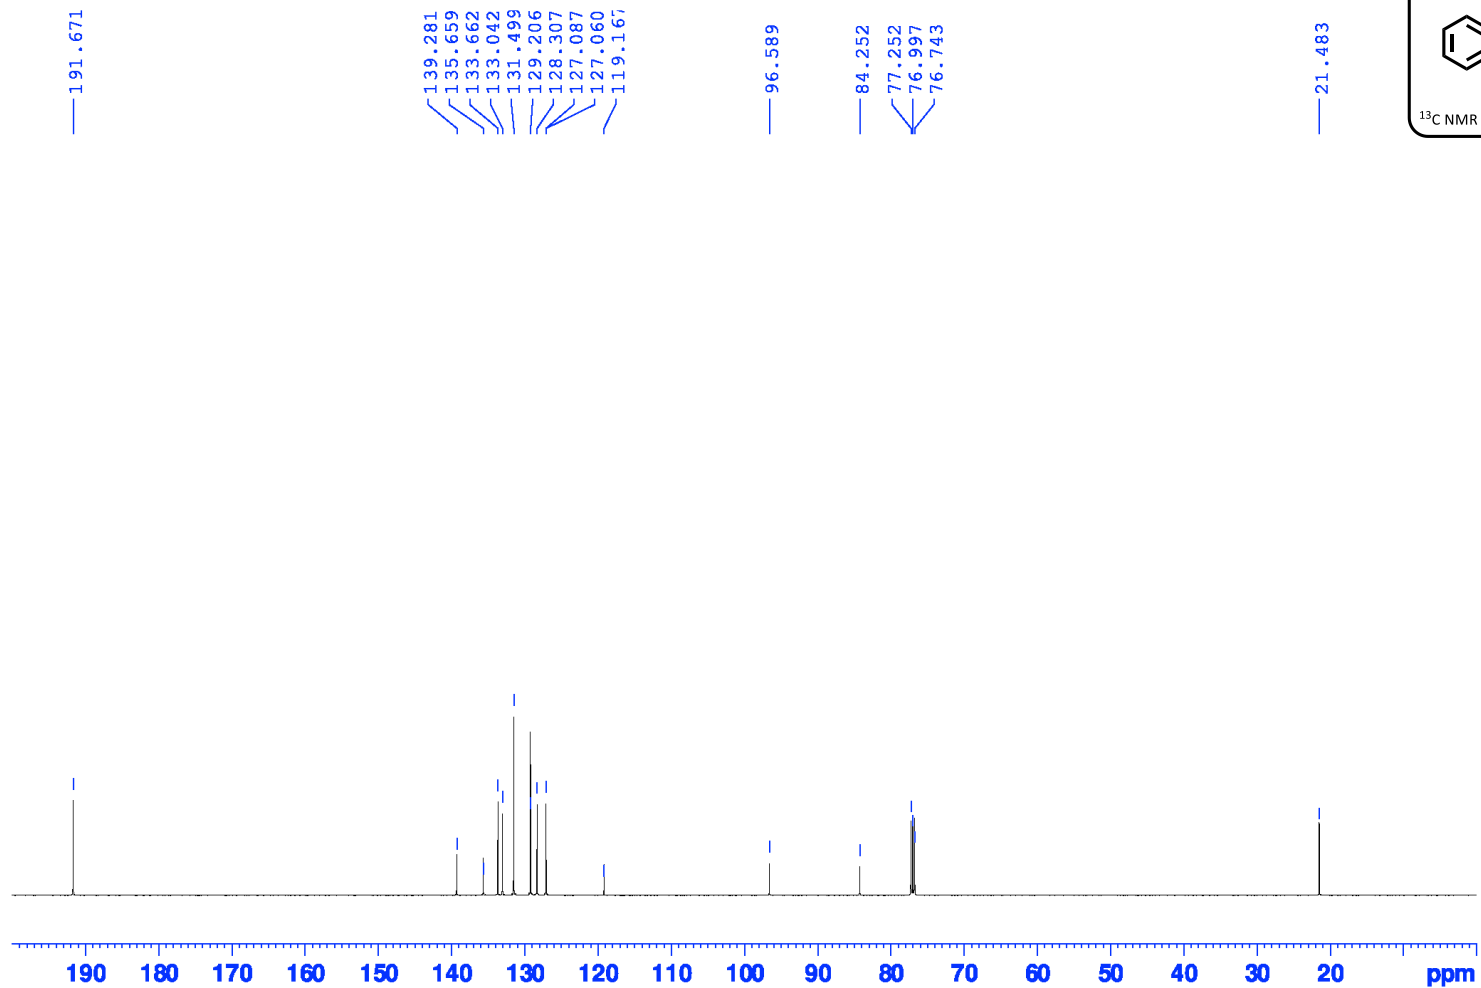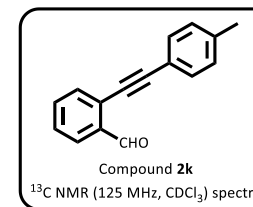



# The $^1\text{H}$ NMR spectrum in $\text{CDCl}_3$ of compound 2l.

1H CYL-717 sep 64 1005

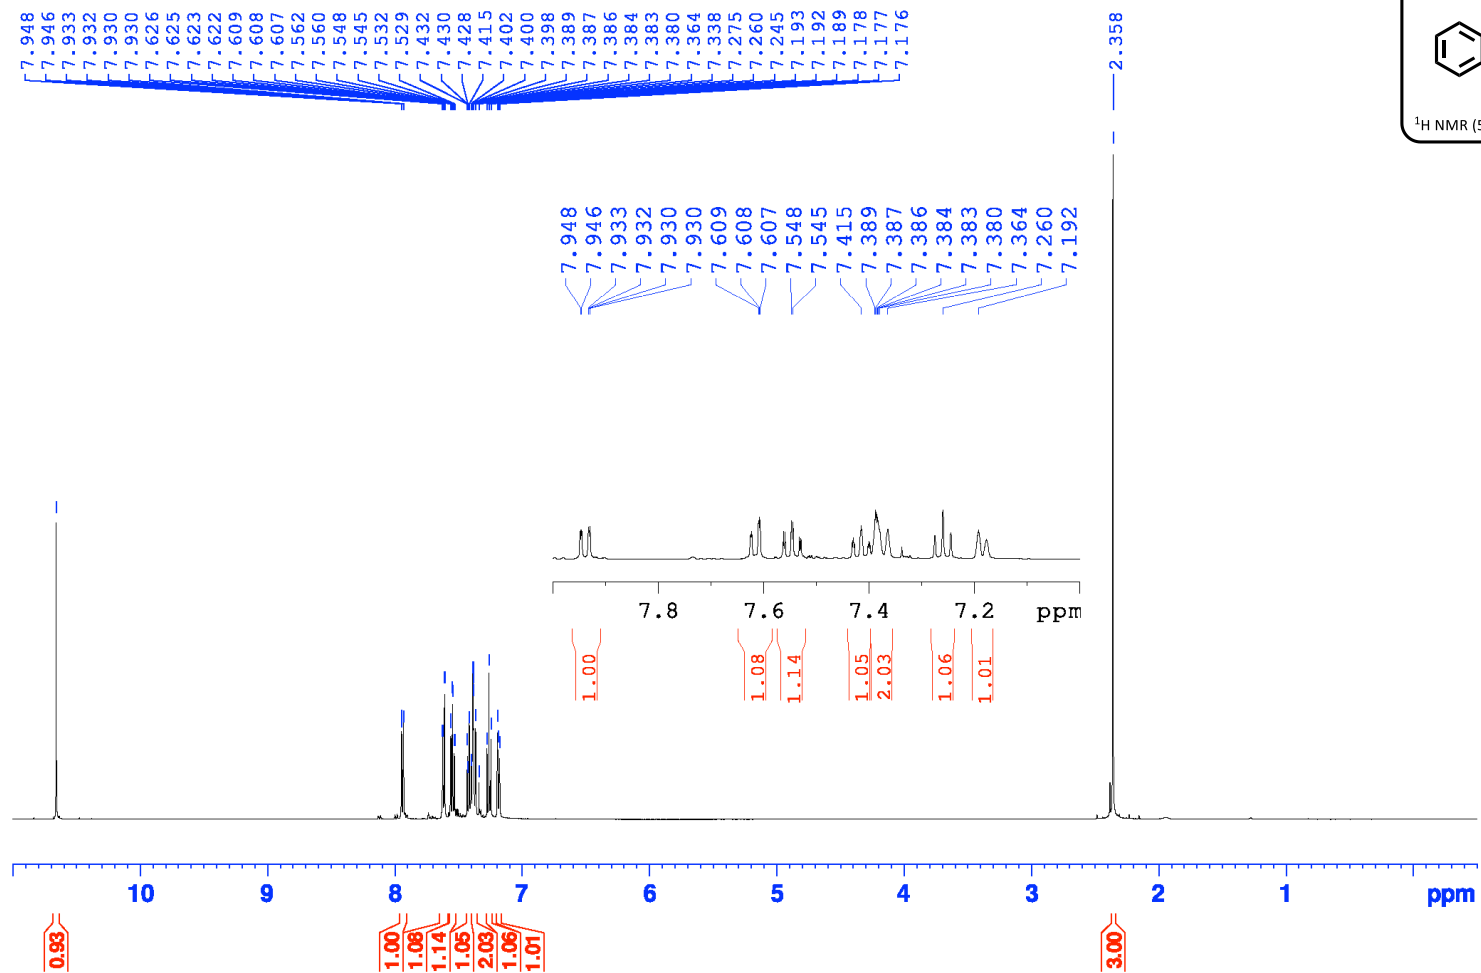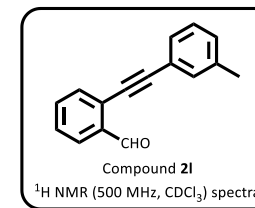

# The $^{13}\text{C}$ NMR spectrum in $\text{CDCl}_3$ of compound 2l.

13C CYL-717 sep 64 1005

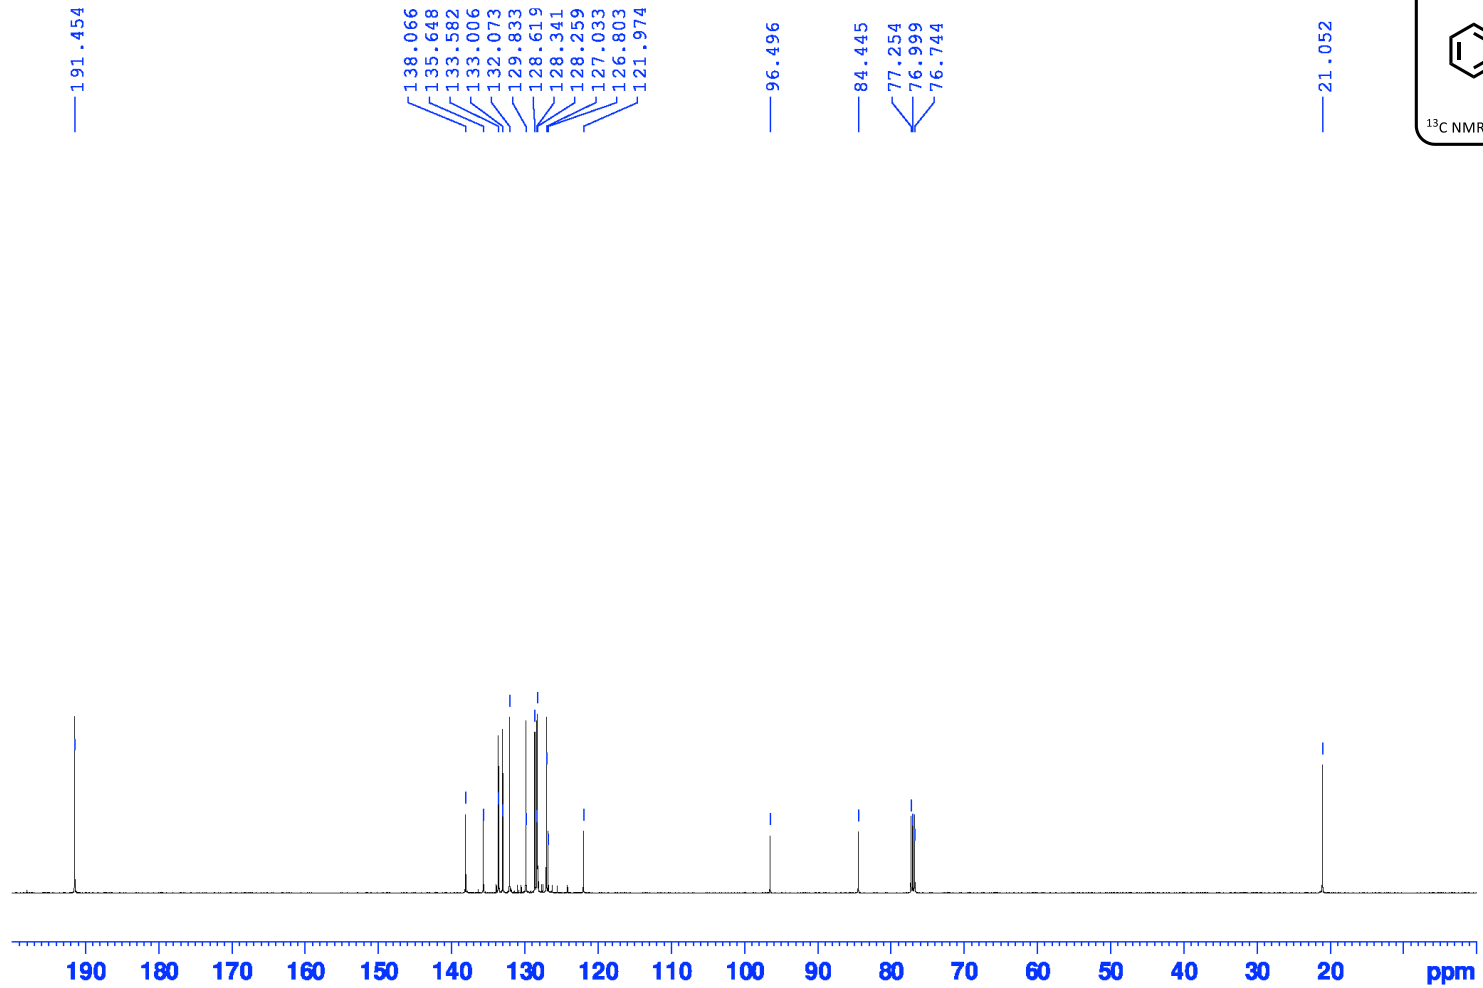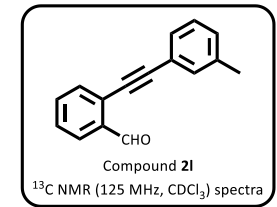

# The $^1\text{H}$ NMR spectrum in $\text{CDCl}_3$ of compound 2m.

1H CYL-726 sep 4243 MPLC 0110

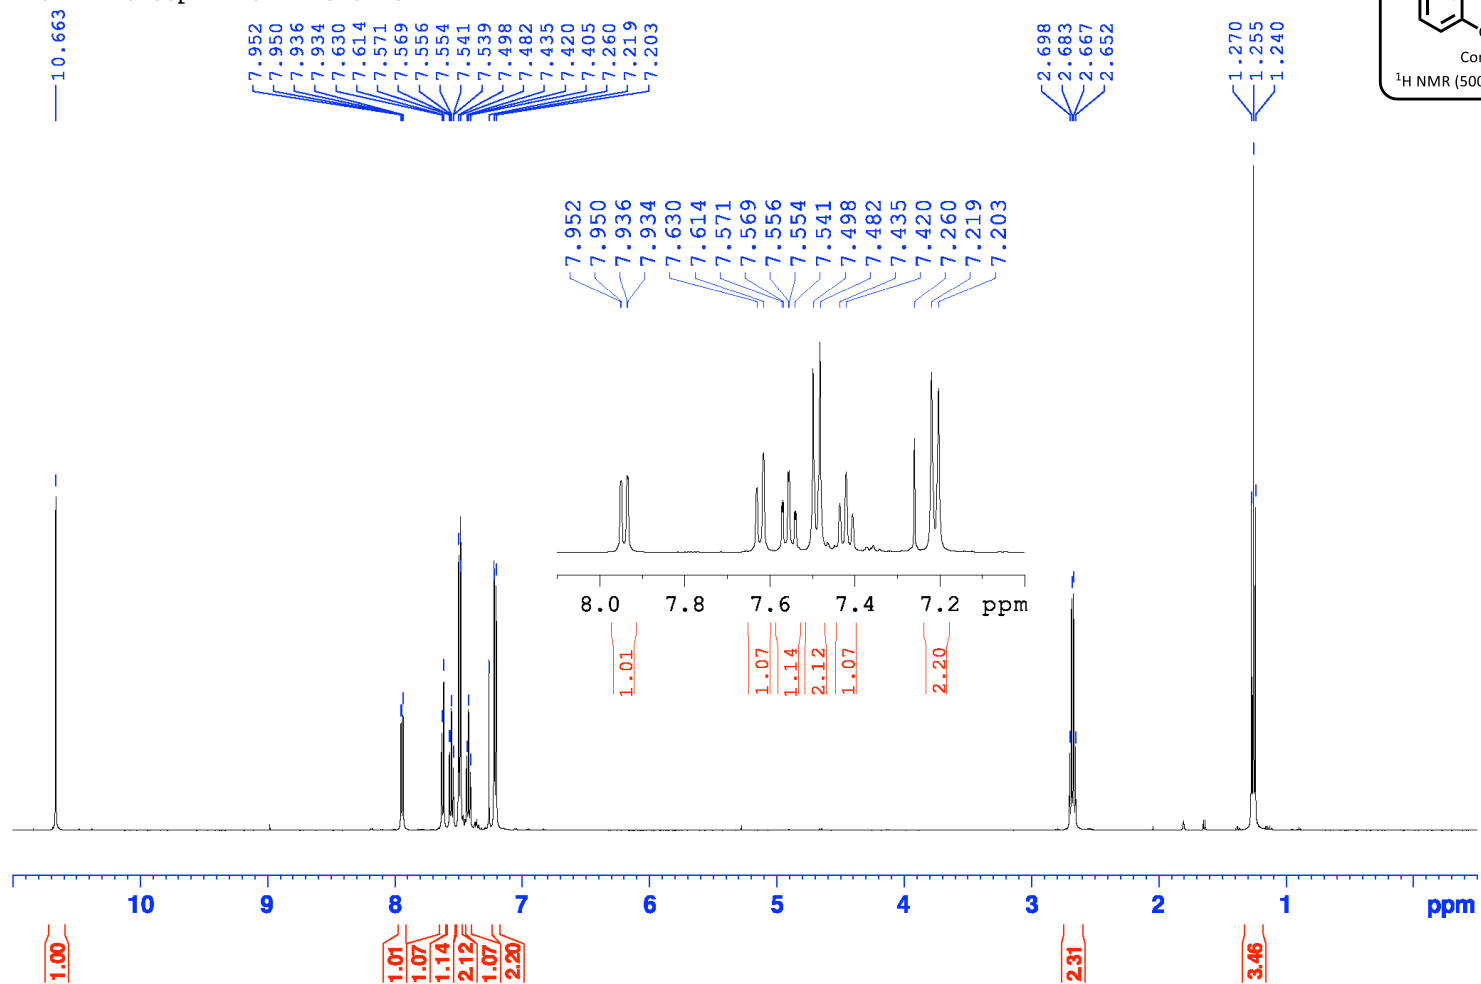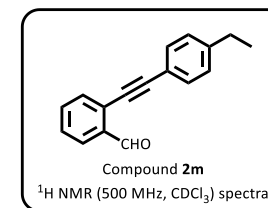

# The $^{13}\text{C}$ NMR spectrum in $\text{CDCl}_3$ of compound 2m.

13C CYL-726 sep 4243 MPLC 0110

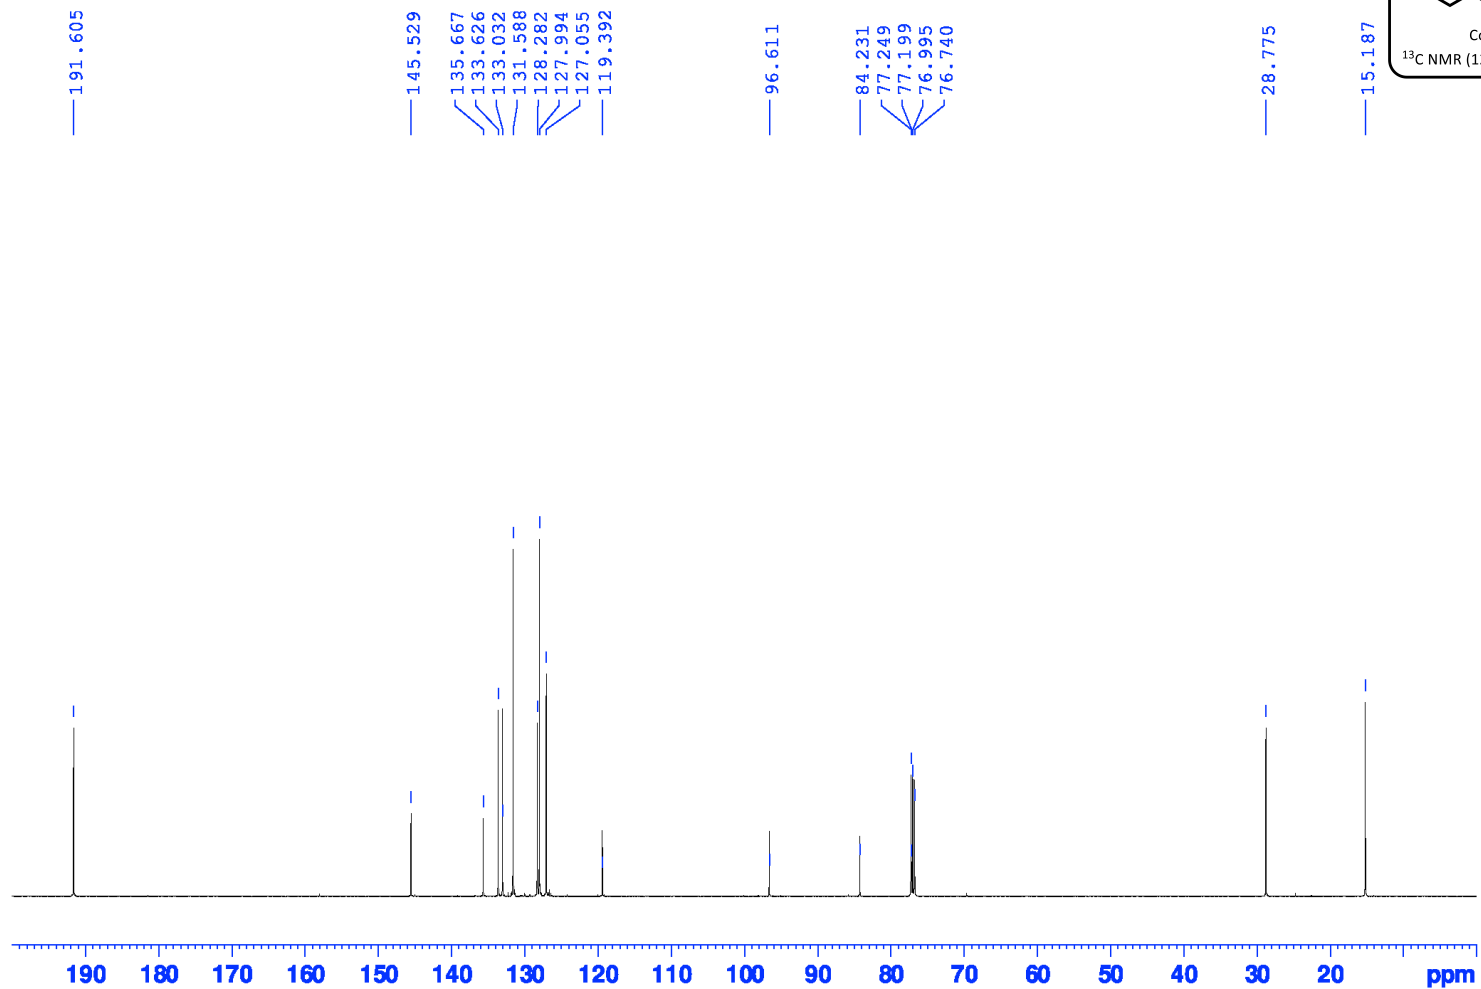

# The $^1\text{H}$ NMR spectrum in $\text{CDCl}_3$ of compound 2n.

1H CYL-722 sep 28 1230

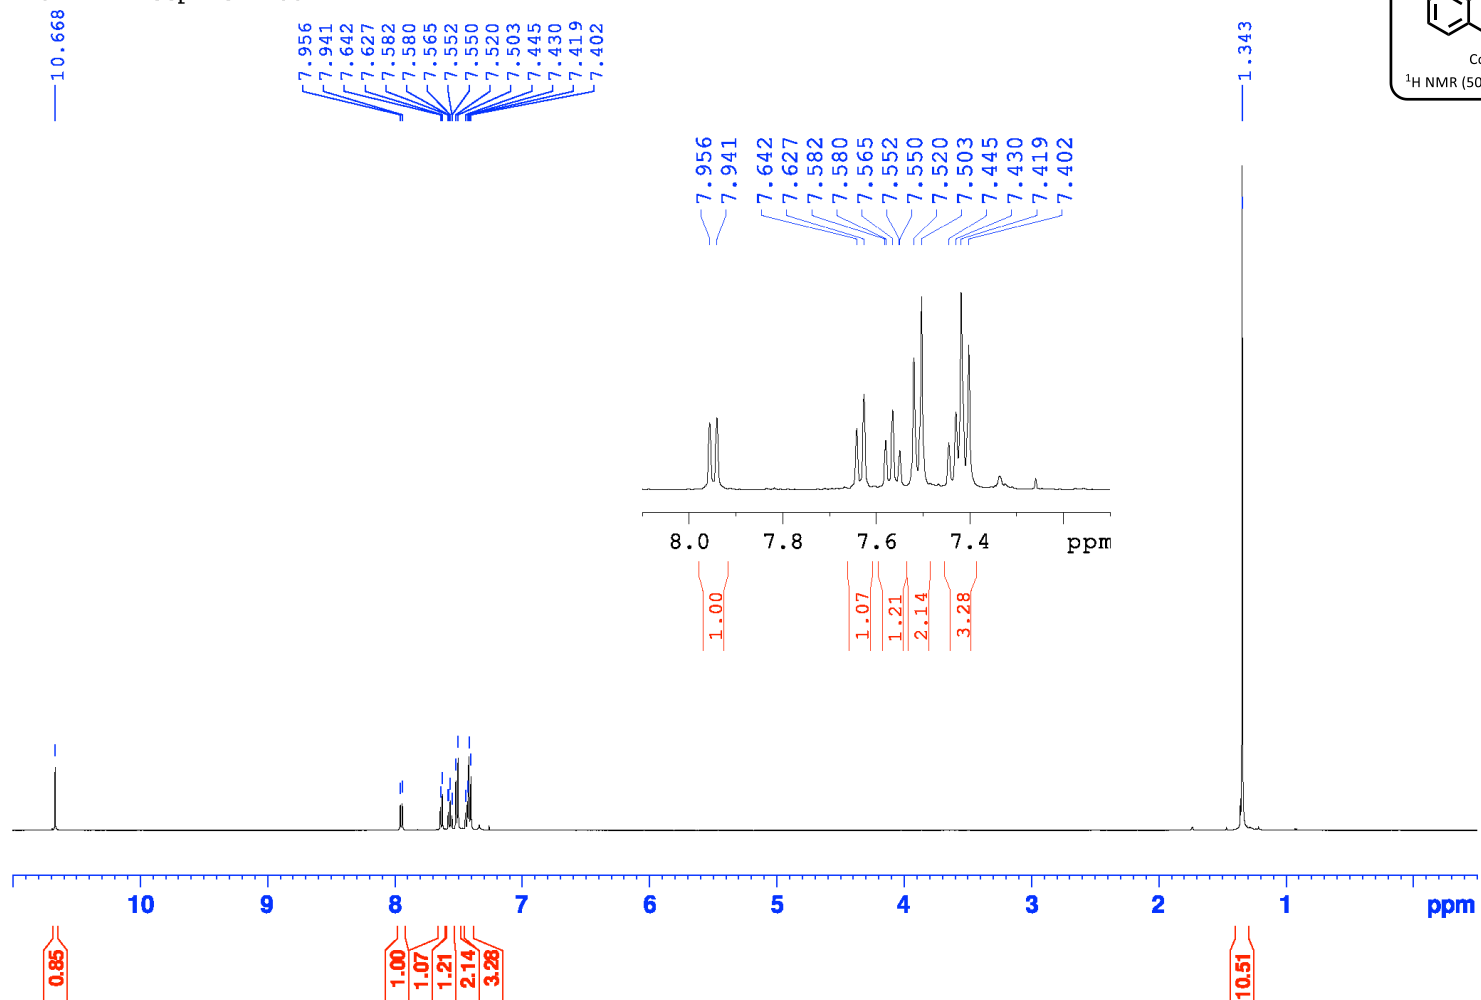

# The $^{13}\text{C}$ NMR spectrum in $\text{CDCl}_3$ of Compound 2n.

13C CYL-722 sep 28 1230

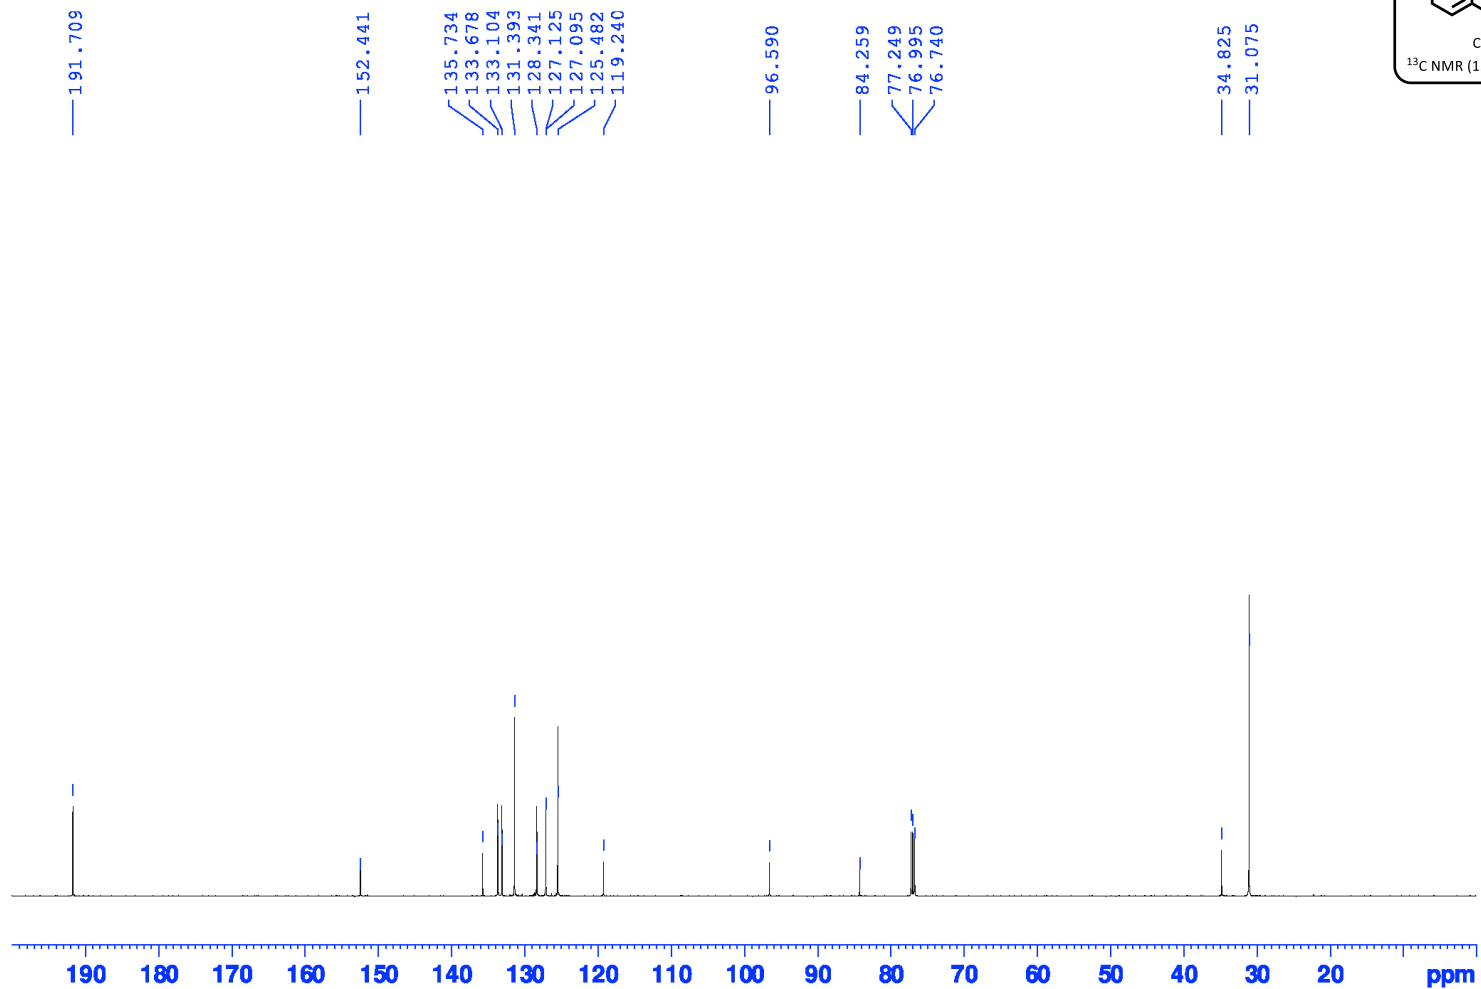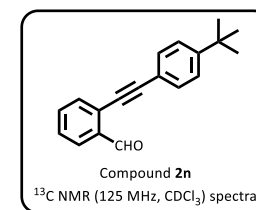

# The $^1\text{H}$ NMR spectrum in $\text{CDCl}_3$ of compound 2o.

1H CYL-713 sep 6768 0818

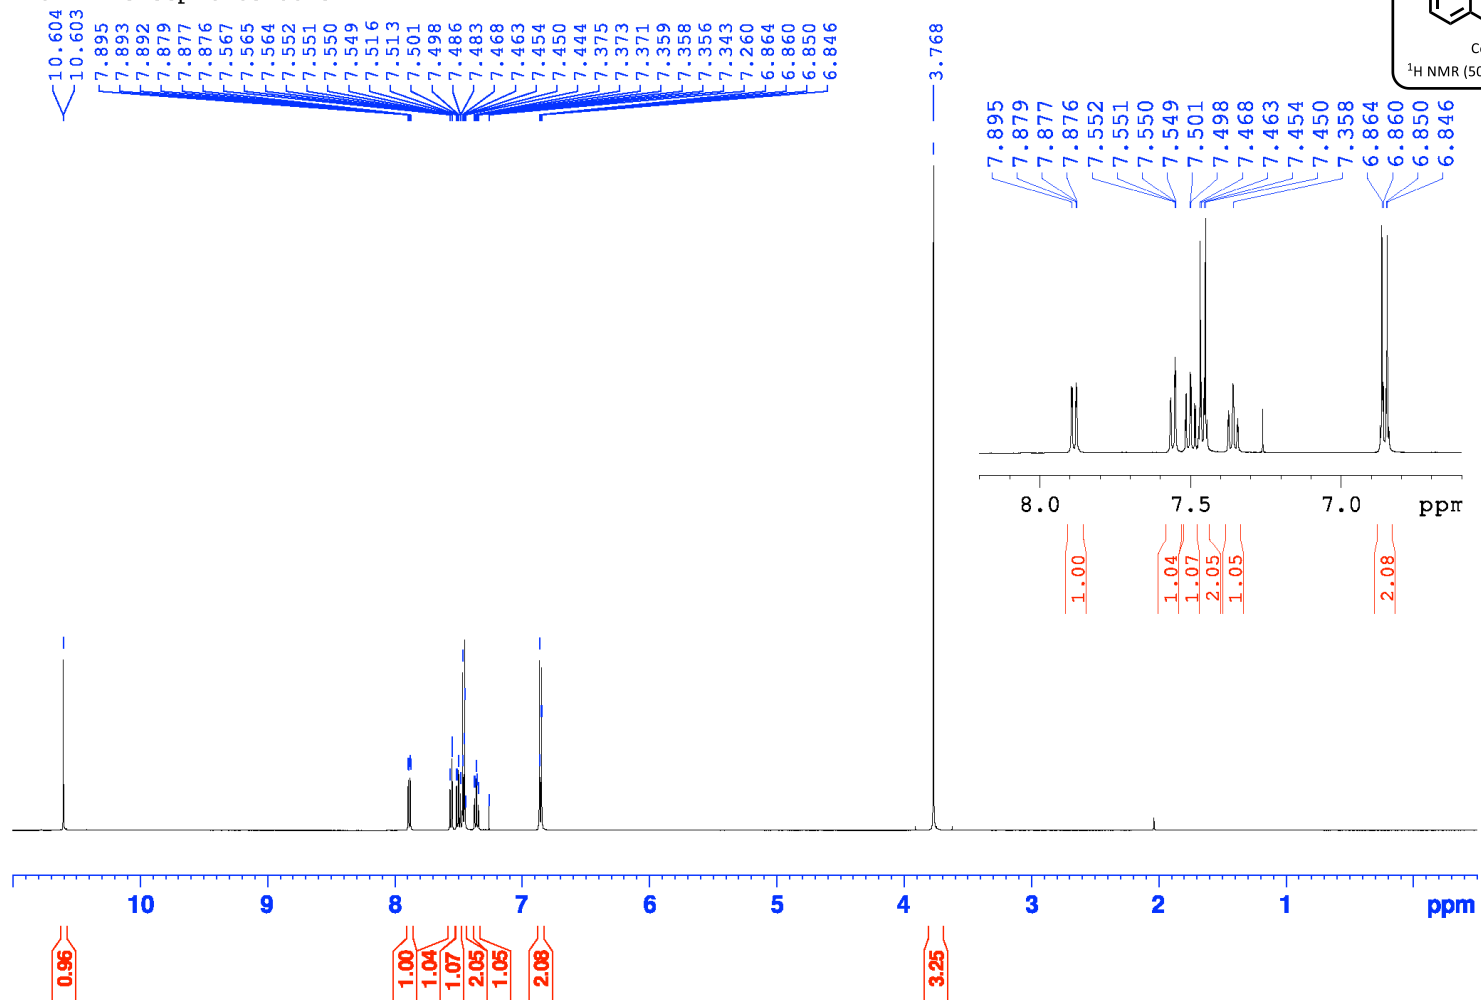

# The $^{13}\text{C}$ NMR spectrum in $\text{CDCl}_3$ of compound 2o.

13C CYL-713 sep 6768 0818

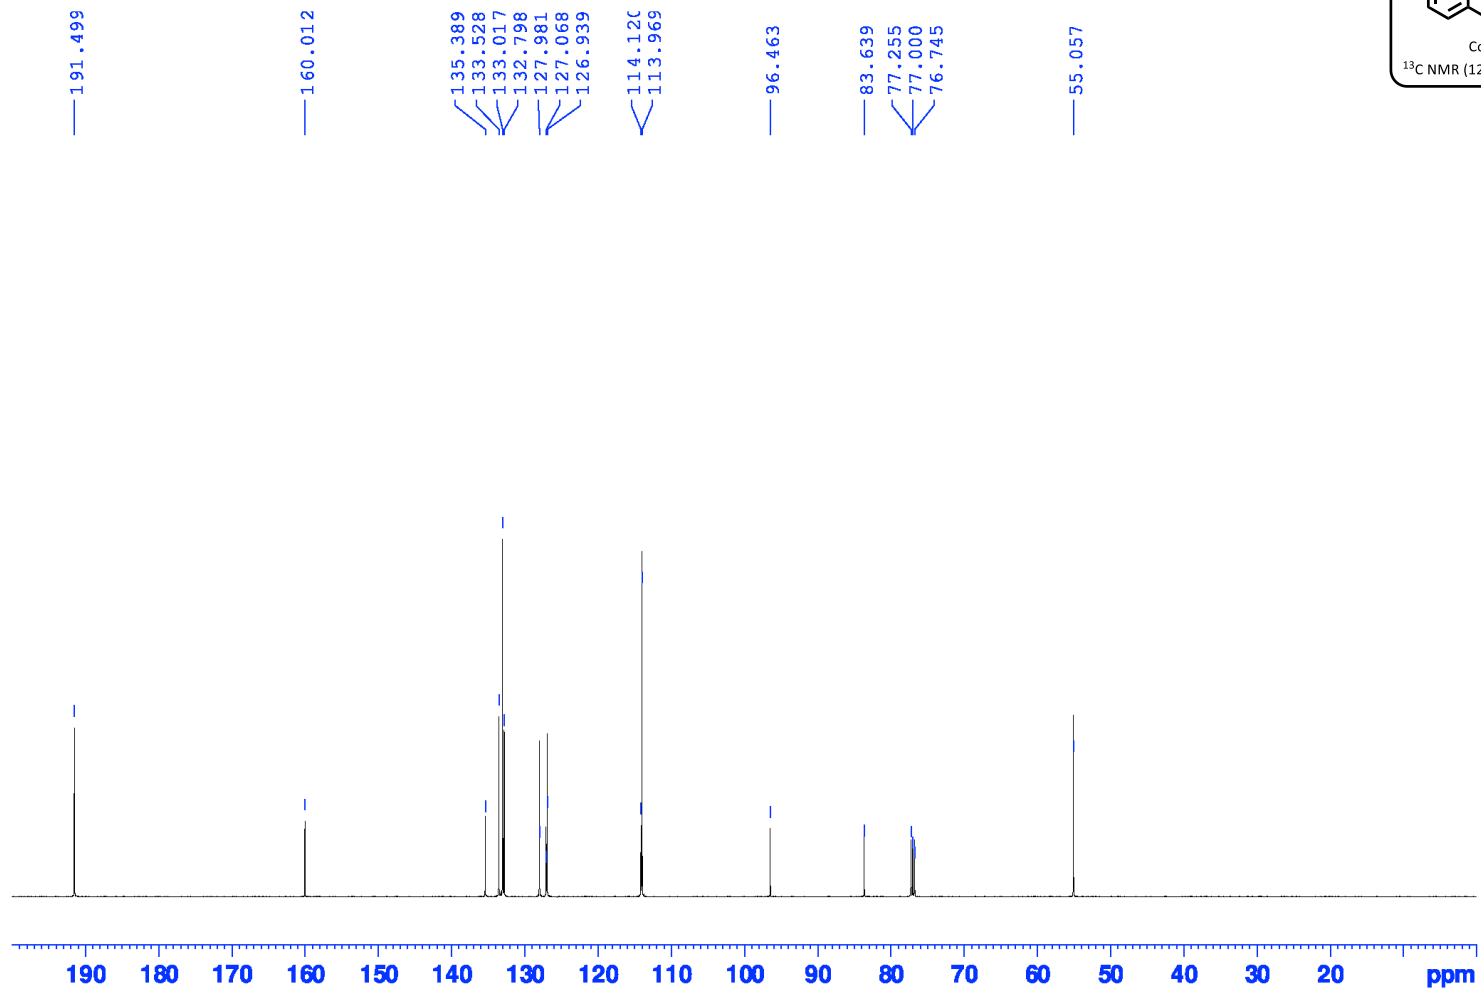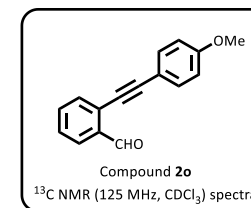



# The <sup>1</sup>H NMR spectrum in CDCl<sub>3</sub> of compound 2p.

1H CYL-714 sep 5354 0818

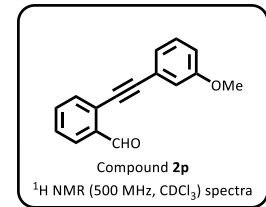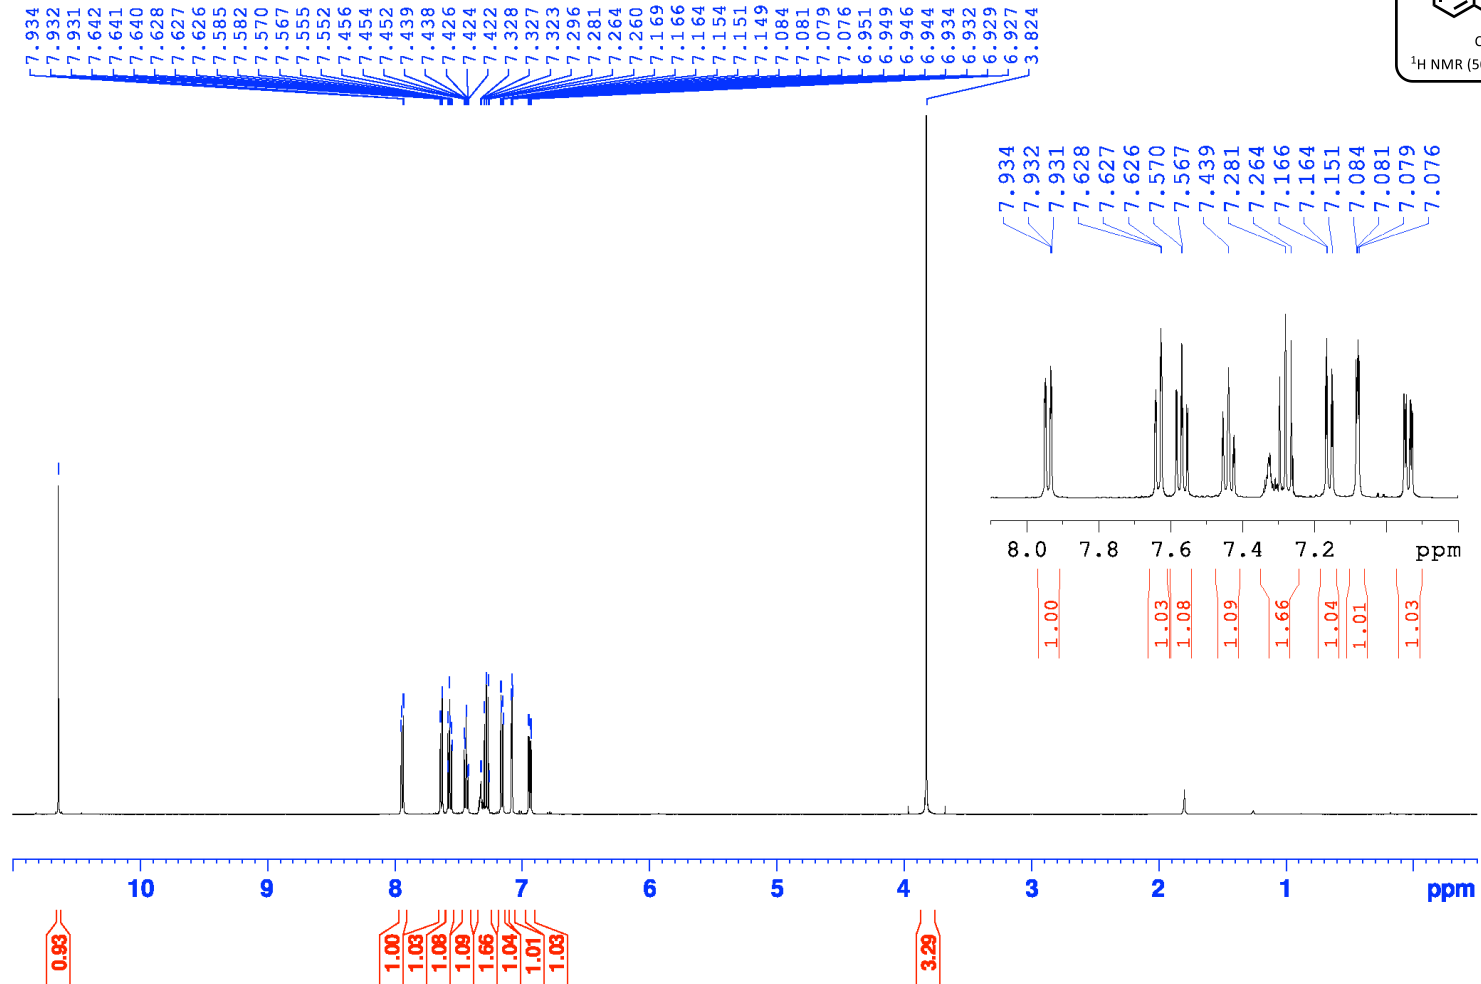

# The $^{13}\text{C}$ NMR spectrum in $\text{CDCl}_3$ of compound 2p.

13C CYL-714 sep 5354 0818

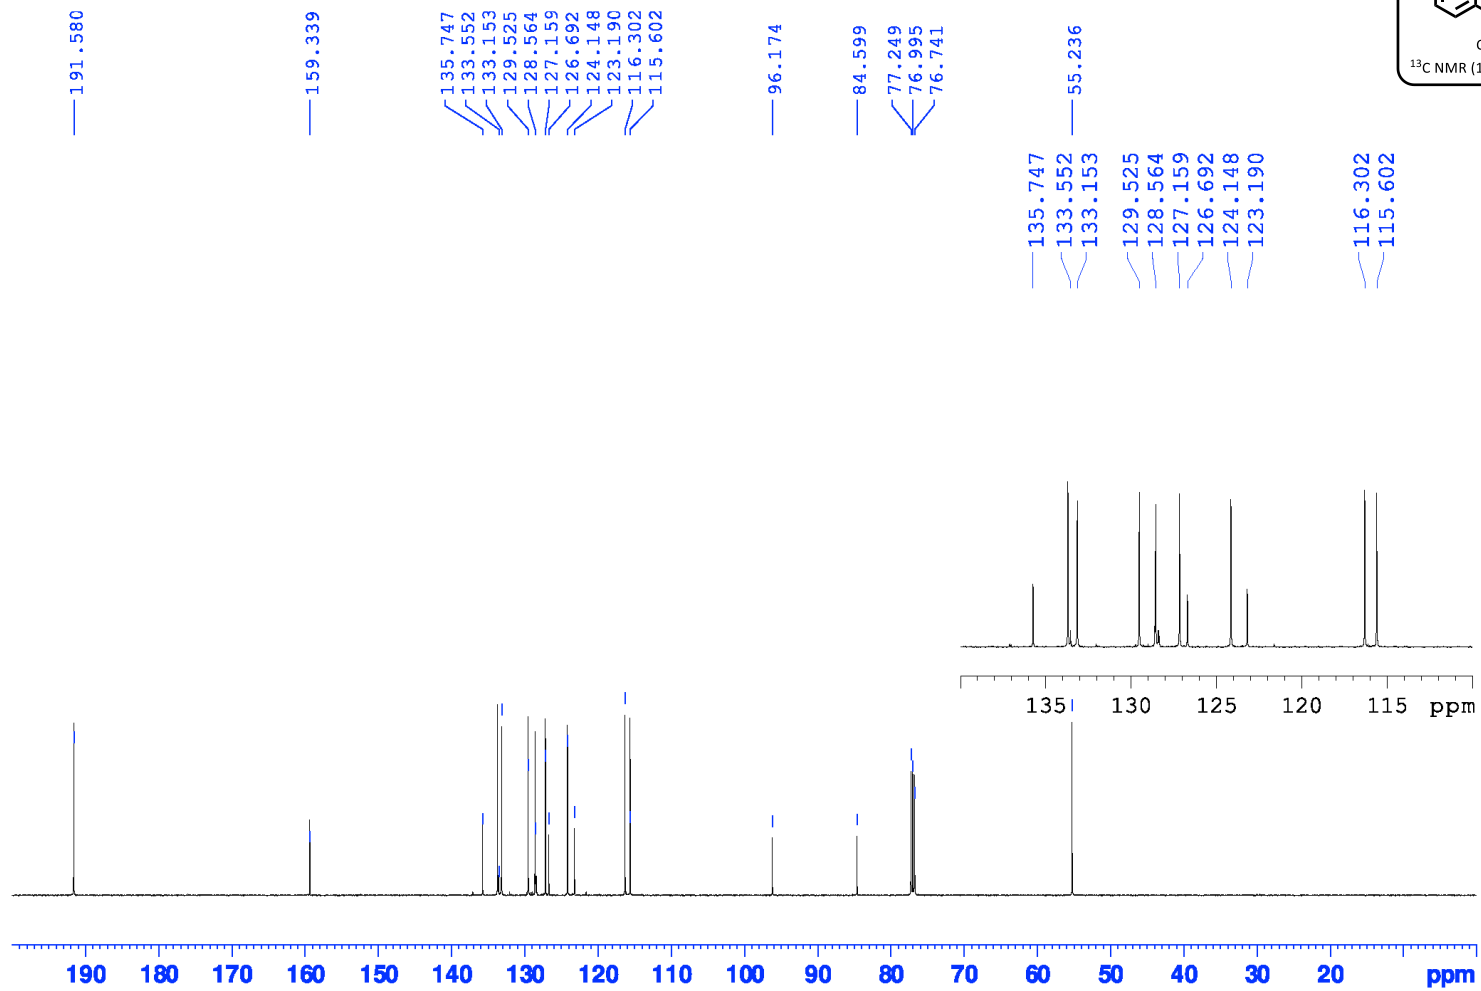

# The $^1\text{H}$ NMR spectrum in $\text{CDCl}_3$ of compound **2q**.

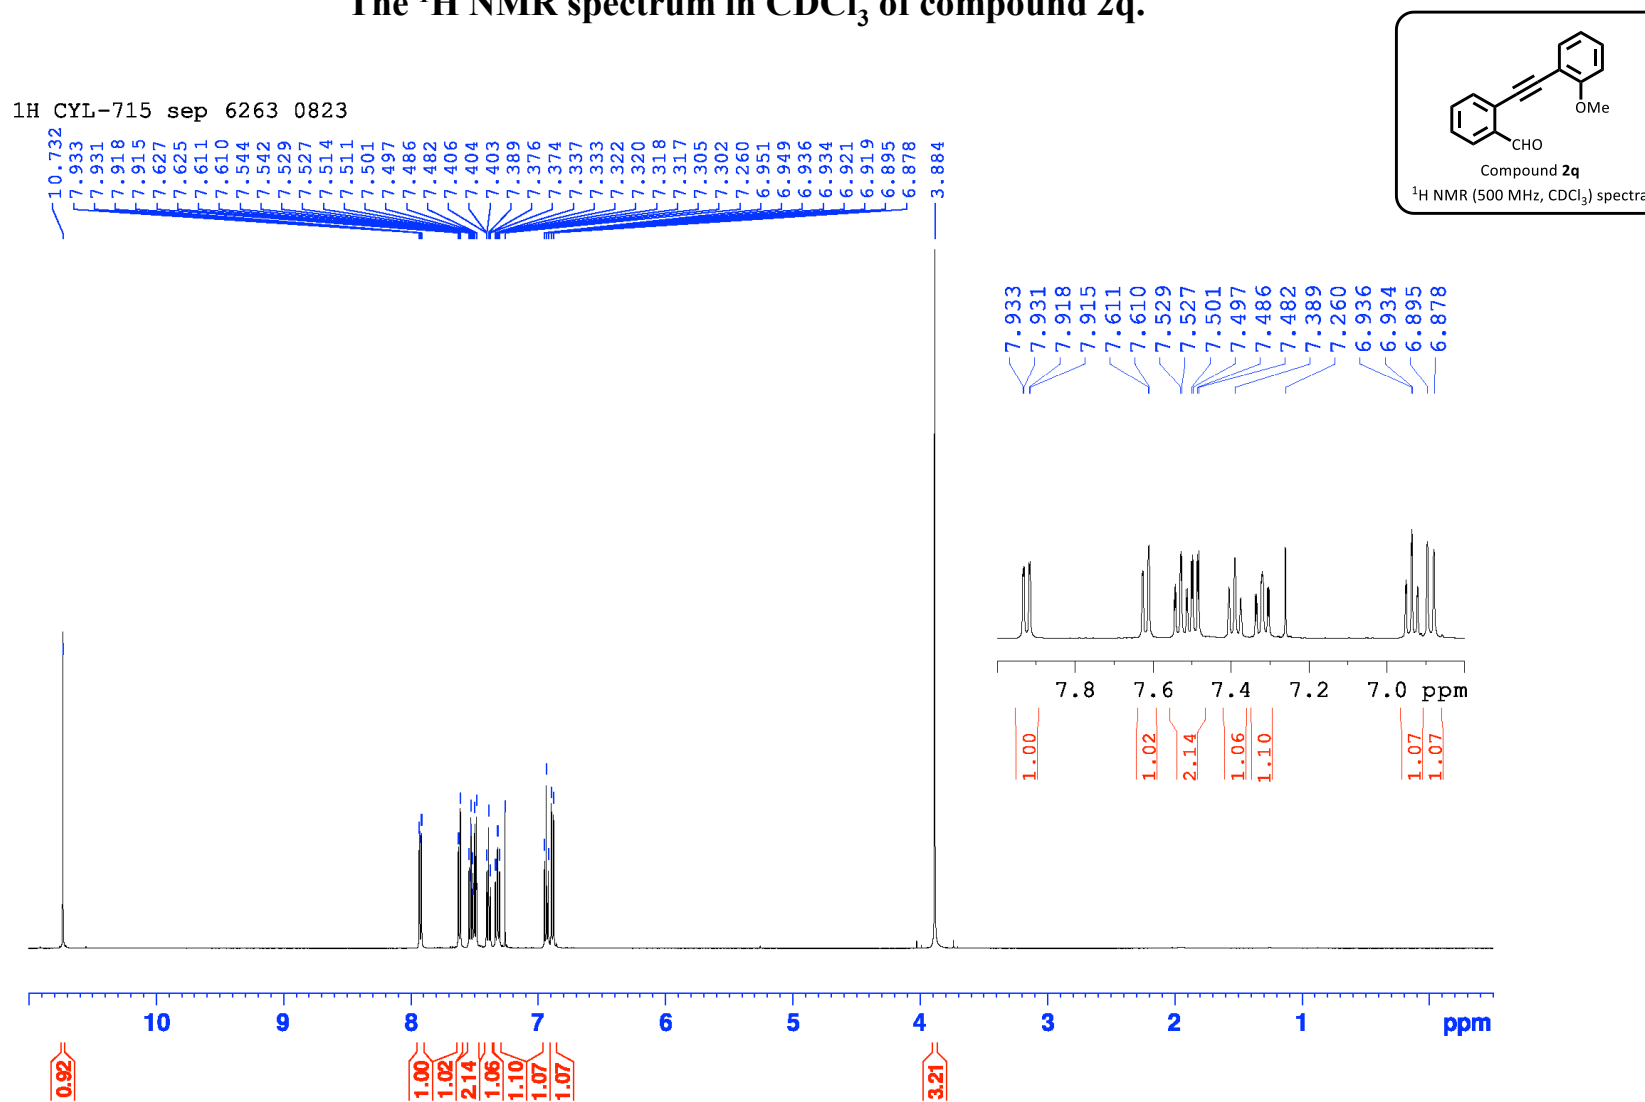

# The $^{13}\text{C}$ NMR spectrum in $\text{CDCl}_3$ of compound 2q.

13C CYL-715 sep 6263 0823

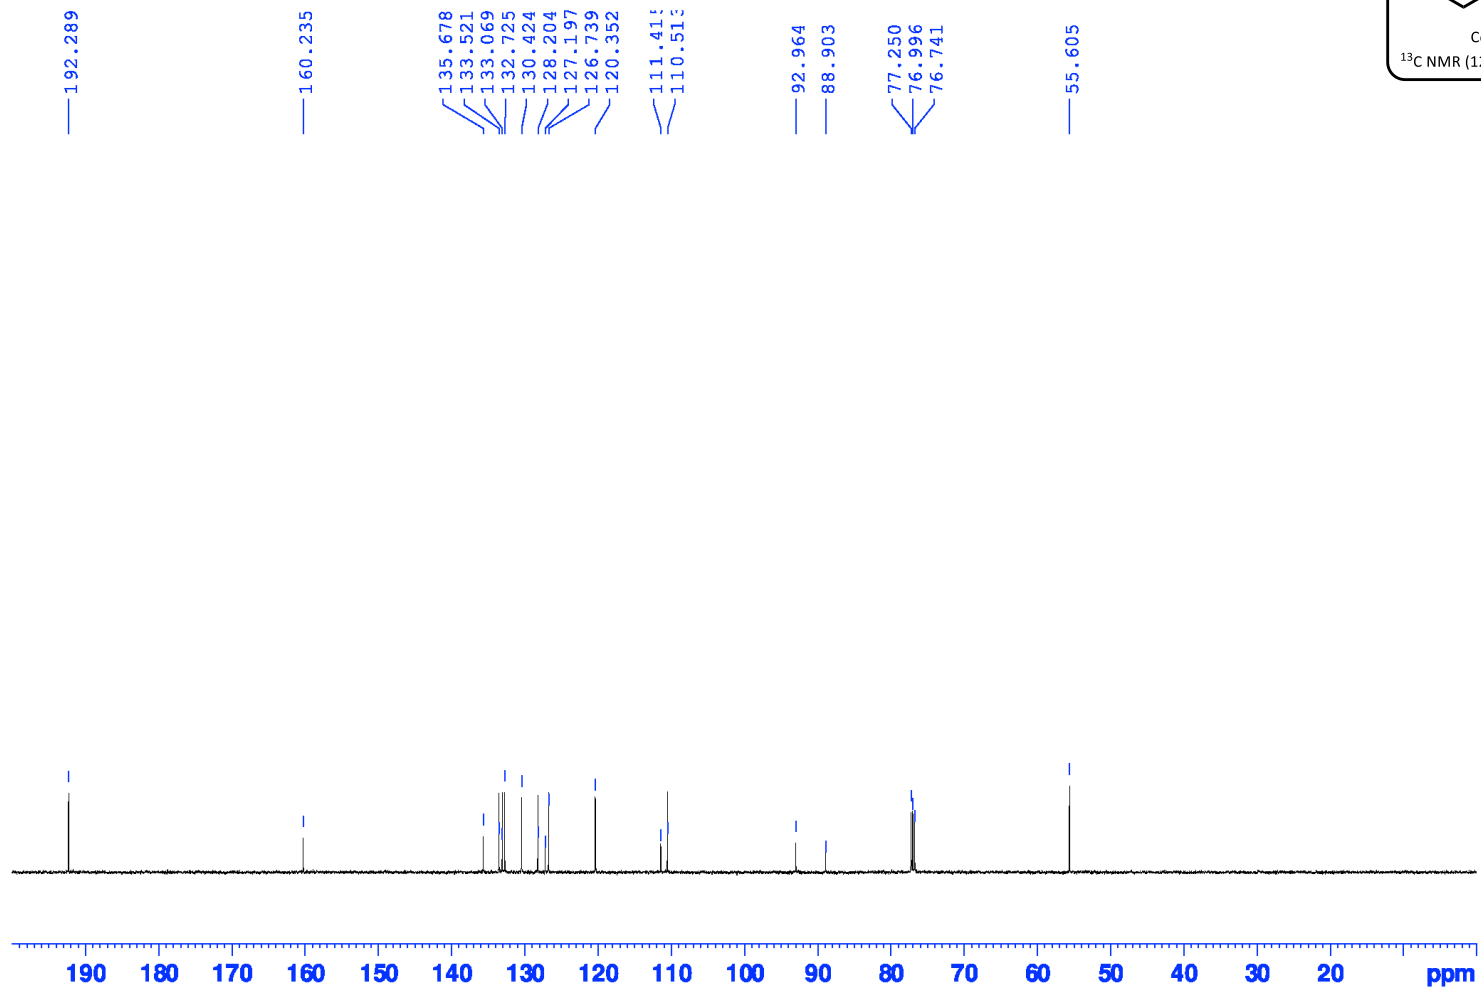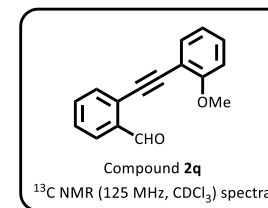

# The $^1\text{H}$ NMR spectrum in $\text{CDCl}_3$ of compound 2r.

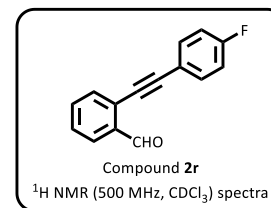

1H CYL-718 sep 91 1224

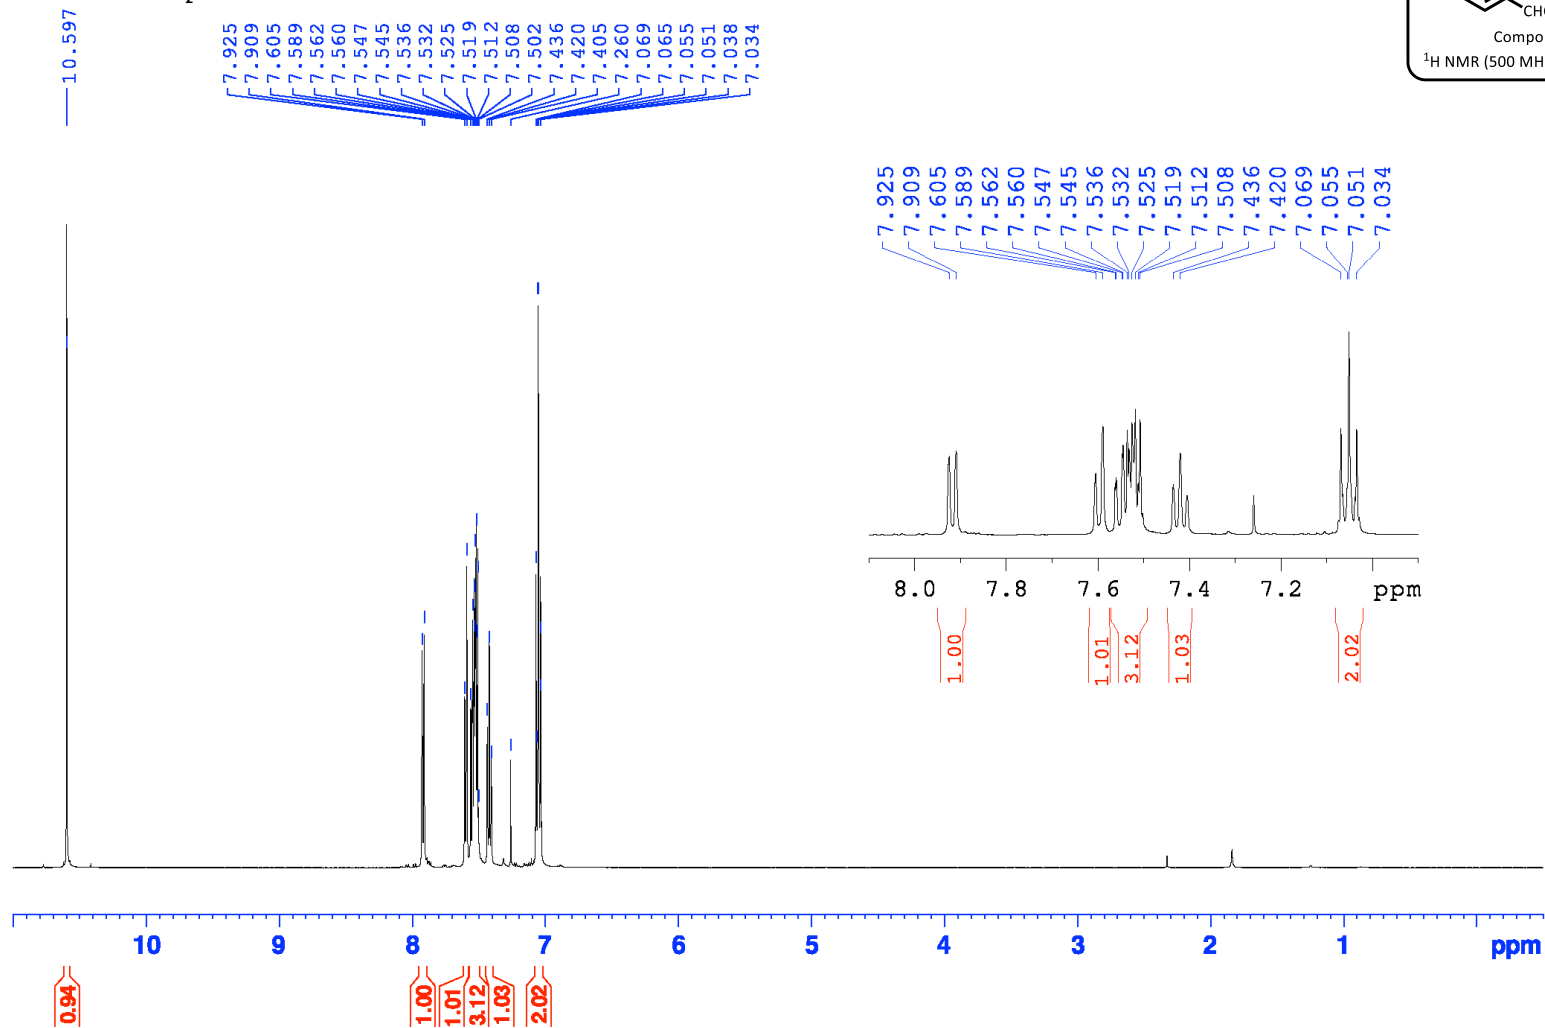

# The $^{13}\text{C}$ NMR spectrum in $\text{CDCl}_3$ of compound 2r.

13C CYL-718 sep 91 1224

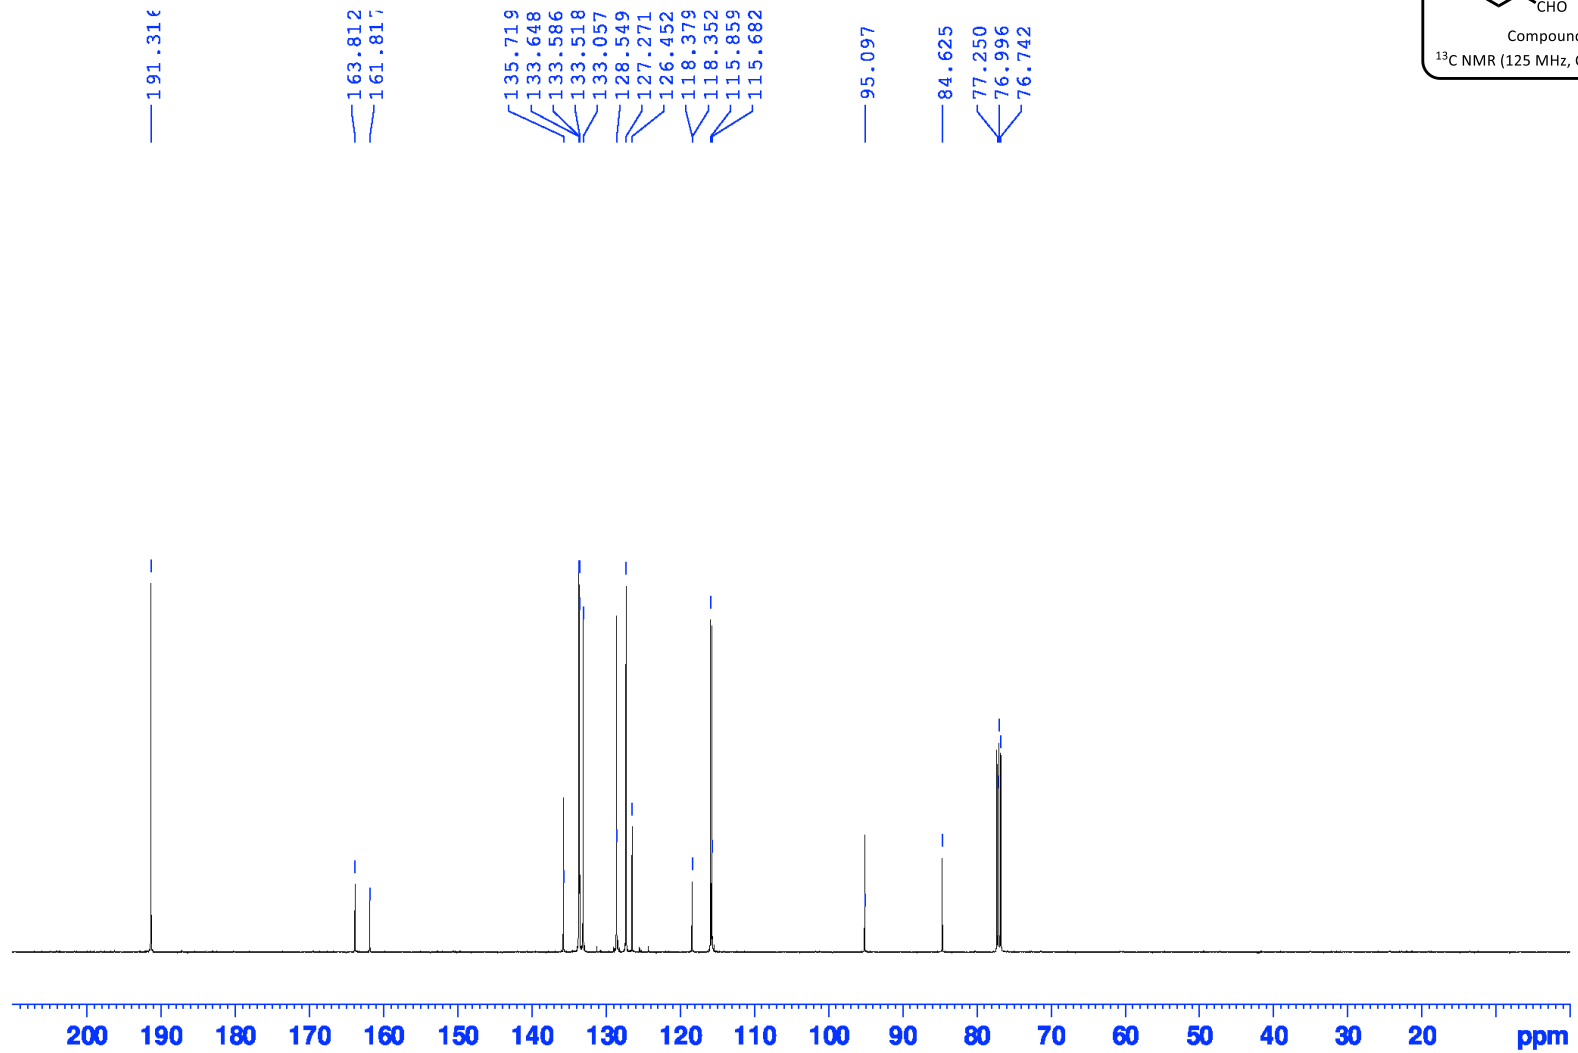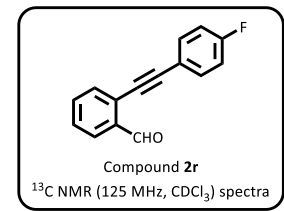

# The $^1\text{H}$ NMR spectrum in $\text{CDCl}_3$ of compound 2s.

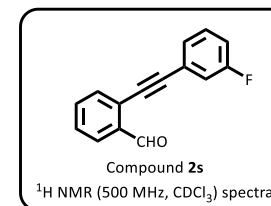

$^1\text{H}$  CYL-719 sep 79 1227

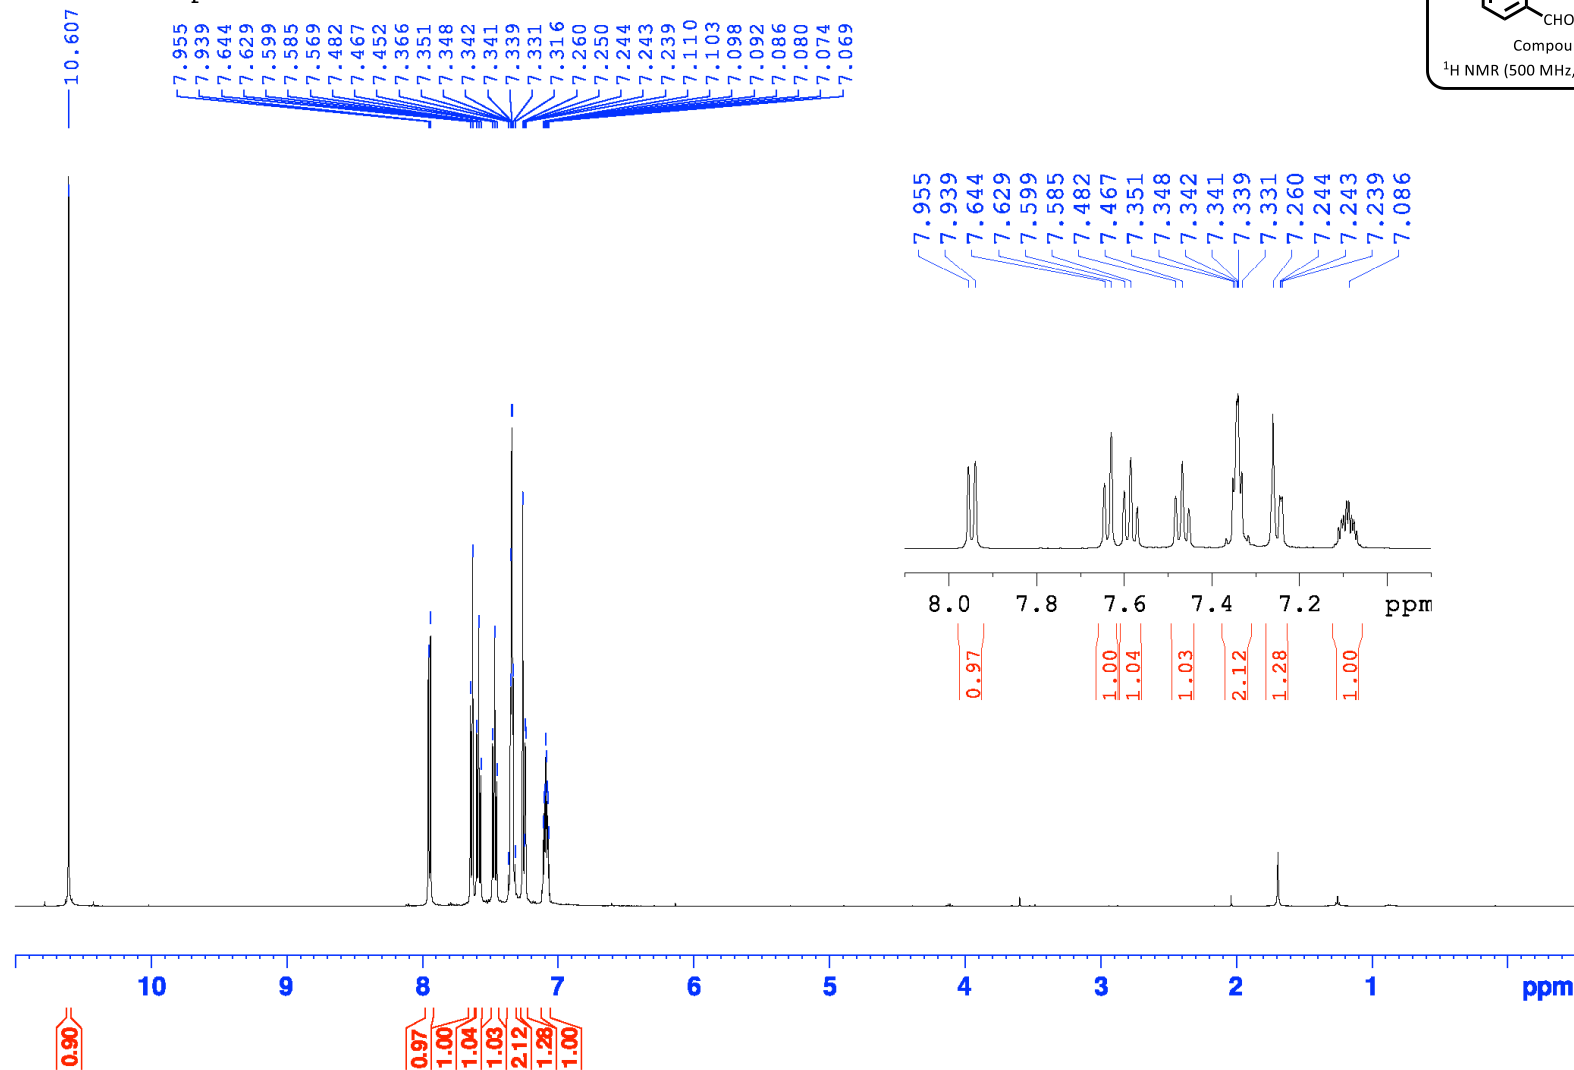

The  $^{13}\text{C}$  NMR spectrum in  $\text{CDCl}_3$  of compound **2s**.

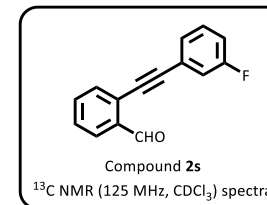

13C CYL-719 sep 79 1227

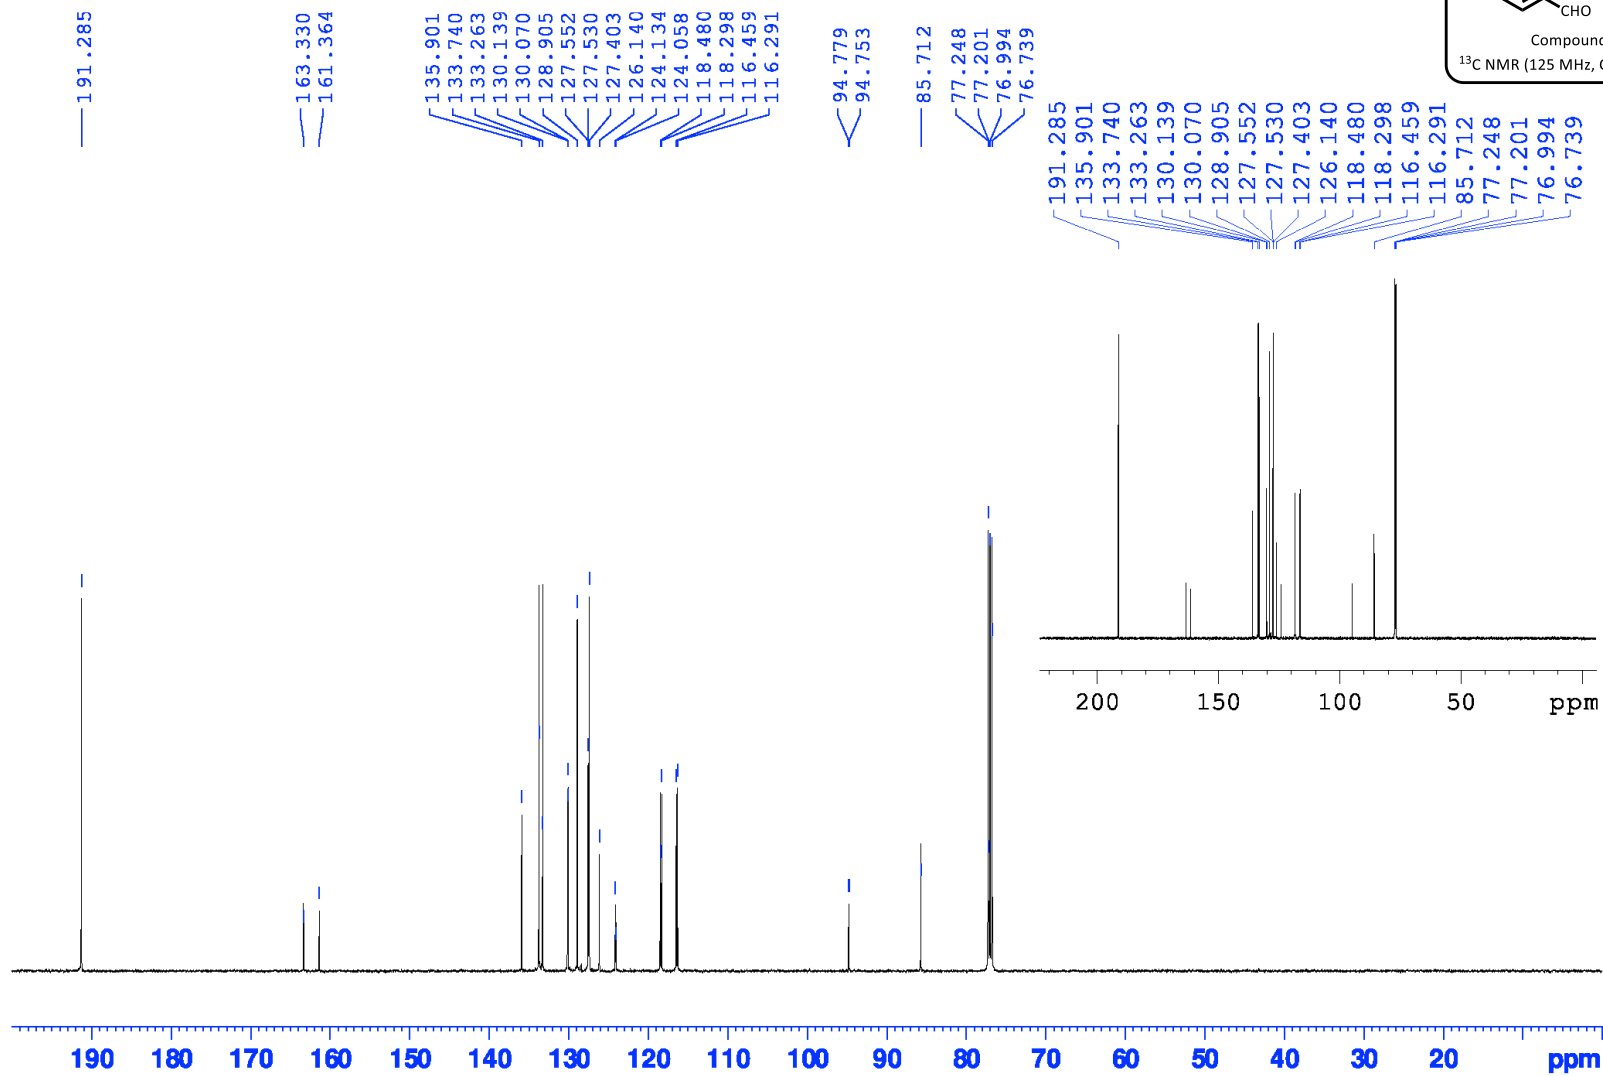



# The $^1\text{H}$ NMR spectrum in $\text{CDCl}_3$ of compound 2t.

1H CYL-720 sep 37 1228

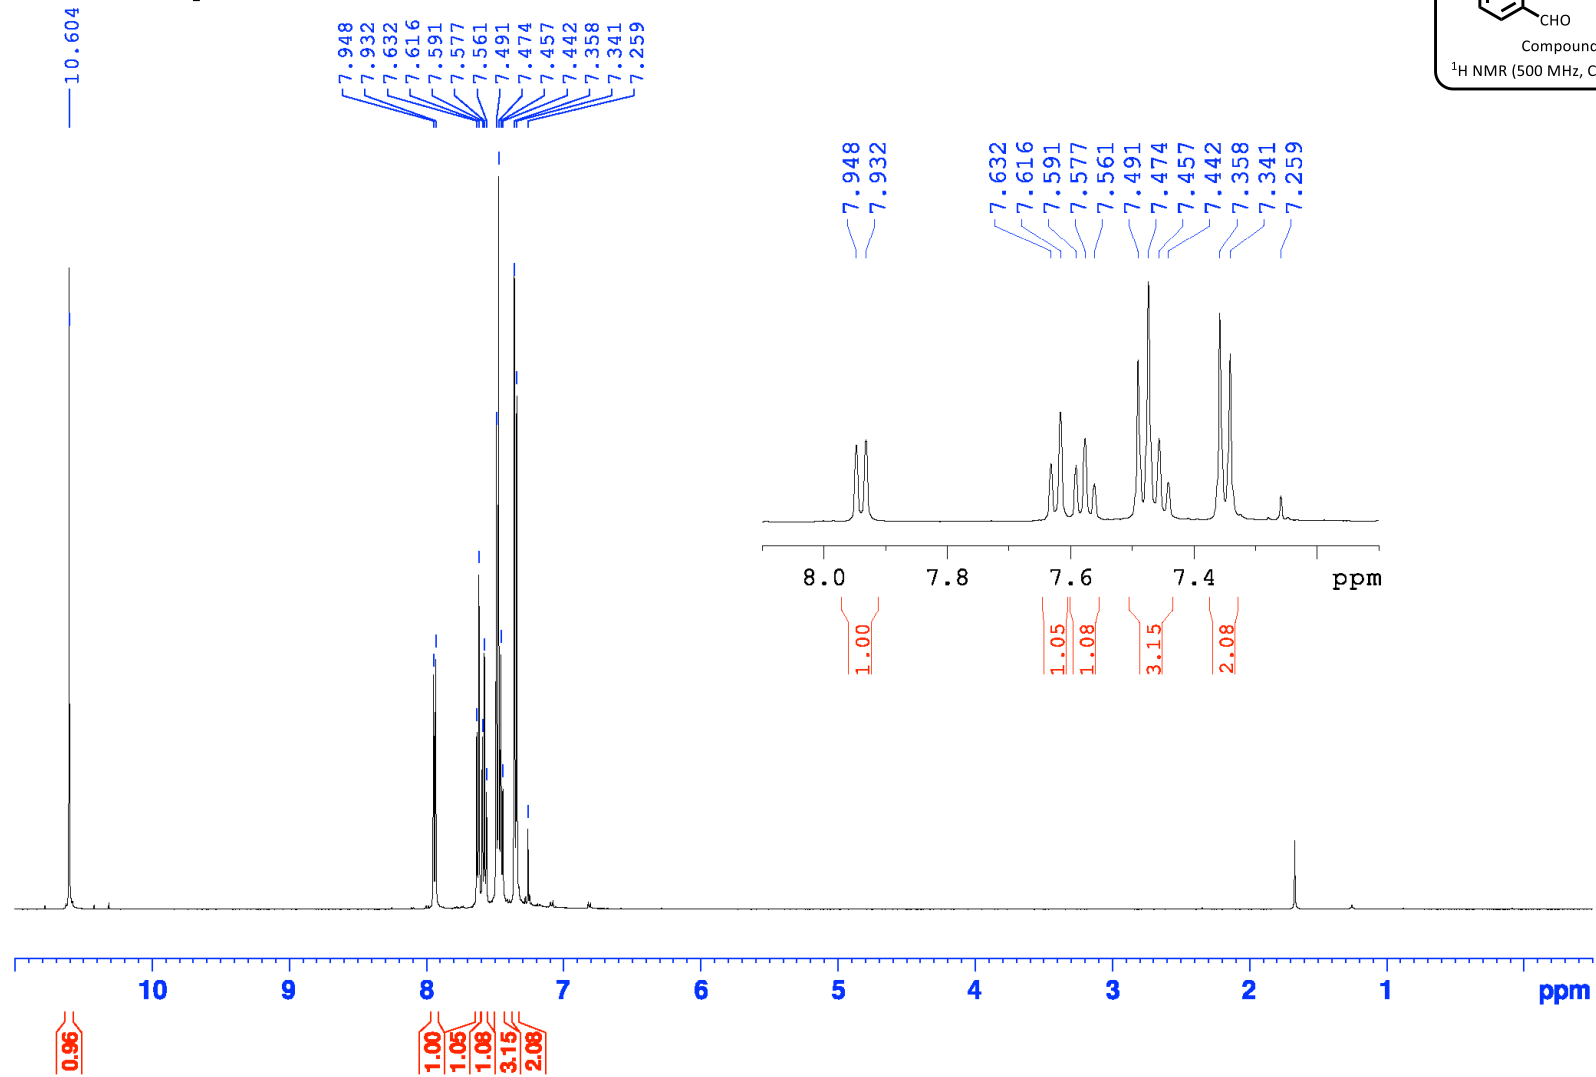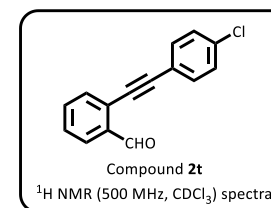

# The $^{13}\text{C}$ NMR spectrum in $\text{CDCl}_3$ of compound 2t.

$^{13}\text{C}$  CYL-720 sep 37 1228

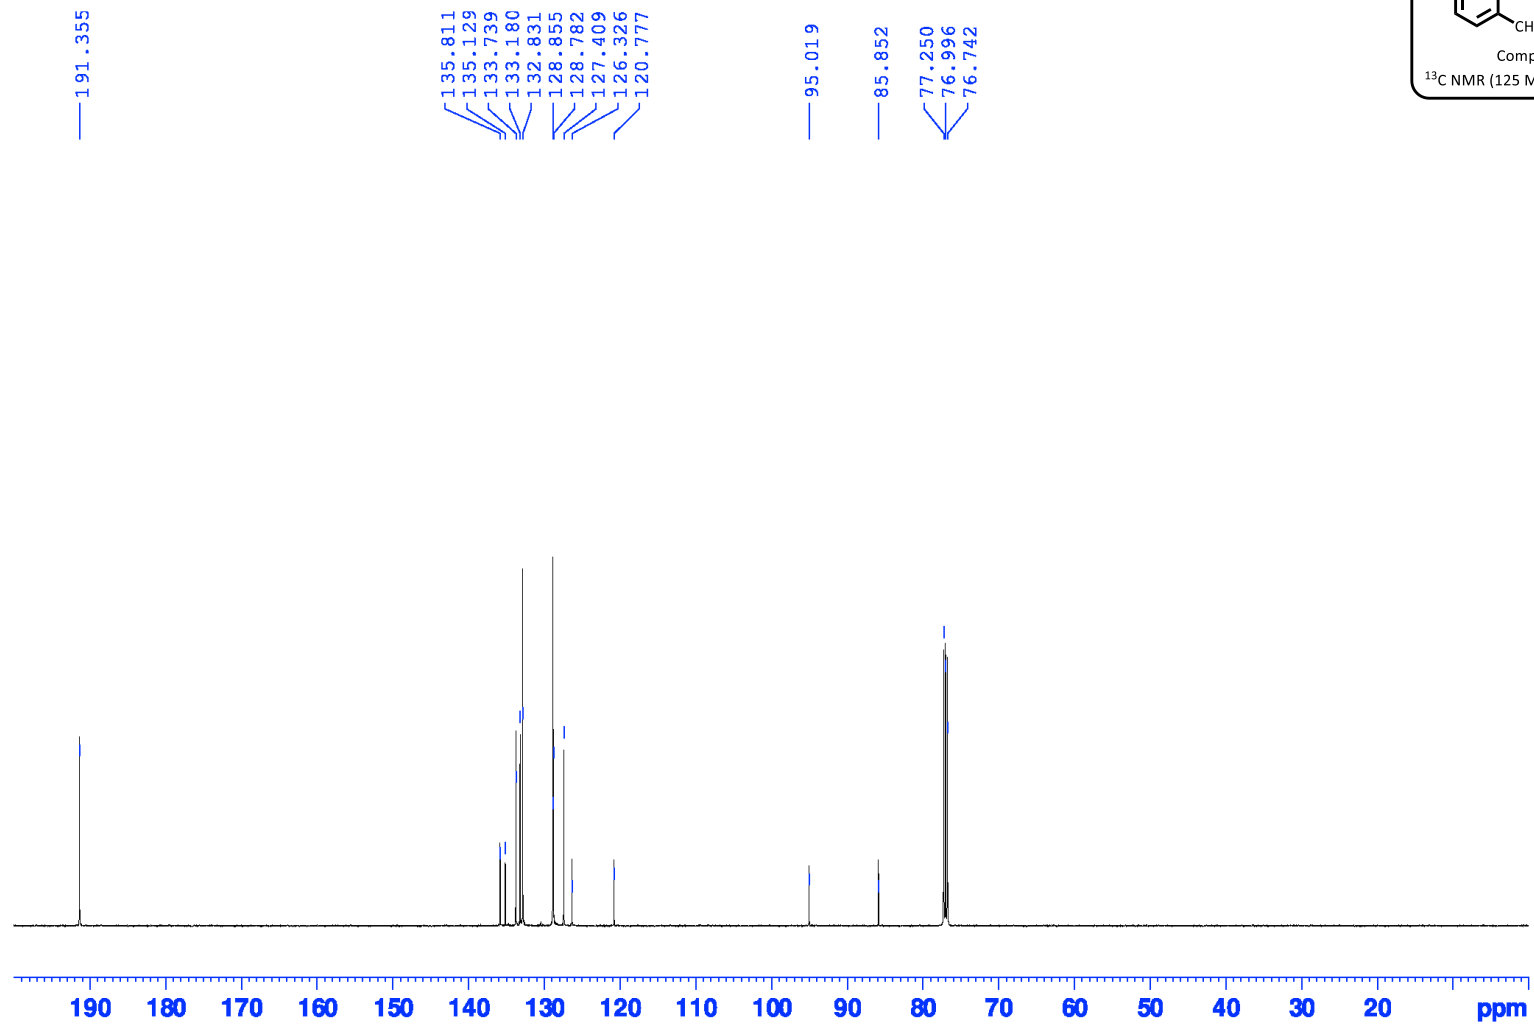

1H CYL-721 sep 53 1230

### The <sup>1</sup>H NMR spectrum in CDCl<sub>3</sub> of compound 2u.

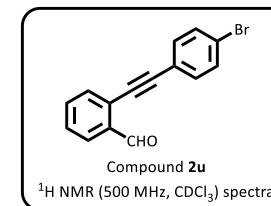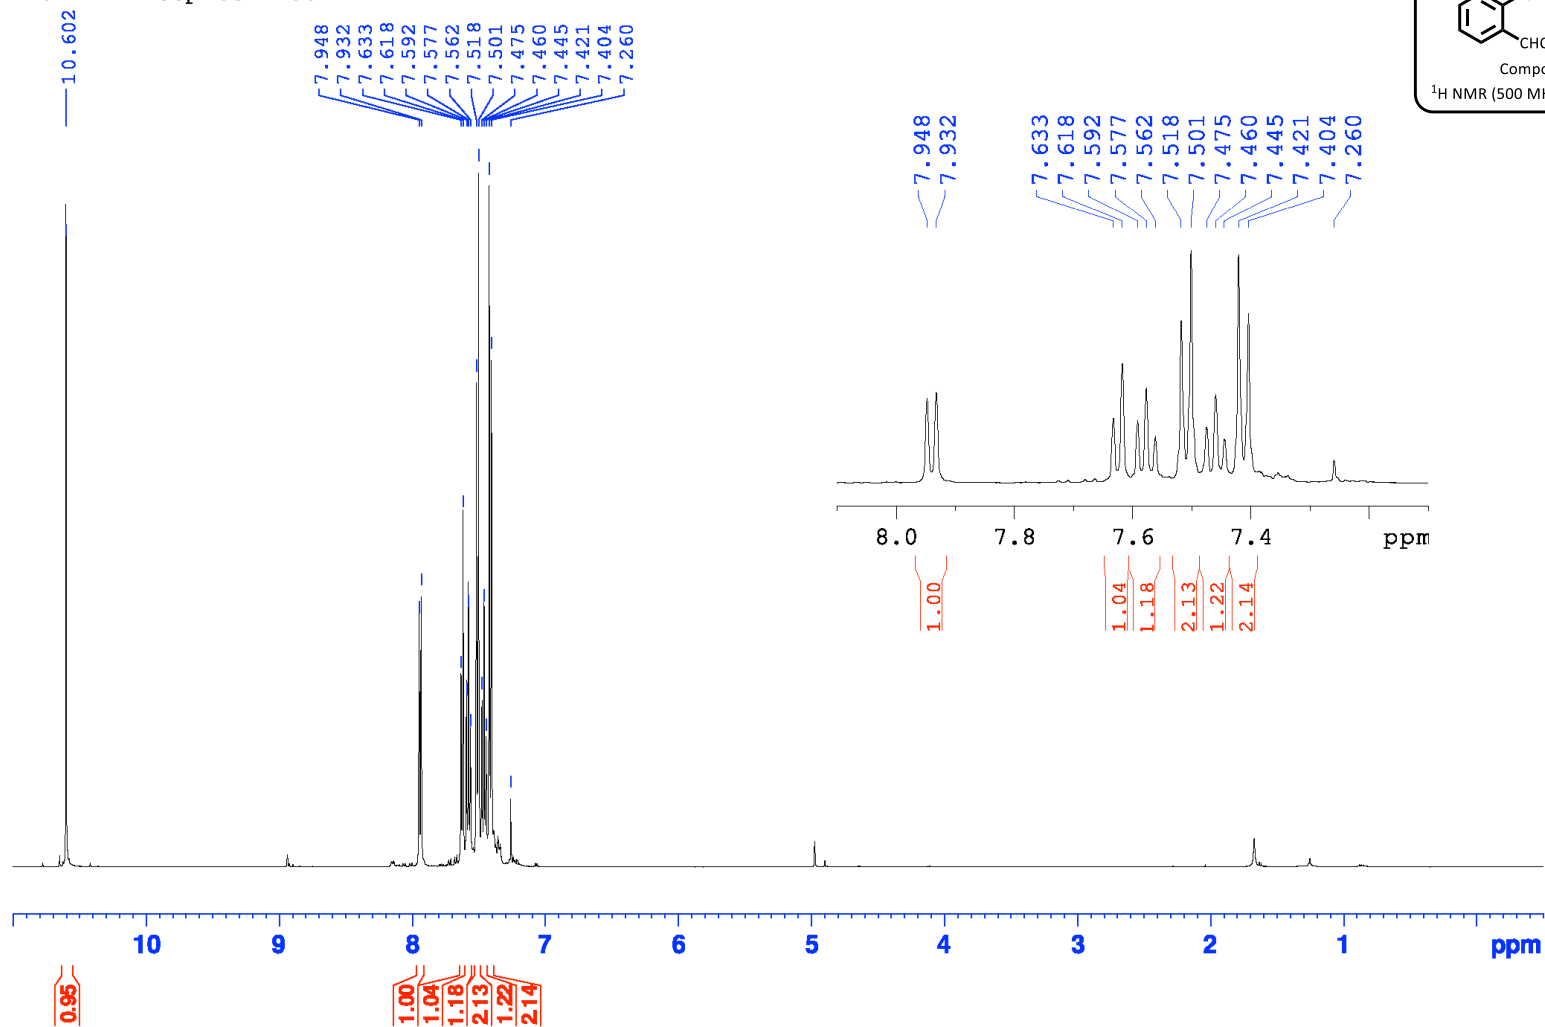

# The $^{13}\text{C}$ NMR spectrum in $\text{CDCl}_3$ of compound 2u.

13C CYL-721 sep 53 1230

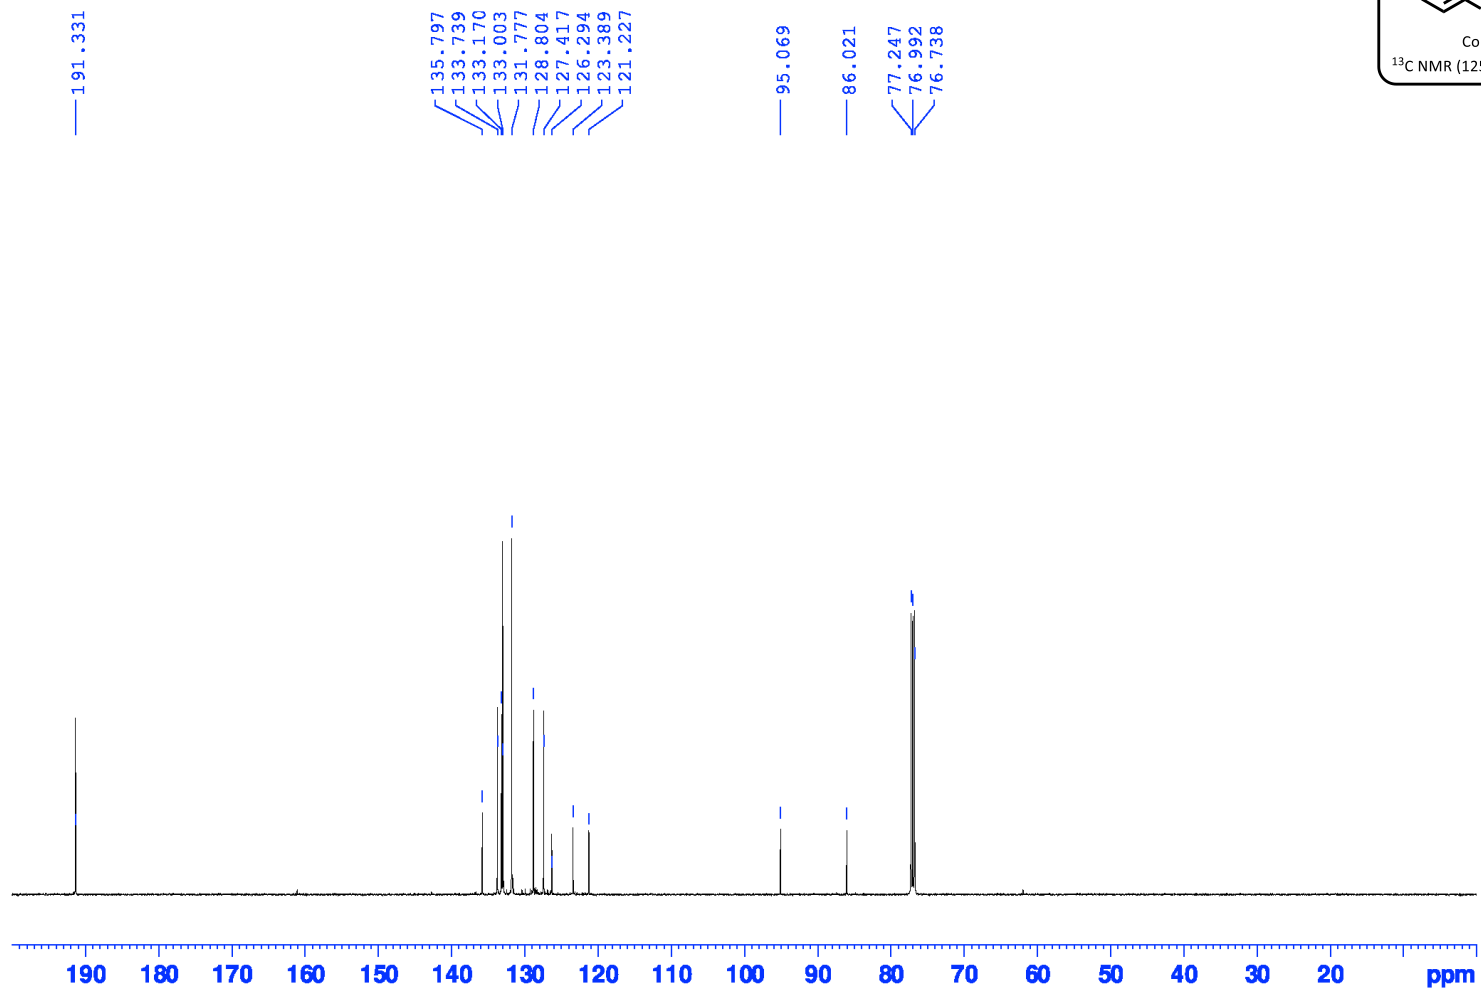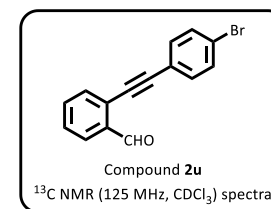

# The <sup>1</sup>H NMR spectrum in CDCl<sub>3</sub> of compound 2v.

1H CYL-723 sep 16 0103

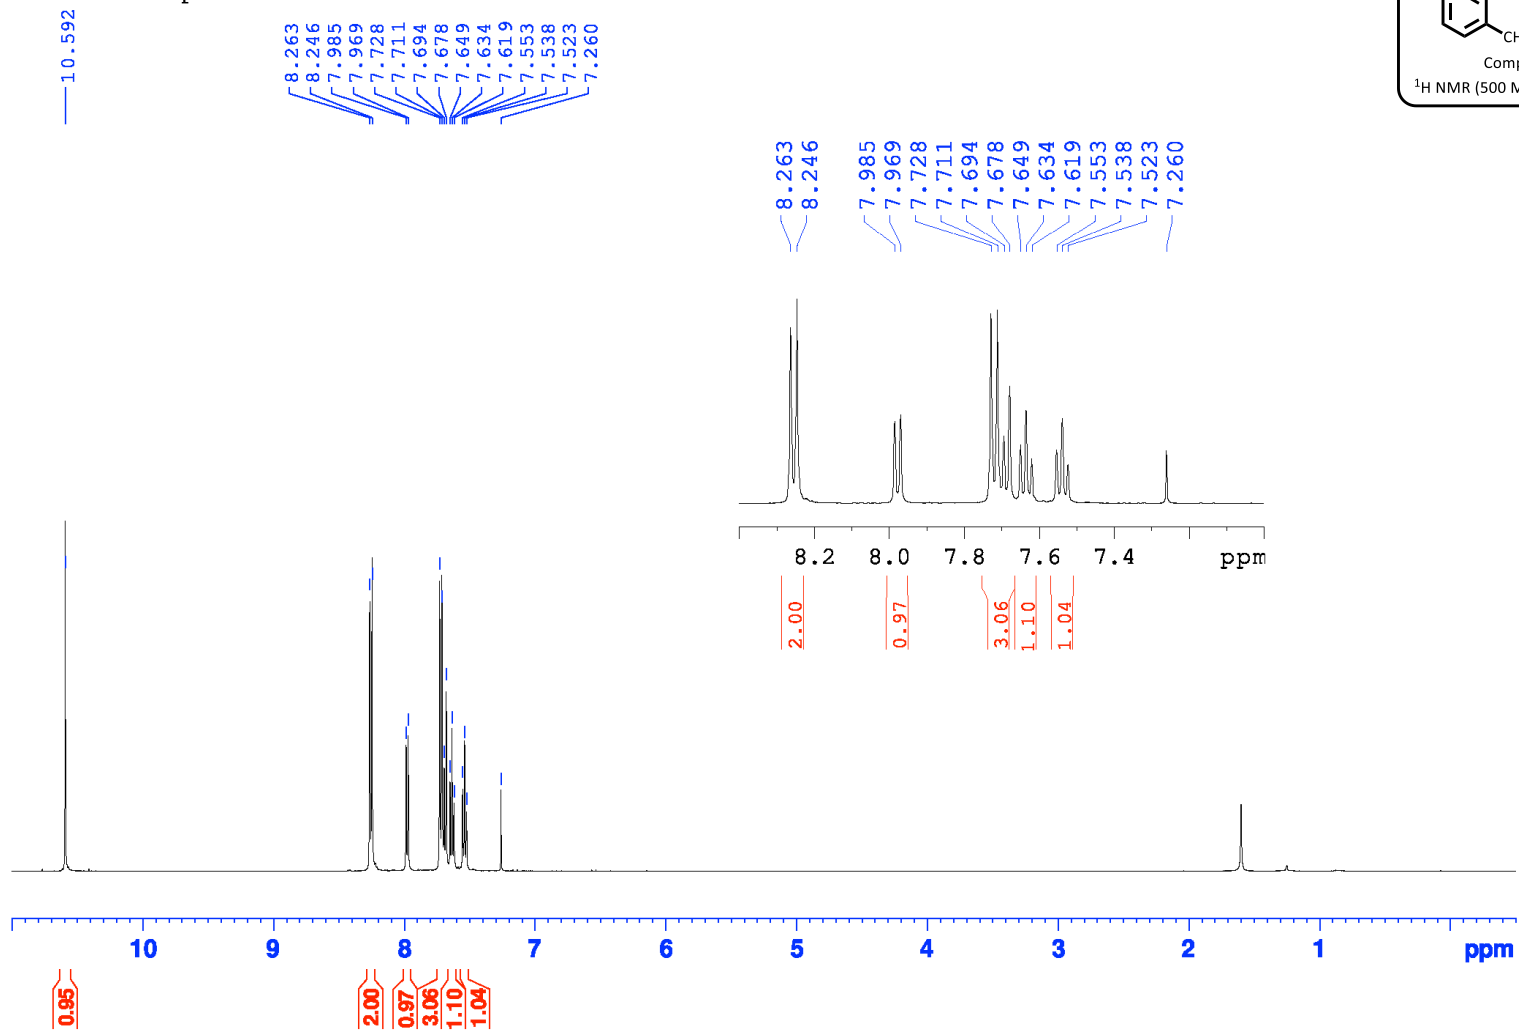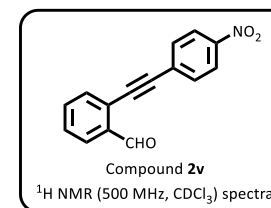

13C CYL-723 sep 16 0103

### The $^{13}\text{C}$ NMR spectrum in $\text{CDCl}_3$ of compound 2v.

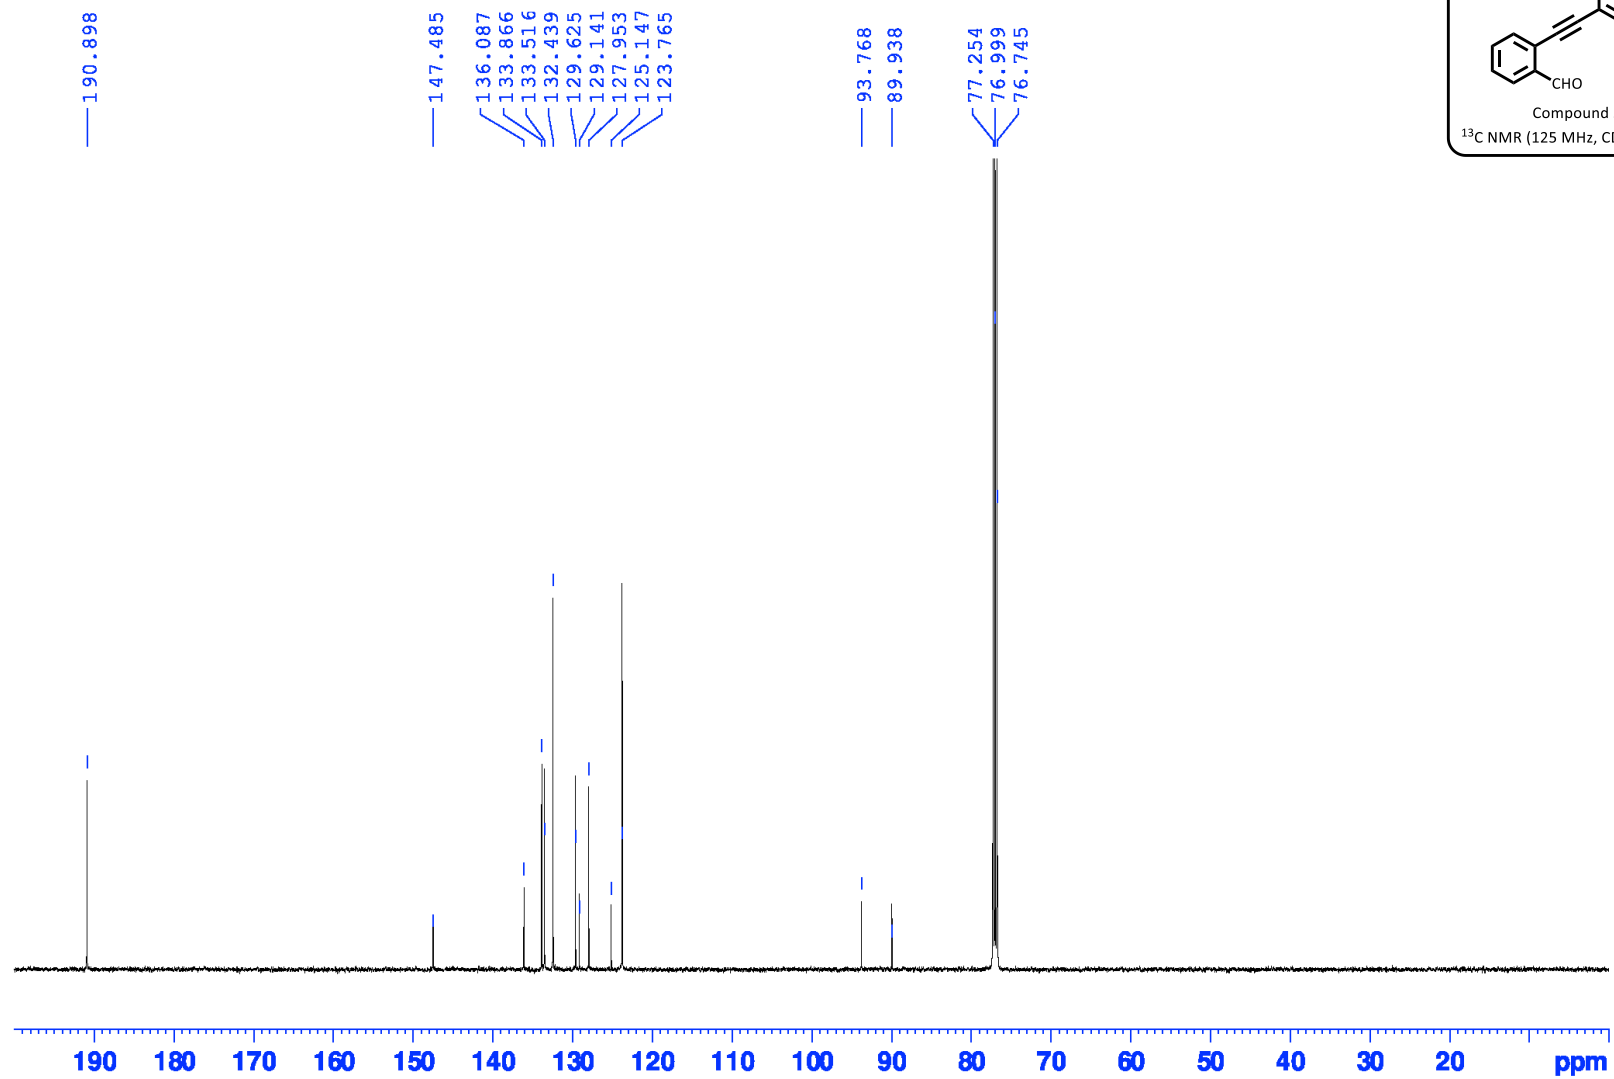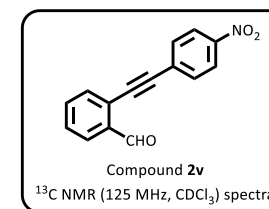

# The $^1\text{H}$ NMR spectrum in $\text{CDCl}_3$ of compound 2w.

1H CYL-725 sep 3940 0107

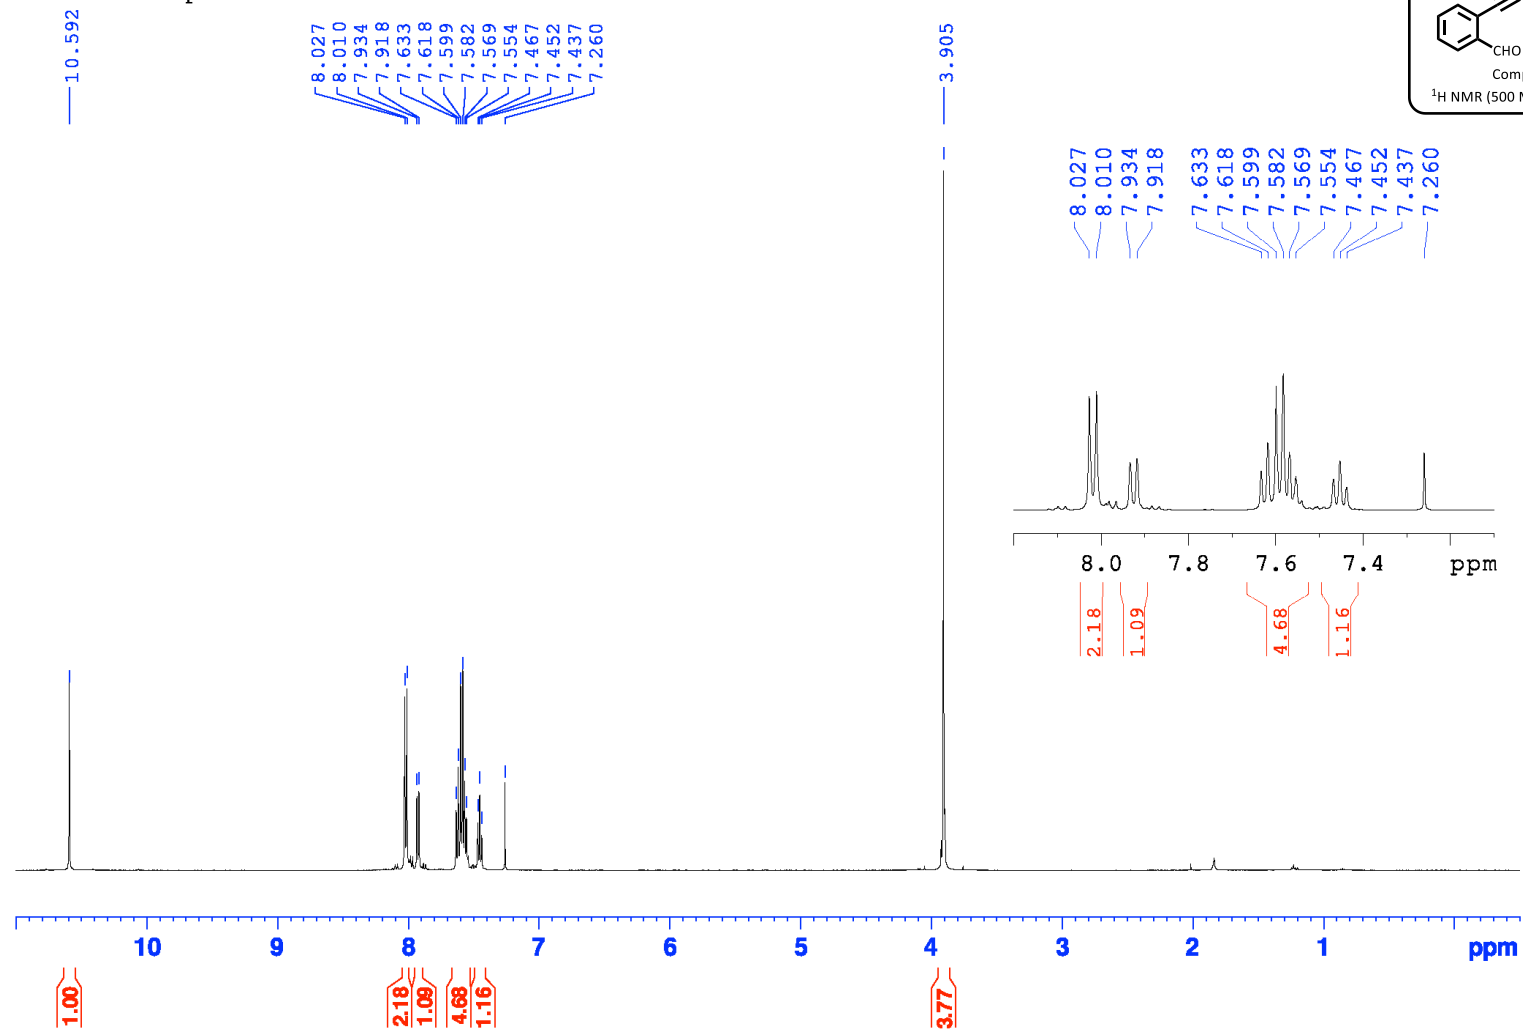

# The $^{13}\text{C}$ NMR spectrum in $\text{CDCl}_3$ of compound 2w.

13C CYL-725 sep 3940 0107

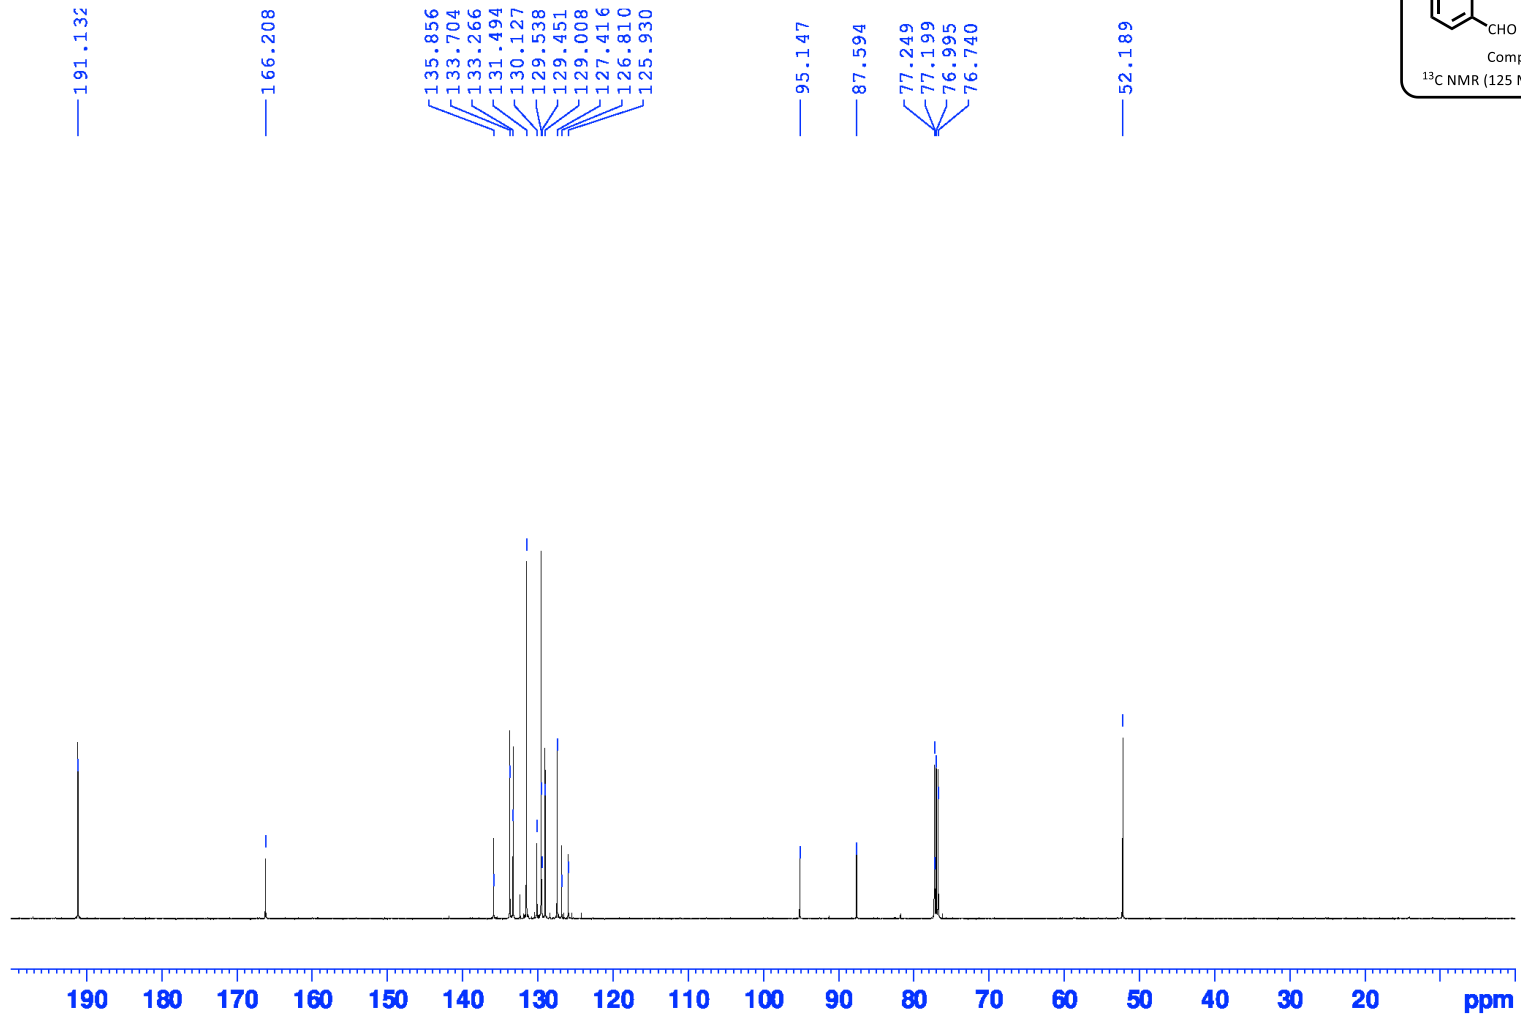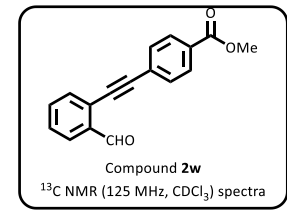



# The $^1\text{H}$ NMR spectrum in $\text{CDCl}_3$ of compound 2x.

1H CYL-727 sep 50 0111

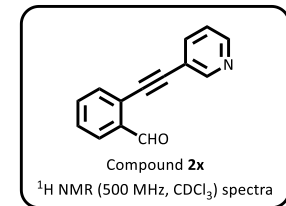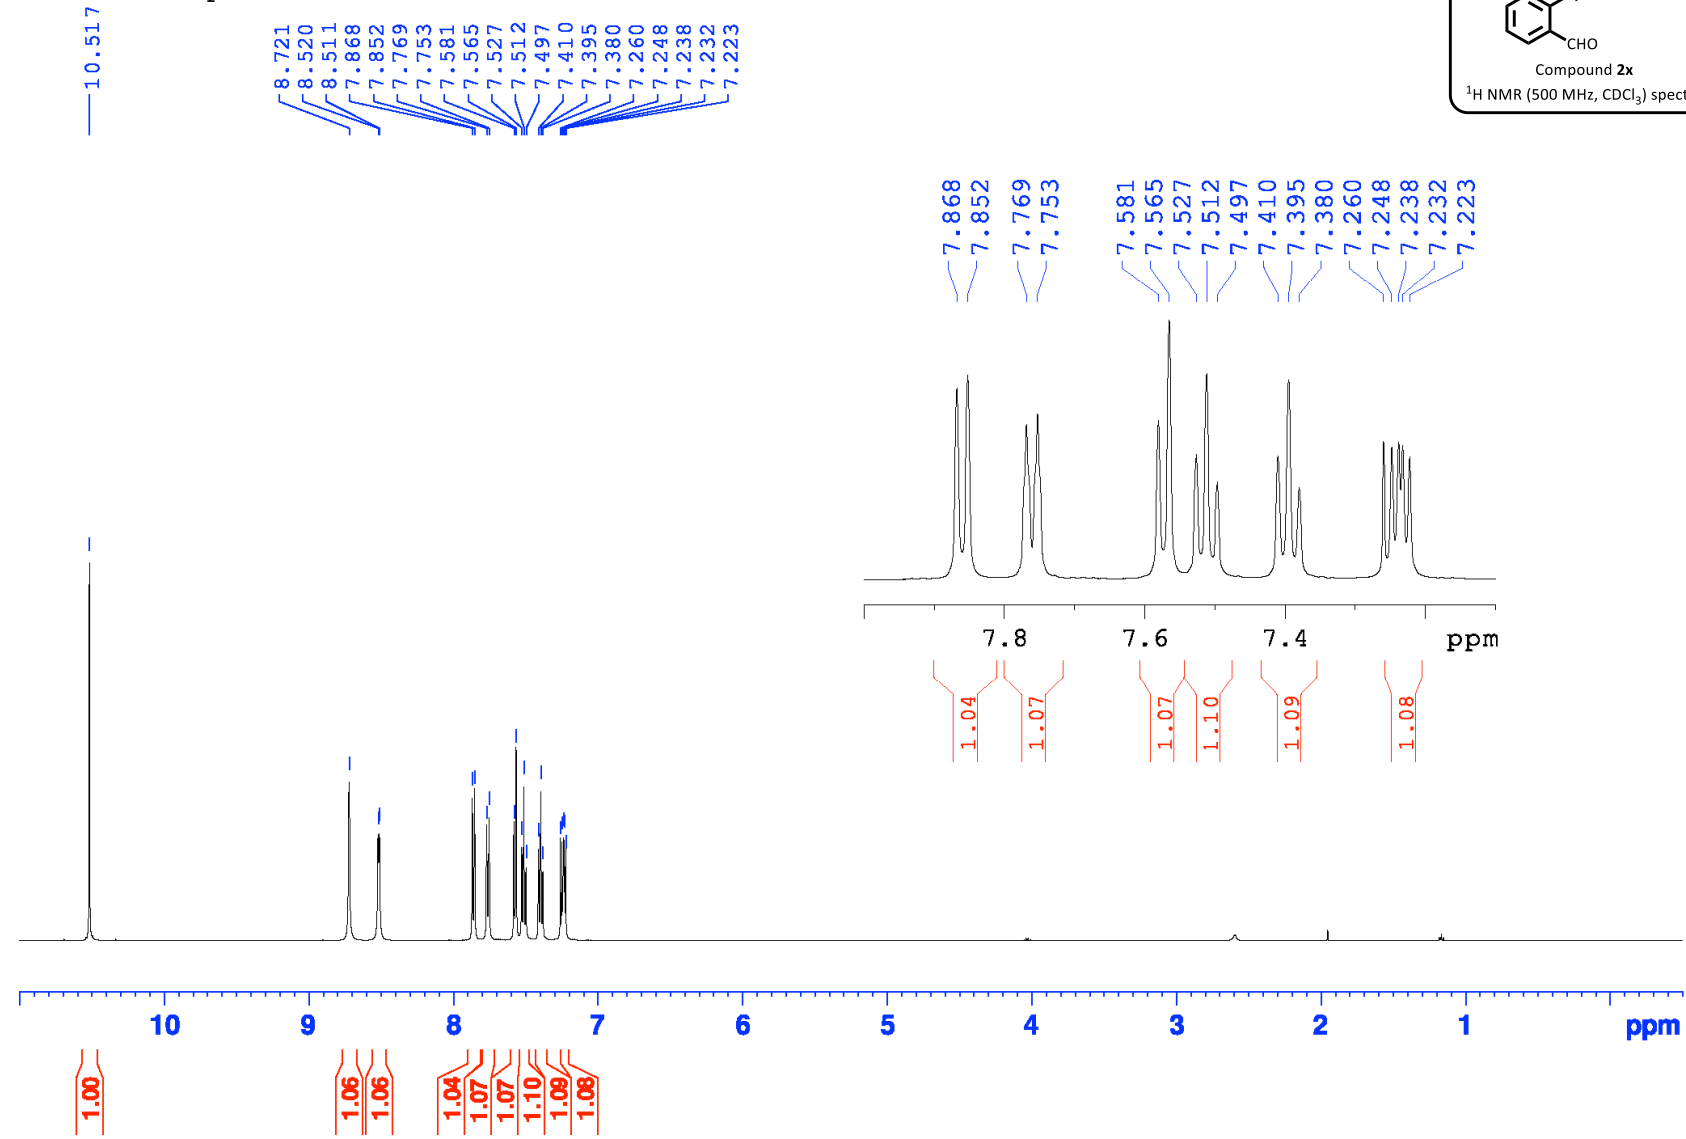

# The $^{13}\text{C}$ NMR spectrum in $\text{CDCl}_3$ of compound **2x**.

13C CYL-727 sep 50 0111

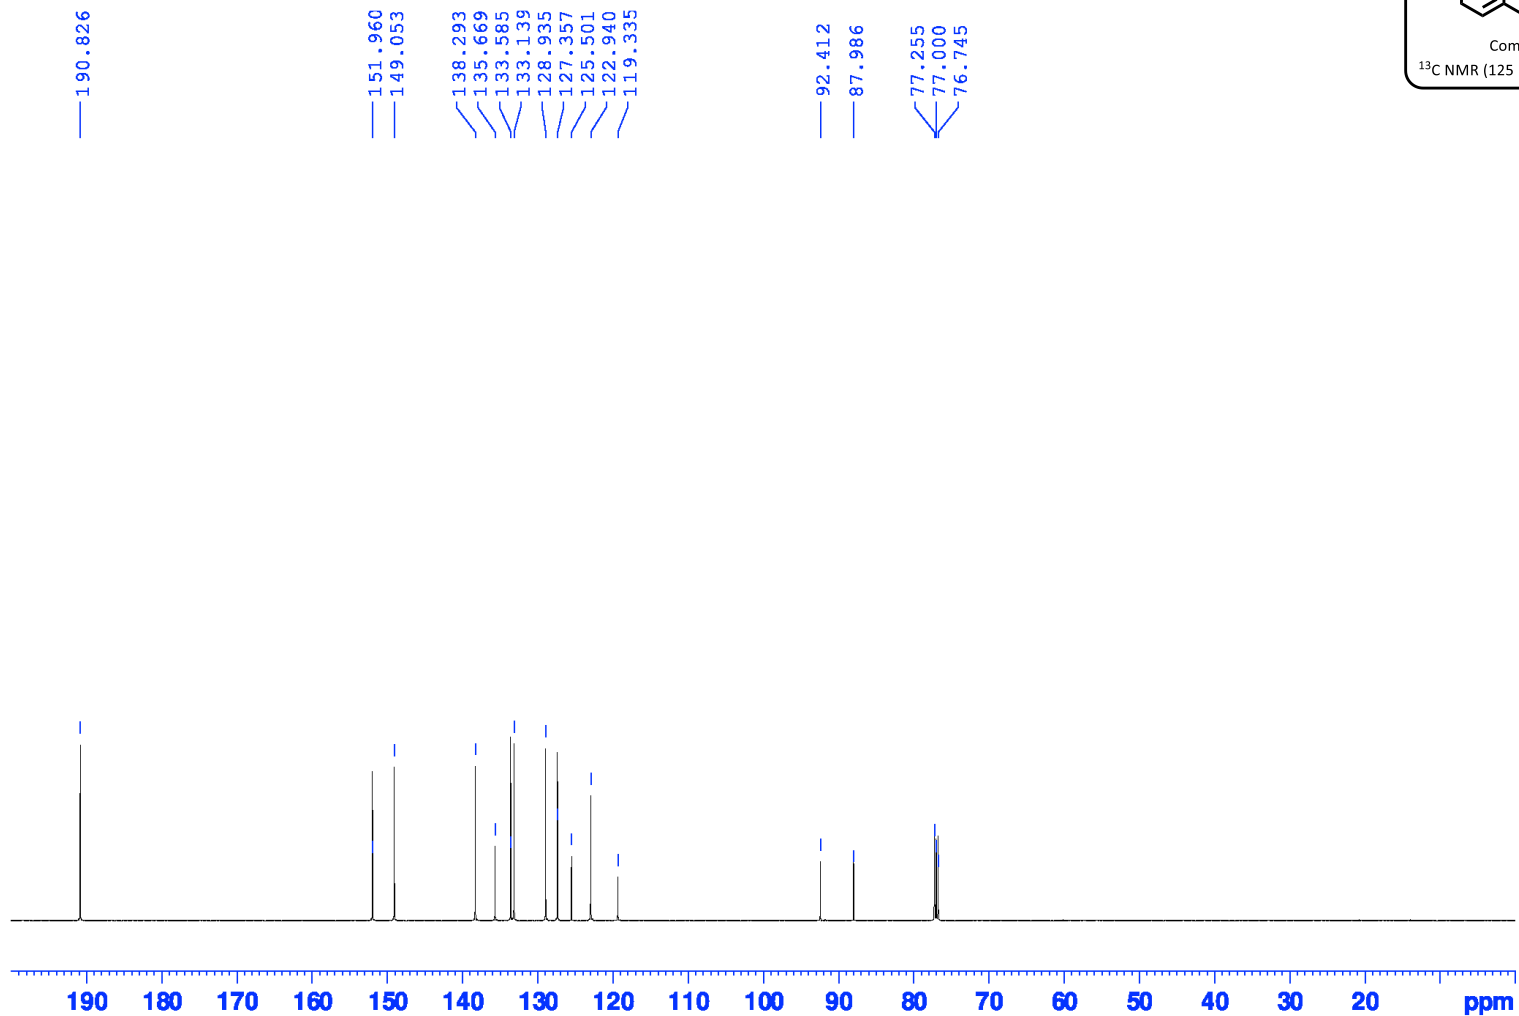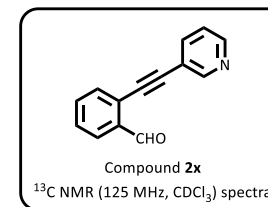

# The $^1\text{H}$ NMR spectrum in $\text{CDCl}_3$ of compound 1a.

1H CYL-740 sep 51-58 down 0825

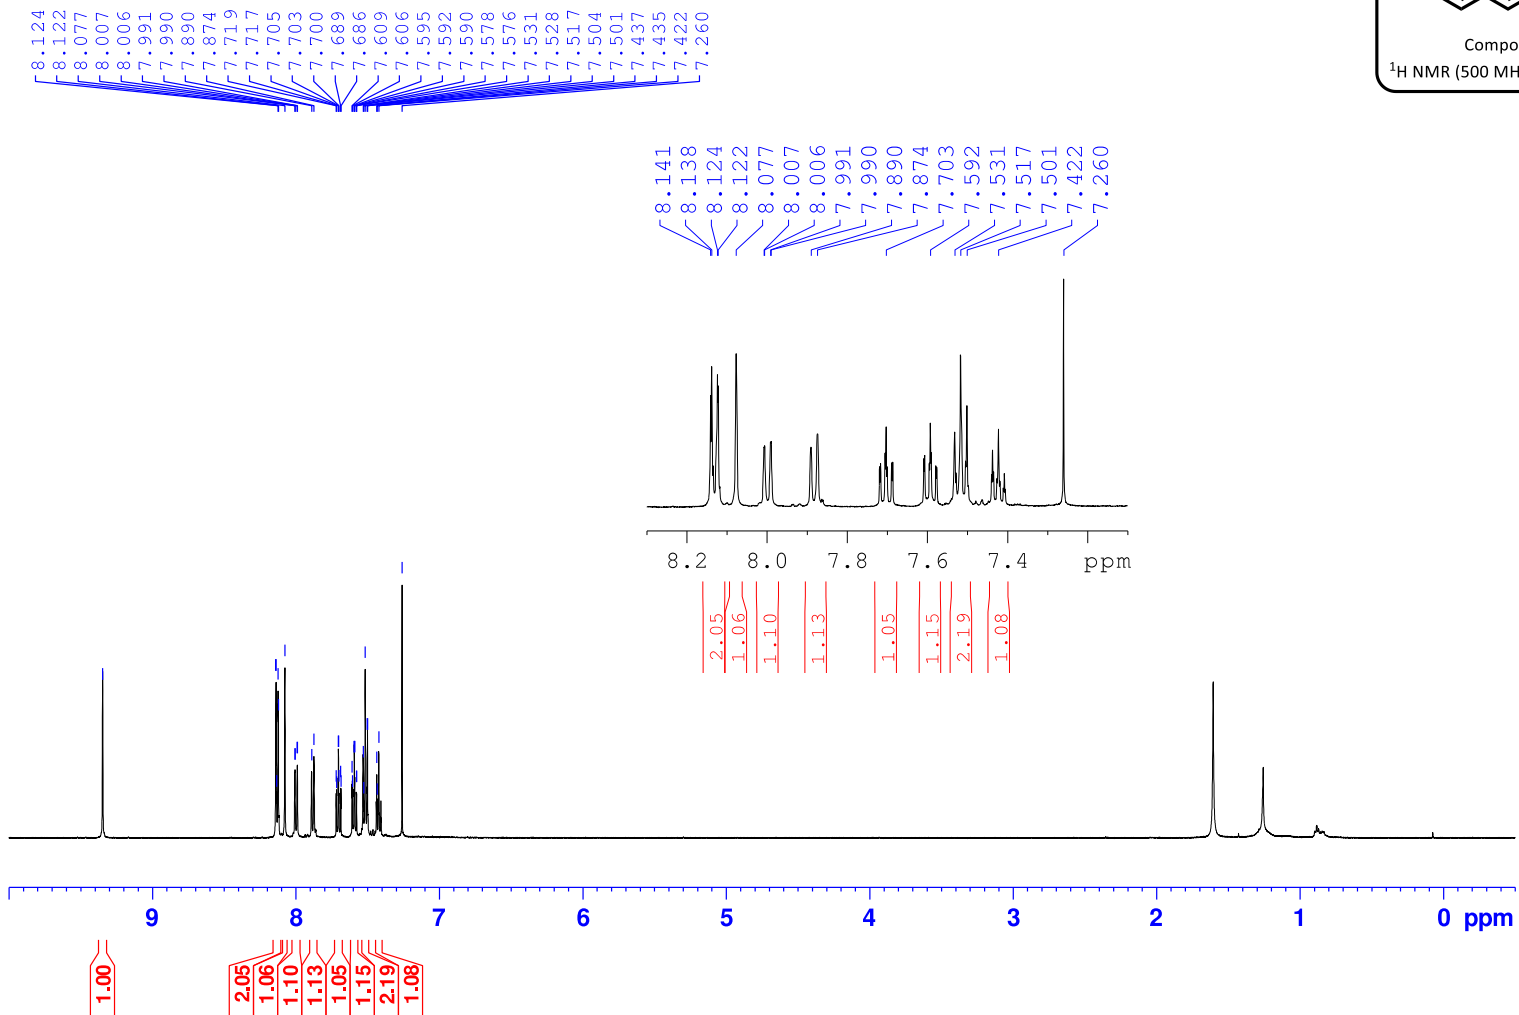

# The $^{13}\text{C}$ NMR spectrum in $\text{CDCl}_3$ of compound 1a.

13C CYL-740 sep 51-58 down 0825

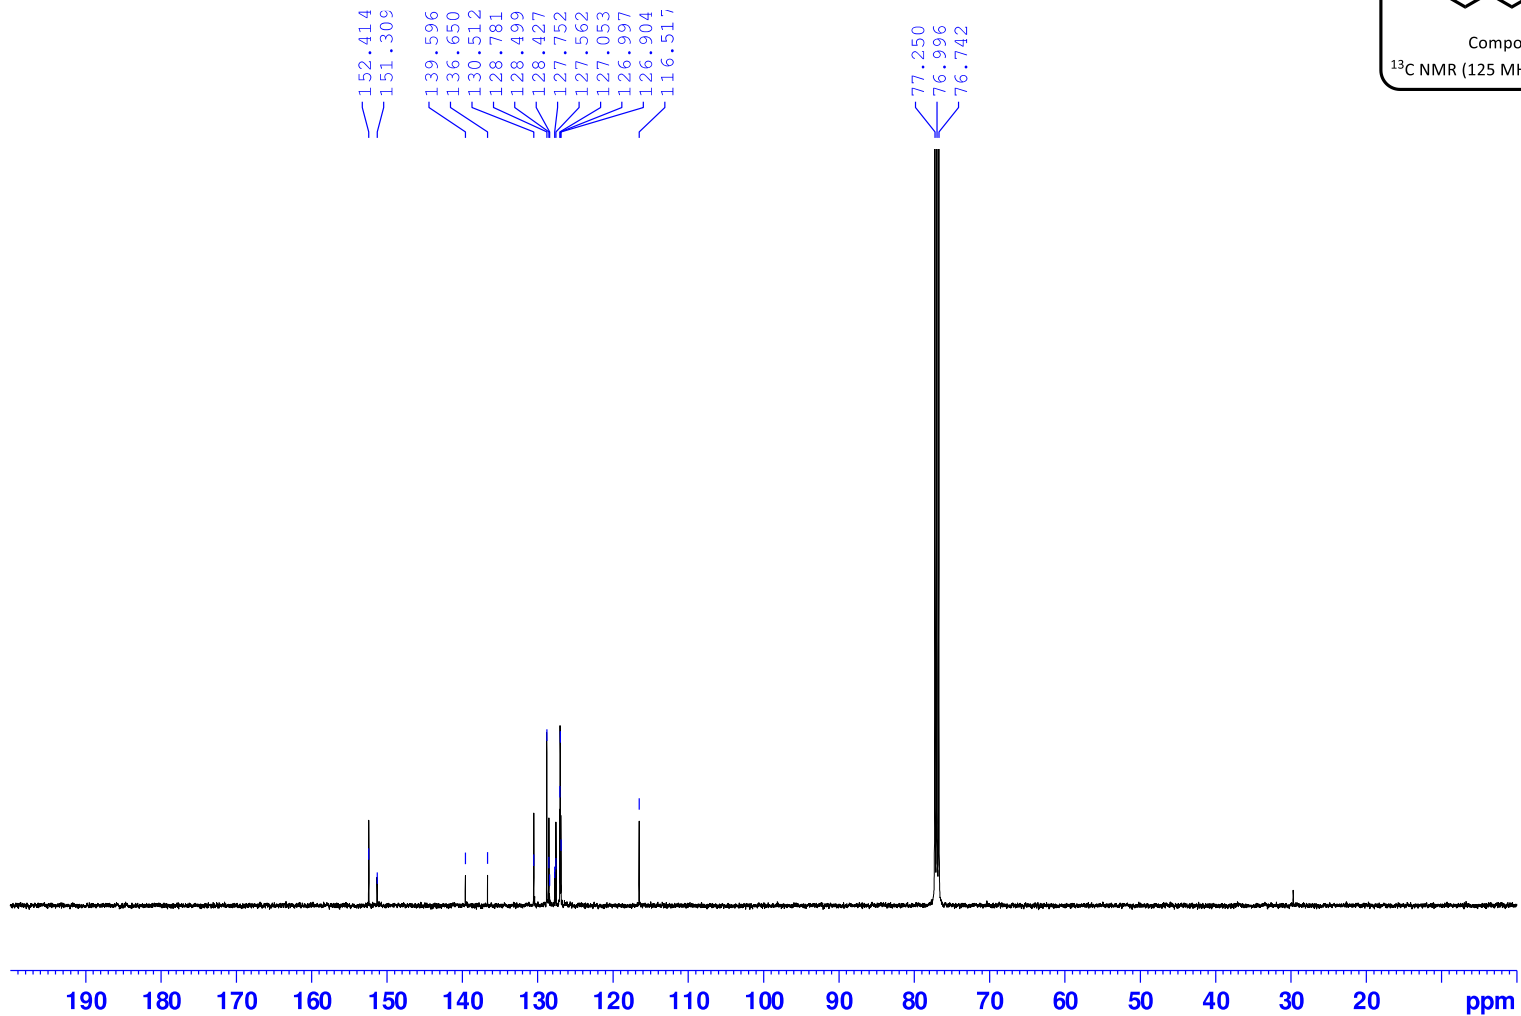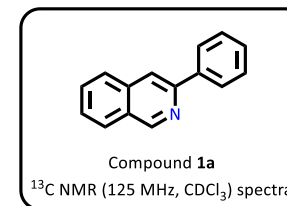

# The $^1\text{H}$ NMR spectrum in $\text{CDCl}_3$ of compound 1b.

1H CYL-741 sep 64 0119

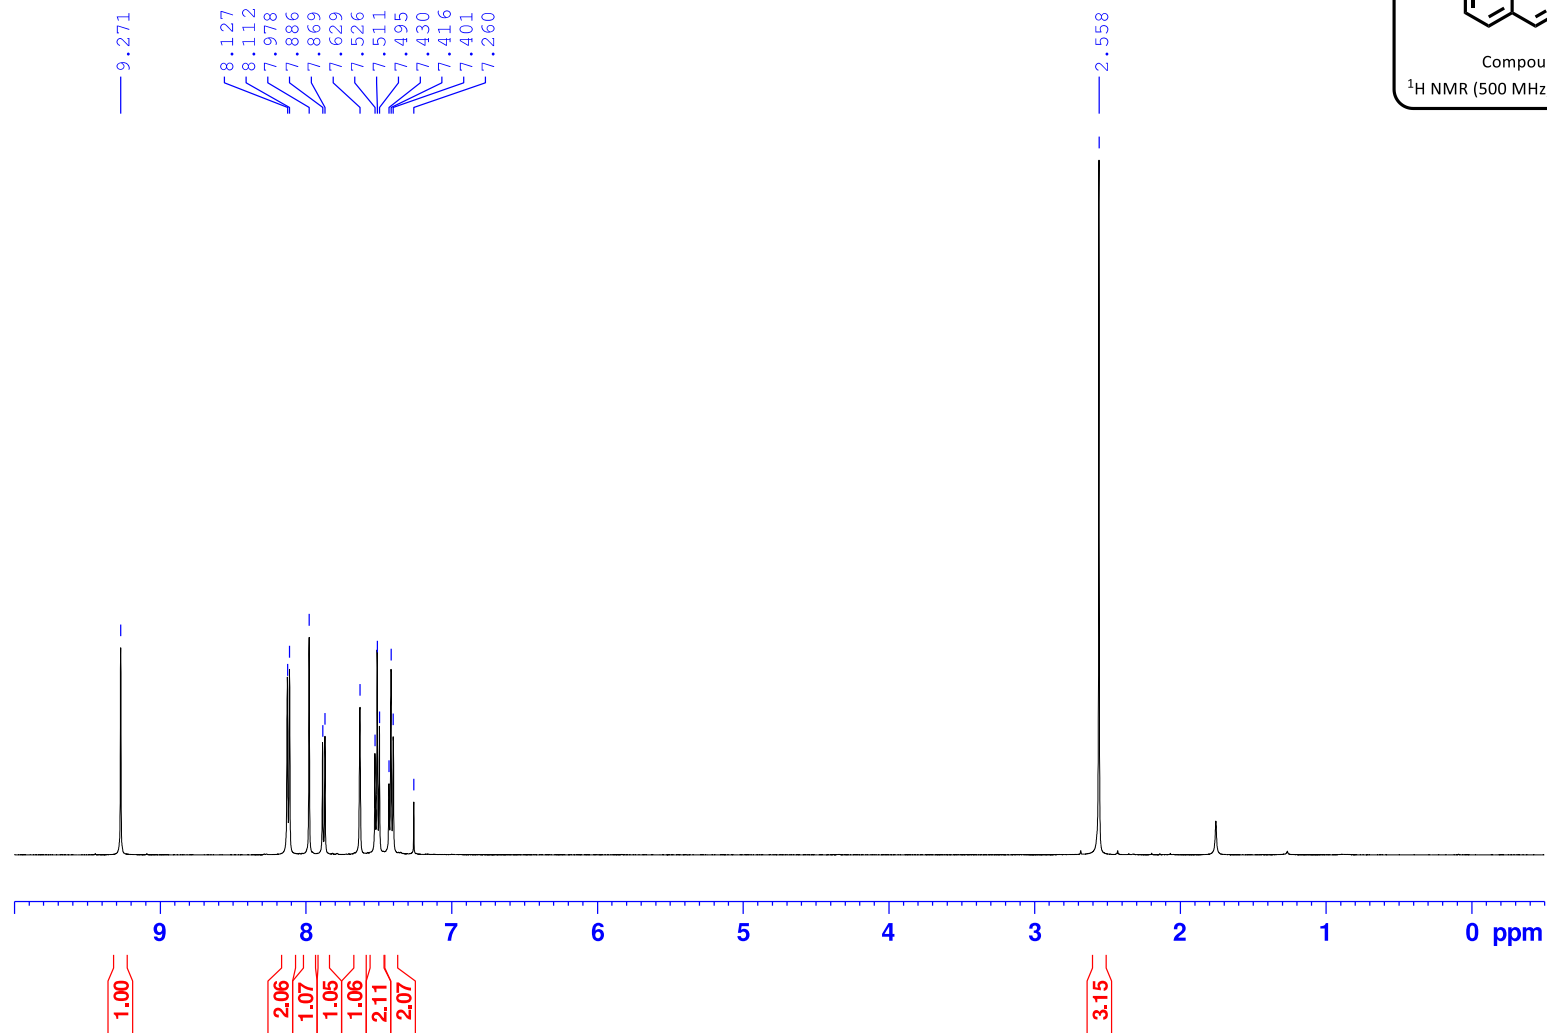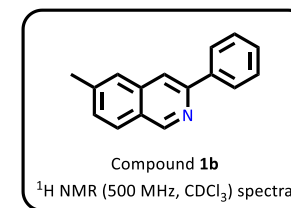

# The $^{13}\text{C}$ NMR spectrum in $\text{CDCl}_3$ of compound 1b.

13C CYL-741 sep 64 0119

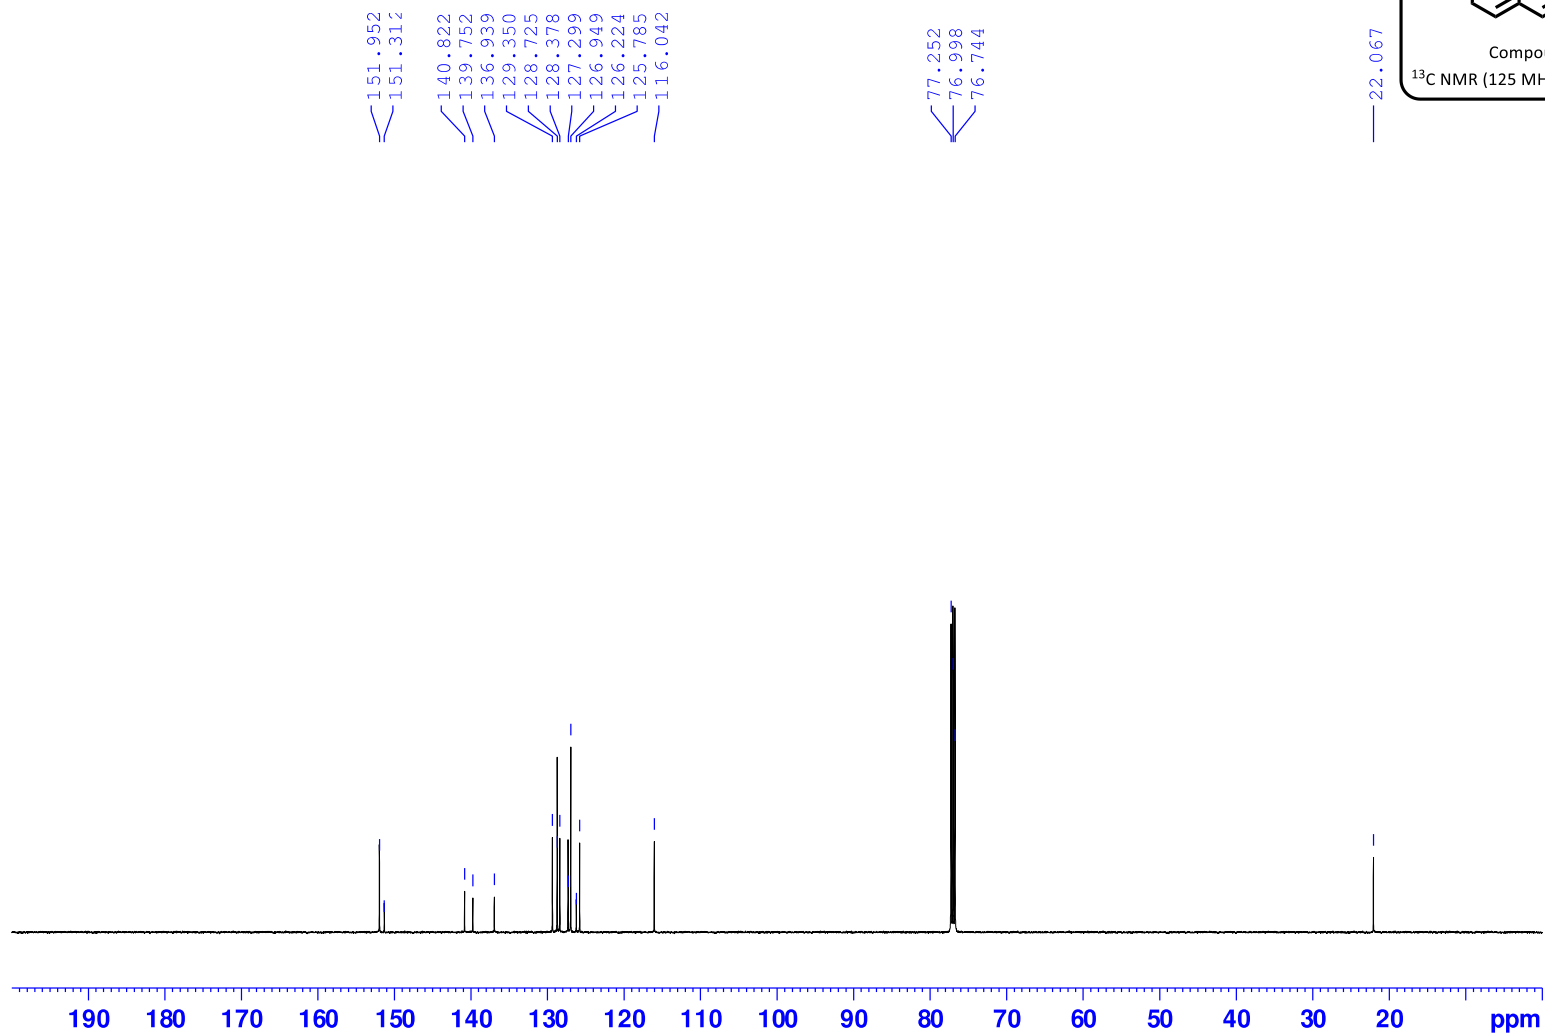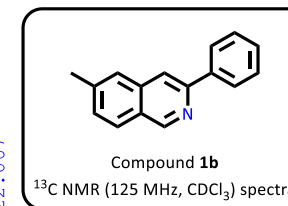

# The $^1\text{H}$ NMR spectrum in $\text{CDCl}_3$ of compound 1c.

1H CYL-742 sep 22 0119

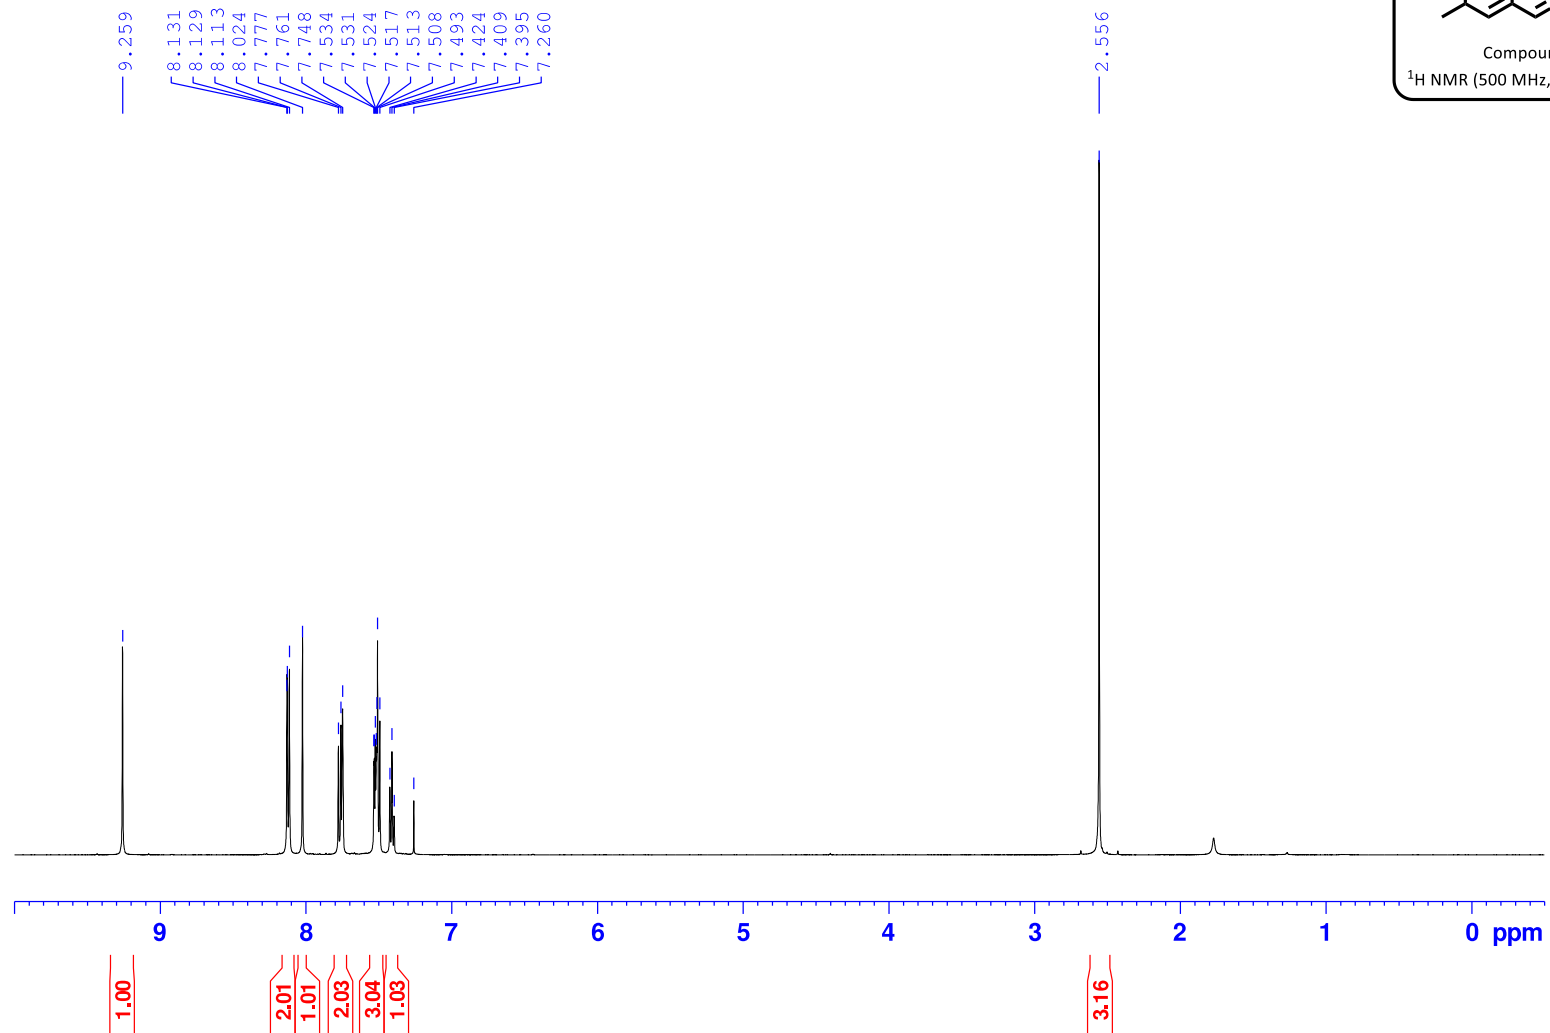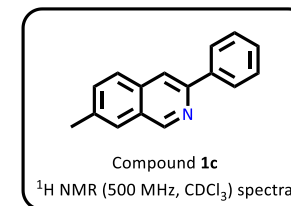

# The $^{13}\text{C}$ NMR spectrum in $\text{CDCl}_3$ of compound 1c.

13C CYL-742 sep 22 0119

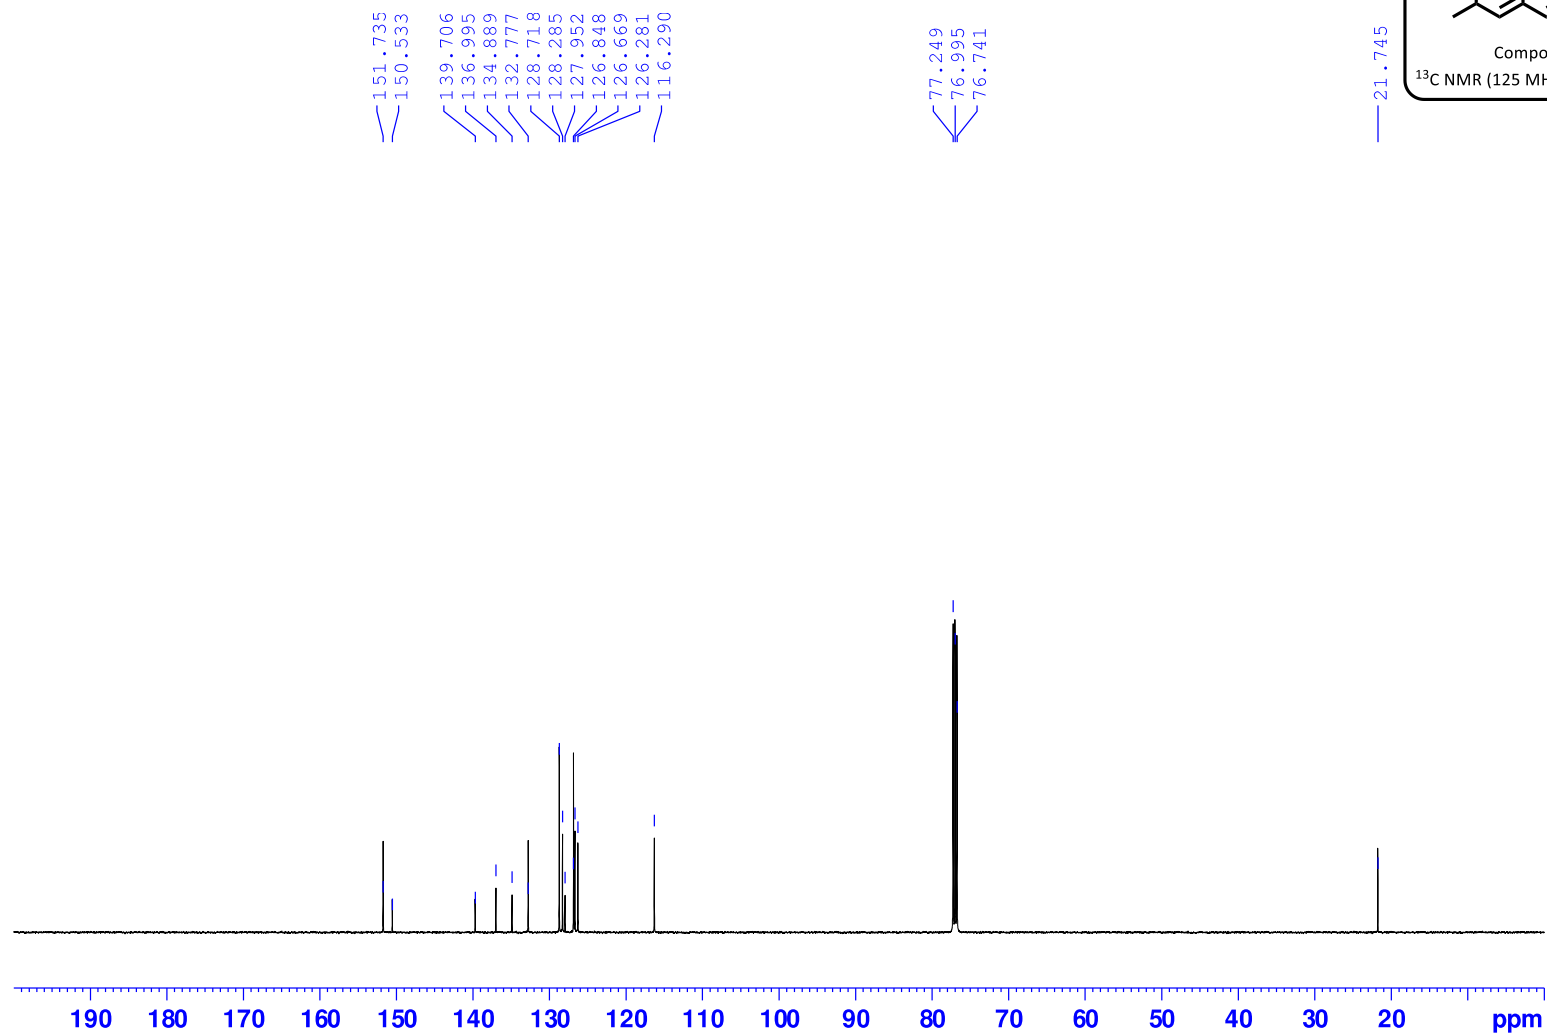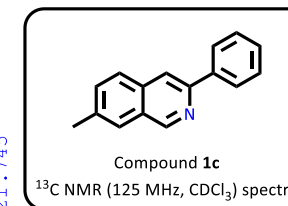



# The <sup>1</sup>H NMR spectrum in CDCl<sub>3</sub> of compound 1d.

1H CYL-743 sep 21 0121

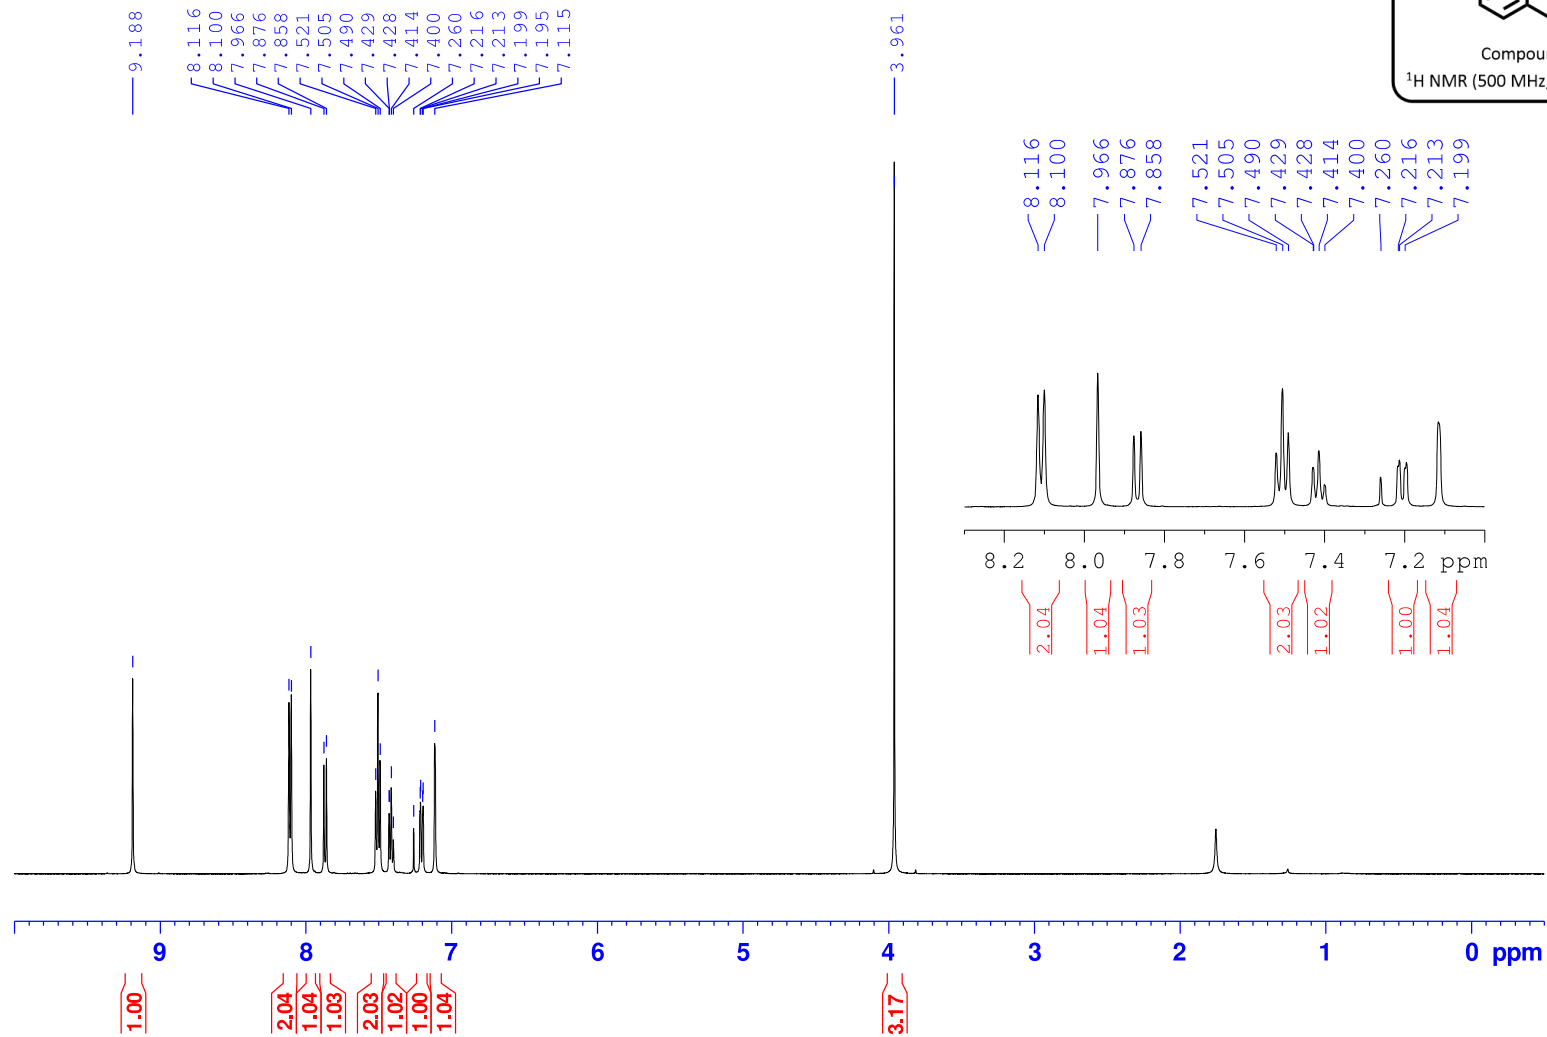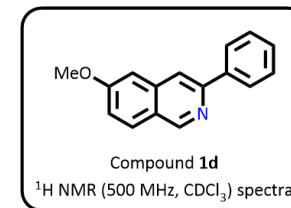

# The $^{13}\text{C}$ NMR spectrum in $\text{CDCl}_3$ of compound 1d.

13C CYL-743 sep 21 0121

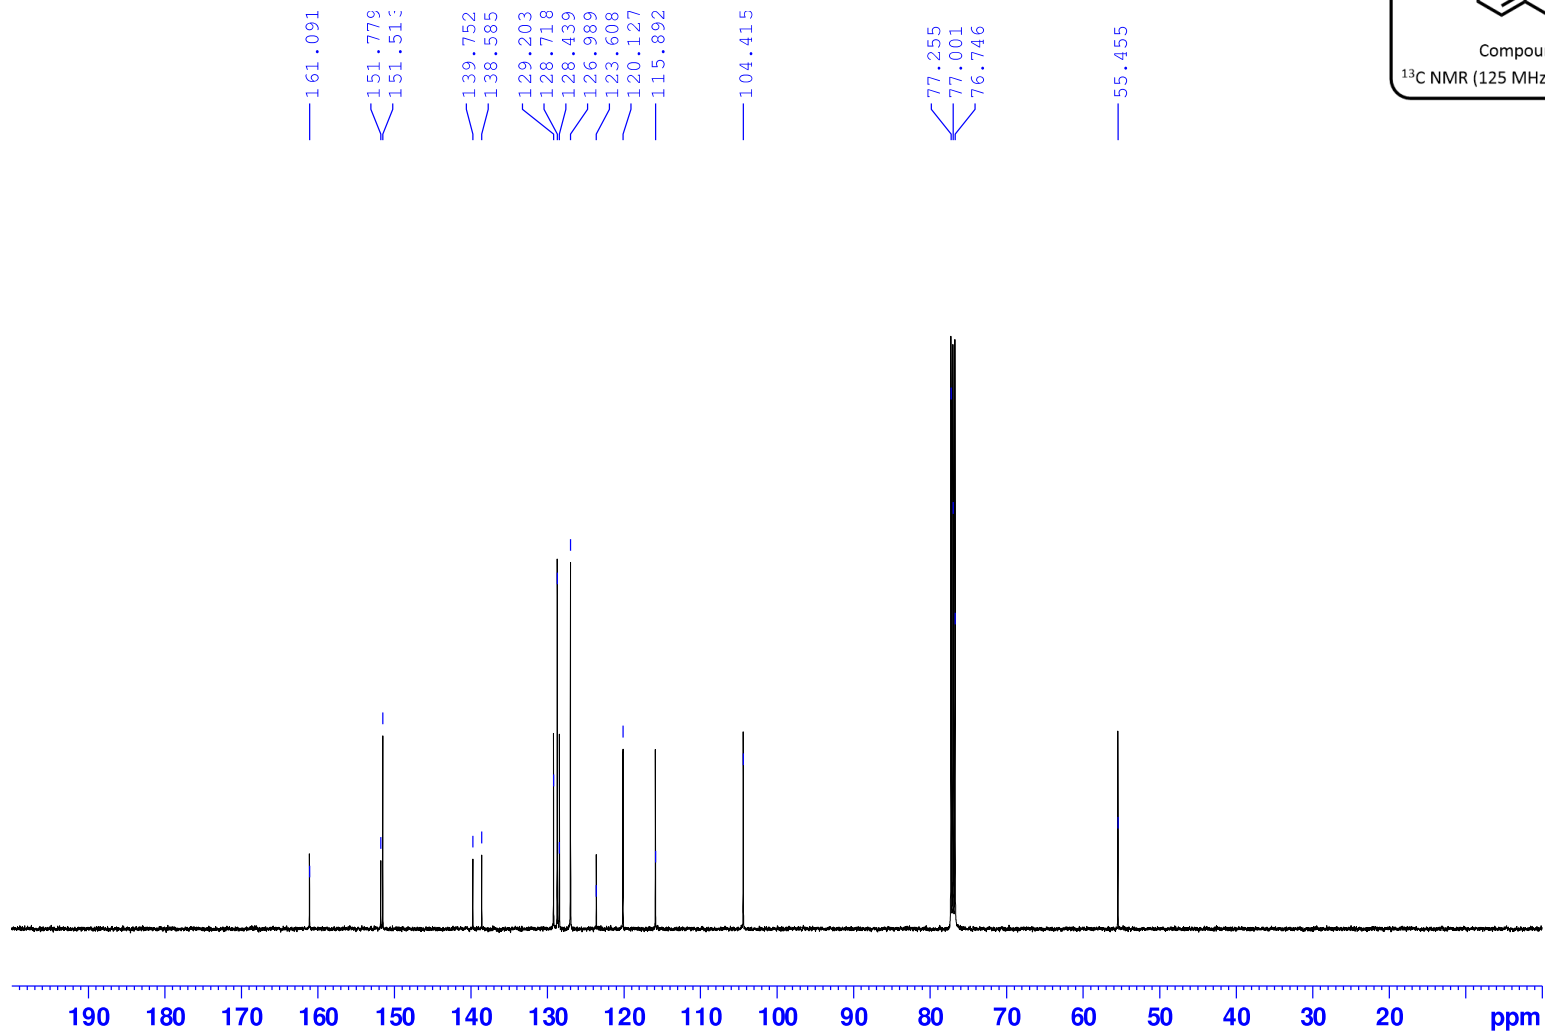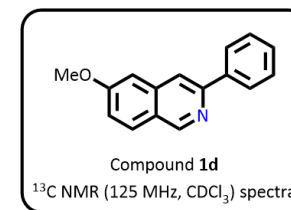

# The <sup>1</sup>H NMR spectrum in CDCl<sub>3</sub> of compound 1e.

1H CYL-744 sep 31 0122

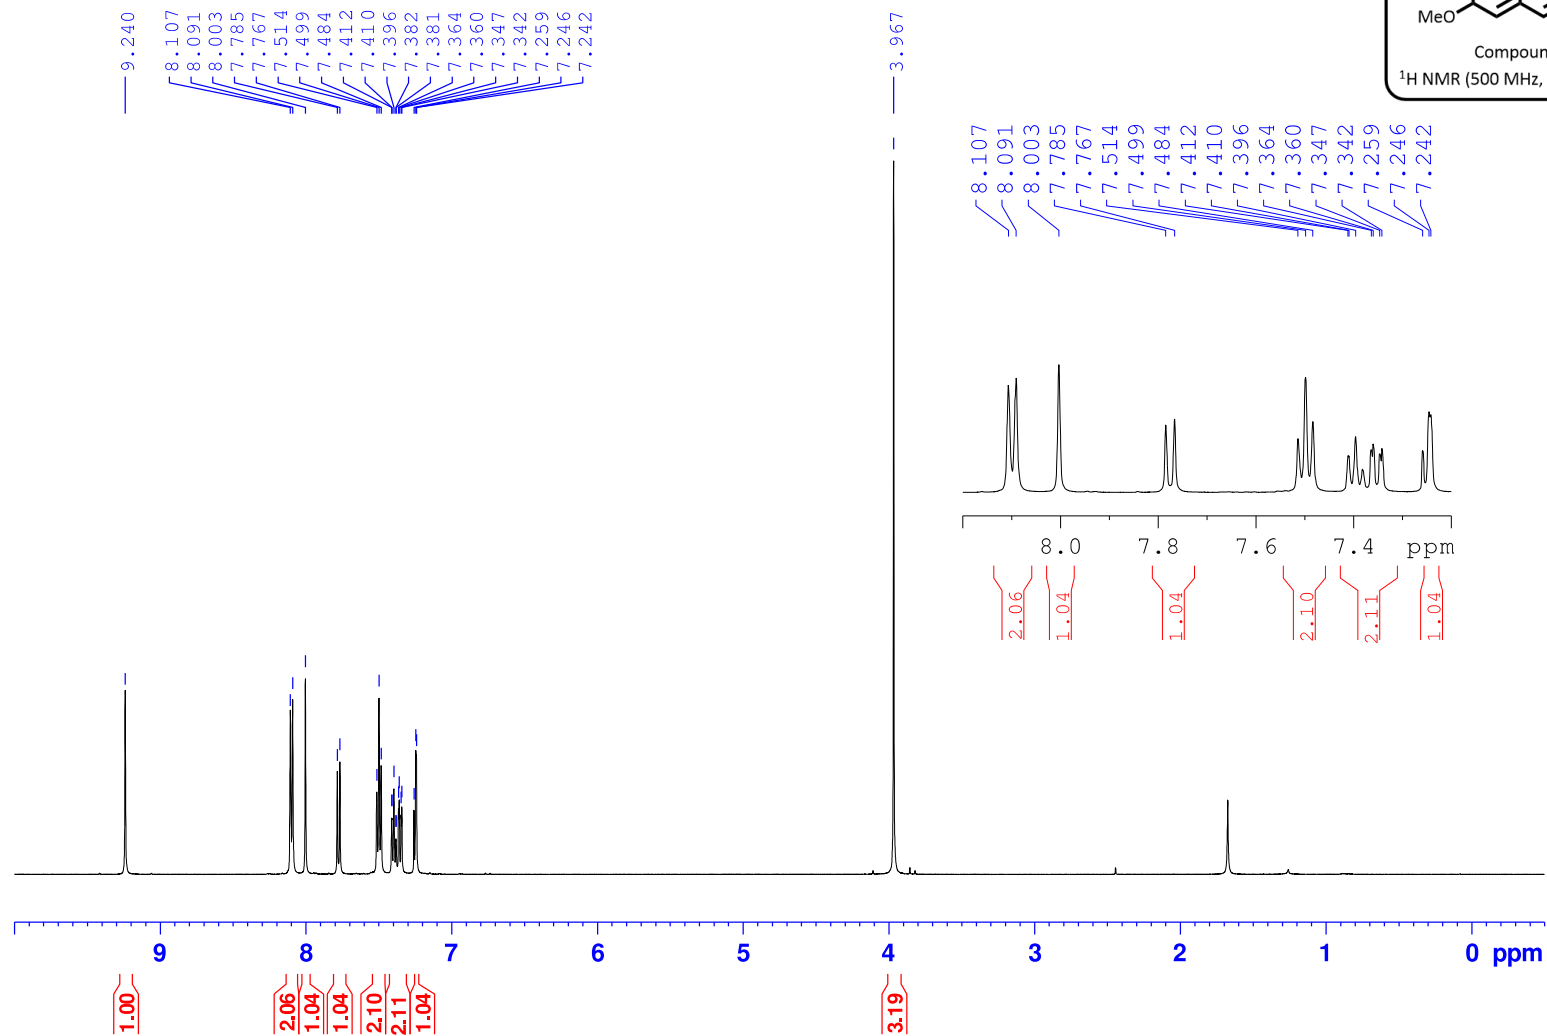

# The $^{13}\text{C}$ NMR spectrum in $\text{CDCl}_3$ of compound 1e.

13C CYL-744 sep 31 0122

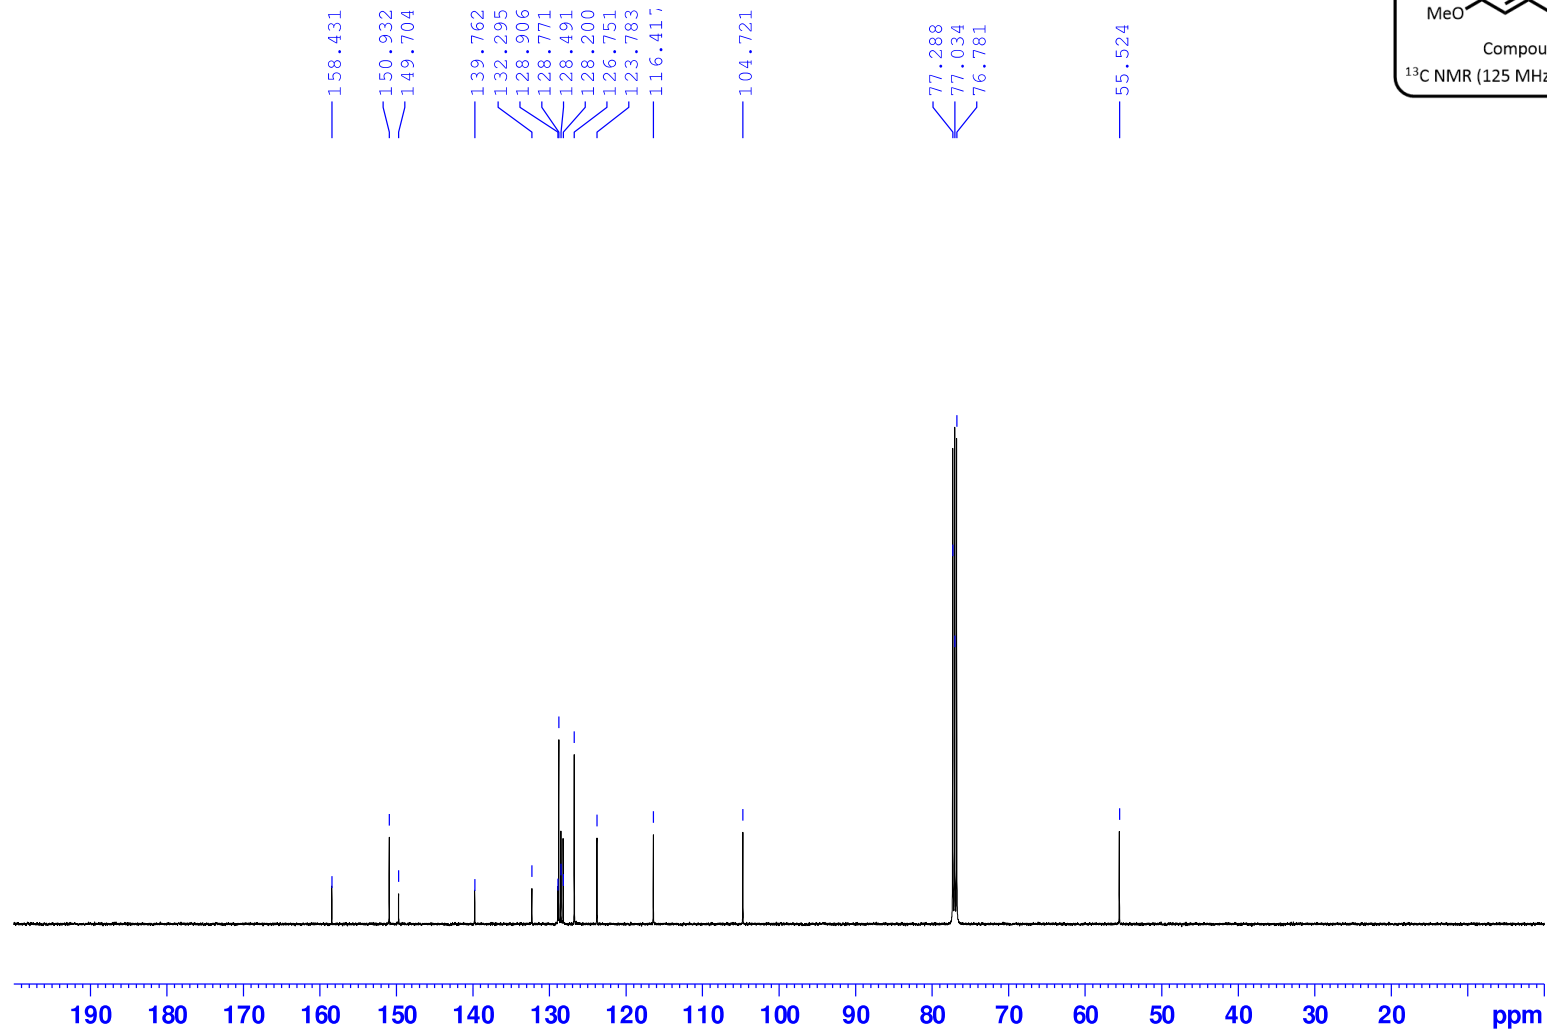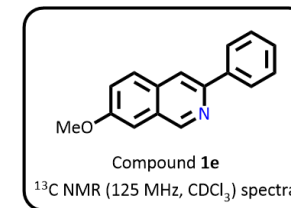

# The $^1\text{H}$ NMR spectrum in $\text{CDCl}_3$ of compound 1f.

1H CYL-730 sep 100 101 0110

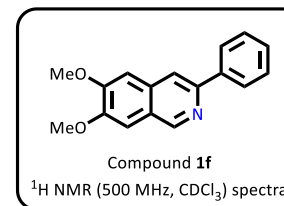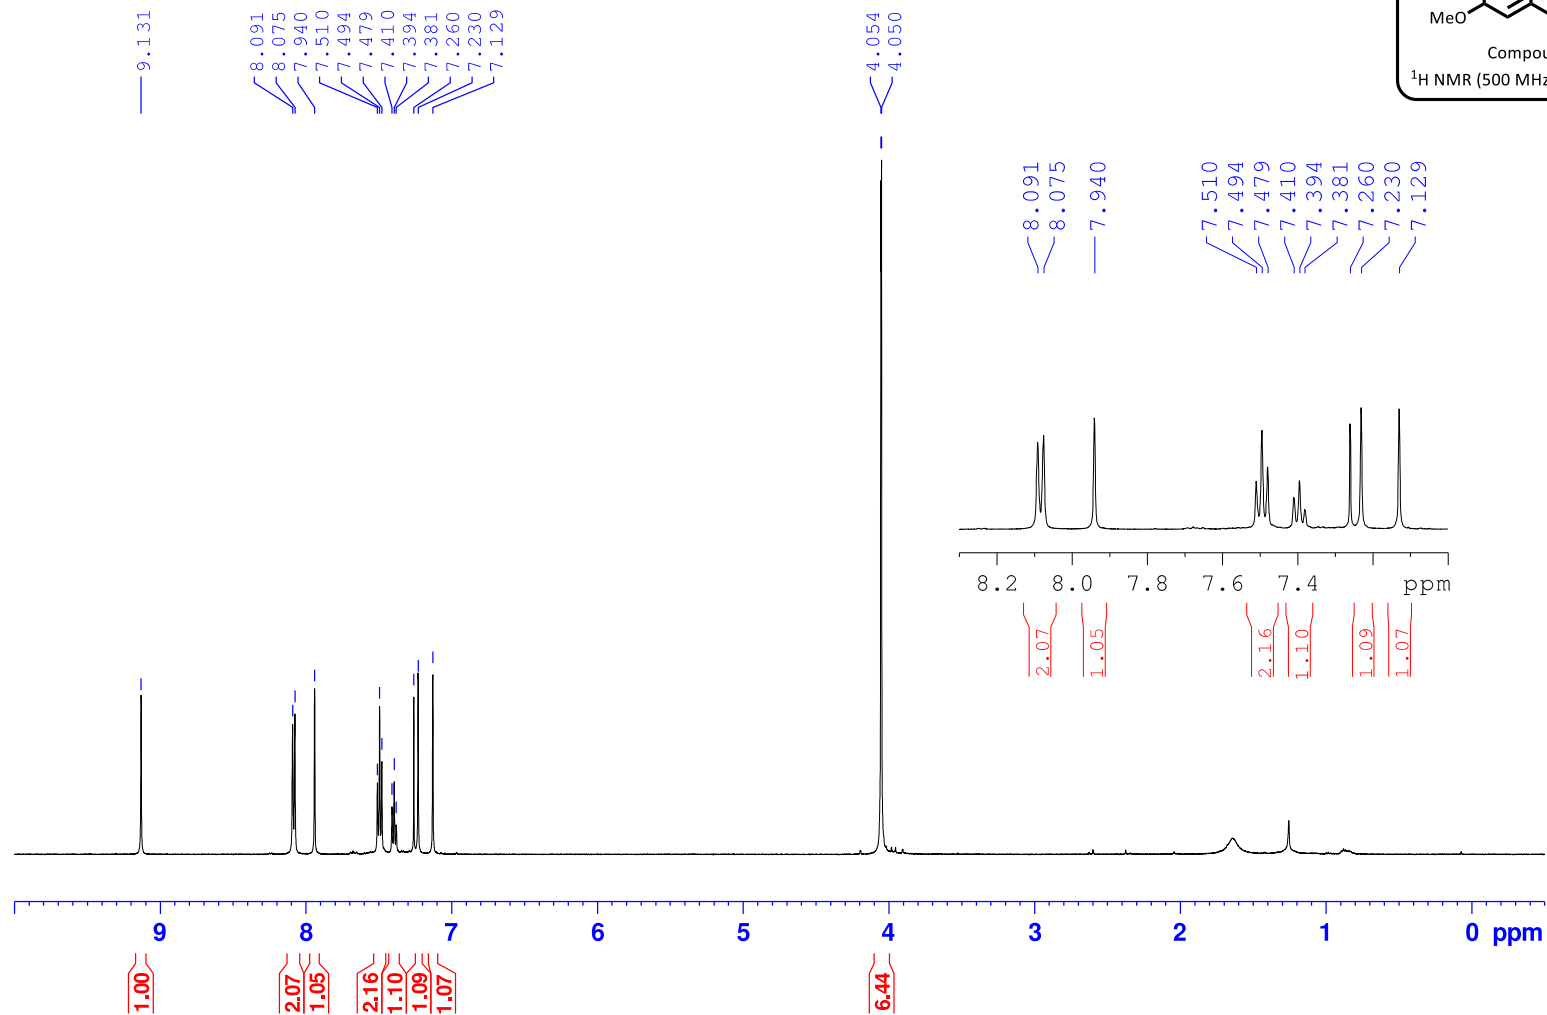

# The $^{13}\text{C}$ NMR spectrum in $\text{CDCl}_3$ of compound **1f**.

13C CYL-730 sep 100 101 0110

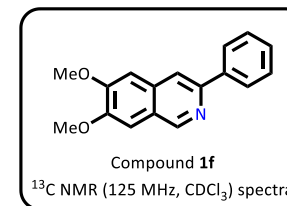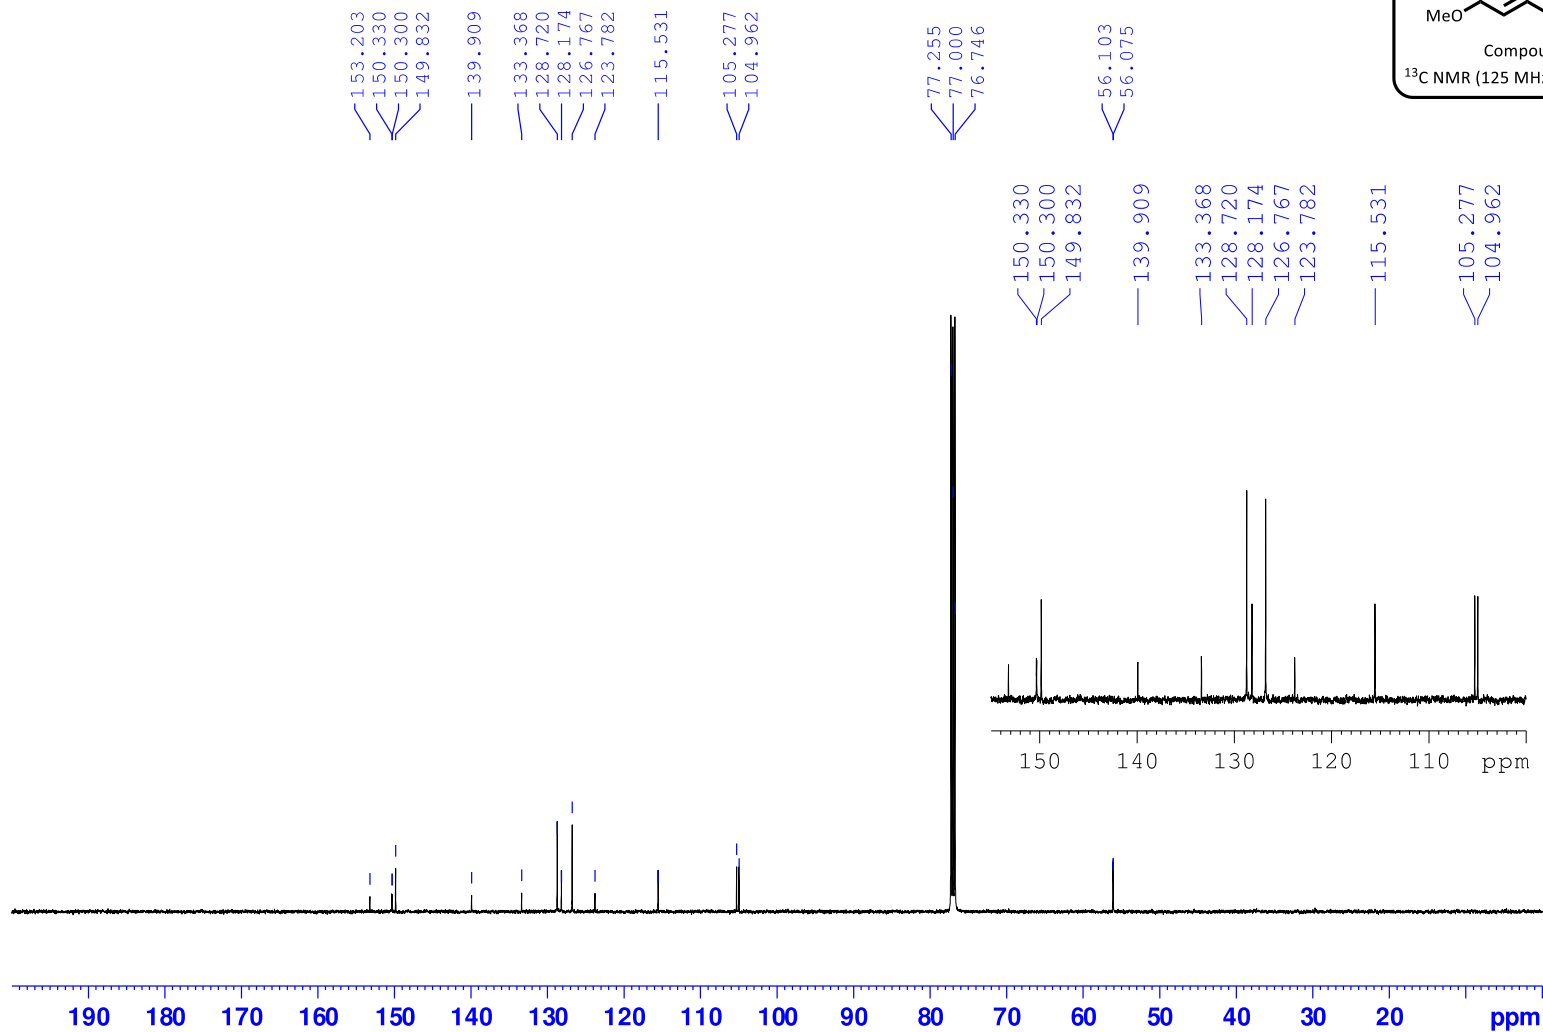

# The $^1\text{H}$ NMR spectrum in $\text{CDCl}_3$ of compound 1g.

$^1\text{H}$  FCL-729

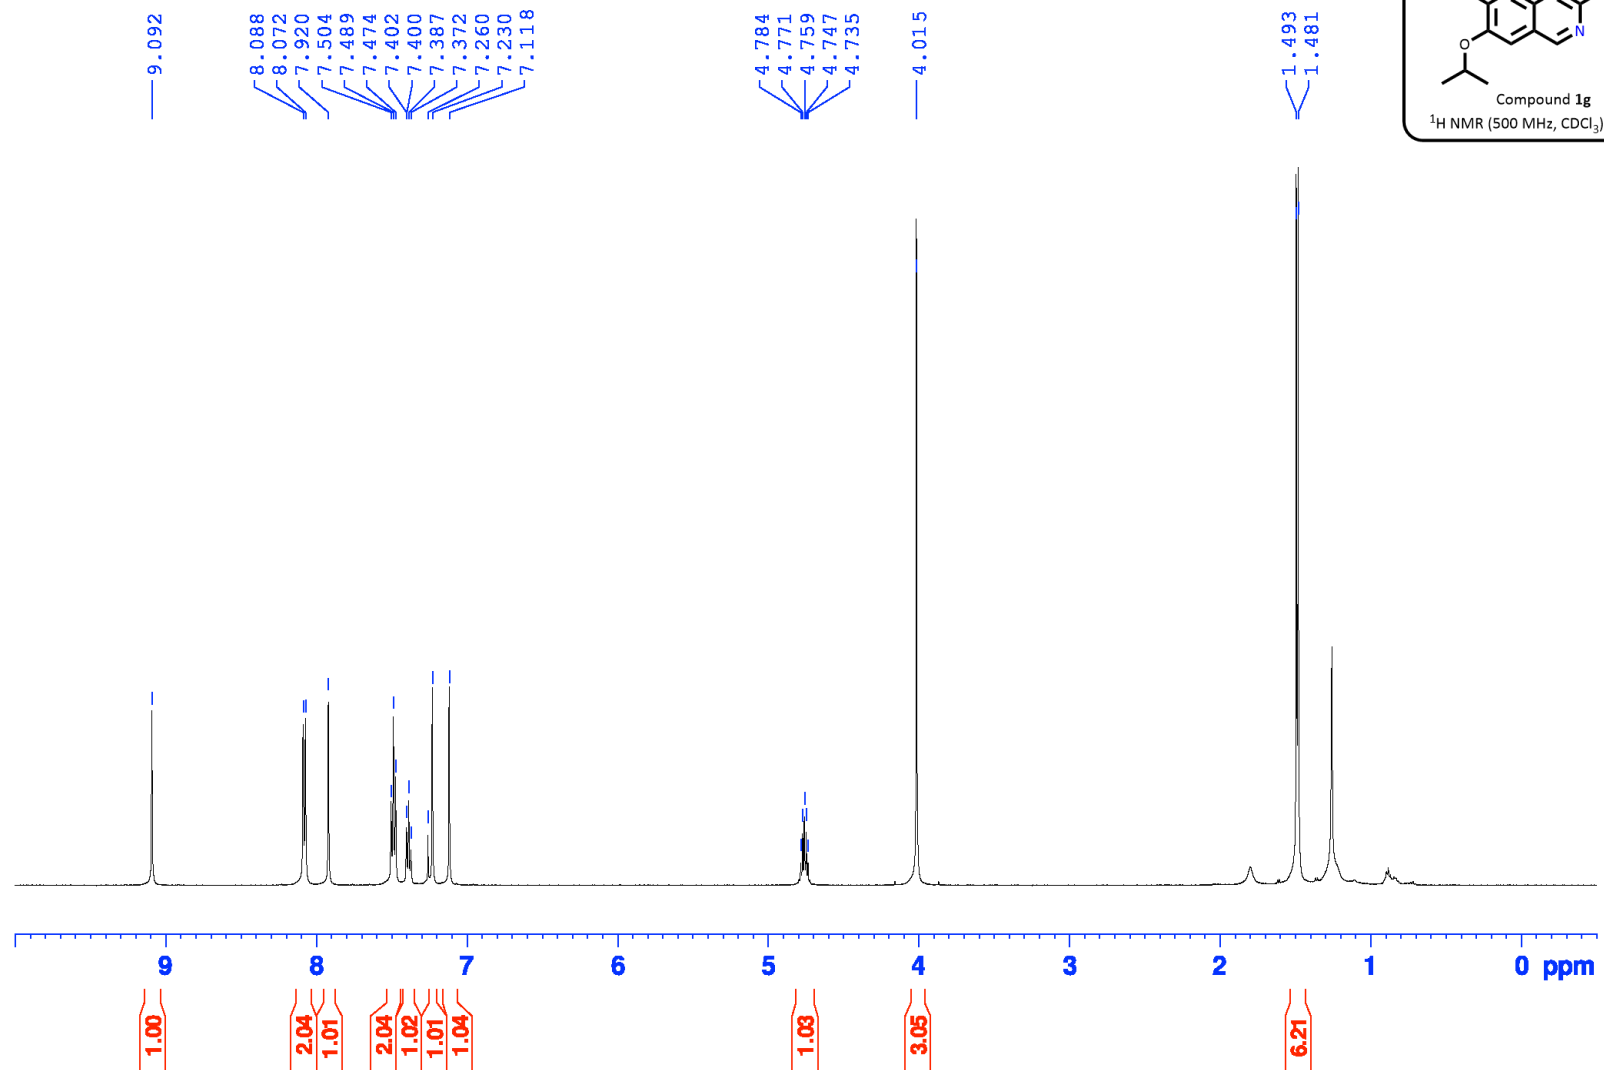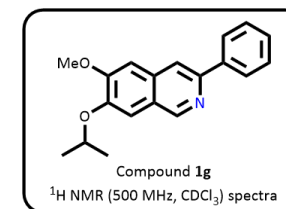

# The $^{13}\text{C}$ NMR spectrum in $\text{CDCl}_3$ of compound 1g.

13C FCL-729

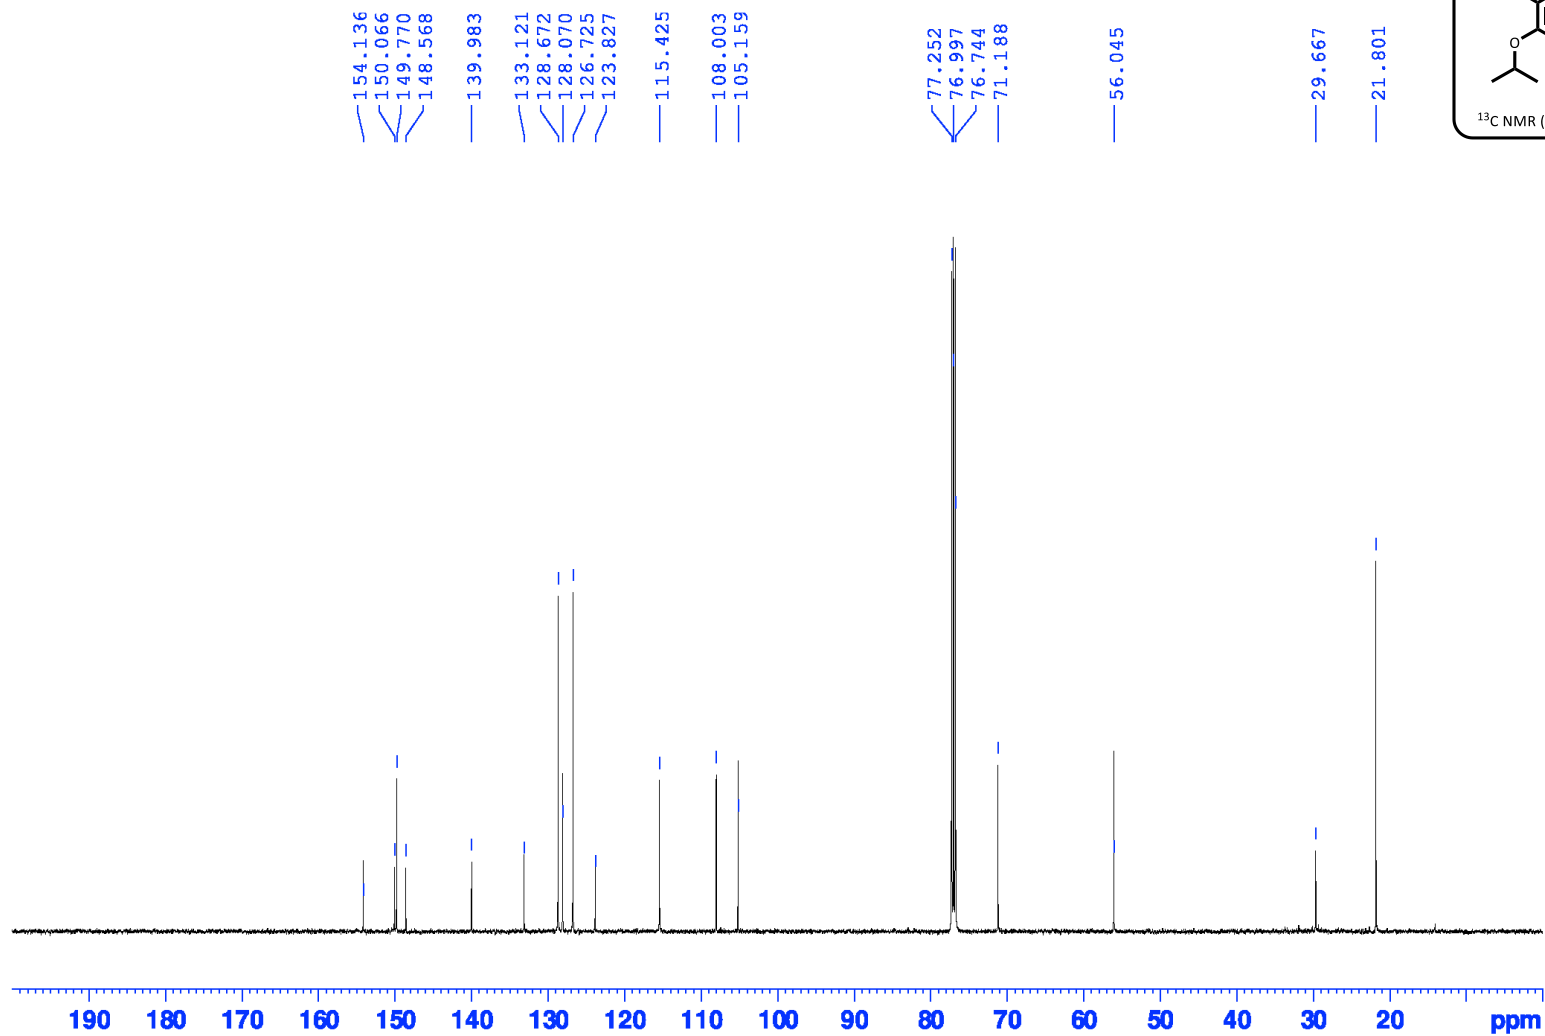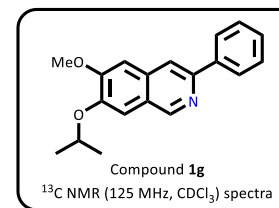



# The $^1\text{H}$ NMR spectrum in $\text{CDCl}_3$ of compound 1h.

1H CYL-763 sep 26 0221

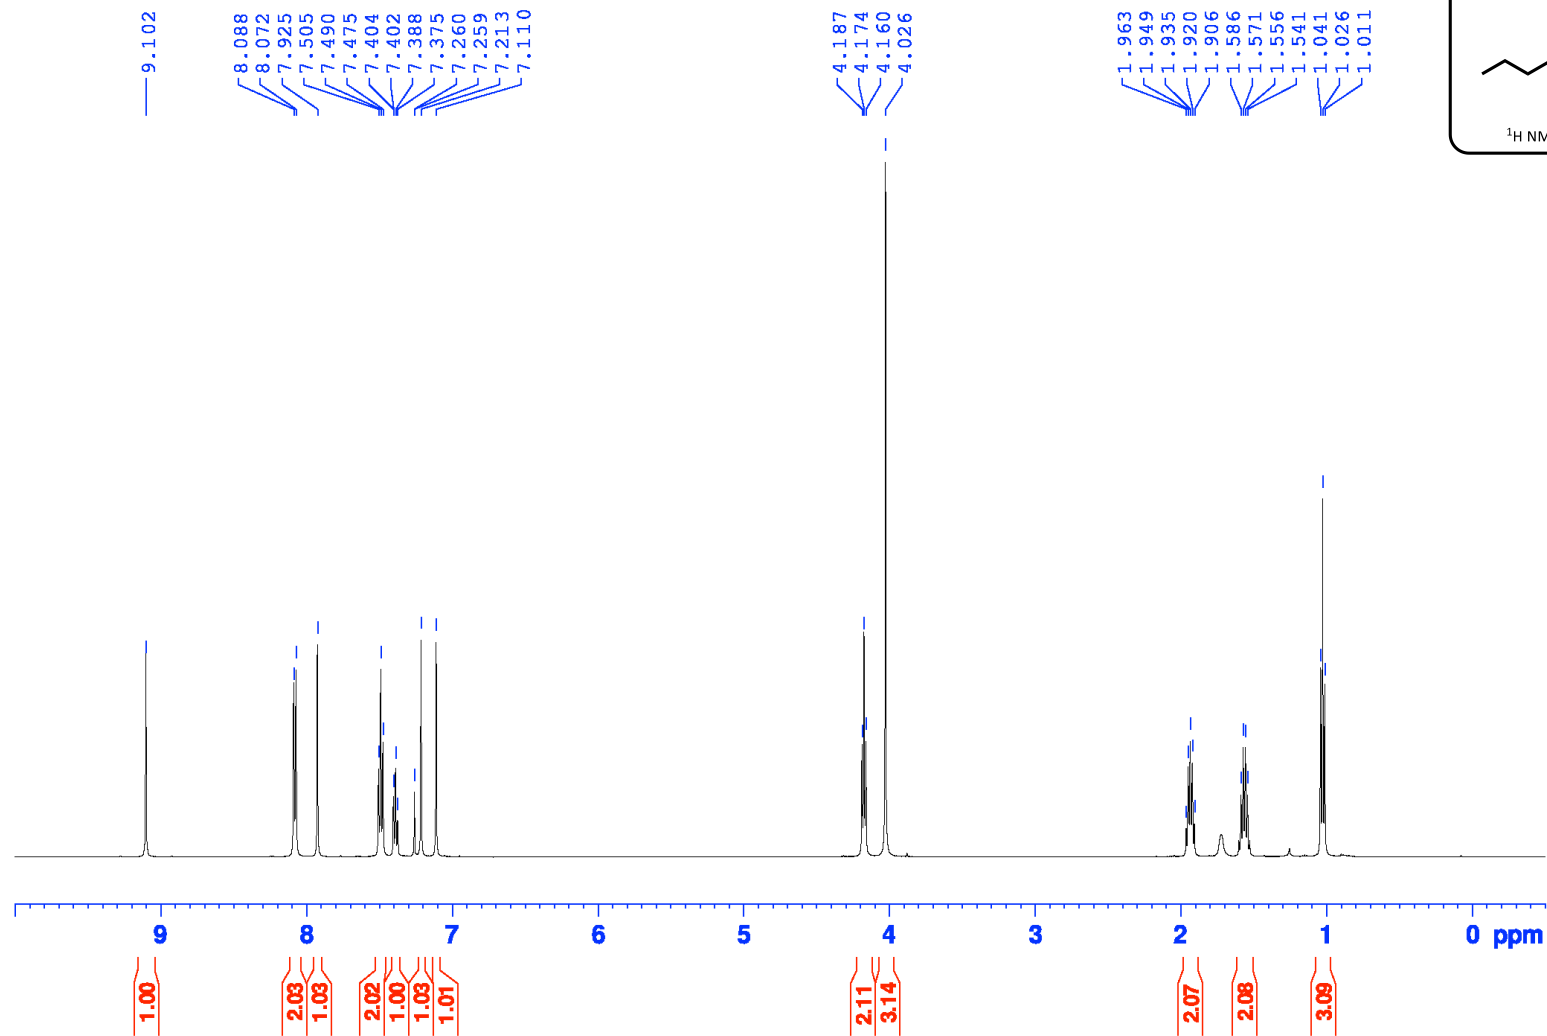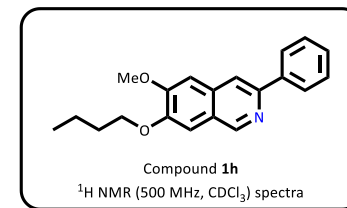

# The $^{13}\text{C}$ NMR spectrum in $\text{CDCl}_3$ of compound 1h.

13C CYL-763 sep 26 0221

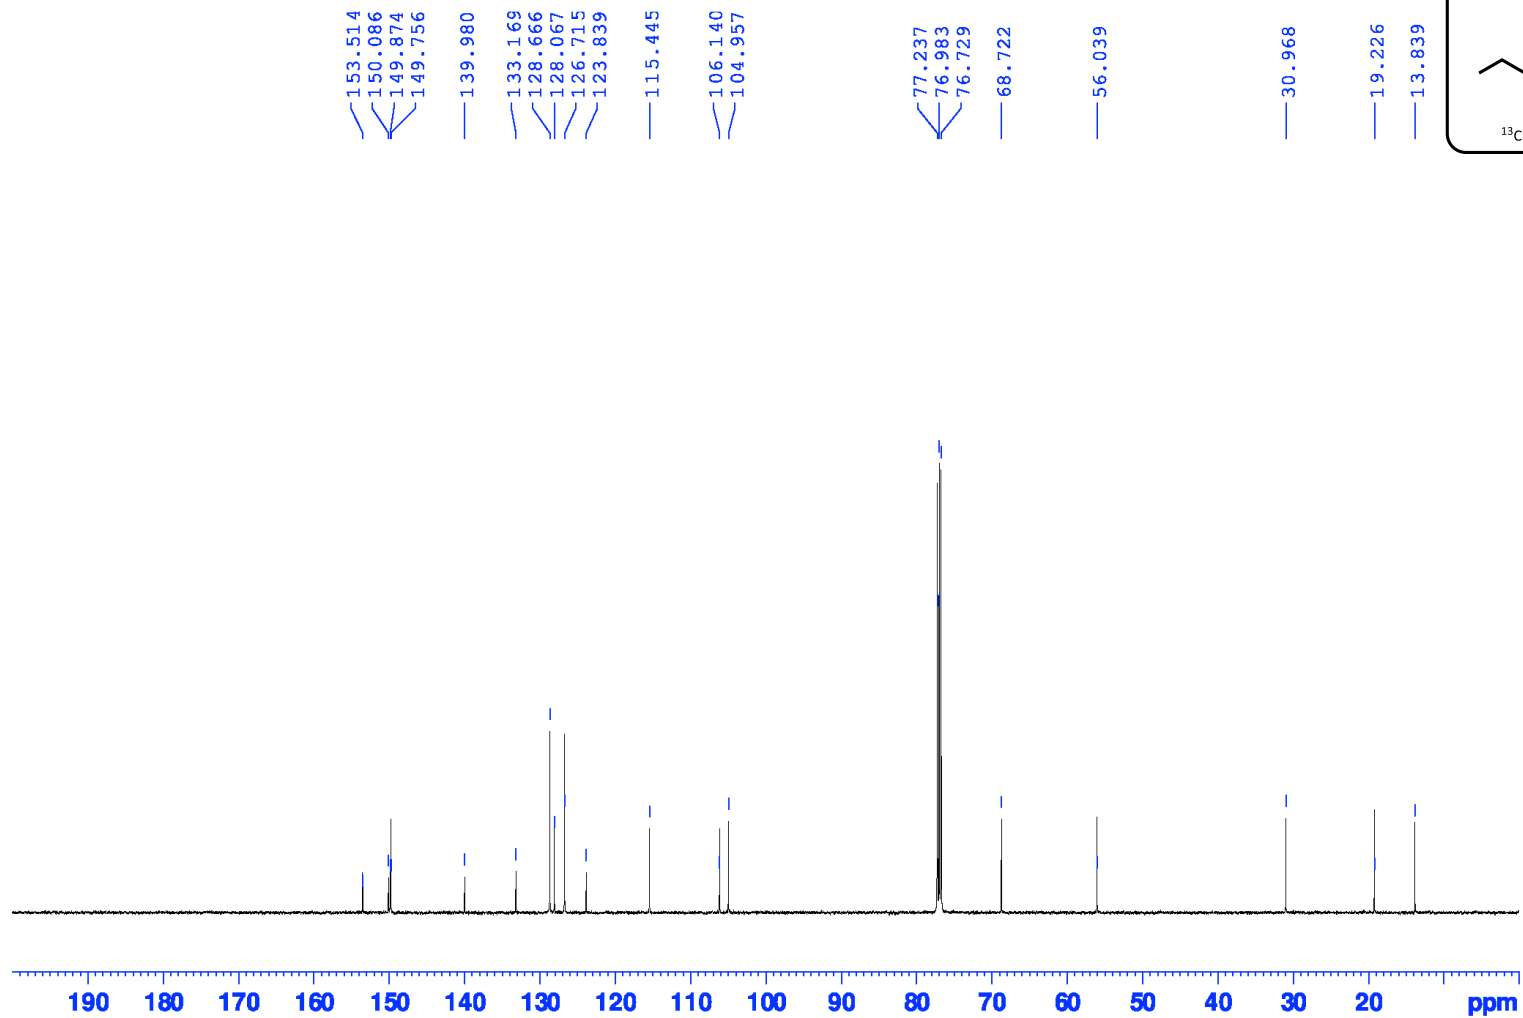

# The $^1\text{H}$ NMR spectrum in $\text{CDCl}_3$ of compound 1i.

1H CYL-745 sep 29 0124

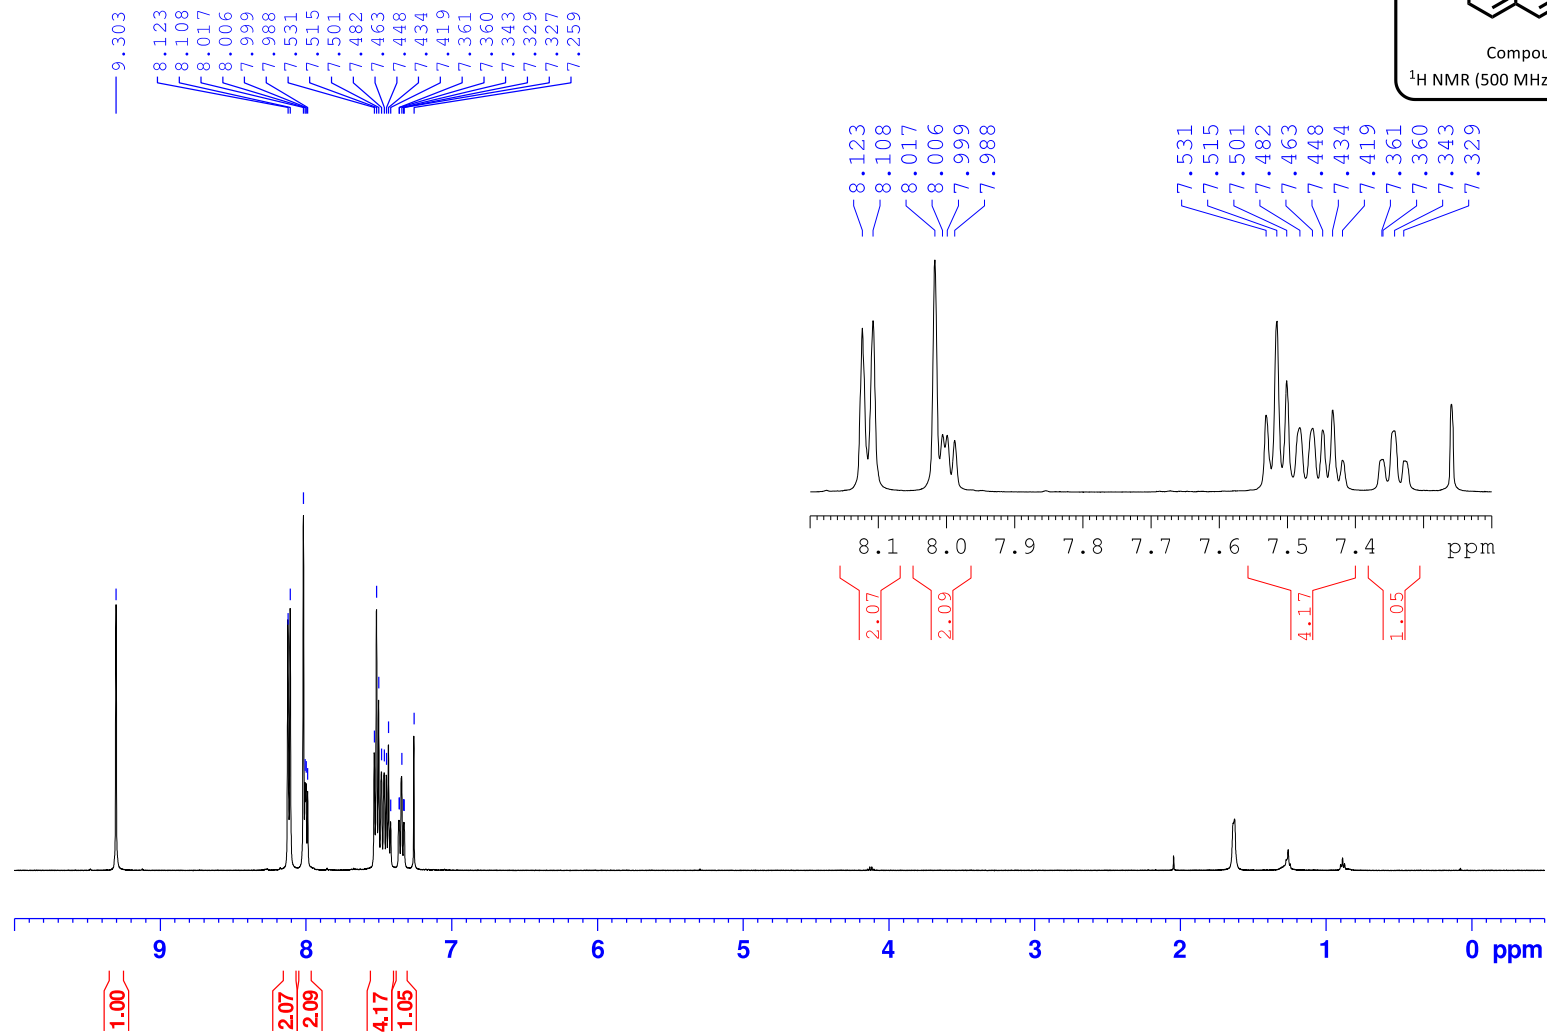

# The $^{13}\text{C}$ NMR spectrum in $\text{CDCl}_3$ of compound 1i.

13C CYL-745 sep 29 0124

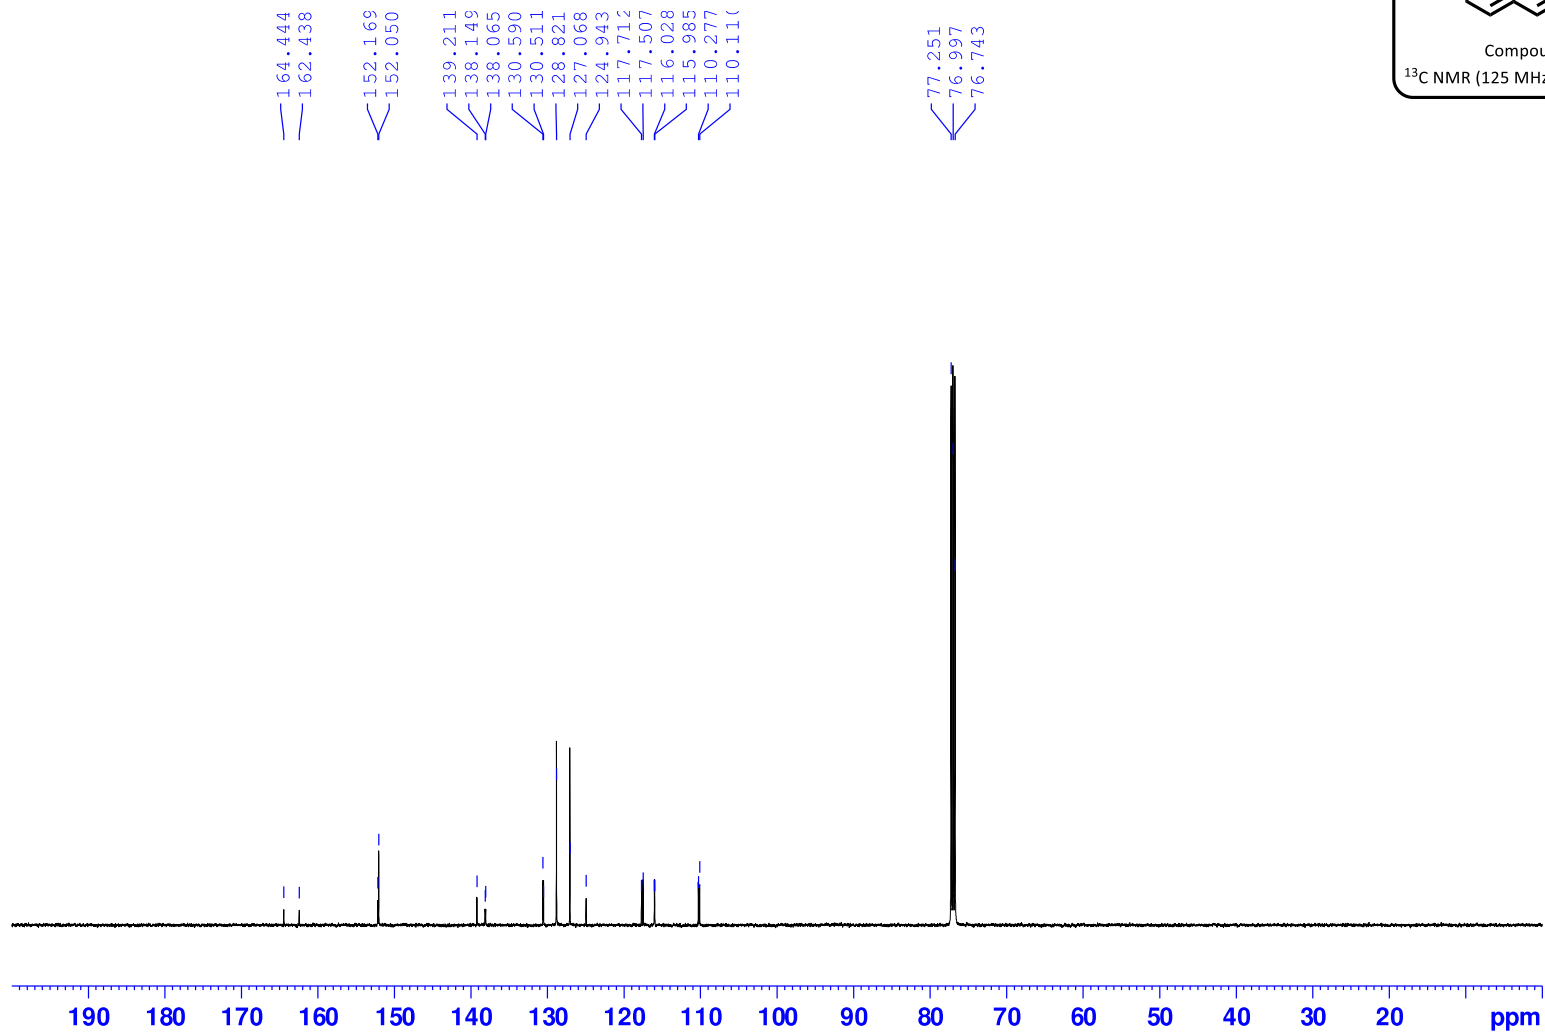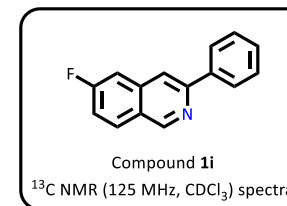

# The <sup>1</sup>H NMR spectrum in CDCl<sub>3</sub> of compound 1j.

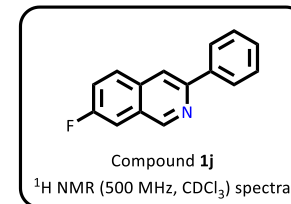

1H CYL-746 sep 13 0125

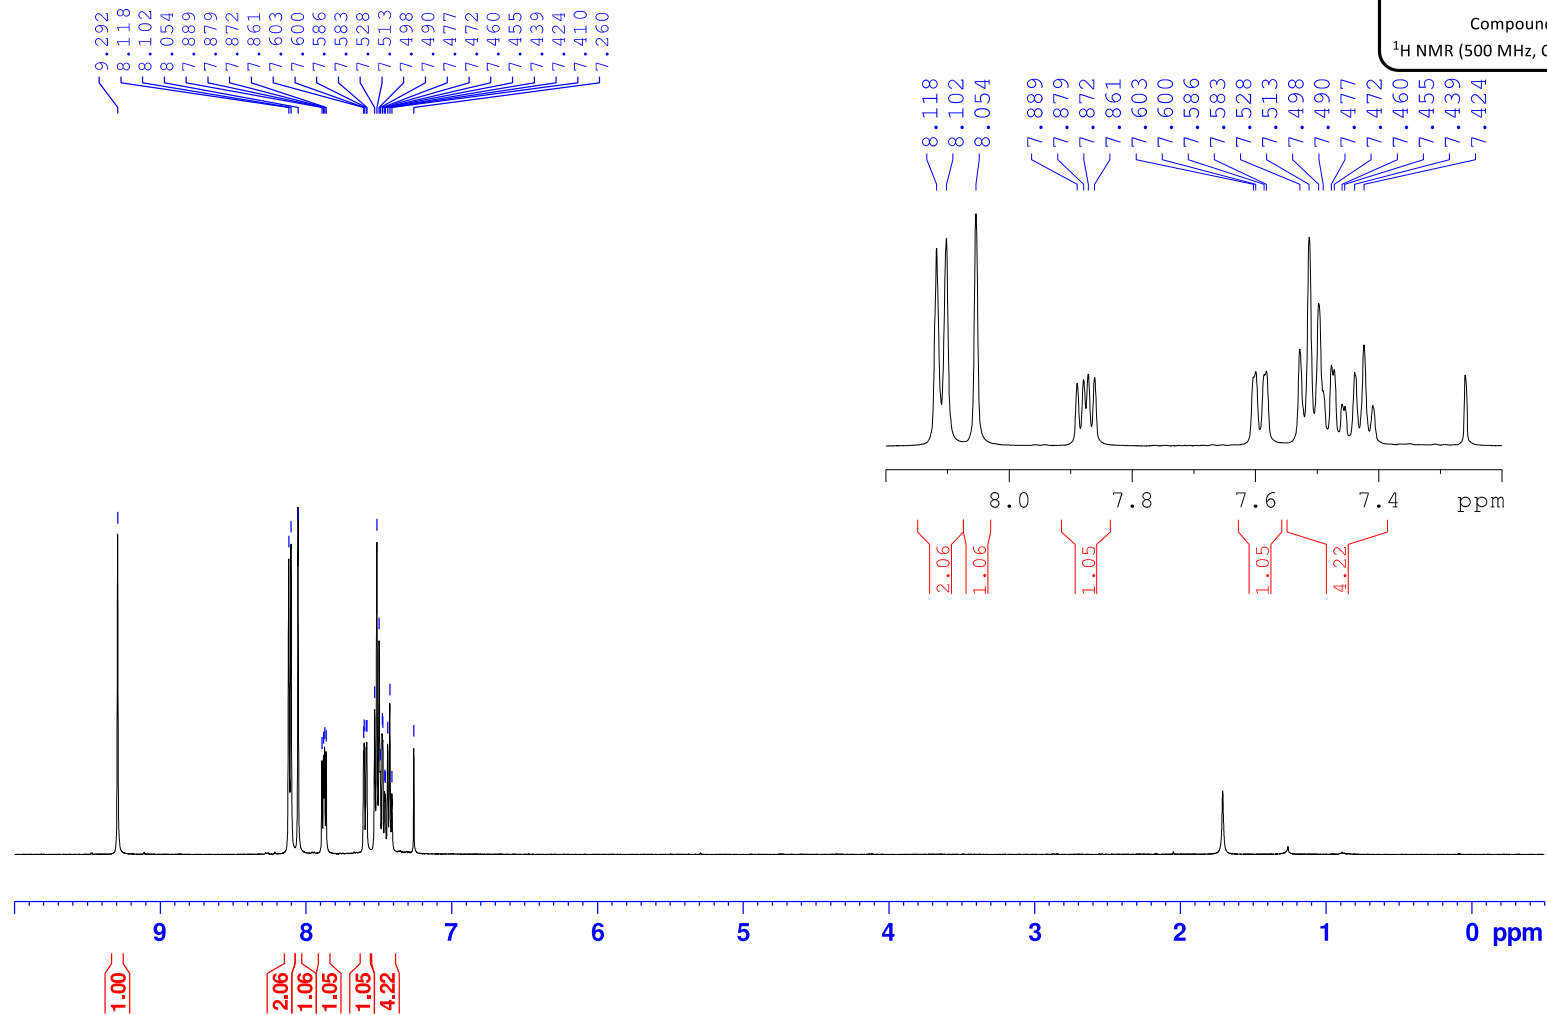

# The $^{13}\text{C}$ NMR spectrum in $\text{CDCl}_3$ of compound 1j.

13C CYL-746 sep 13 0125

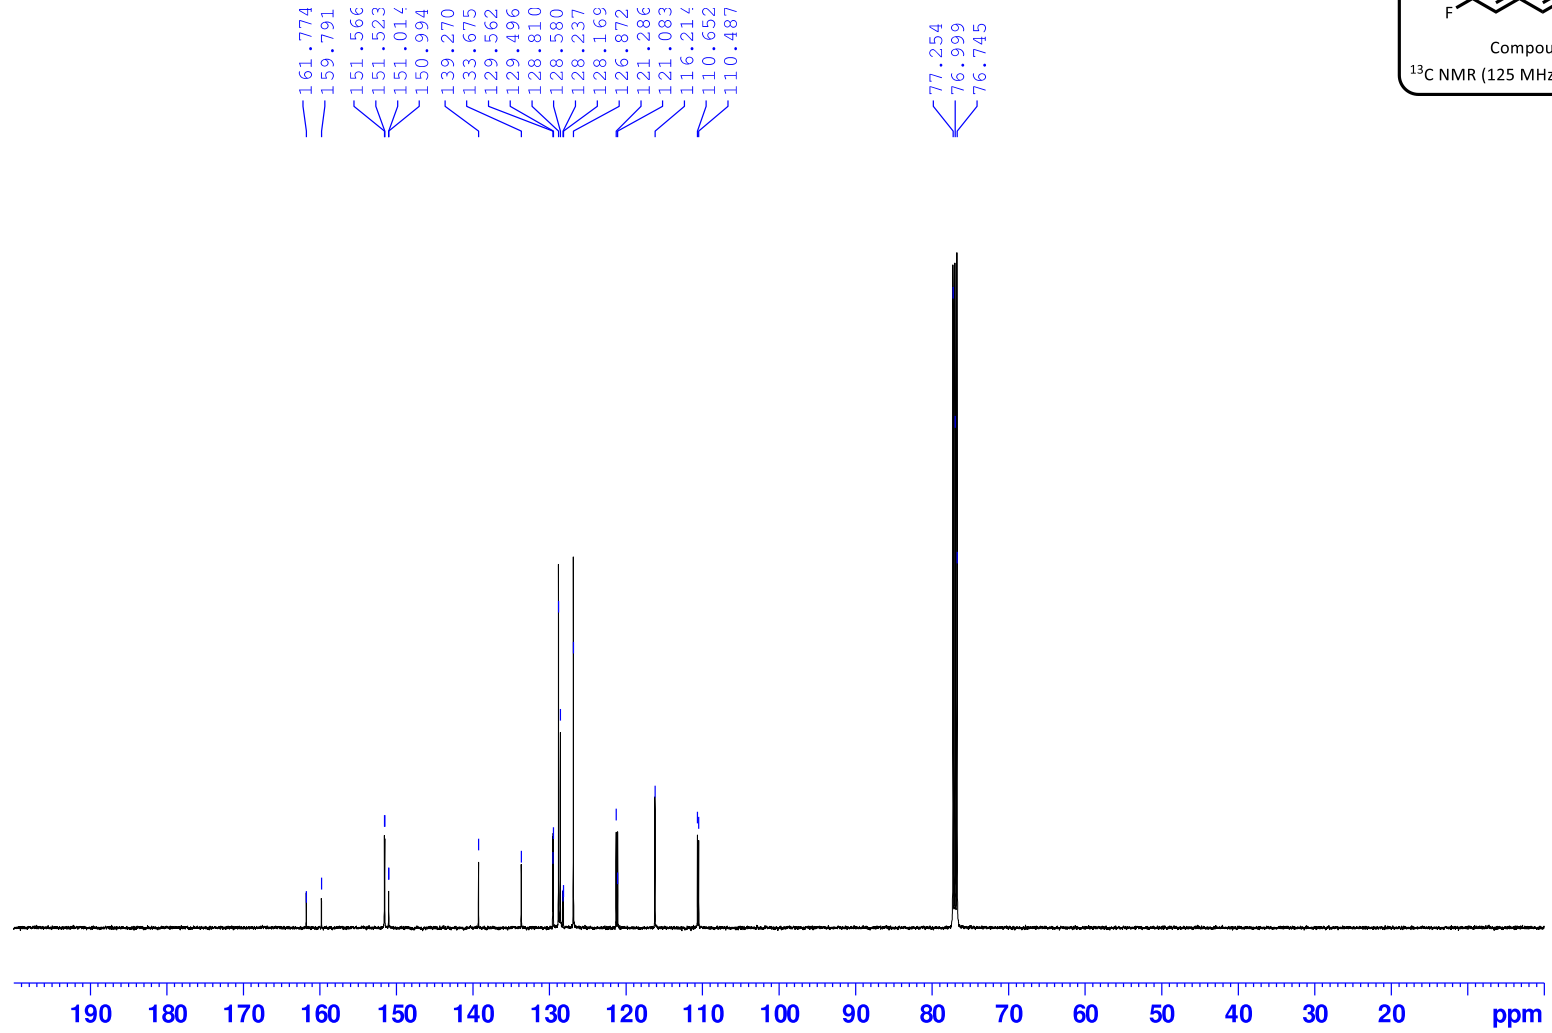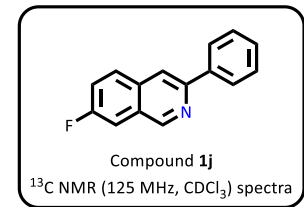

# The <sup>1</sup>H NMR spectrum in CDCl<sub>3</sub> of compound 1k.

1H CYL-750 sep 27 0121

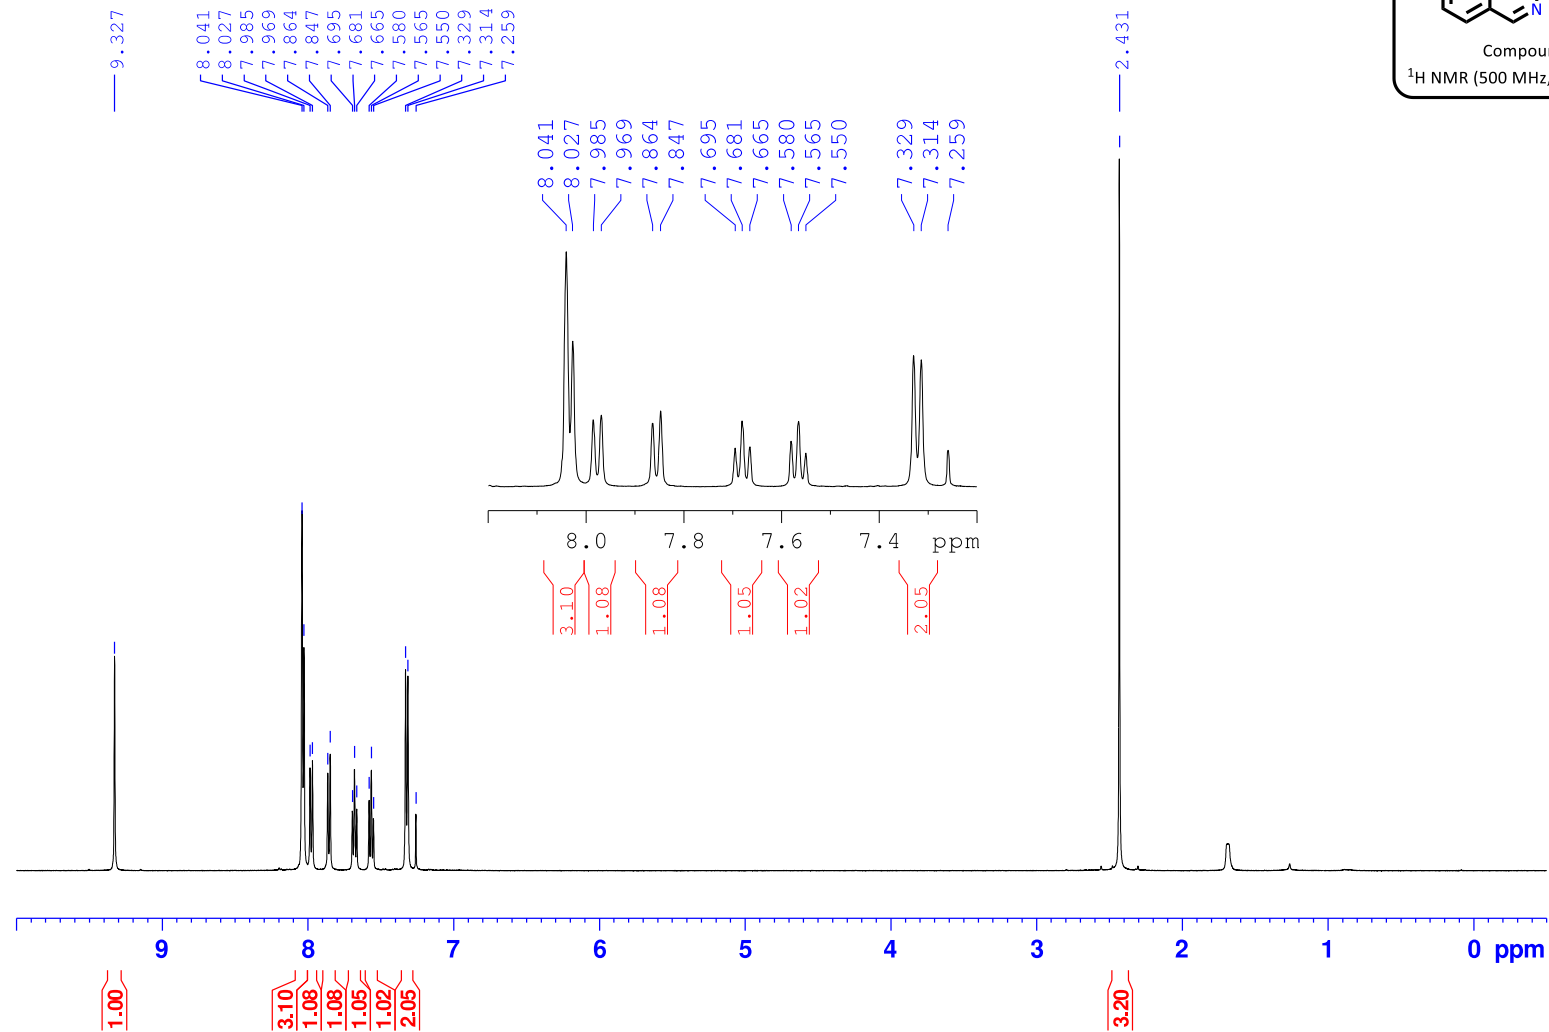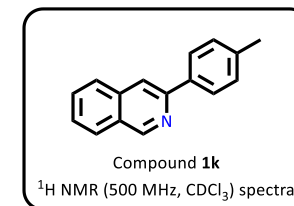

# The $^{13}\text{C}$ NMR spectrum in $\text{CDCl}_3$ of compound 1k.

13C CYL-750 sep 27 0121

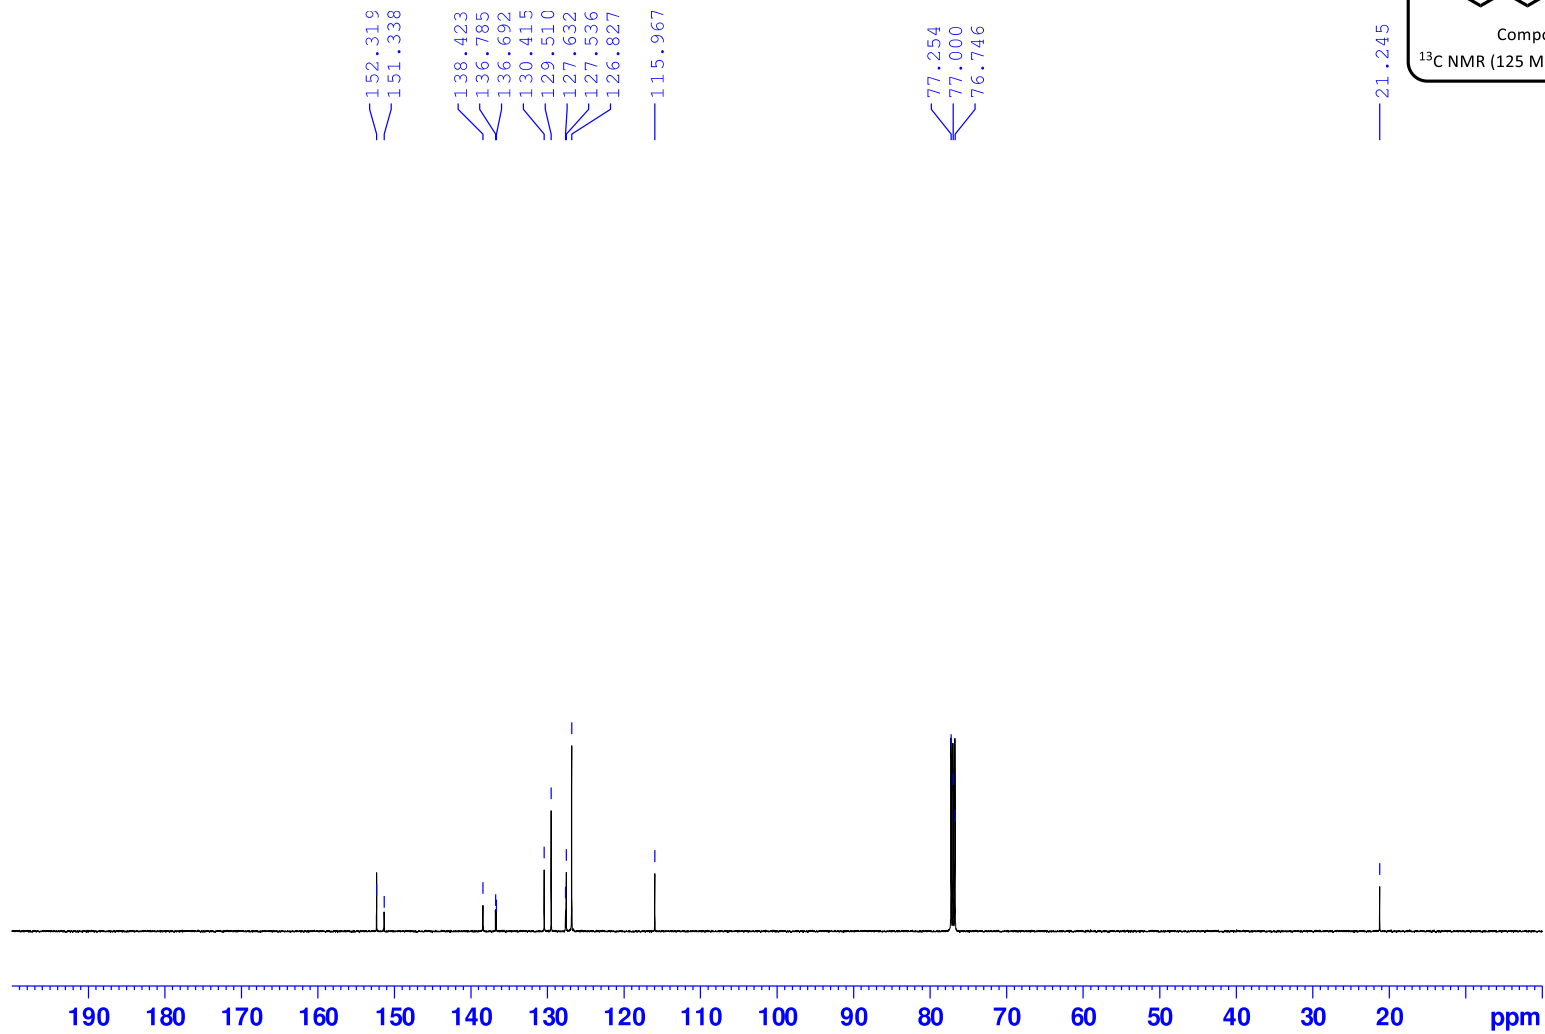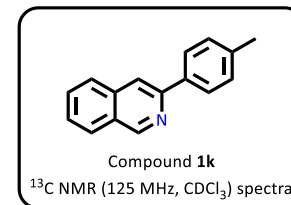



# The $^1\text{H}$ NMR spectrum in $\text{CDCl}_3$ of compound 11.

1H CYL-751 sep 24 0122

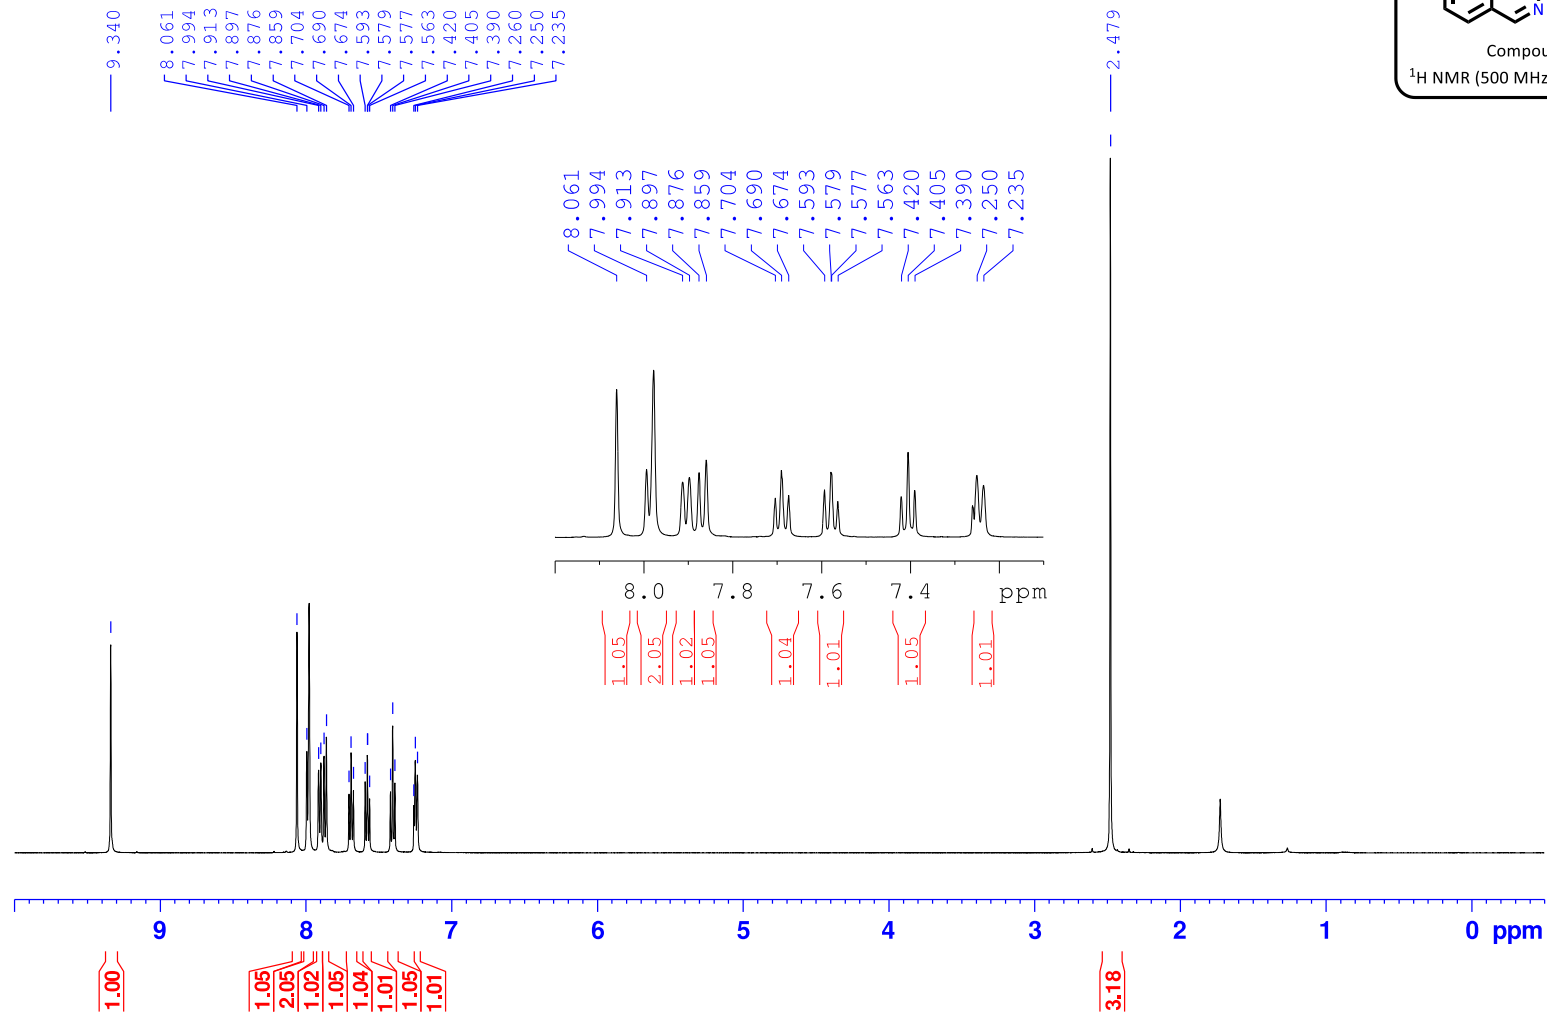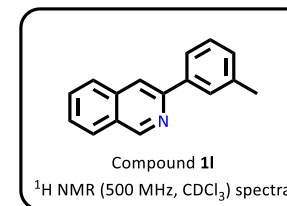

# The $^{13}\text{C}$ NMR spectrum in $\text{CDCl}_3$ of compound **11**.

13C CYL-751 sep 24 0122

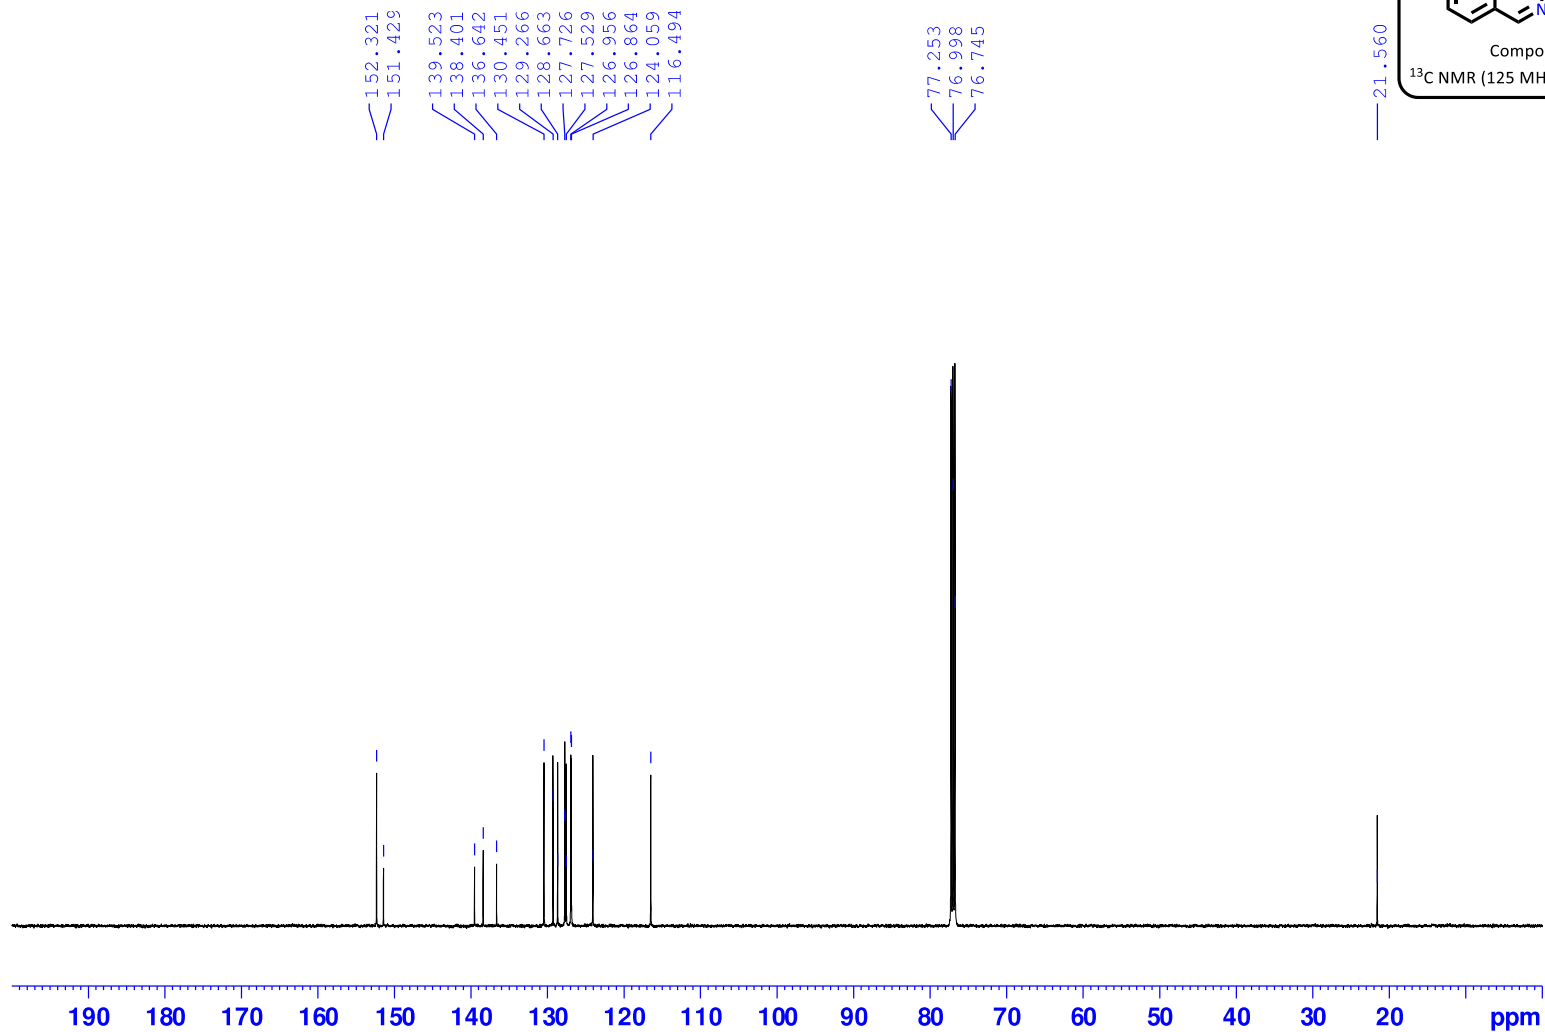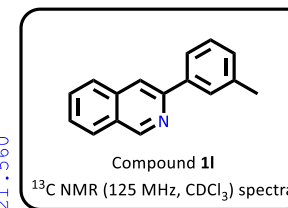

# The $^1\text{H}$ NMR spectrum in $\text{CDCl}_3$ of compound **1m**.

$^1\text{H}$  CYL-760 sep 14 0125

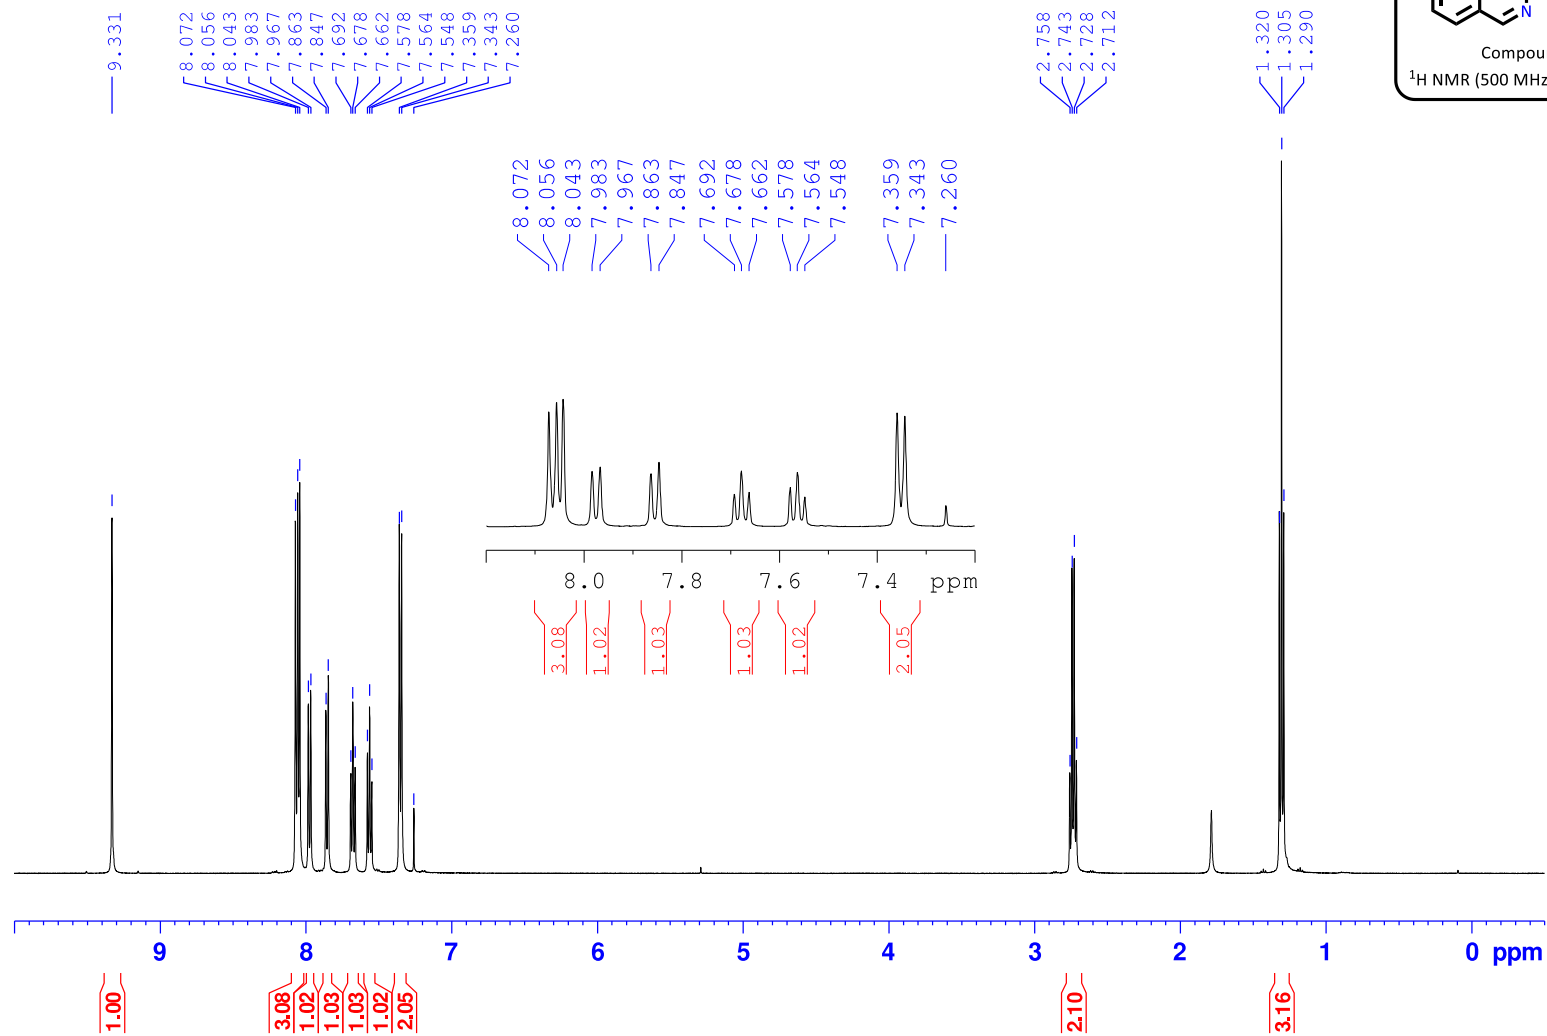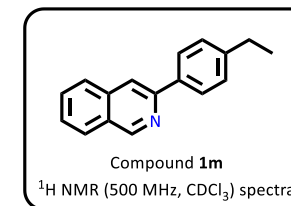

# The $^{13}\text{C}$ NMR spectrum in $\text{CDCl}_3$ of compound 1m.

13C CYL-760 sep 14 0125

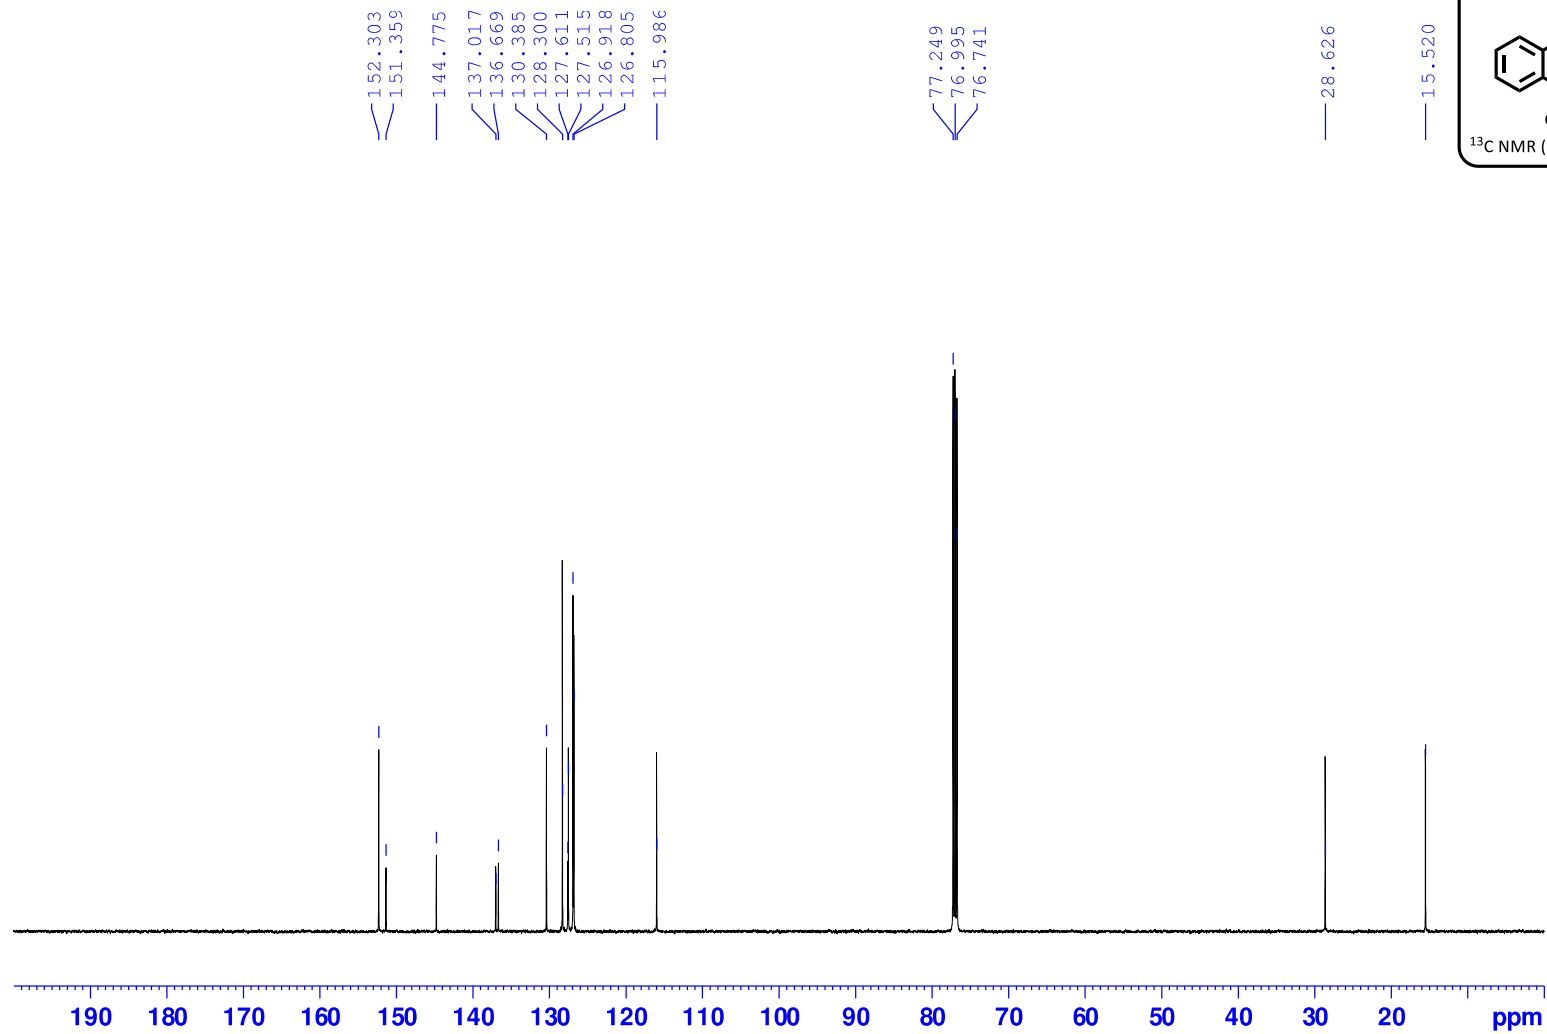

# The $^1\text{H}$ NMR spectrum in $\text{CDCl}_3$ of compound 1n.

1H CYL-756 sep 16 0126

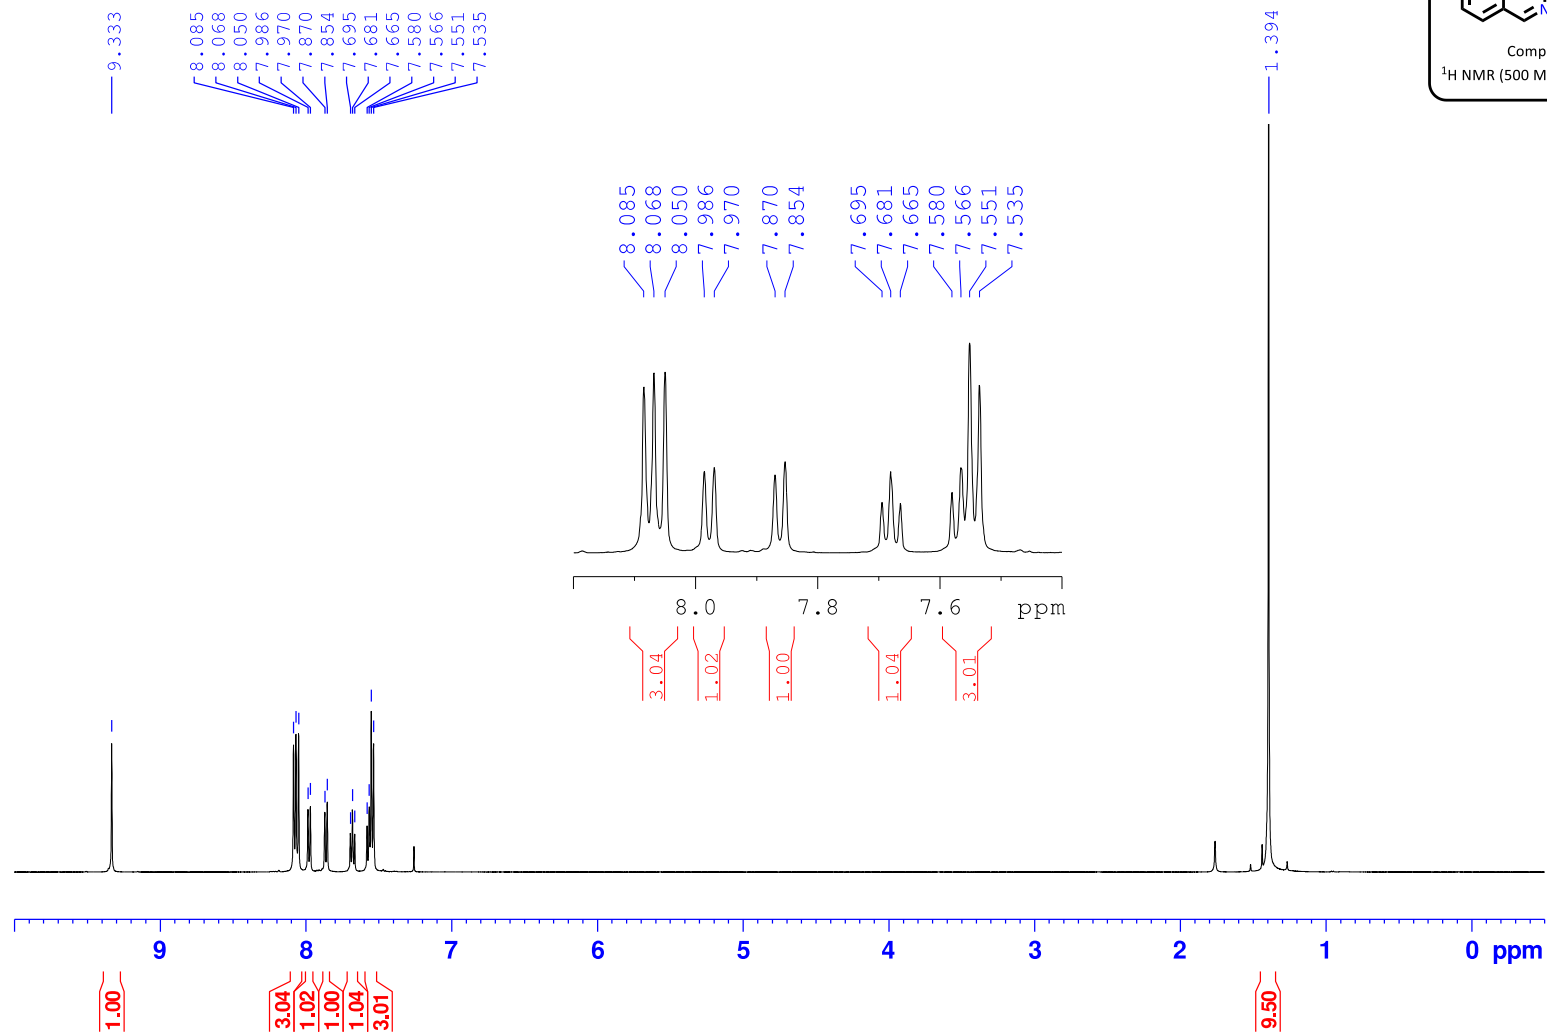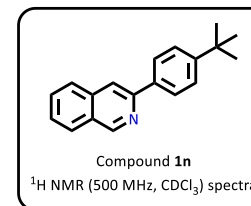

# The $^{13}\text{C}$ NMR spectrum in $\text{CDCl}_3$ of compound 1n.

13C CYL-756 sep 16 0126

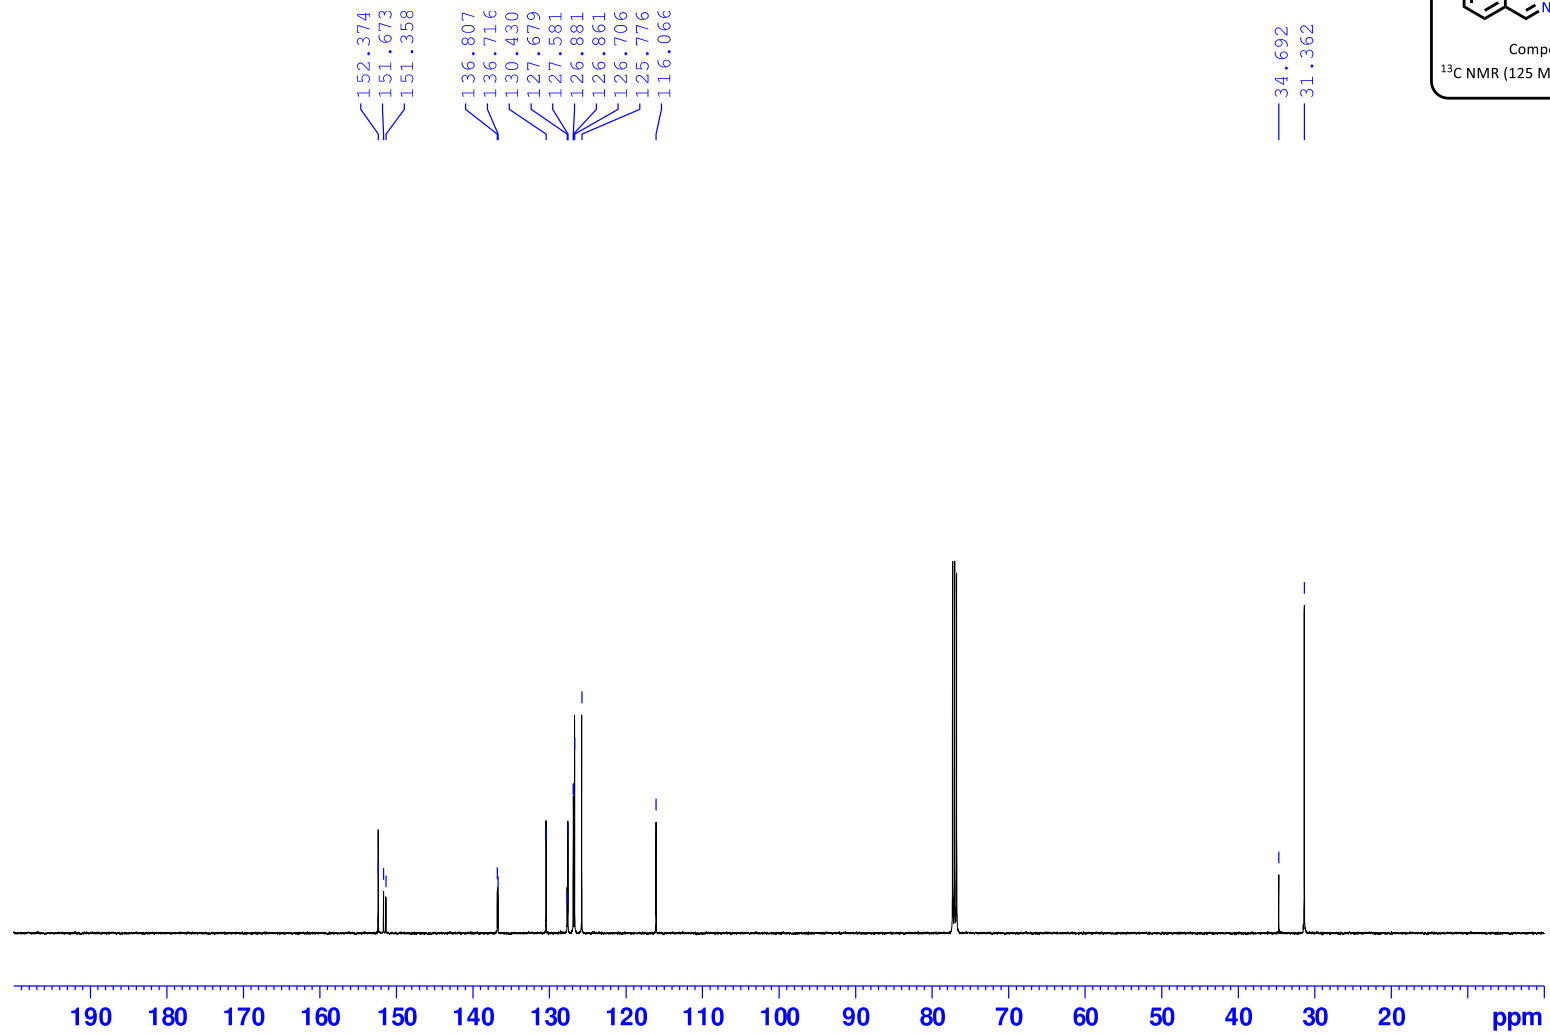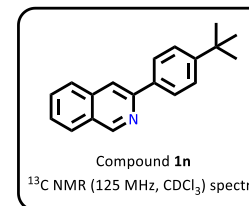

# The $^1\text{H}$ NMR spectrum in $\text{CDCl}_3$ of compound **1o**.

1H CYL-747 sep 4 0126

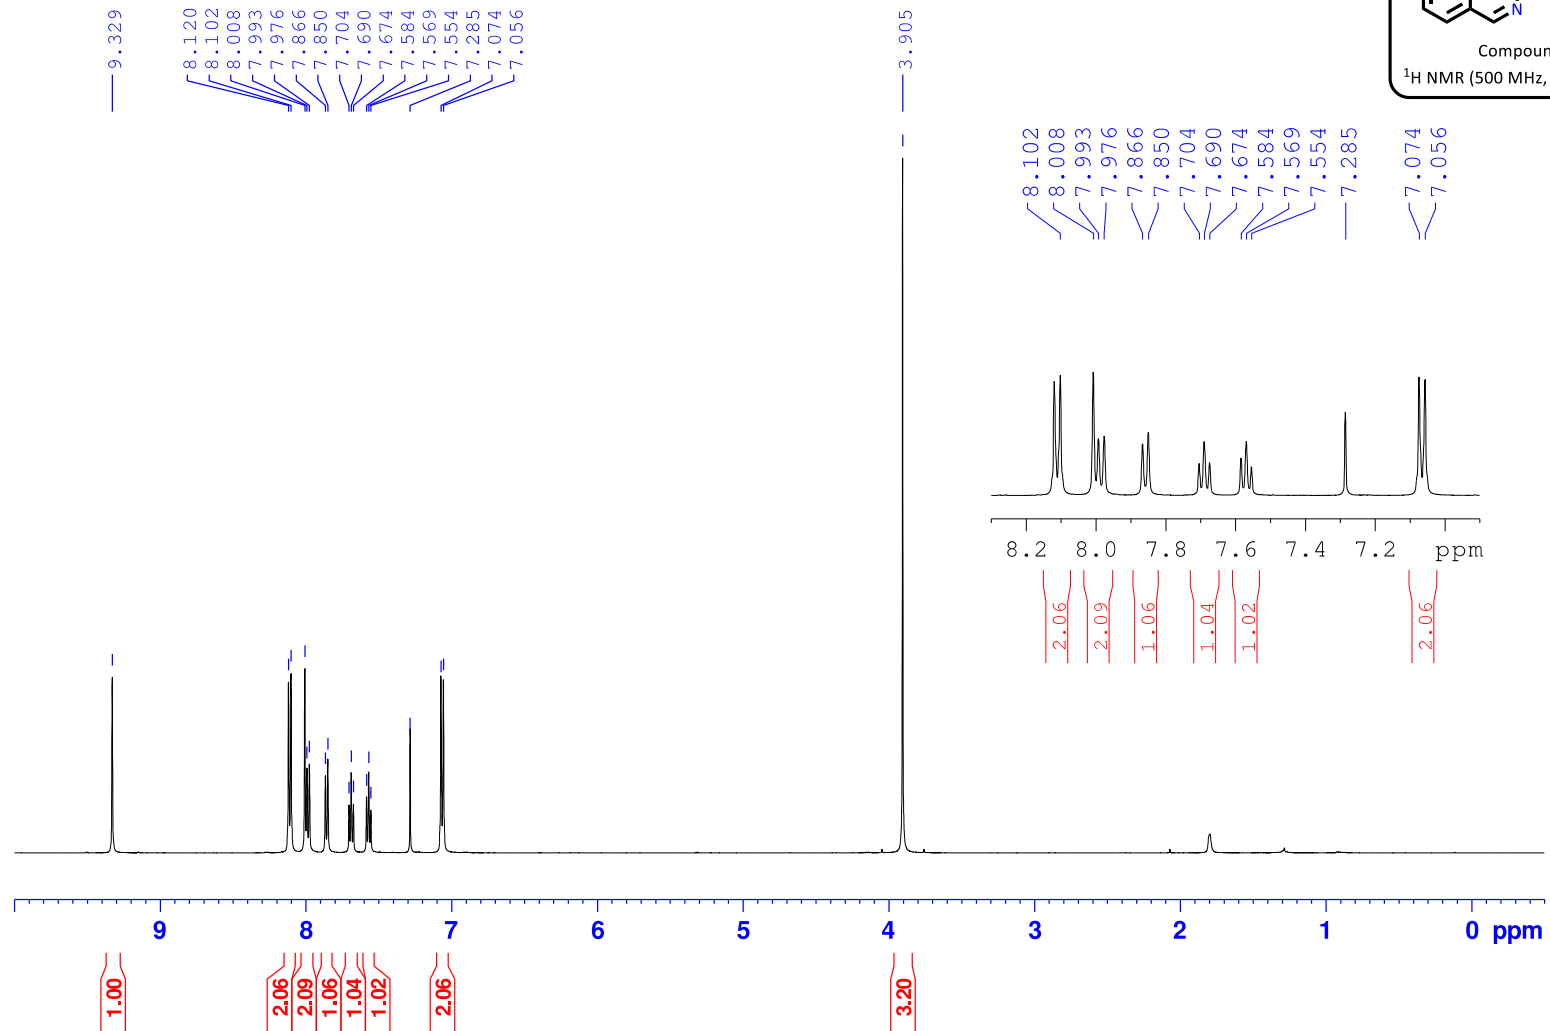

# The $^{13}\text{C}$ NMR spectrum in $\text{CDCl}_3$ of compound 1o.

13C CYL-747 sep 4 0126

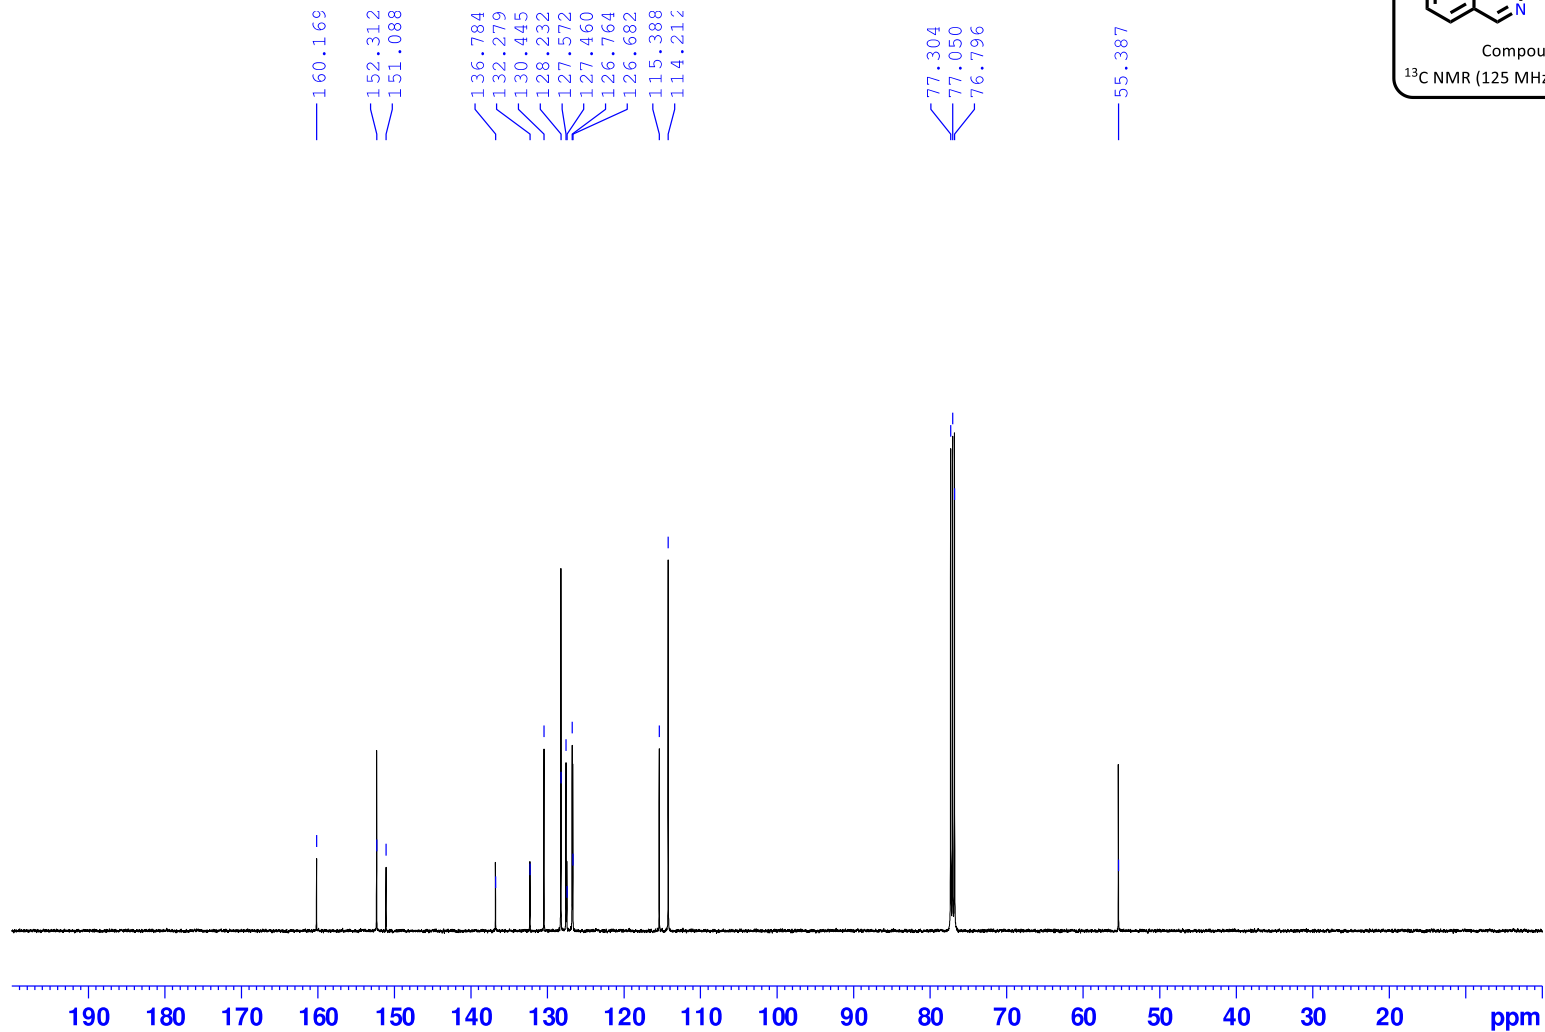



# The <sup>1</sup>H NMR spectrum in CDCl<sub>3</sub> of compound 1p.

1H CYL-748 sep 25 0208

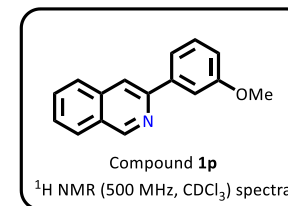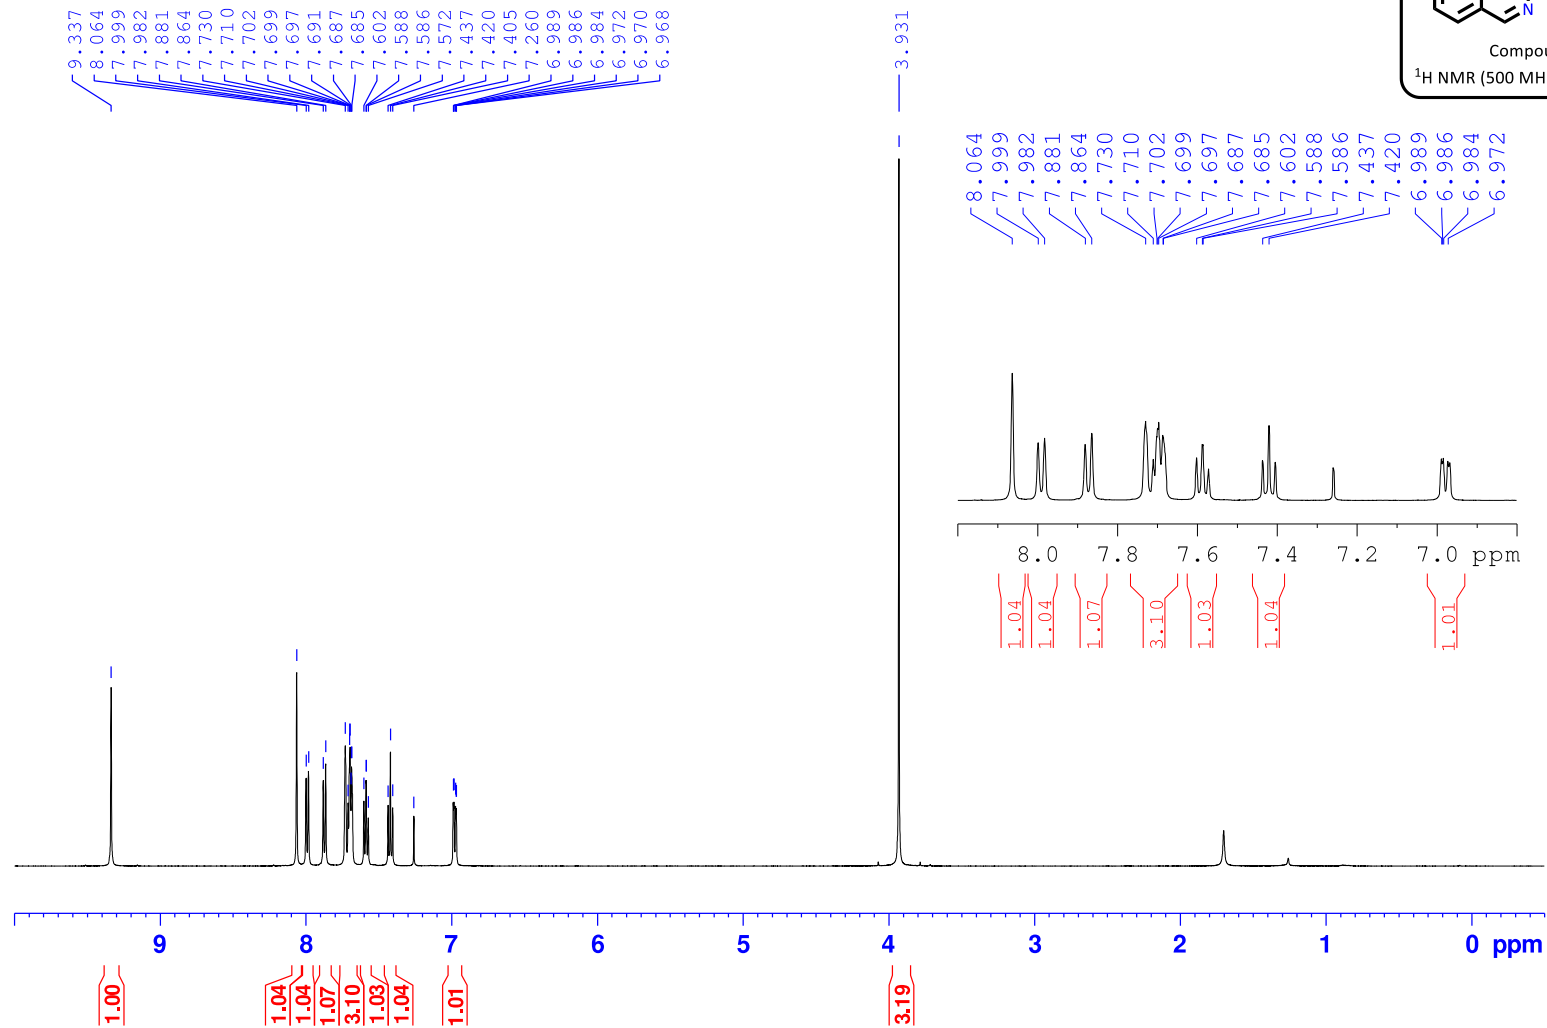

# The $^{13}\text{C}$ NMR spectrum in $\text{CDCl}_3$ of compound 1p.

13C CYL-748 sep 25 0208

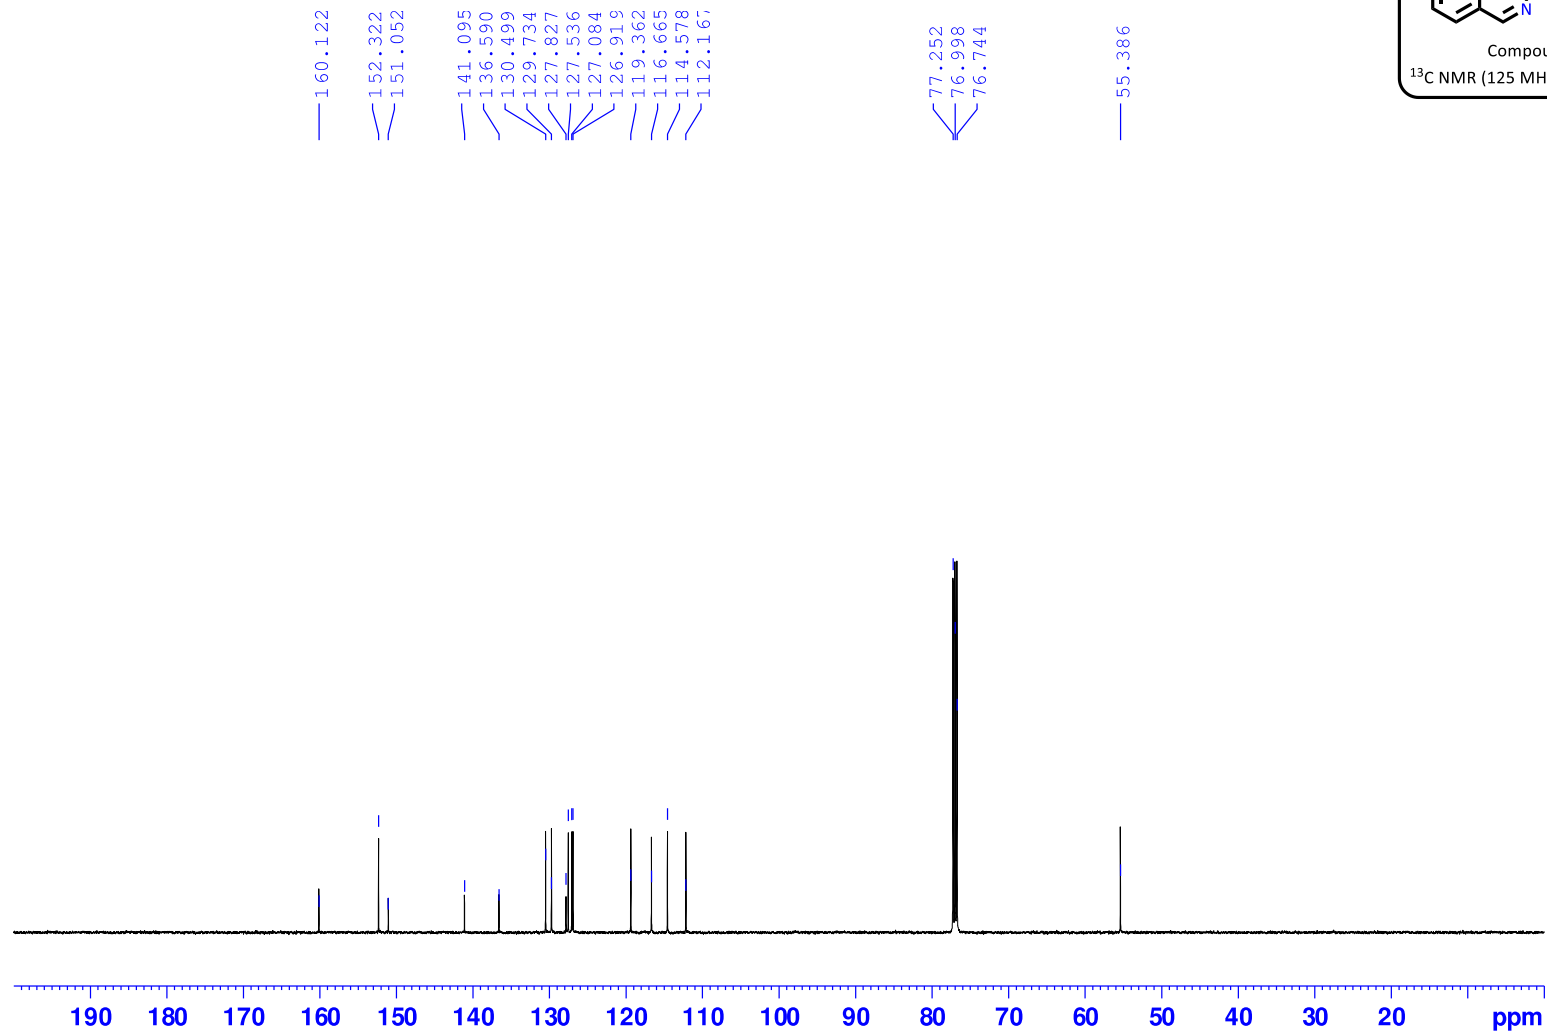

# The <sup>1</sup>H NMR spectrum in CDCl<sub>3</sub> of compound 1q.

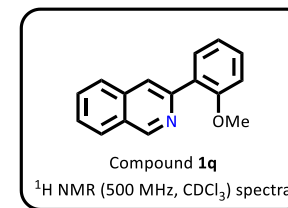

1H CYL-749 sep 32 0208

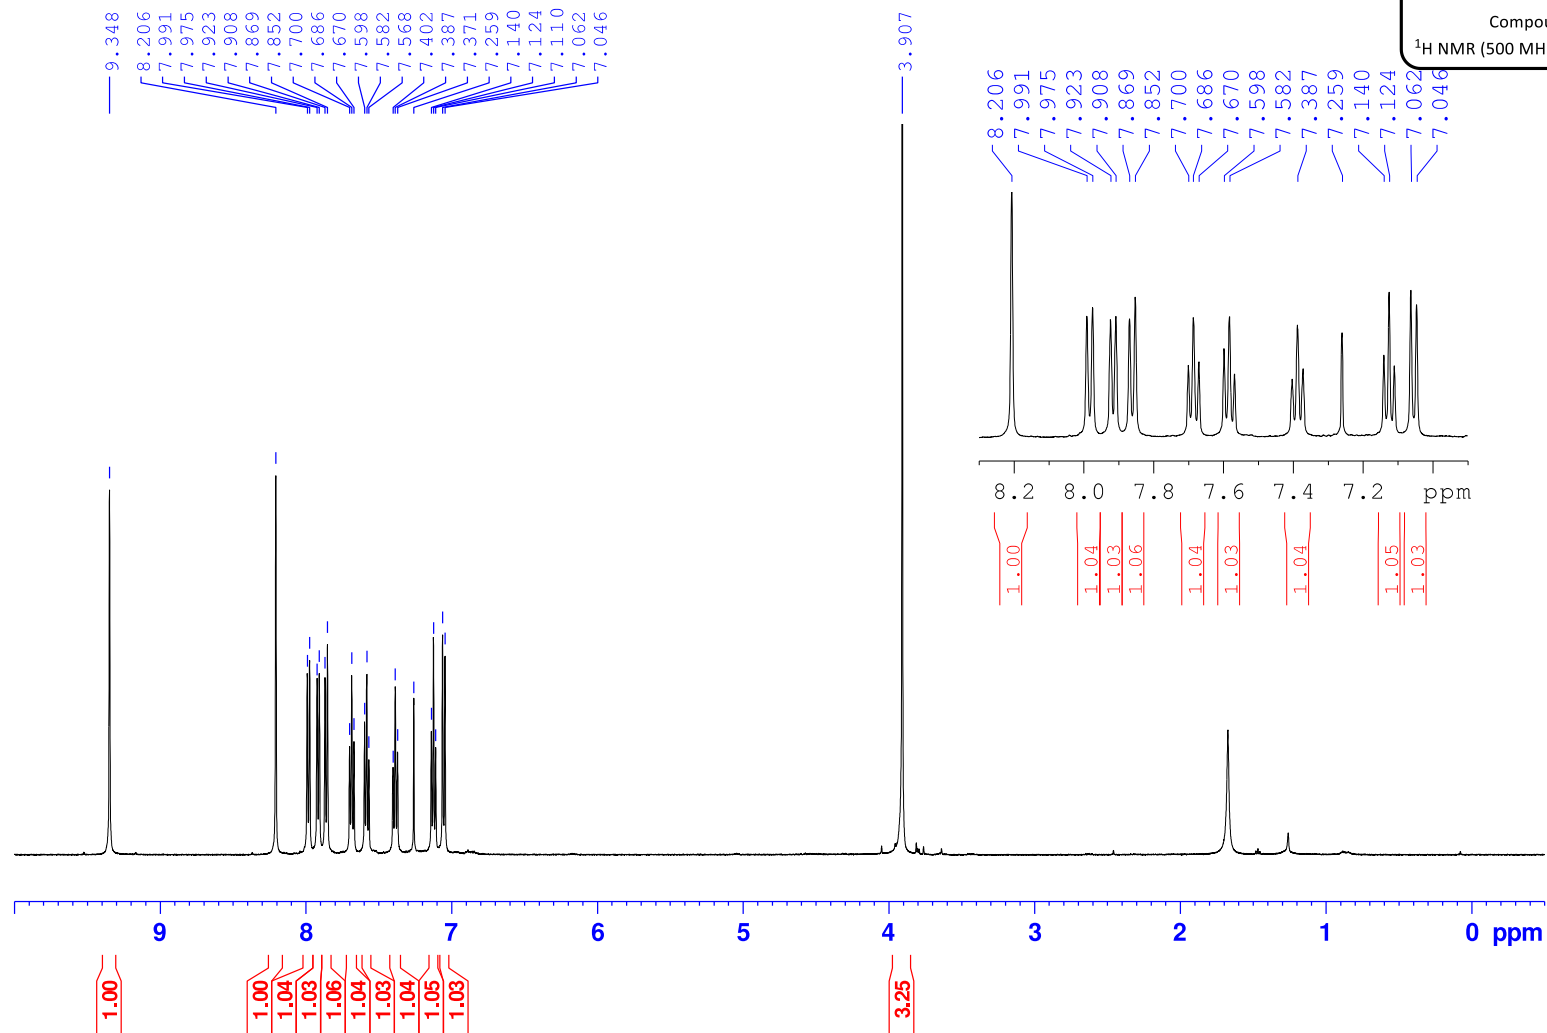

# The $^{13}\text{C}$ NMR spectrum in $\text{CDCl}_3$ of compound 1q.

13C CYL-749 sep 32 0208

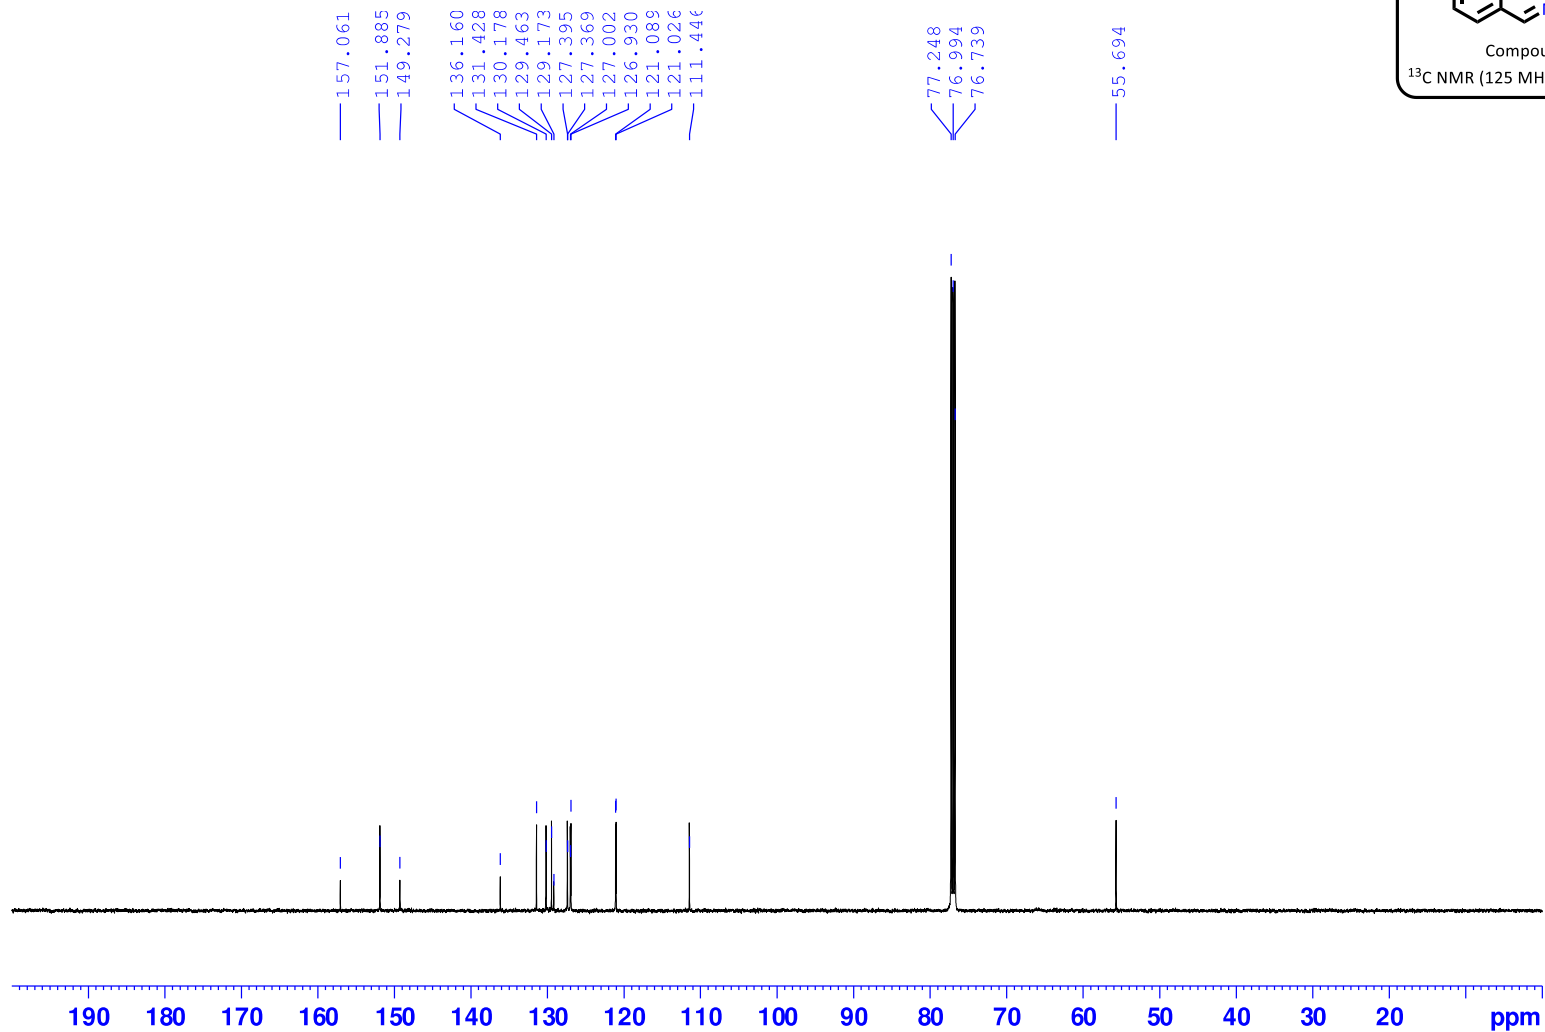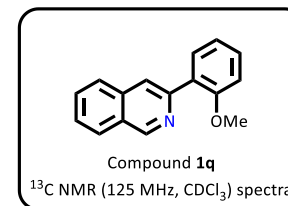

# The $^1\text{H}$ NMR spectrum in $\text{CDCl}_3$ of compound 1r.

1H CYL-752 sep 17 0209

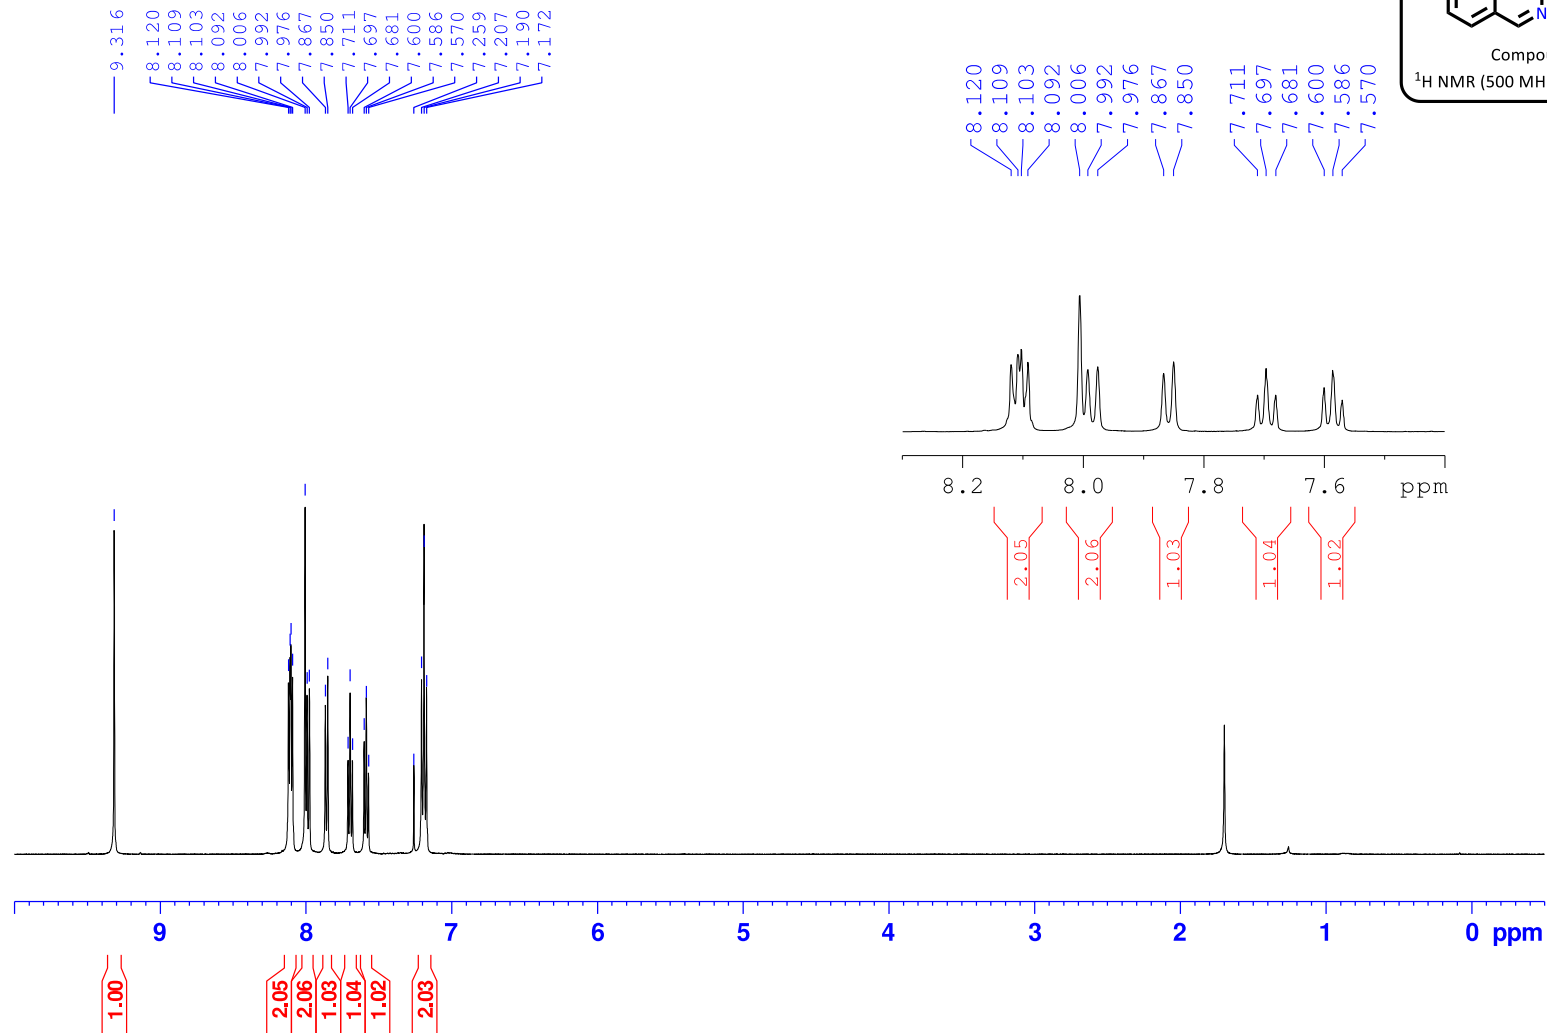

# The $^{13}\text{C}$ NMR spectrum in $\text{CDCl}_3$ of compound 1r.

13C CYL-752 sep 17 0209

164.232  
162.260  
152.414  
150.307  
136.605  
135.750  
135.727  
130.601  
128.733  
128.667  
127.639  
127.553  
127.092  
126.819  
116.148  
115.730  
115.559  
77.251  
76.997  
76.743

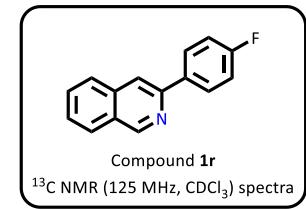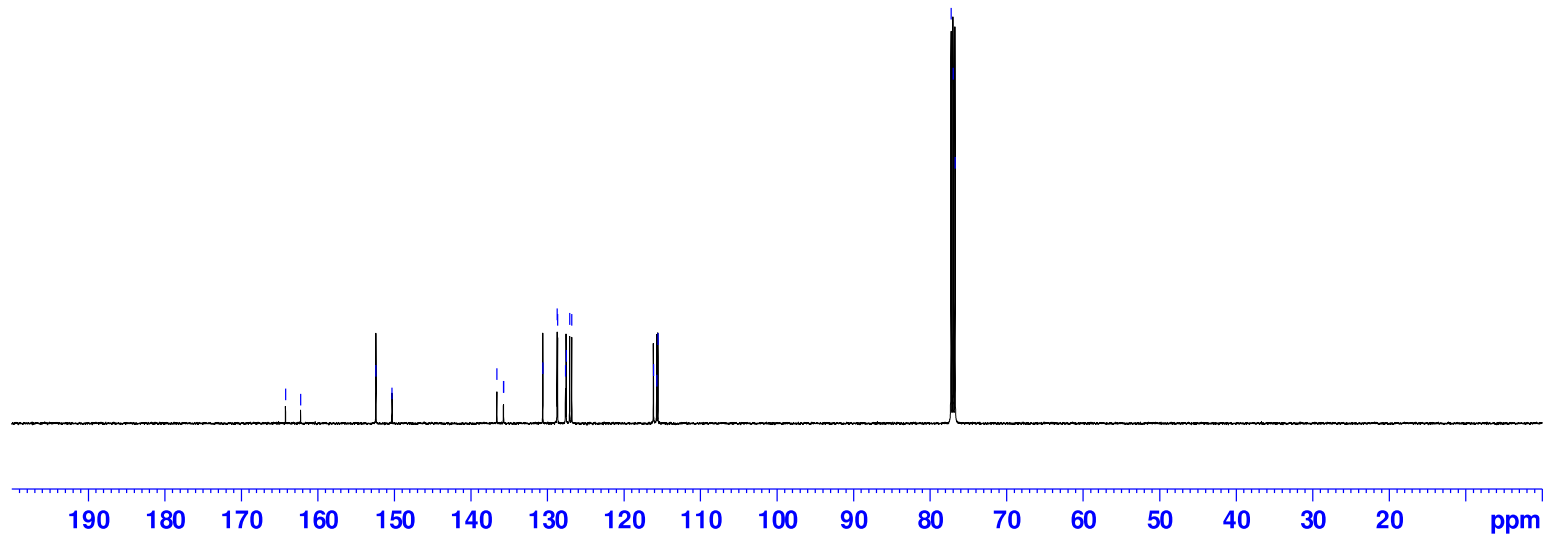

# The <sup>1</sup>H NMR spectrum in CDCl<sub>3</sub> of compound 1s.

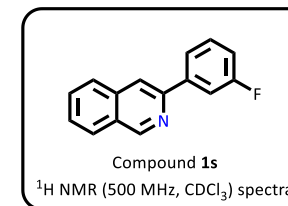

<sup>1</sup>H CYL-753 sep 16 0211

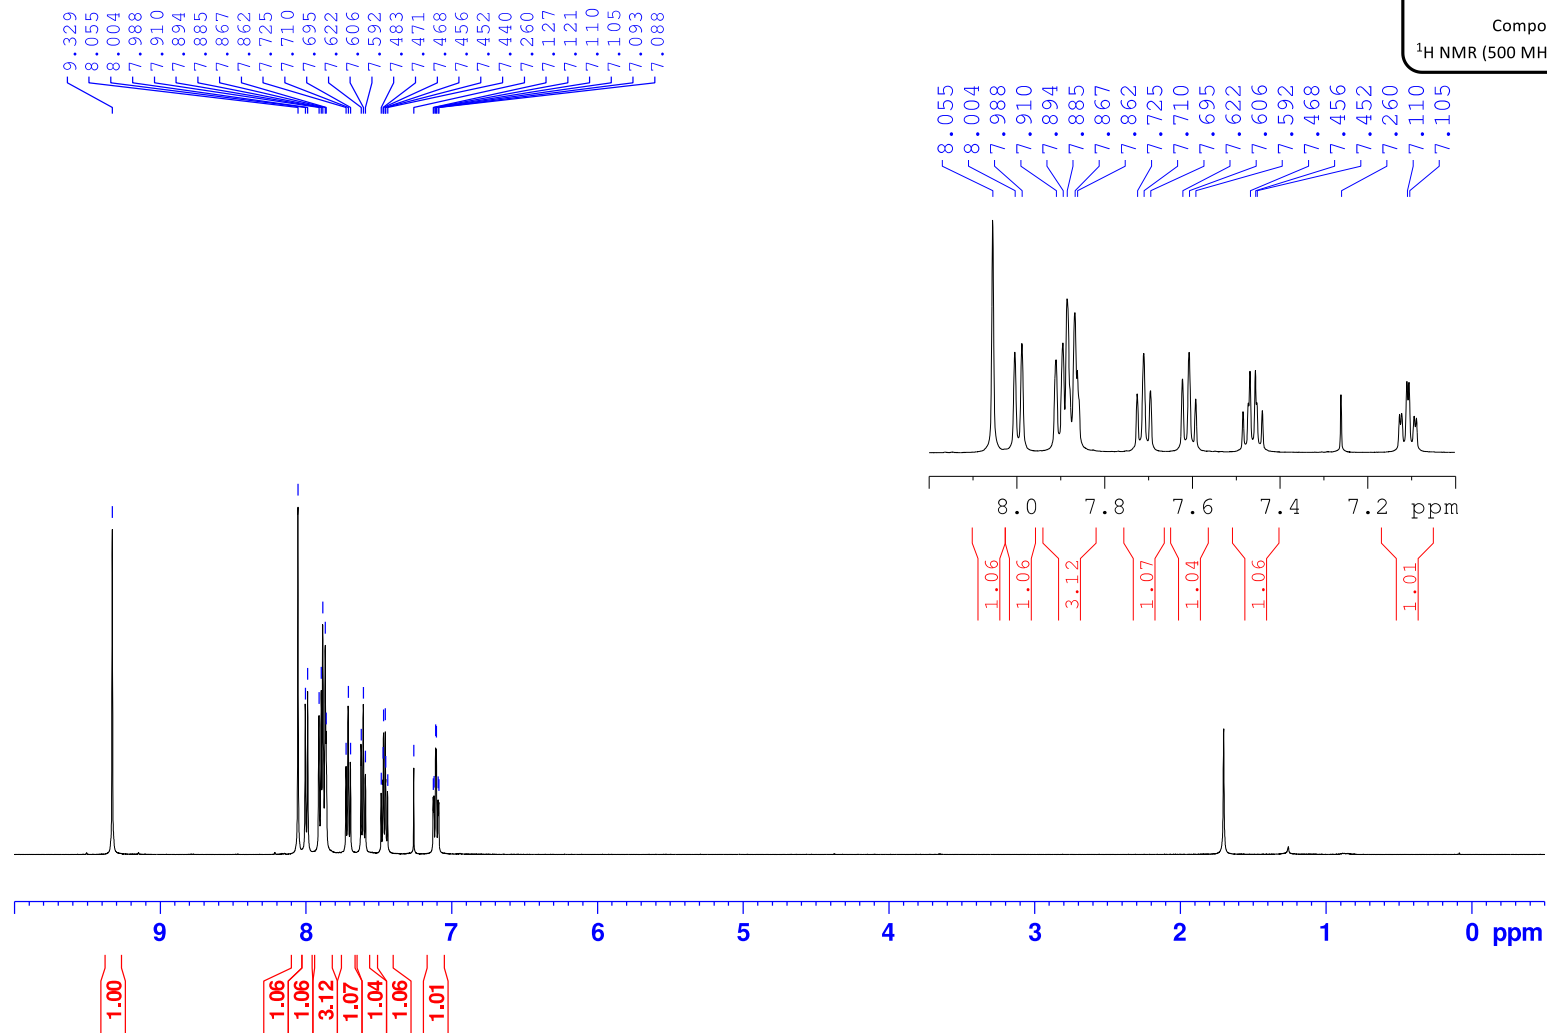

# The $^{13}\text{C}$ NMR spectrum in $\text{CDCl}_3$ of compound 1s.

13C CYL-753 sep 16 0211

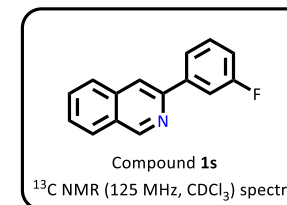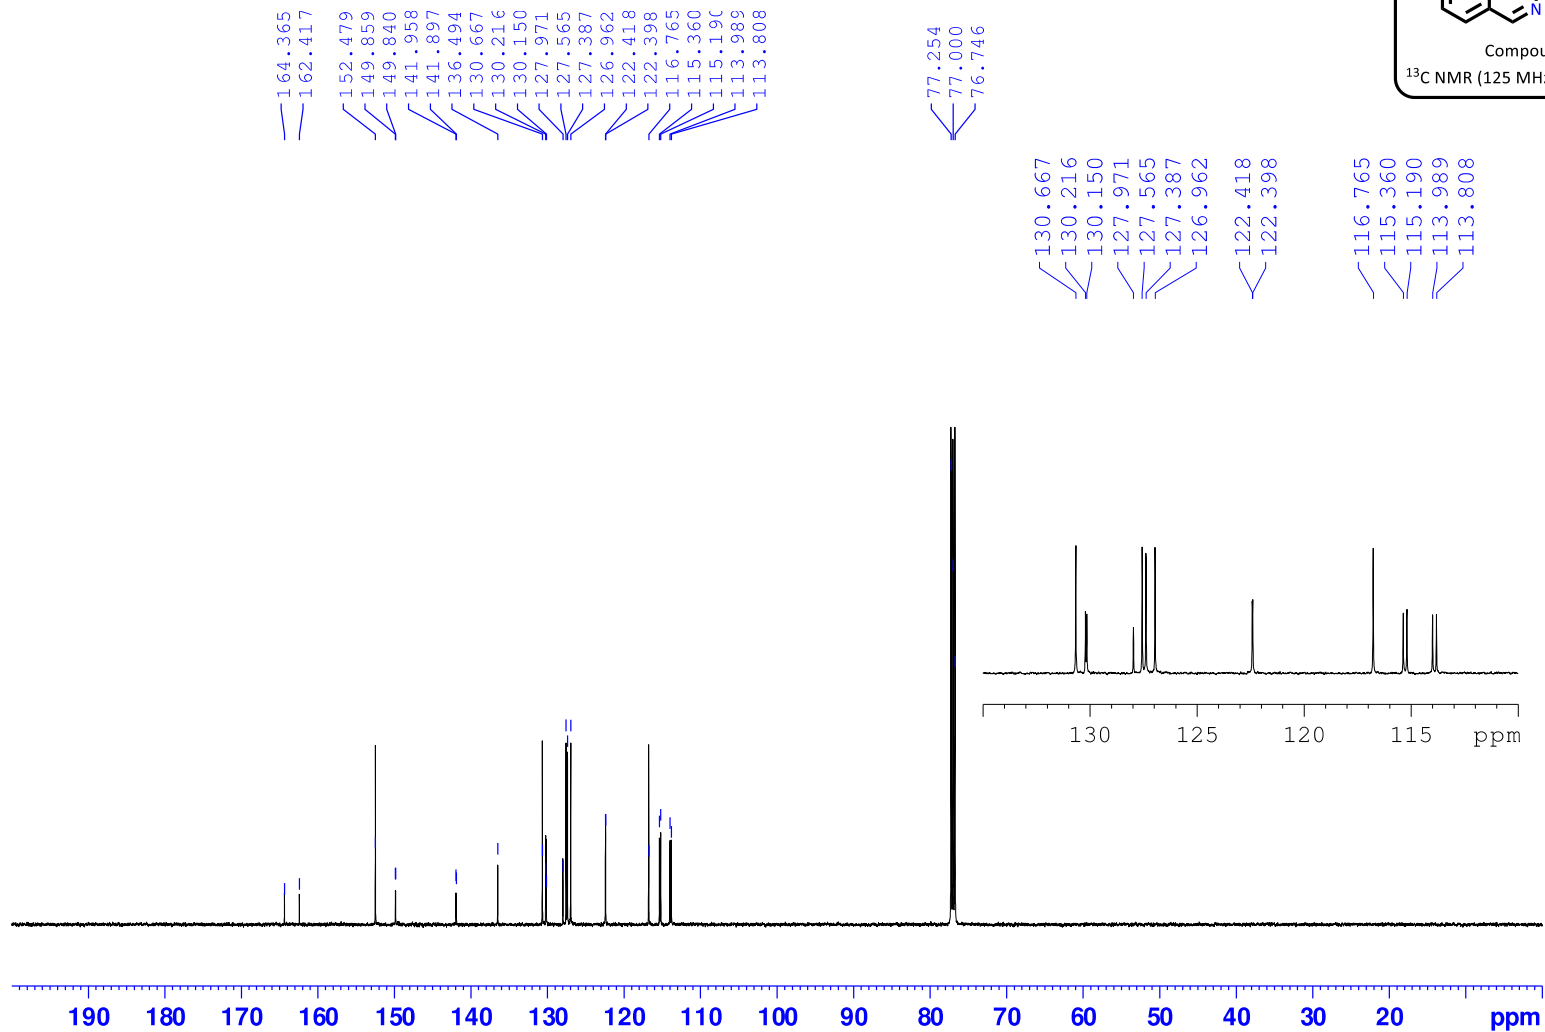



# The <sup>1</sup>H NMR spectrum in CDCl<sub>3</sub> of compound 1t.

1H CYL-754 sep 17 0210

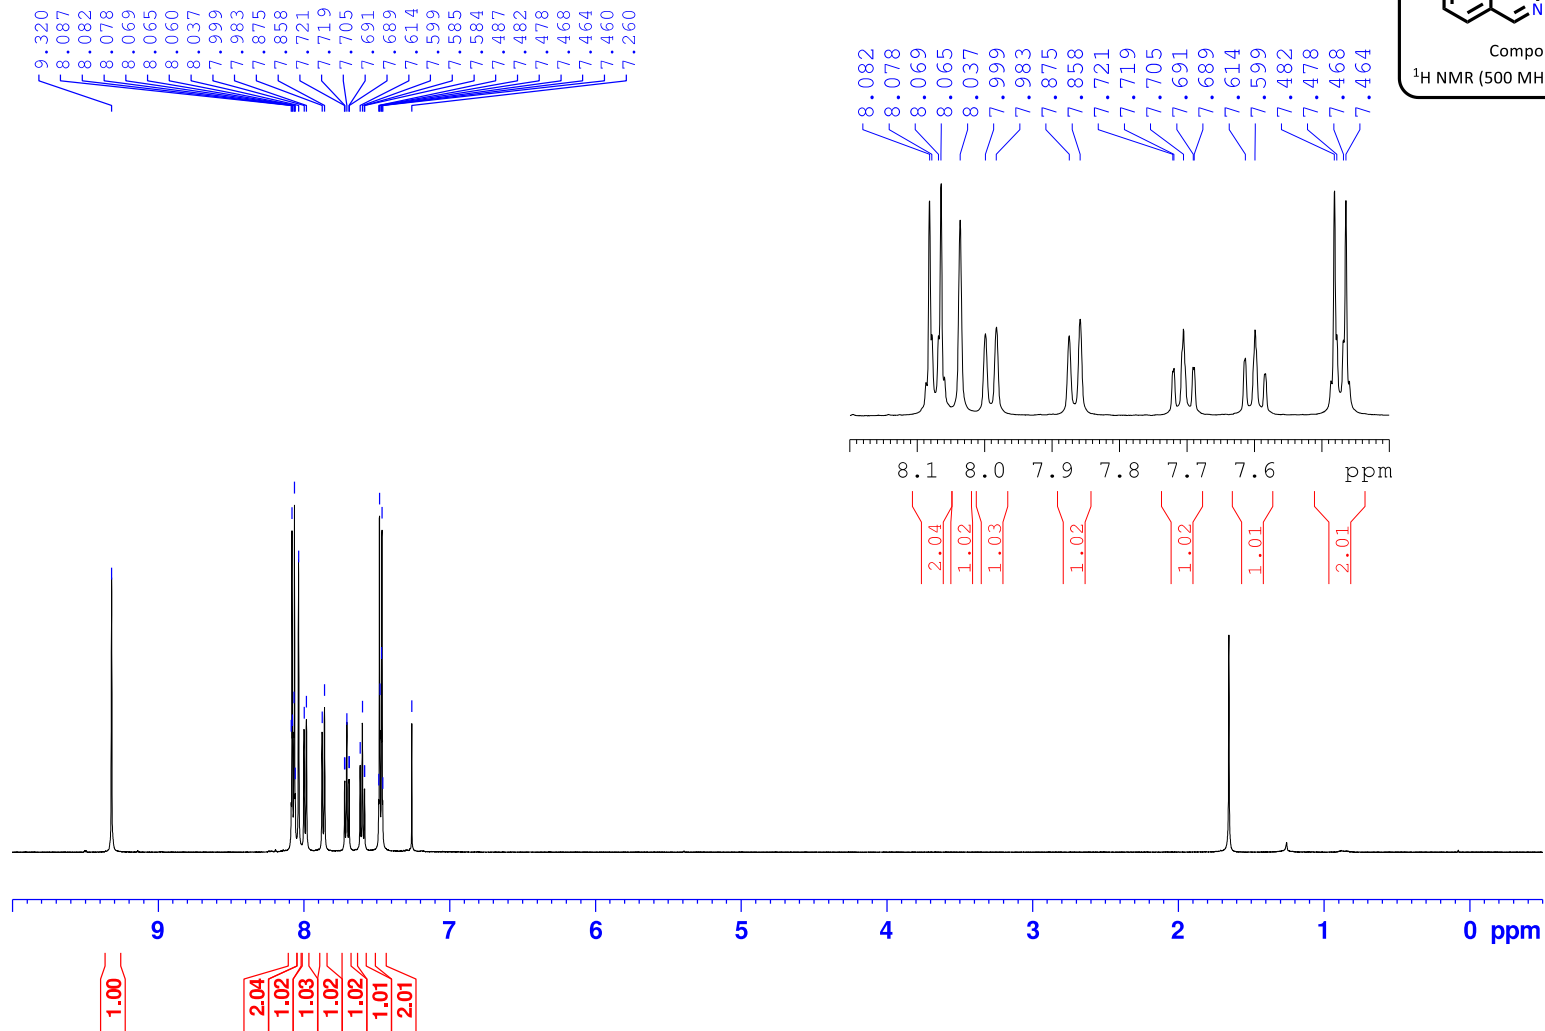

# The $^{13}\text{C}$ NMR spectrum in $\text{CDCl}_3$ of compound 1t.

13C CYL-754 sep 17 0210

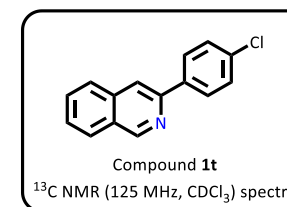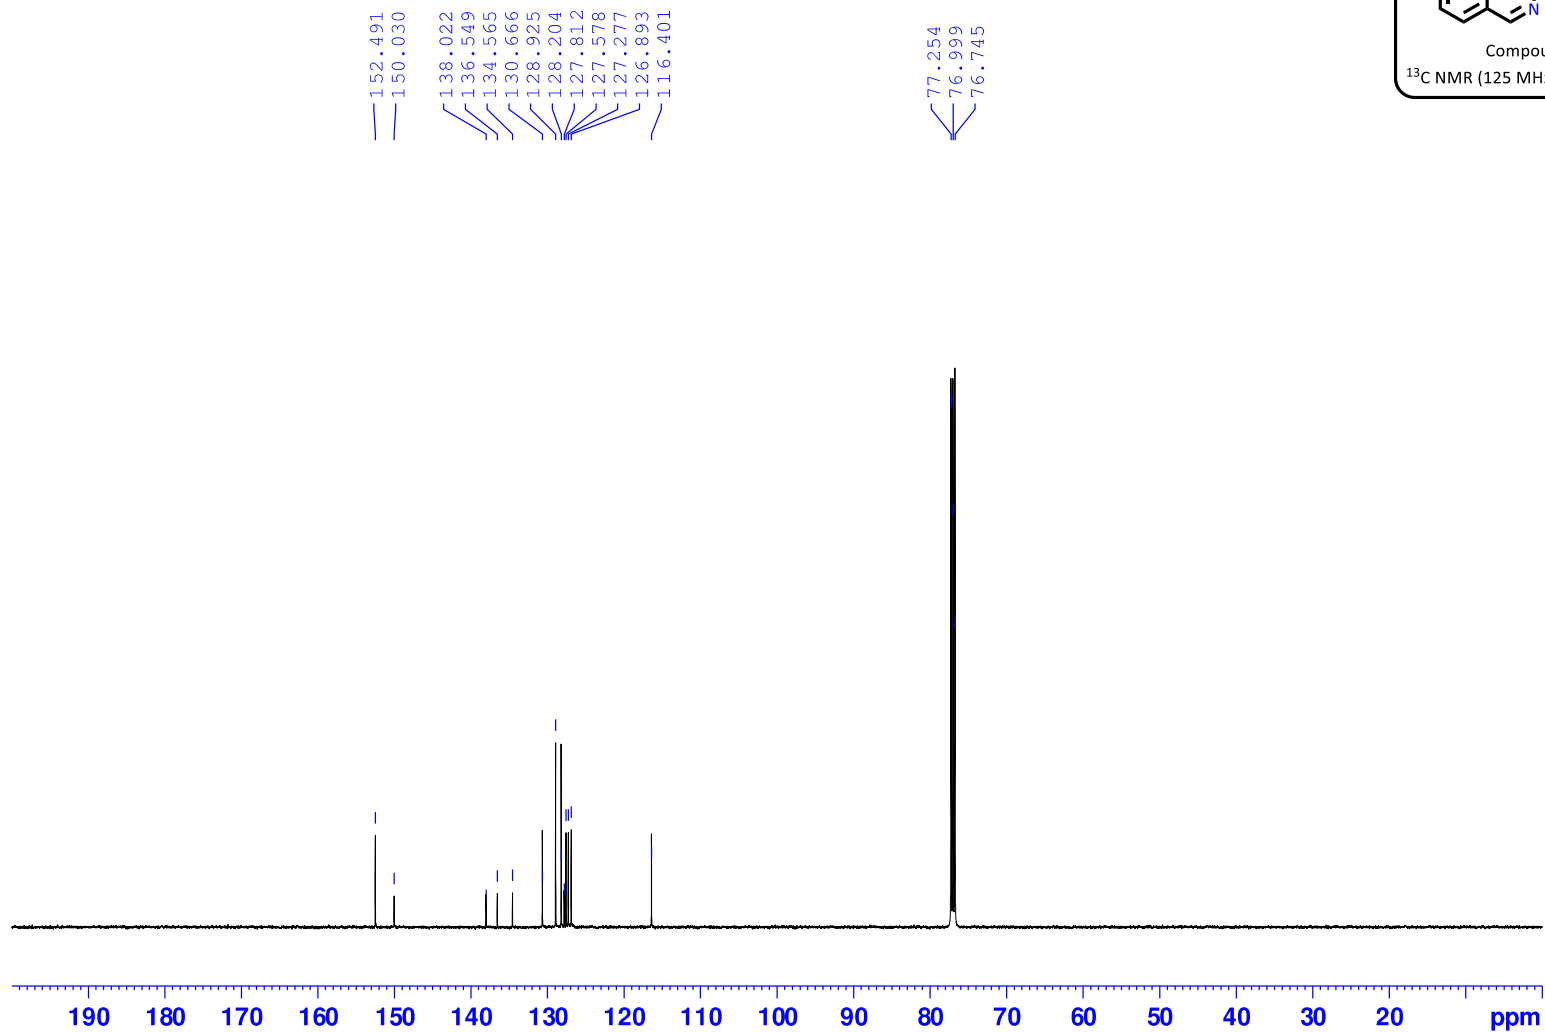

# The $^1\text{H}$ NMR spectrum in $\text{CDCl}_3$ of compound **1u**.

1H CYL-755 sep 16 0210

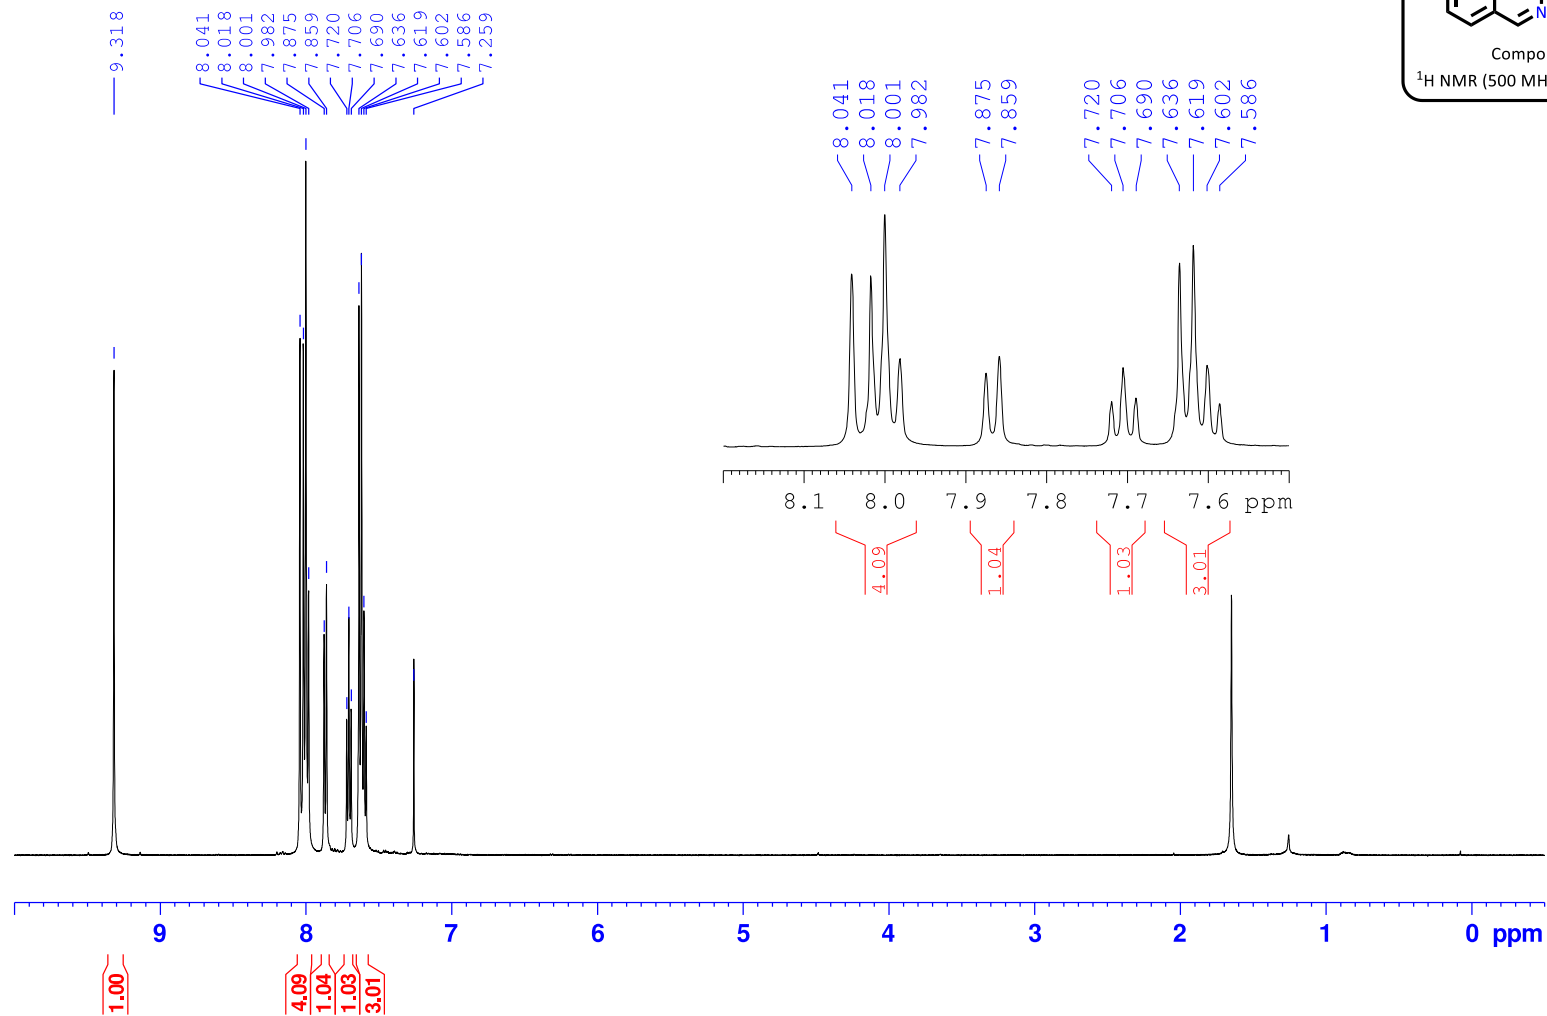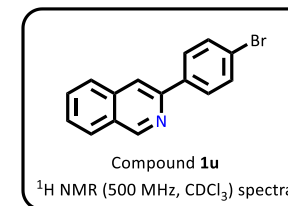

# The $^{13}\text{C}$ NMR spectrum in $\text{CDCl}_3$ of compound 1u.

13C CYL-755 sep 16 0210

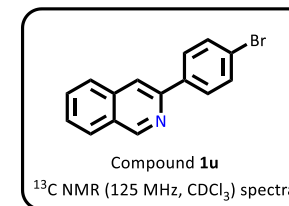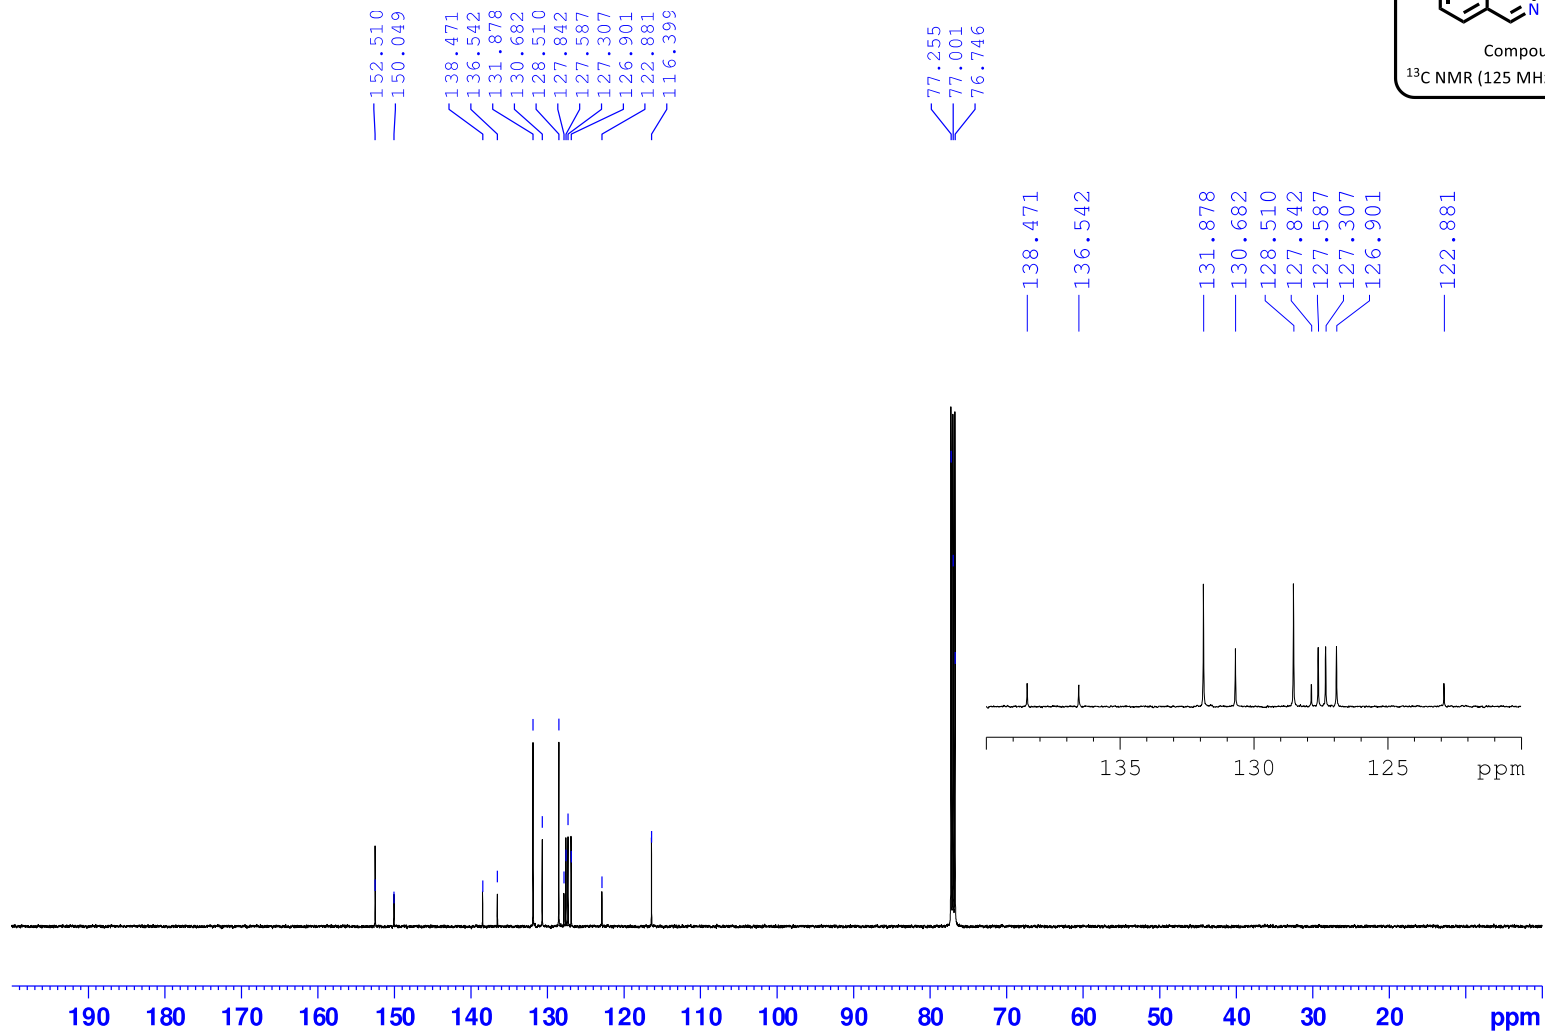

# The $^1\text{H}$ NMR spectrum in $\text{CDCl}_3$ of compound 1v.

1H CYL-757 sep 1415 0211

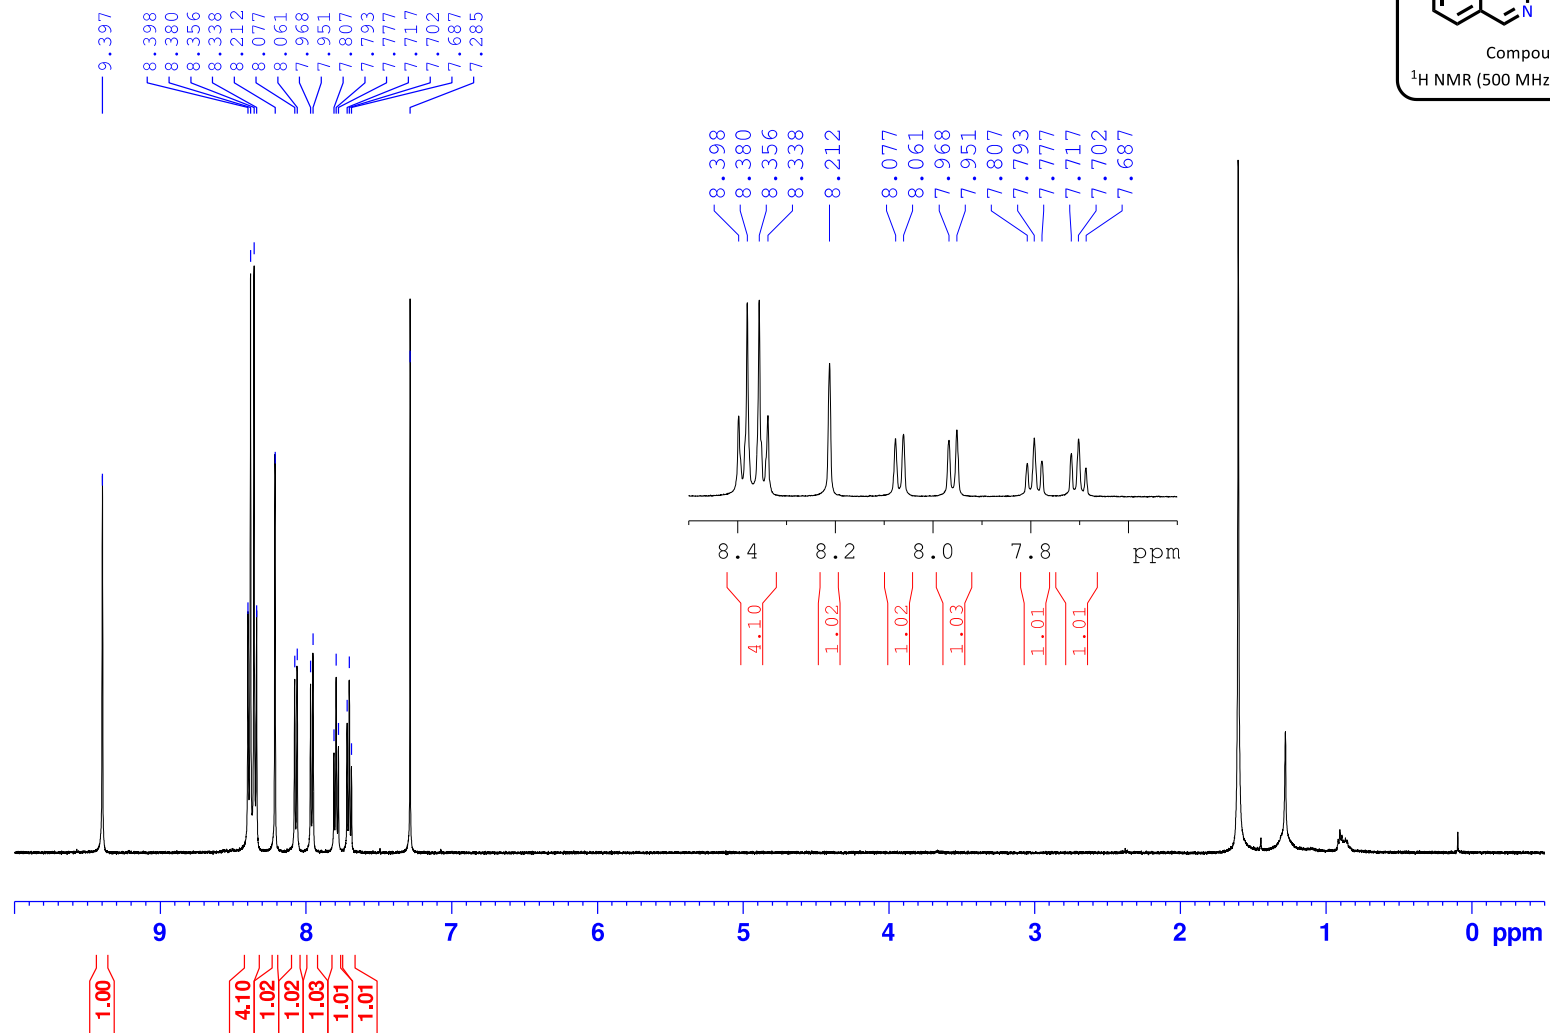

# The $^{13}\text{C}$ NMR spectrum in $\text{CDCl}_3$ of compound **1v**.

13C CYL-757 sep 1415 0211

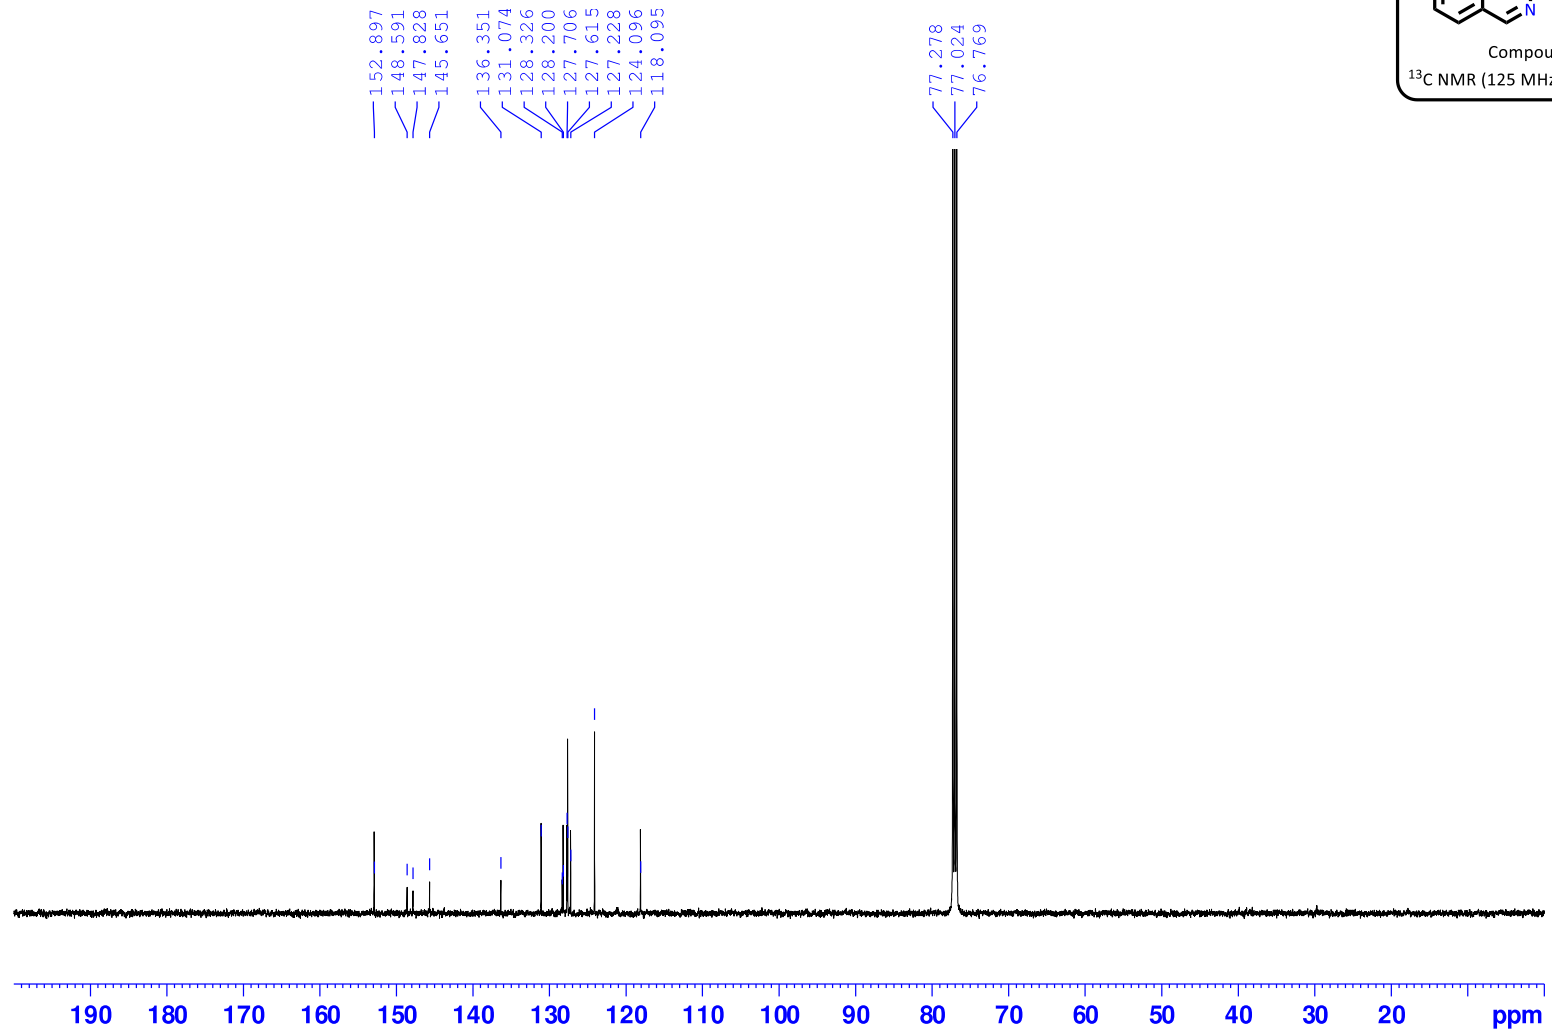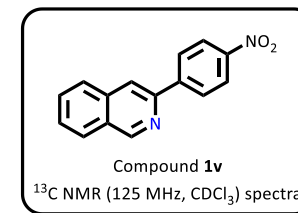

# The <sup>1</sup>H NMR spectrum in CDCl<sub>3</sub> of compound 1w.

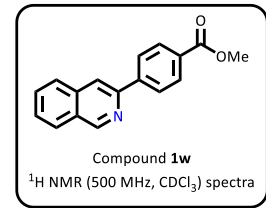

1H CYL-759 sep 3435 0214

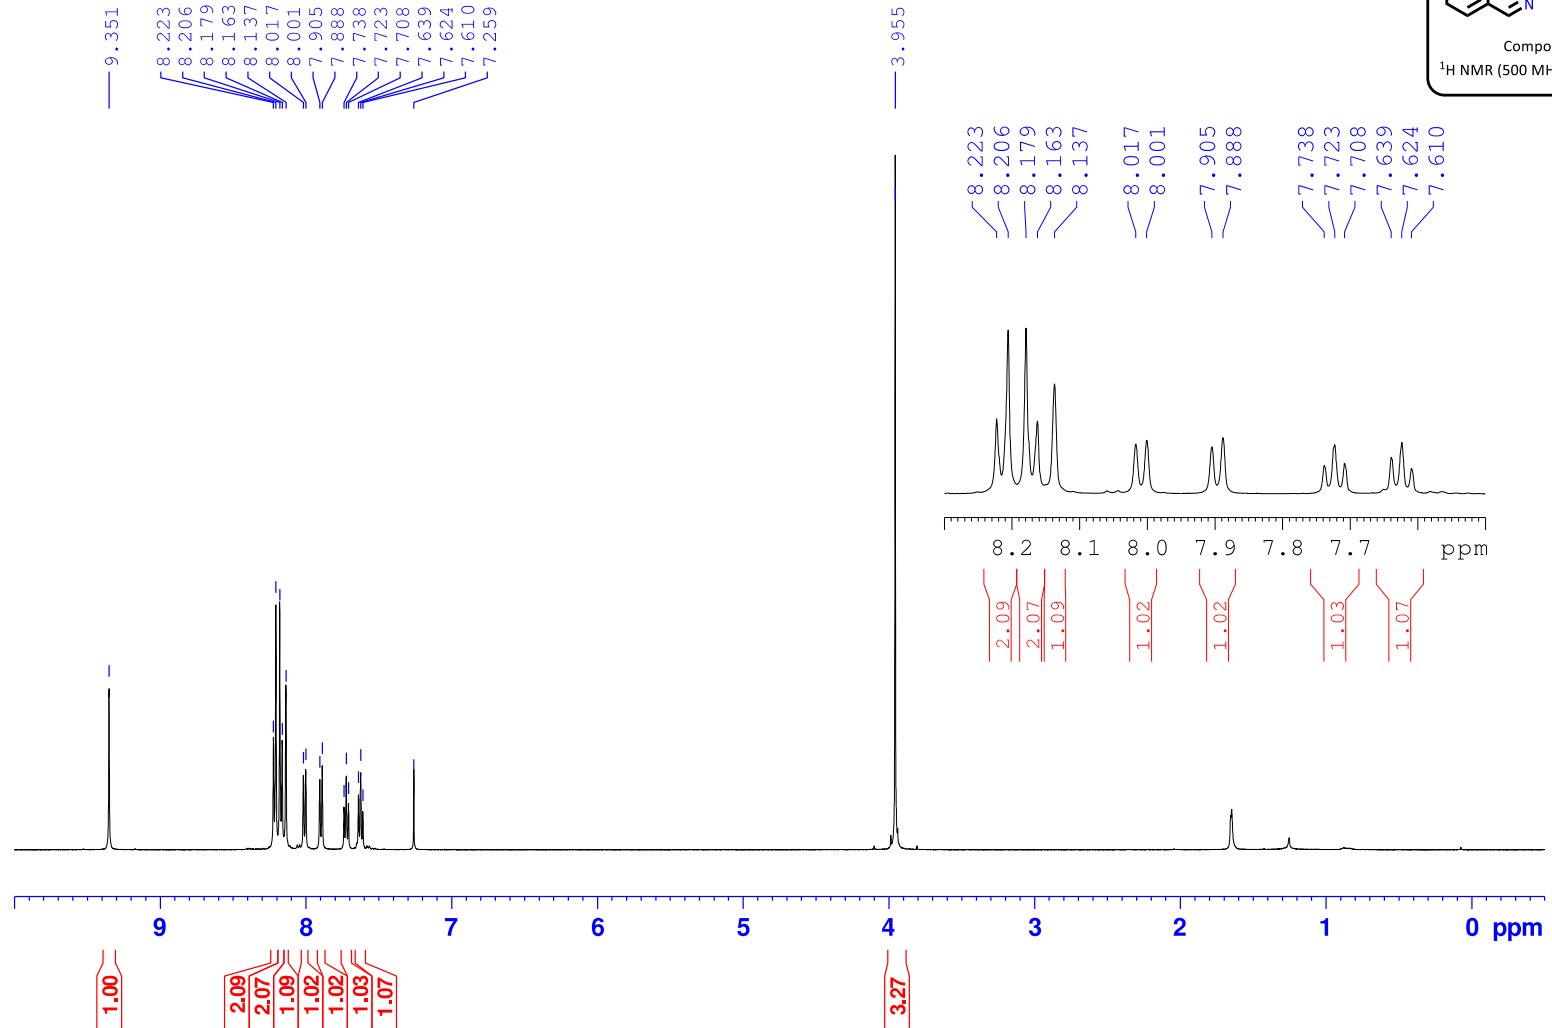

# The $^{13}\text{C}$ NMR spectrum in $\text{CDCl}_3$ of compound 1w.

13C CYL-759 sep 3435 0214

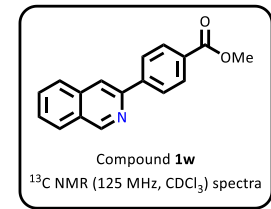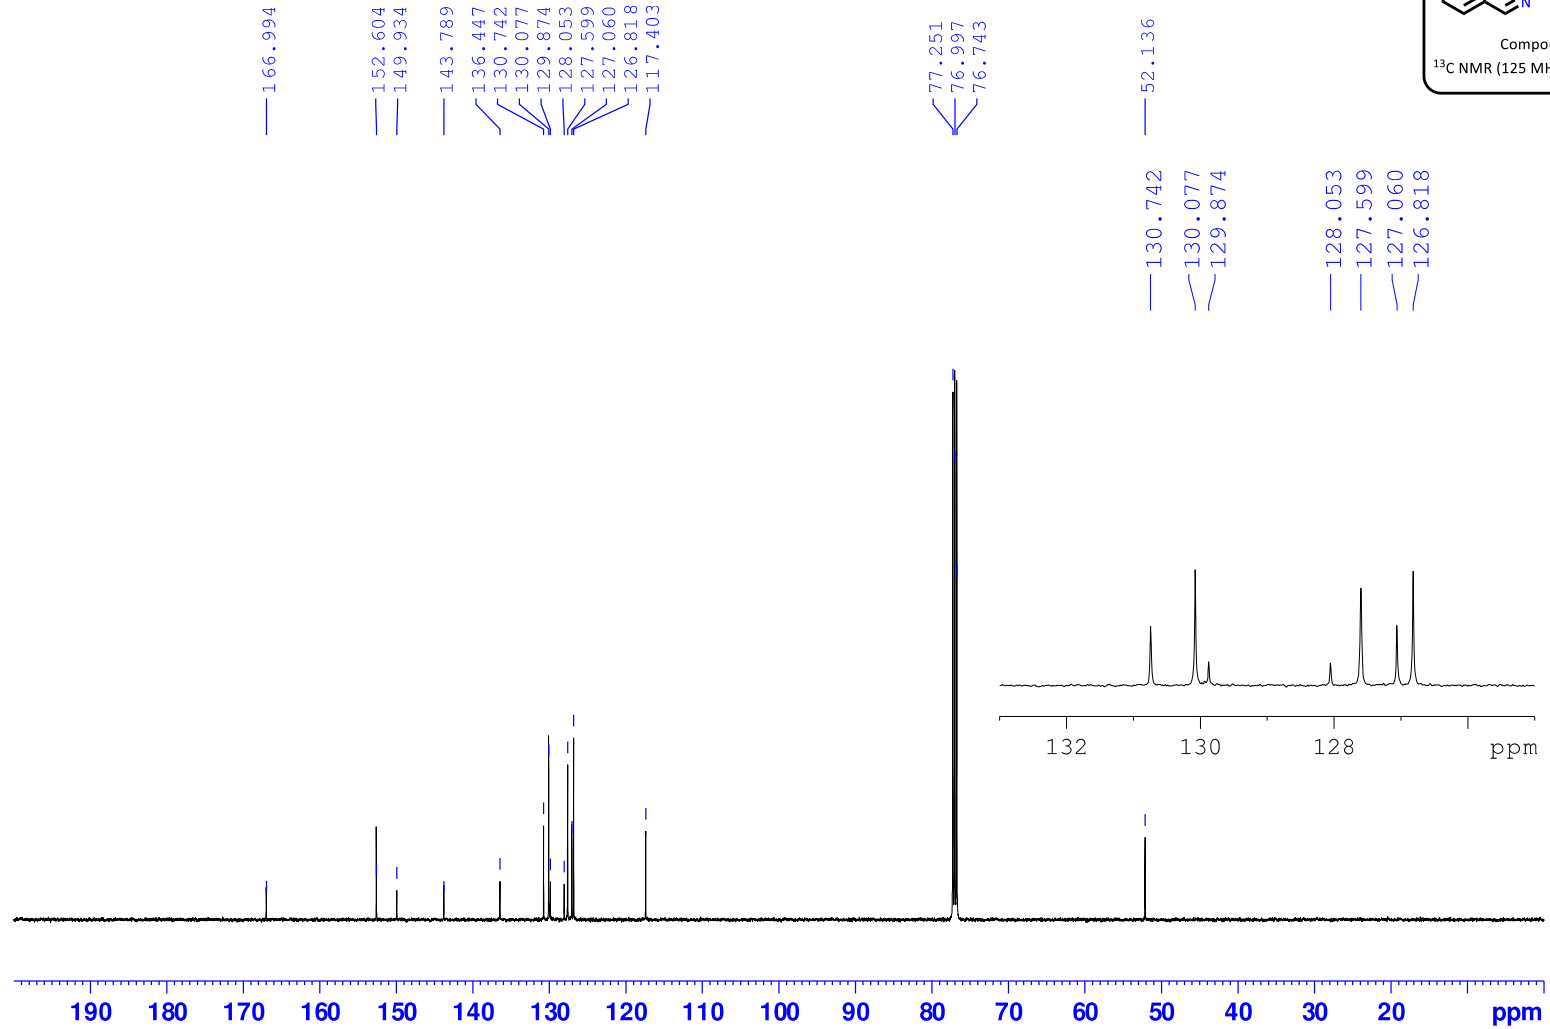



# The $^1\text{H}$ NMR spectrum in $\text{CDCl}_3$ of compound 1x.

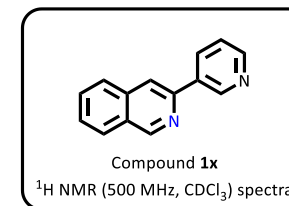

$^1\text{H}$  CYL-757 sep 1415 0211

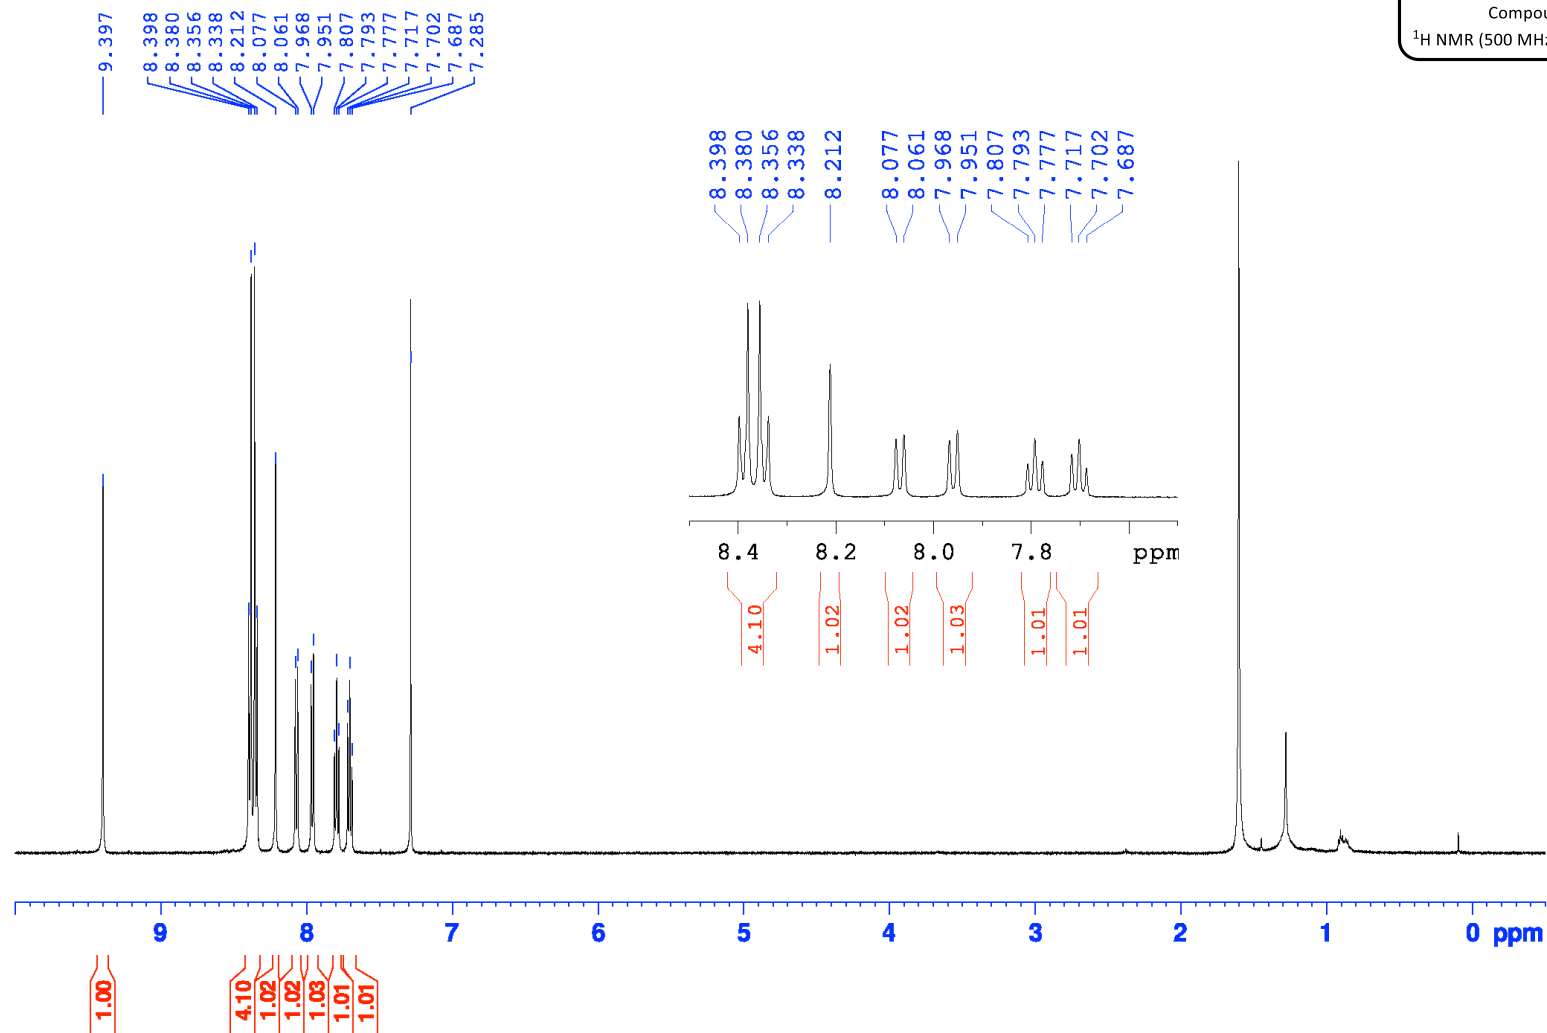

## The high-resolution mass spectrum (FAB+) of compound 2a.

[ Mass Spectrum ]  
Data : 20220421\_CYL-706-HR-002 Date : 21-Apr-2022 17:23  
Sample : CYL-706  
Note : NBA  
Ion Mode : FAB+  
RT : 0.00 min Scan# : 1  
Elements : C 1000/0, H 1000/0, O 1/1  
Mass Tolerance : 50mmu  
Unsaturation (U.S.) : -0.5 - 1000.0

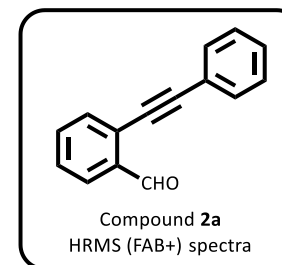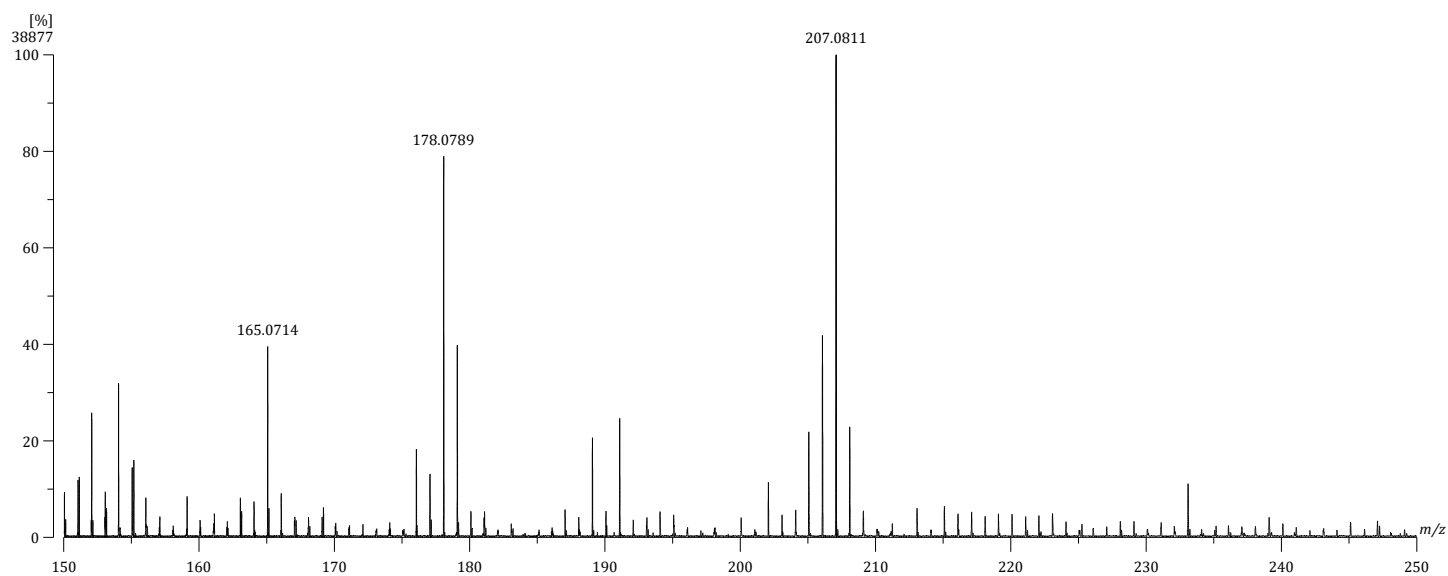

| Observed m/z  | Int%            |      |    |    |   |
|---------------|-----------------|------|----|----|---|
| 207.0811      | 100.00          |      |    |    |   |
| Estimated m/z | Err [ppm / mmu] | U.S. | C  | H  | O |
| 1 207.0810    | +0.5 / +0.1     | 10.5 | 15 | 11 | 1 |

## The high-resolution mass spectrum (FAB+) of compound 2b.

[ Mass Spectrum ]  
Data : 20220421\_CYL-707-HR-002 Date : 21-Apr-2022 17:37  
Sample : CYL-707  
Note : NBA  
Ion Mode : FAB+  
RT : 0.00 min Scan# : 1  
Elements : C 1000/0, H 1000/0, O 1/1  
Mass Tolerance : 50mmu  
Unsaturation (U.S.) : -0.5 - 1000.0

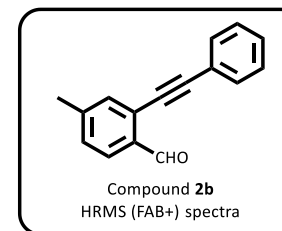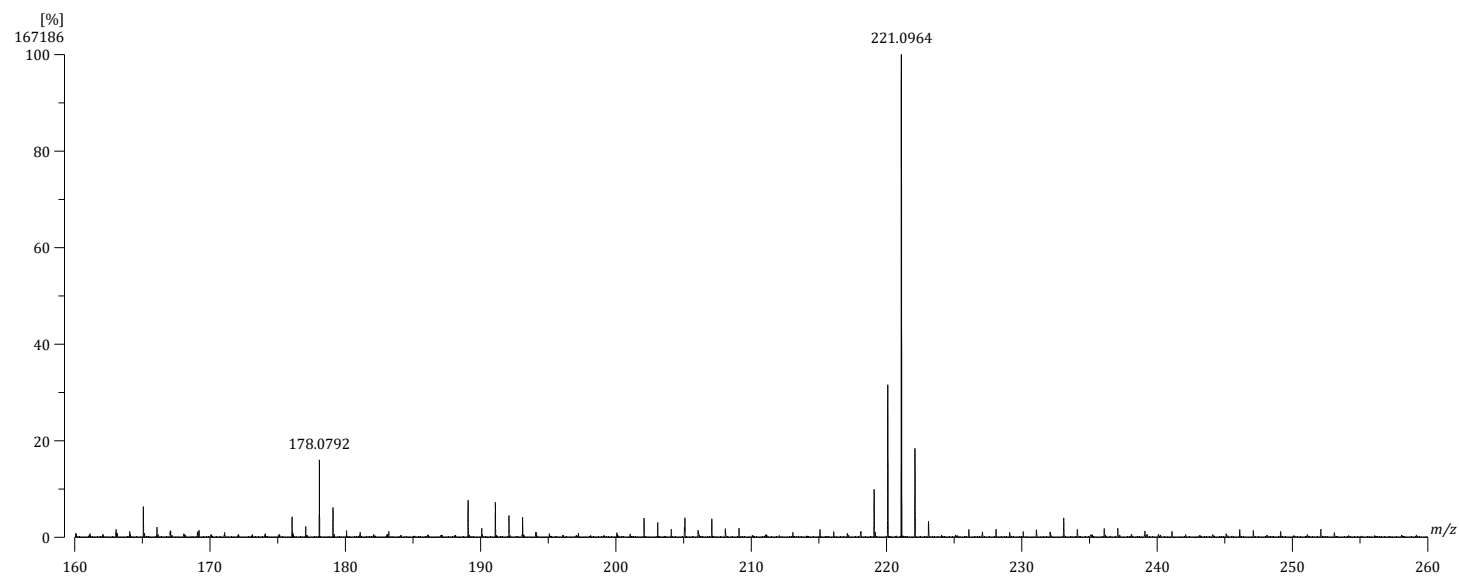

| Observed m/z  | Int%            |      |    |    |   |
|---------------|-----------------|------|----|----|---|
| 221.0964      | 100.00          |      |    |    |   |
| Estimated m/z | Err [ppm / mmu] | U.S. | C  | H  | O |
| 1 221.0966    | -1.1 / -0.2     | 10.5 | 16 | 13 | 1 |

## The high-resolution mass spectrum (FAB+) of compound 2c.

[ Mass Spectrum ]  
Data : 20220421\_CYL-708-HR-002 Date : 21-Apr-2022 17:43  
Sample : CYL-708  
Note : NBA  
Ion Mode : FAB+  
RT : 0.00 min Scan# : 1  
Elements : C 1000/0, H 1000/0, O 1/1  
Mass Tolerance : 50mmu  
Unsaturation (U.S.) : -0.5 - 1000.0

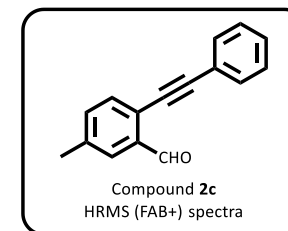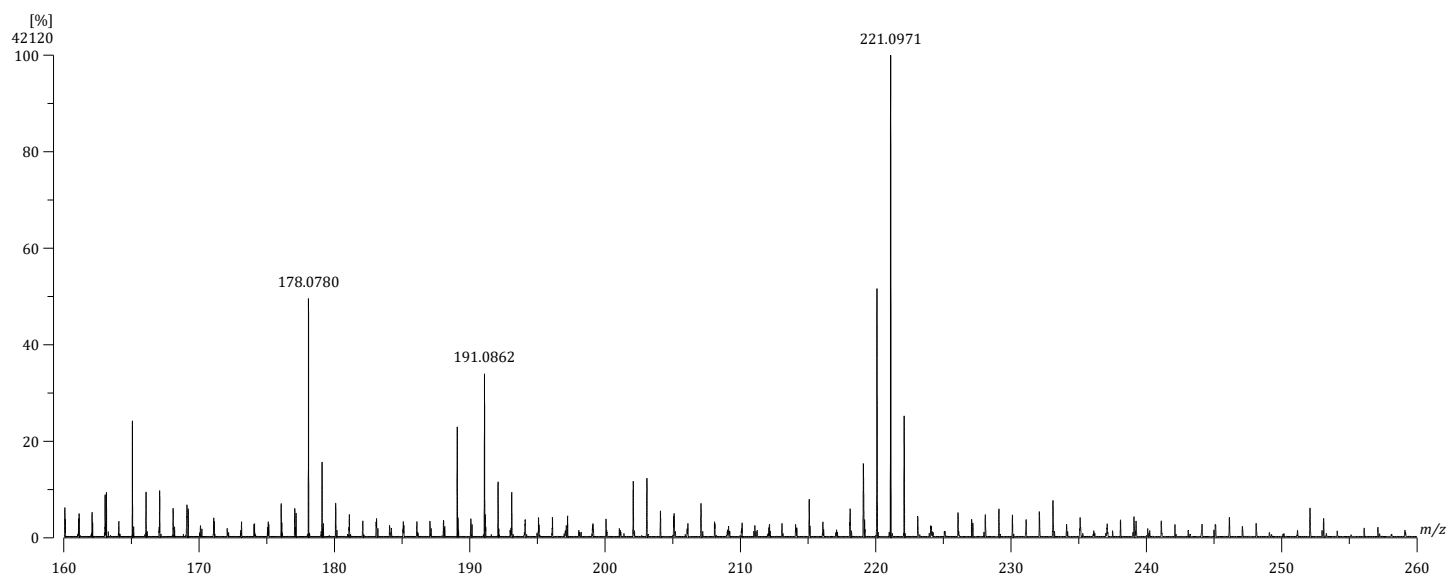

| Observed m/z  | Int%            |      |    |    |   |
|---------------|-----------------|------|----|----|---|
| 221.0971      | 100.00          |      |    |    |   |
| Estimated m/z | Err [ppm / mmu] | U.S. | C  | H  | O |
| 1 221.0966    | +2.1 / +0.5     | 10.5 | 16 | 13 | 1 |

## The high-resolution mass spectrum (FAB+) of compound 2d.

[ Mass Spectrum ]  
Data : 20220421\_CYL-709-HR-003 Date : 21-Apr-2022 17:50  
Sample : CYL-709  
Note : NBA  
Ion Mode : FAB+  
RT : 0.10 min Scan# : 2  
Elements : C 1000/0, H 1000/0, O 2/2  
Mass Tolerance : 50mmu  
Unsaturation (U.S.) : -0.5 - 1000.0

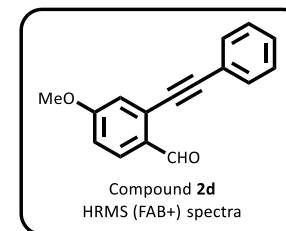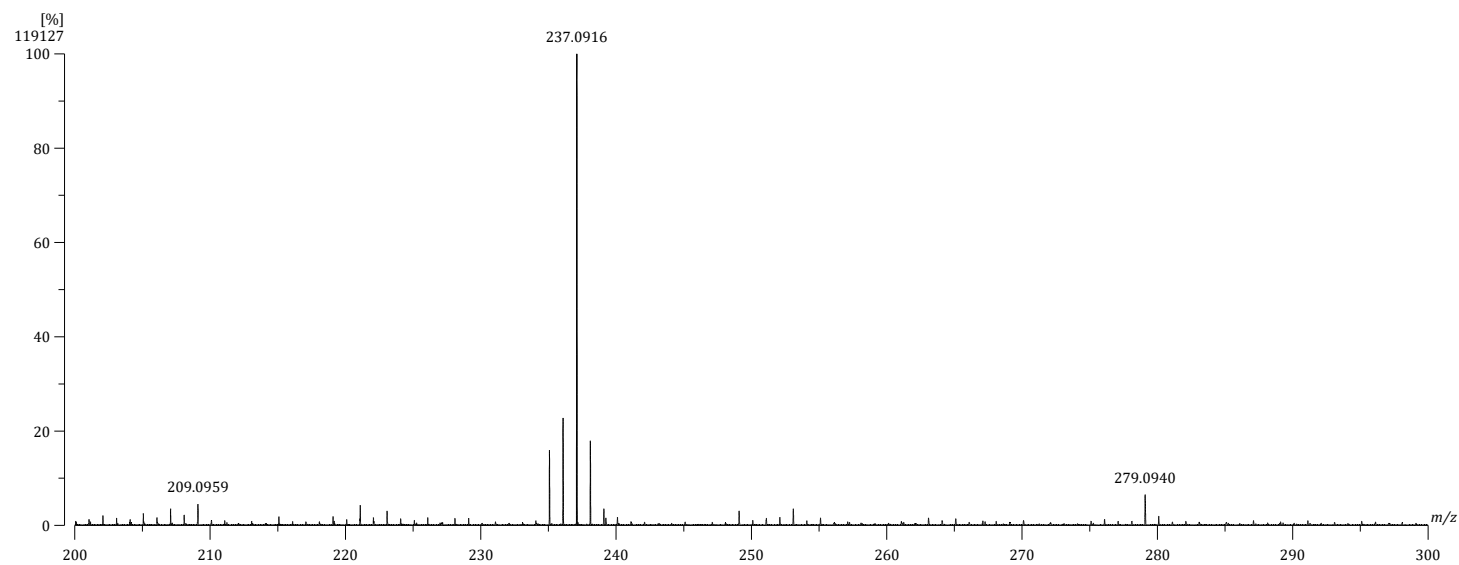

| Observed m/z  | Int%            |      |    |    |   |
|---------------|-----------------|------|----|----|---|
| 237.0916      | 100.00          |      |    |    |   |
| Estimated m/z | Err [ppm / mmu] | U.S. | C  | H  | O |
| 1 237.0916    | +0.2 / +0.0     | 10.5 | 16 | 13 | 2 |

## The high-resolution mass spectrum (FAB+) of compound 2e.

[ Mass Spectrum ]

Data : 20220422\_CYL-710-HR-003 Date : 22-Apr-2022 11:22

Sample : CYL-710

Note : NBA

Ion Mode : FAB+

RT : 0.38 min Scan# : 5

Elements : C 1000/0, H 1000/0, O 2/2

Mass Tolerance : 50mmu

Unsaturation (U.S.) : -0.5 - 1000.0

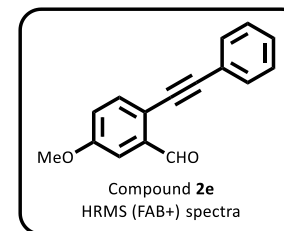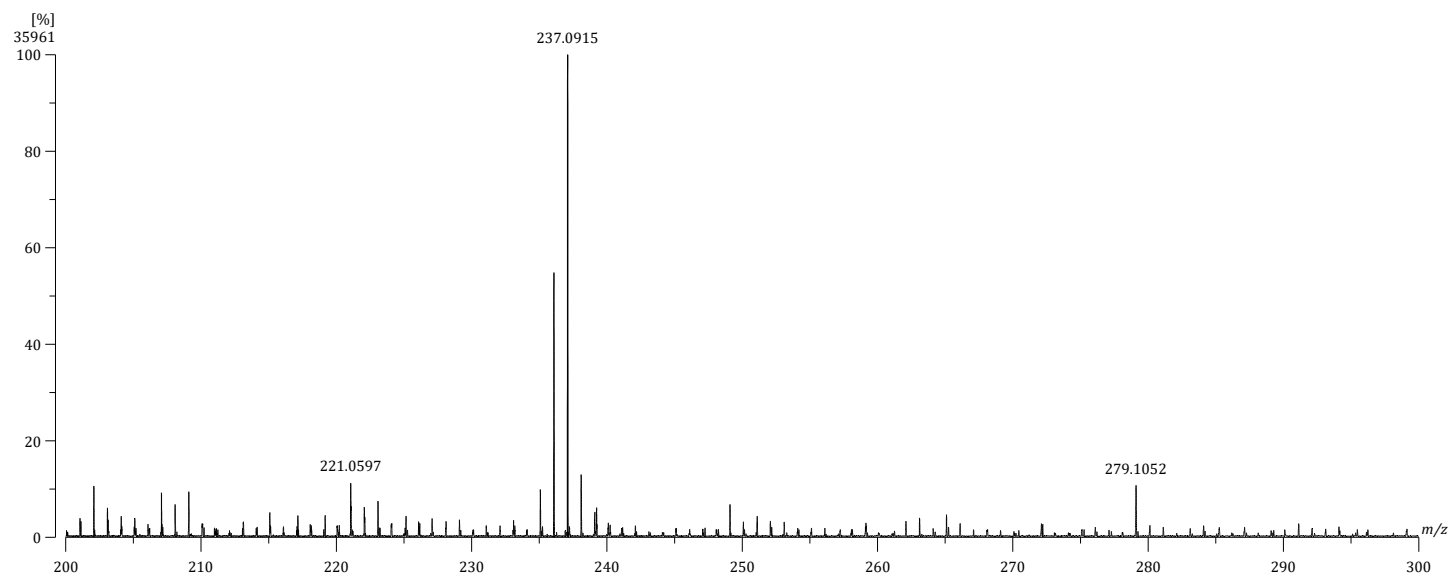

| Observed m/z  | Int%            |      |    |    |   |
|---------------|-----------------|------|----|----|---|
| 237.0915      | 100.00          |      |    |    |   |
| Estimated m/z | Err [ppm / mmu] | U.S. | C  | H  | O |
| 1 237.0916    | -0.2 / -0.1     | 10.5 | 16 | 13 | 2 |

## The high-resolution mass spectrum (FAB+) of compound 2f.

[ Mass Spectrum ]  
Data : 20220422\_CYL-701-2-HR-002 Date : 22-Apr-2022 11:29  
Sample : CYL-701-2  
Note : NBA  
Ion Mode : FAB+  
RT : 0.00 min Scan# : 1  
Elements : C 1000/0, H 1000/0, O 3/3  
Mass Tolerance : 50mmu  
Unsaturation (U.S.) : -0.5 - 1000.0

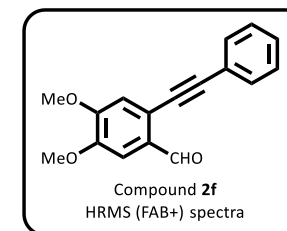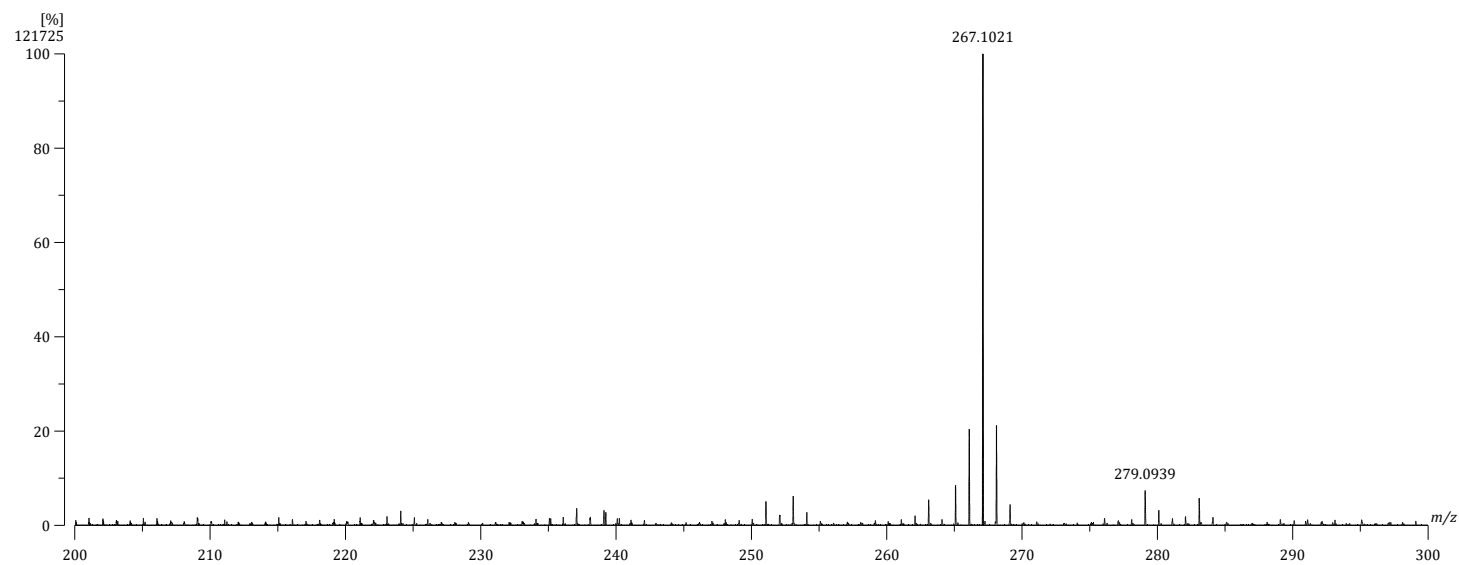

| Observed m/z  | Int%           |      |    |    |   |
|---------------|----------------|------|----|----|---|
| 267.1021      | 100.00         |      |    |    |   |
| Estimated m/z | Err[ppm / mmu] | U.S. | C  | H  | O |
| 1 267.1021    | -0.1 / -0.0    | 10.5 | 17 | 15 | 3 |

## The high-resolution mass spectrum (ESI+) of compound 2g.

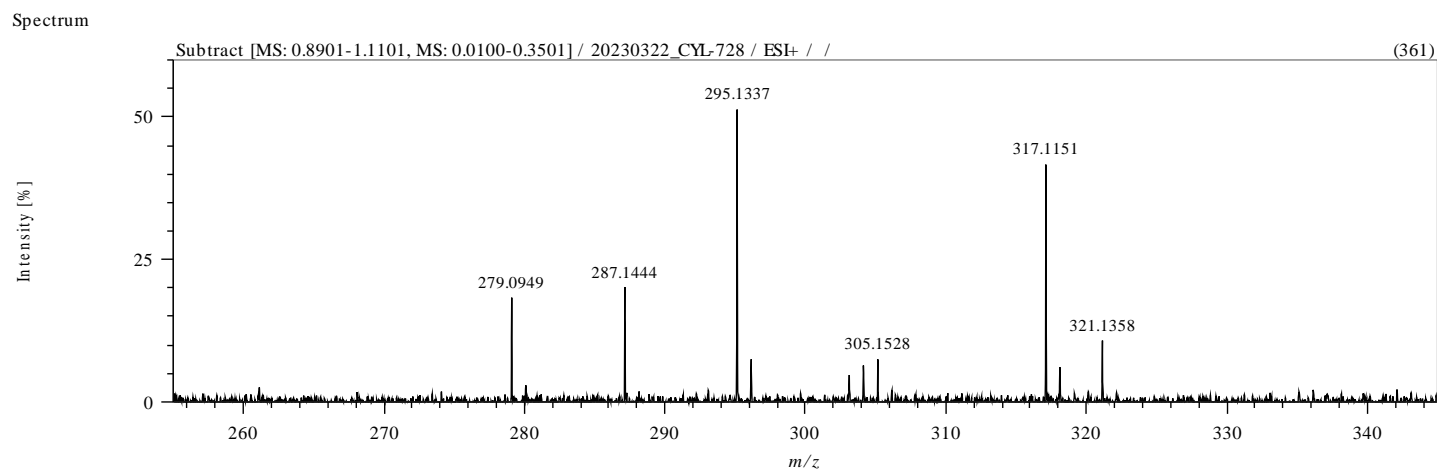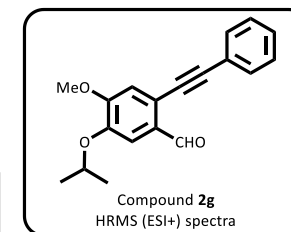

### Elemental Composition

| Parameters |               | Elements Set 1: |     |     |   |    |
|------------|---------------|-----------------|-----|-----|---|----|
| Tolerance: | ± 5.00 ppm    | Symbol          | C   | H   | O | Na |
| Electron:  | Odd/Even      | Min             | 0   | 0   | 3 | 0  |
| Charge:    | +1            | Max             | 100 | 400 | 3 | 1  |
| DBE:       | -99.0 - 999.0 |                 |     |     |   |    |

### Results

| Mass      | Formula                                           | Calculated Mass | Mass Difference [mDa] | Mass Difference [ppm] | DBE  |
|-----------|---------------------------------------------------|-----------------|-----------------------|-----------------------|------|
| 295.13369 | C <sub>19</sub> H <sub>19</sub> O <sub>3</sub>    | 295.13287       | 0.82                  | 2.77                  | 10.5 |
| 317.11506 | C <sub>19</sub> H <sub>18</sub> O <sub>3</sub> Na | 317.11482       | 0.24                  | 0.77                  | 10.5 |



## The high-resolution mass spectrum (FAB+) of compound 2h.

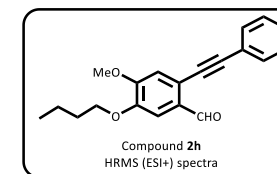

[ Mass Spectrum ]  
Data : 20220421\_CYL-729-HR-002 Date : 21-Apr-2022 16:57  
Sample : CYL-729  
Note : NBA  
Ion Mode : FAB+  
RT : 0.00 min Scan# : 1  
Elements : C 1000/0, H 1000/0, O 3/3  
Mass Tolerance : 50mmu  
Unsaturation (U.S.) : -0.5 - 1000.0

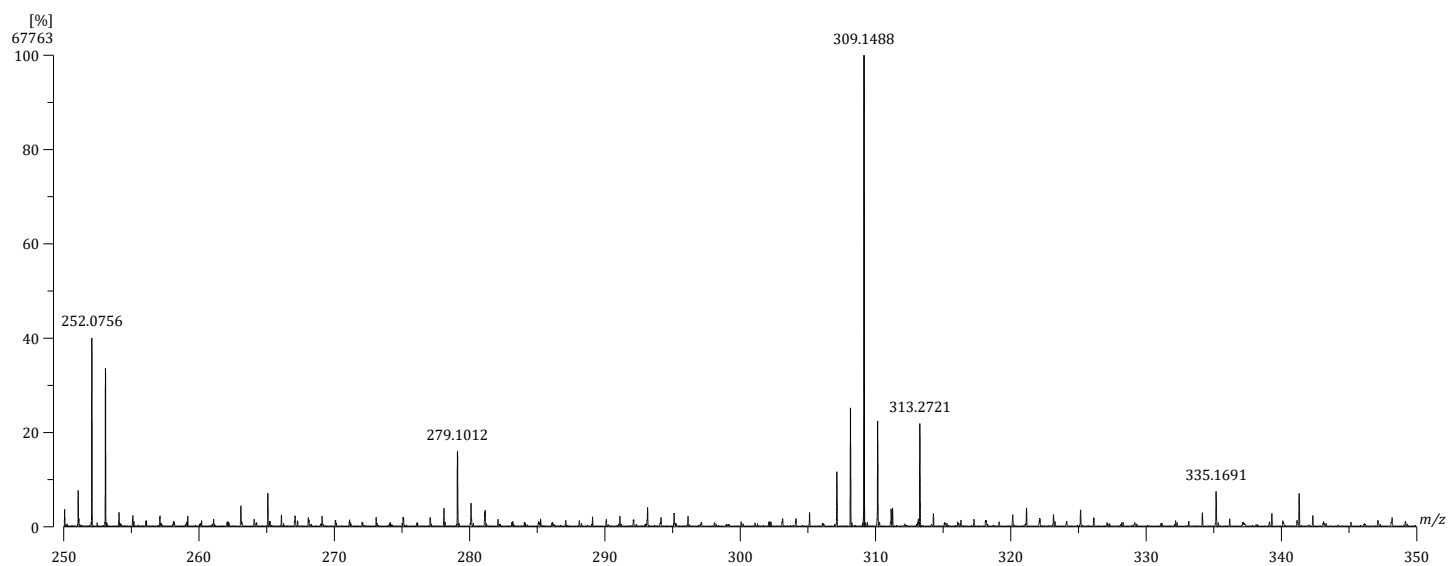

| Observed m/z  | Int%            |      |    |    |   |
|---------------|-----------------|------|----|----|---|
| 309.1488      | 100.00          |      |    |    |   |
| Estimated m/z | Err [ppm / mmu] | U.S. | C  | H  | O |
| 1 309.1491    | -0.9 / -0.3     | 10.5 | 20 | 21 | 3 |

## The high-resolution mass spectrum (FAB+) of compound 2i.

[ Mass Spectrum ]

Data : 20220422\_CYL-711-HR-003 Date : 22-Apr-2022 12:30

Sample : CYL-711

Note : NBA

Ion Mode : FAB+

RT : 0.00 min Scan# : 1

Elements : C 1000/0, H 1000/0, F 1/1, O 1/1

Mass Tolerance : 50mmu

Unsaturation (U.S.) : -0.5 - 1000.0

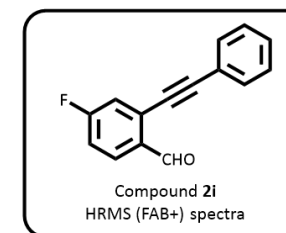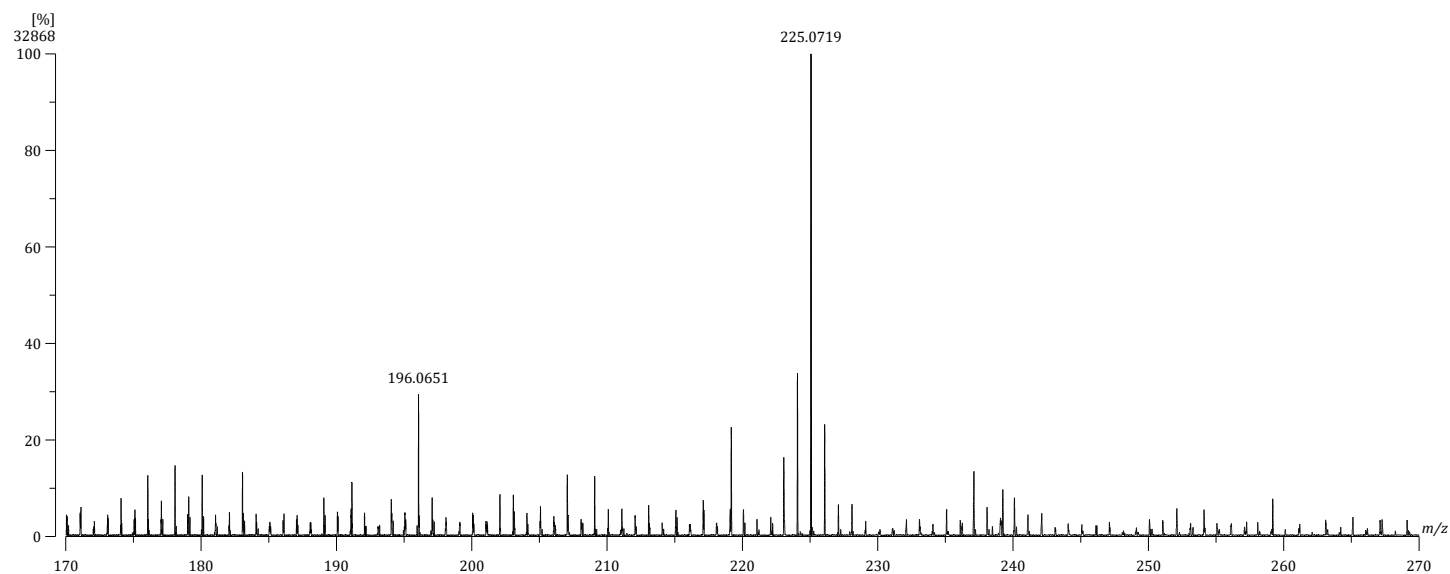

| Observed m/z  | Int%            |      |    |    |   |   |
|---------------|-----------------|------|----|----|---|---|
| 225.0719      | 100.00          |      |    |    |   |   |
| Estimated m/z | Err [ppm / mmu] | U.S. | C  | H  | F | O |
| 1 225.0716    | +1.5 / +0.3     | 10.5 | 15 | 10 | 1 | 1 |

## The high-resolution mass spectrum (FAB+) of compound 2j.

[ Mass Spectrum ]

Data : 20220422\_CYL-712-HR-003 Date : 22-Apr-2022 12:22

Sample : CYL-712

Note : NBA

Ion Mode : FAB+

RT : 0.00 min Scan# : 1

Elements : C 1000/0, H 1000/0, F 1/1, O 1/1

Mass Tolerance : 50mmu

Unsaturation (U.S.) : -0.5 - 1000.0

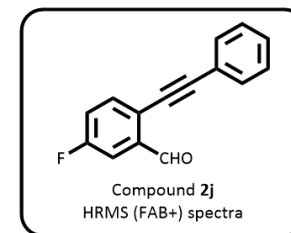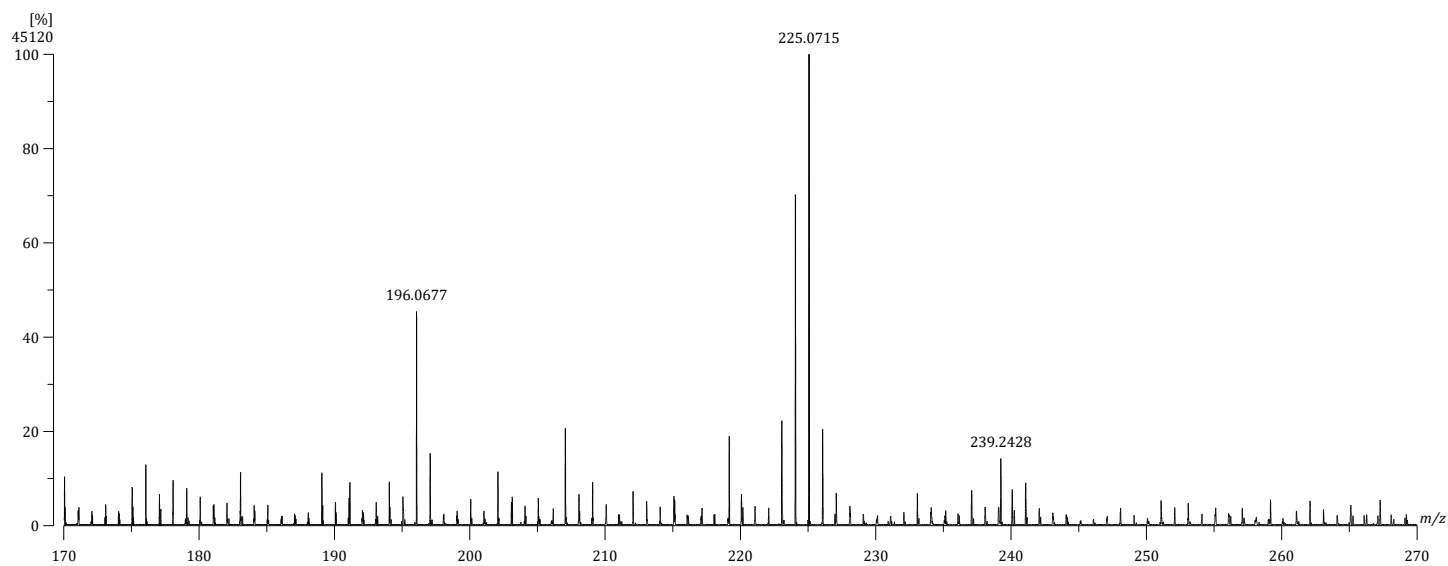

| Observed m/z  | Int%            |      |    |    |   |   |
|---------------|-----------------|------|----|----|---|---|
| 225.0715      | 100.00          |      |    |    |   |   |
| Estimated m/z | Err [ppm / mmu] | U.S. | C  | H  | F | O |
| 1 225.0716    | -0.3 / -0.1     | 10.5 | 15 | 10 | 1 | 1 |

## The high-resolution mass spectrum (FAB+) of compound 2k.

[ Mass Spectrum ]  
Data : 20220422\_CYL-716-HR-002 Date : 22-Apr-2022 11:57  
Sample : CYL-716  
Note : NBA  
Ion Mode : FAB+  
RT : 0.21 min Scan# : 3  
Elements : C 1000/0, H 1000/0, O 1/1  
Mass Tolerance : 50mmu  
Unsaturation (U.S.) : -0.5 - 1000.0

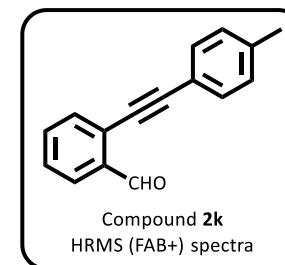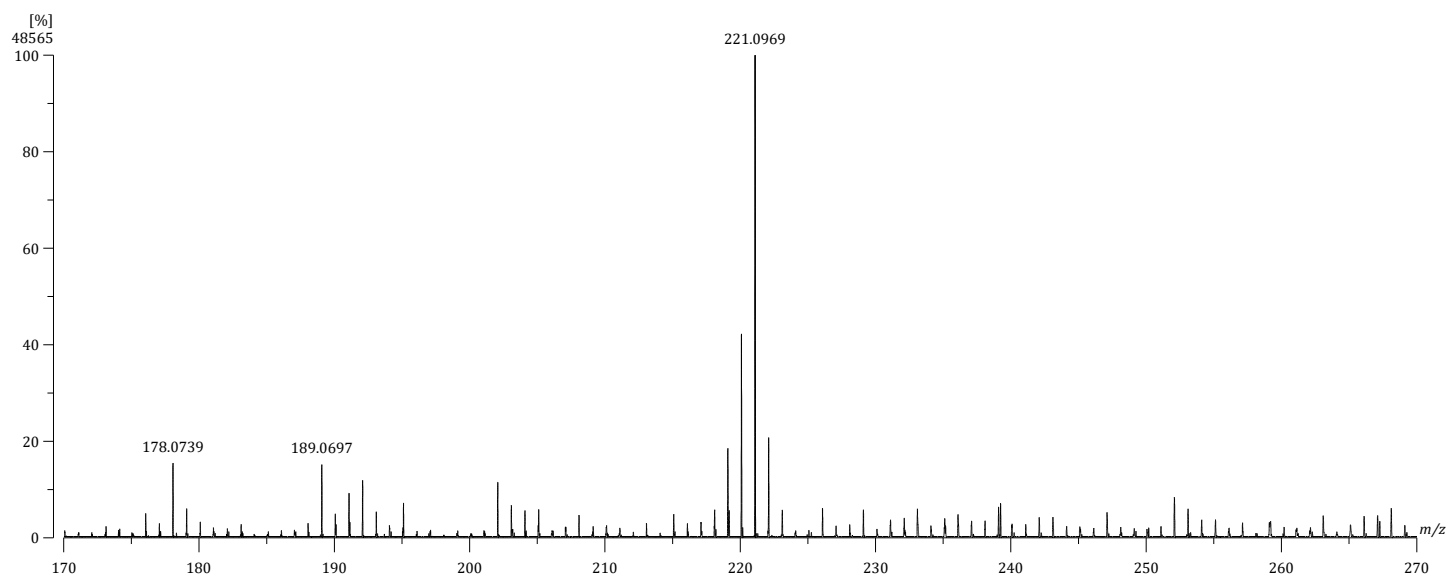

| Observed m/z  | Int%            |      |    |    |   |
|---------------|-----------------|------|----|----|---|
| 221.0969      | 100.00          |      |    |    |   |
| Estimated m/z | Err [ppm / mmu] | U.S. | C  | H  | O |
| 1 221.0966    | +1.2 / +0.3     | 10.5 | 16 | 13 | 1 |

## The high-resolution mass spectrum (FAB+) of compound 2l.

[ Mass Spectrum ]  
Data : 20220422\_CYL-717-HR-003 Date : 22-Apr-2022 11:47  
Sample : CYL-717  
Note : NBA  
Ion Mode : FAB+  
RT : 0.11 min Scan# : 2  
Elements : C 1000/0, H 1000/0, O 1/1  
Mass Tolerance : 50mmu  
Unsaturation (U.S.) : -0.5 - 1000.0

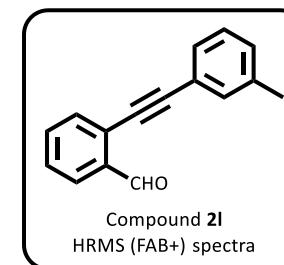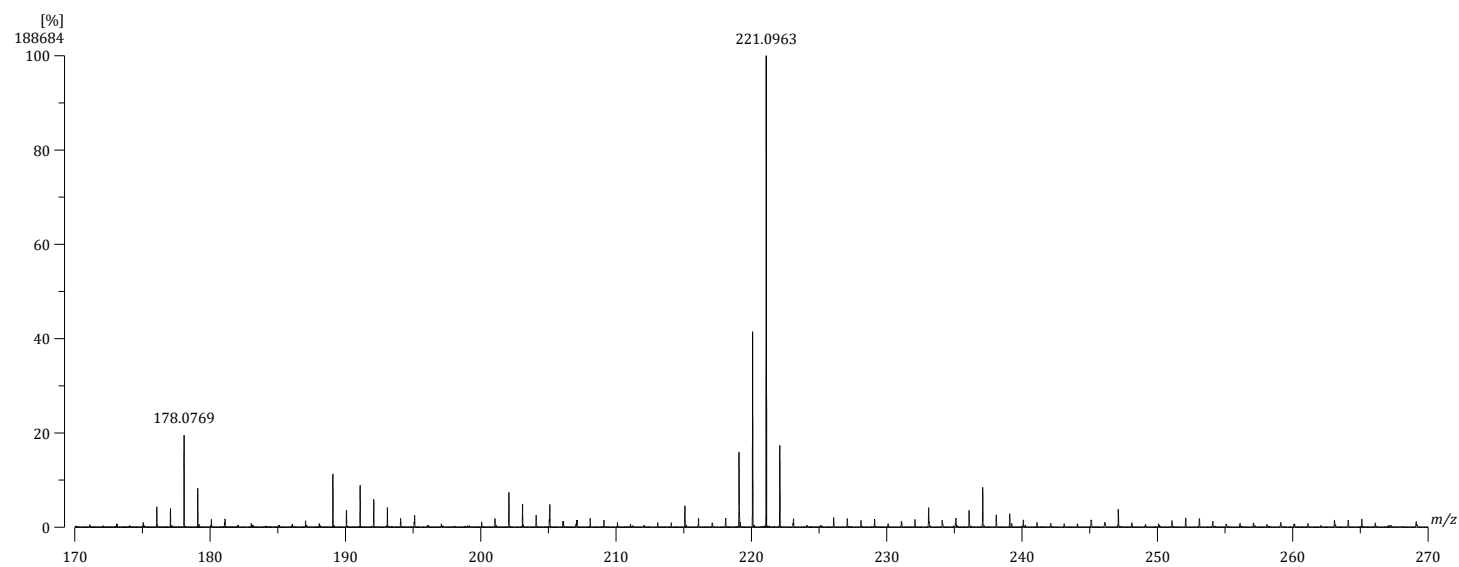

| Observed m/z  | Int%                 |    |    |   |
|---------------|----------------------|----|----|---|
| 221.0963      | 100.00               |    |    |   |
| Estimated m/z | Err [ppm / mmu] U.S. | C  | H  | O |
| 1 221.0966    | -1.5 / -0.3 10.5     | 16 | 13 | 1 |

## The high-resolution mass spectrum (FAB+) of compound 2m.

[ Mass Spectrum ]  
Data : 20220422\_CYL-726-HR-002 Date : 22-Apr-2022 11:36  
Sample : CYL-726  
Note : NBA  
Ion Mode : FAB+  
RT : 0.29 min Scan# : 4  
Elements : C 1000/0, H 1000/0, O 1/1  
Mass Tolerance : 50mmu  
Unsaturation (U.S.) : -0.5 - 1000.0

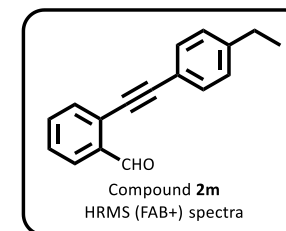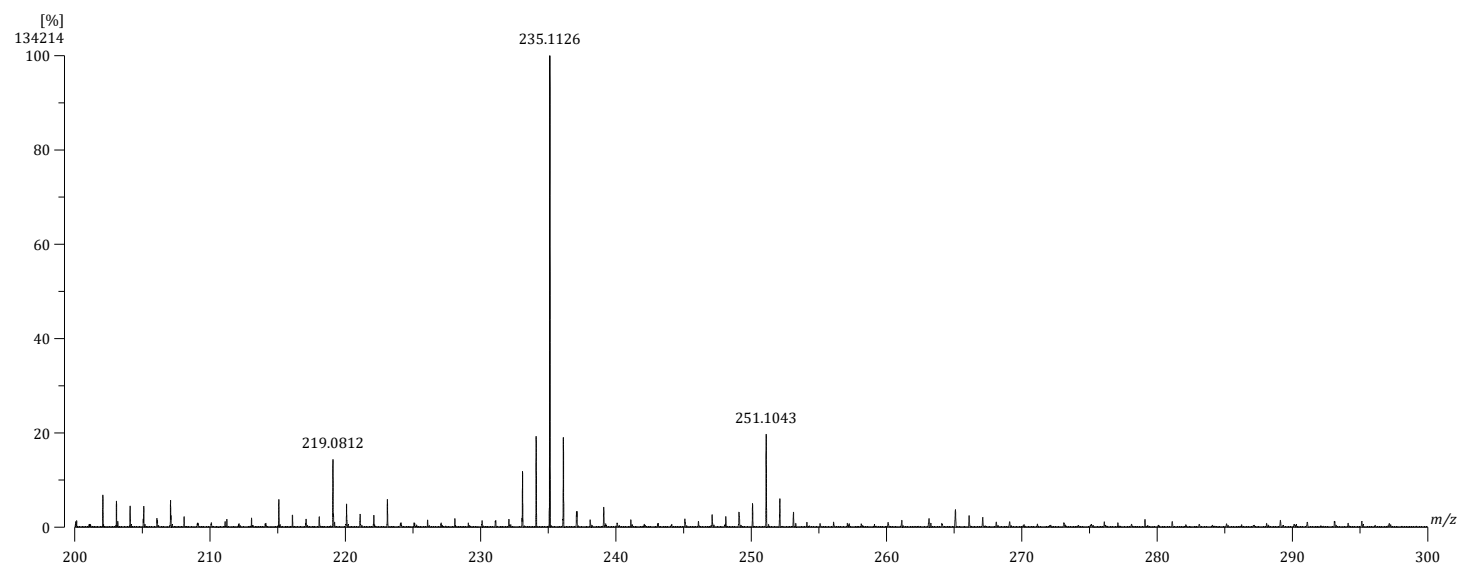

| Observed m/z | Int%   | Estimated m/z | Err [ppm / mmu] | U.S. | C  | H  | O |
|--------------|--------|---------------|-----------------|------|----|----|---|
| 235.1126     | 100.00 |               |                 |      |    |    |   |
| 1 235.1123   |        |               | +1.3 / +0.3     | 10.5 | 17 | 15 | 1 |

## The high-resolution mass spectrum (FAB+) of compound 2n.

[ Mass Spectrum ]

Data : 20220421\_CYL-722-HR-002 Date : 21-Apr-2022 17:16

Sample : CYL-722

Note : NBA

Ion Mode : FAB+

RT : 0.38 min Scan# : 5

Elements : C 1000/0, H 1000/0, O 1/1

Mass Tolerance : 50mmu

Unsaturation (U.S.) : -0.5 - 1000.0

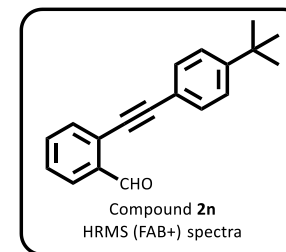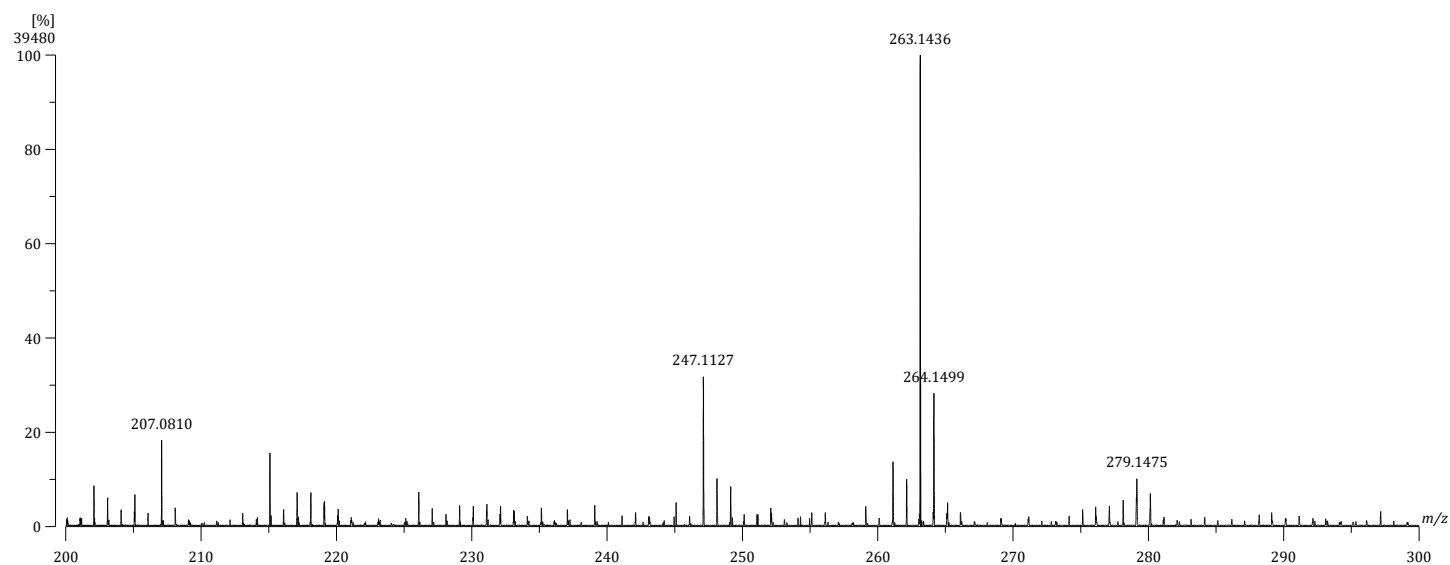

| Observed m/z  | Int%            |      |    |    |   |
|---------------|-----------------|------|----|----|---|
| 263.1436      | 100.00          |      |    |    |   |
| Estimated m/z | Err [ppm / mmu] | U.S. | C  | H  | O |
| 1 263.1436    | +0.0 / +0.0     | 10.5 | 19 | 19 | 1 |

## The high-resolution mass spectrum (FAB+) of compound 2o.

[ Mass Spectrum ]  
Data : 20220421\_CYL-713-HR-002 Date : 21-Apr-2022 17:10  
Sample : CYL-713  
Note : NBA  
Ion Mode : FAB+  
RT : 0.48 min Scan# : 6  
Elements : C 1000/0, H 1000/0, O 2/2  
Mass Tolerance : 50mmu  
Unsaturation (U.S.) : -0.5 - 1000.0

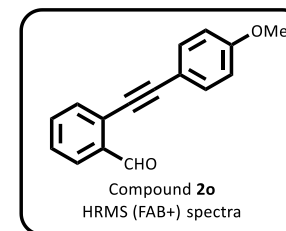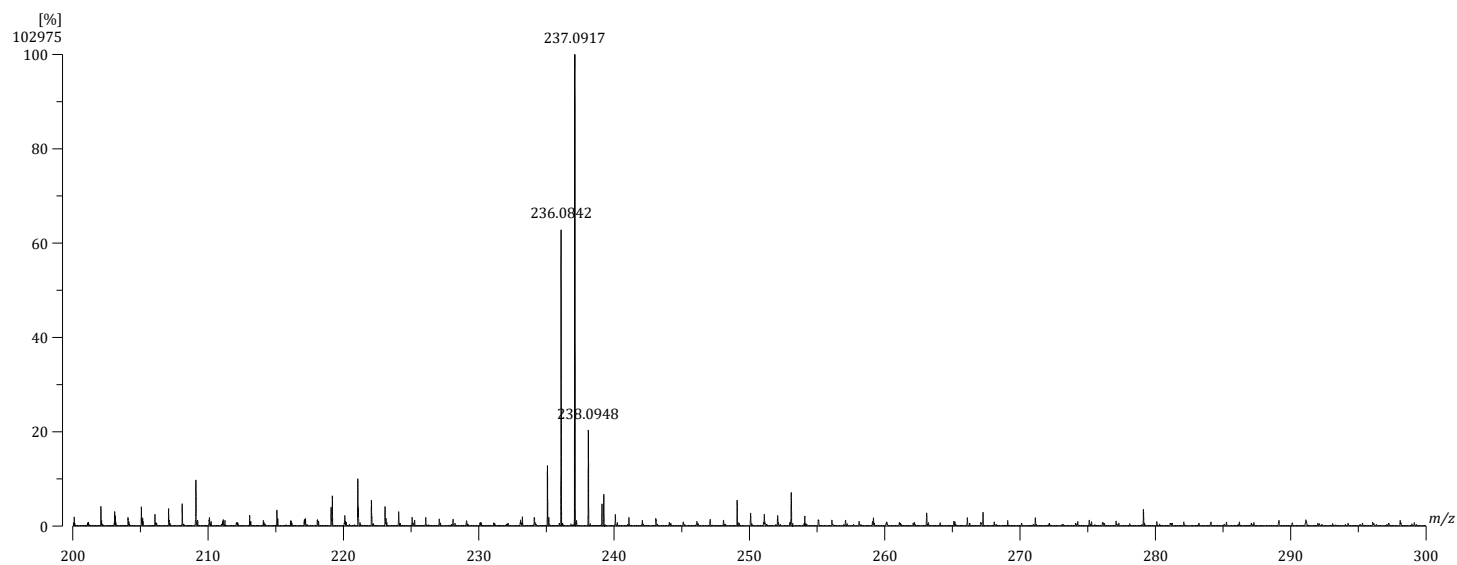

| Observed m/z  | Int%            |      |    |    |   |
|---------------|-----------------|------|----|----|---|
| 237.0917      | 100.00          |      |    |    |   |
| Estimated m/z | Err [ppm / mmu] | U.S. | C  | H  | O |
| 1 237.0916    | +0.6 / +0.1     | 10.5 | 16 | 13 | 2 |



## The high-resolution mass spectrum (FAB+) of compound 2p.

[ Mass Spectrum ]  
Data : 20220421\_CYL-714-HR-002 Date : 21-Apr-2022 17:03  
Sample : CYL-714  
Note : NBA  
Ion Mode : FAB+  
RT : 0.00 min Scan# : 1  
Elements : C 1000/0, H 1000/0, O 2/2  
Mass Tolerance : 50mmu  
Unsaturation (U.S.) : -0.5 - 1000.0

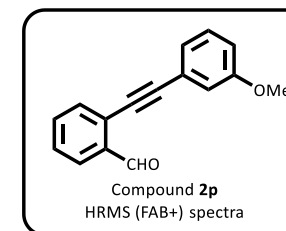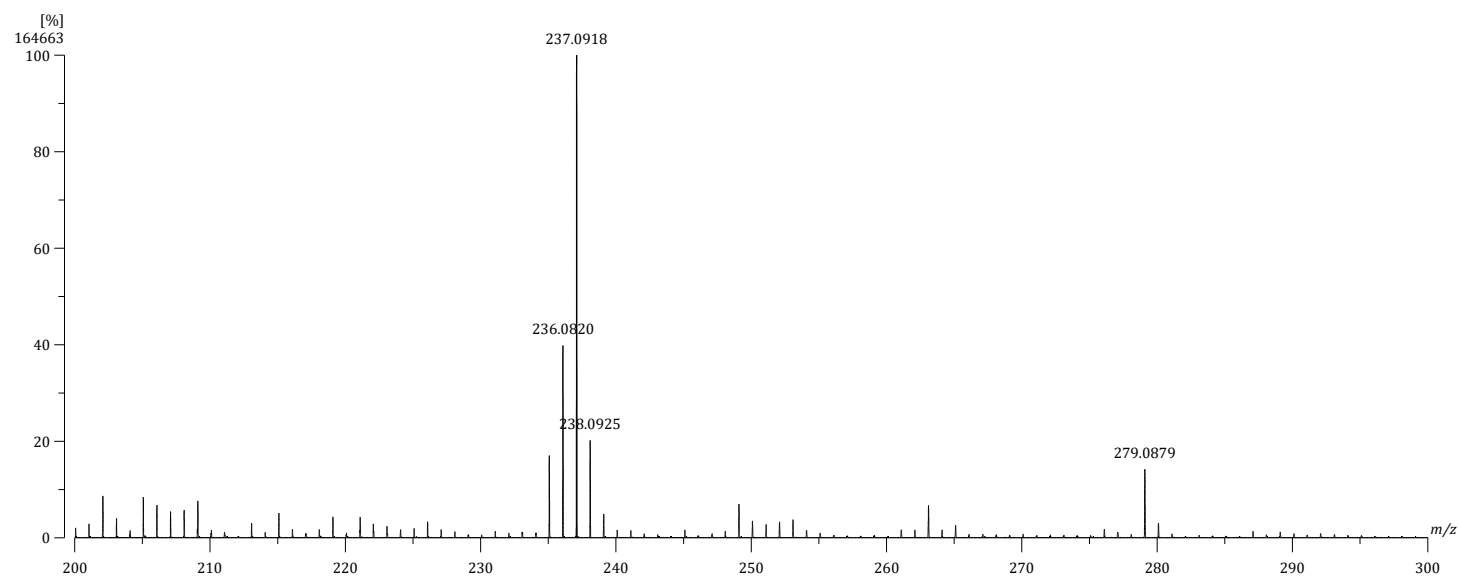

| Observed m/z  | Int%                 |    |    |   |
|---------------|----------------------|----|----|---|
| 237.0918      | 100.00               |    |    |   |
| Estimated m/z | Err [ppm / mmu] U.S. | C  | H  | O |
| 1 237.0916    | +1.0 / +0.2 10.5     | 16 | 13 | 2 |

## The high-resolution mass spectrum (FAB+) of compound 2q.

[ Mass Spectrum ]  
Data : 20220421\_CYL-715-HR-002 Date : 21-Apr-2022 16:50  
Sample : CYL-715  
Note : NBA  
Ion Mode : FAB+  
RT : 0.10 min Scan# : 2  
Elements : C 1000/0, H 1000/0, O 2/2  
Mass Tolerance : 50mmu  
Unsaturation (U.S.) : -0.5 - 1000.0

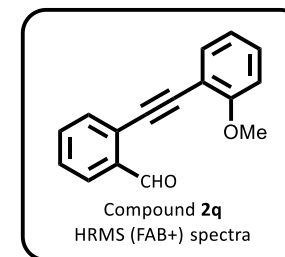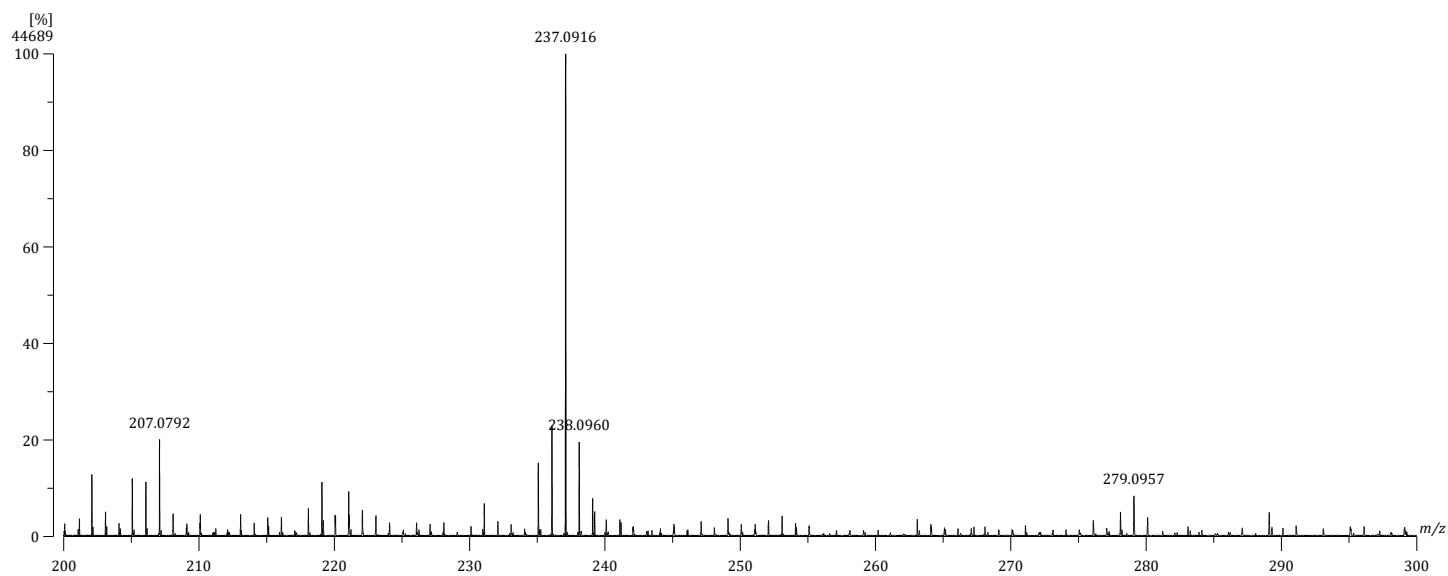

| Observed m/z  | Int%            |      |    |    |   |
|---------------|-----------------|------|----|----|---|
| 237.0916      | 100.00          |      |    |    |   |
| Estimated m/z | Err [ppm / mmu] | U.S. | C  | H  | O |
| 1 237.0916    | +0.2 / +0.0     | 10.5 | 16 | 13 | 2 |

## The high-resolution mass spectrum (FAB+) of compound 2r.

[ Mass Spectrum ]

Data : 20220420\_CYL-718-HR-002 Date : 20-Apr-2022 16:55

Sample : CYL-718

Note : NBA

Ion Mode : FAB+

RT : 0.00 min Scan# : (1,6)

Elements : C 1000/0, H 1000/0, F 1/1, O 1/1

Mass Tolerance : 50mmu

Unsaturation (U.S.) : -0.5 - 1000.0

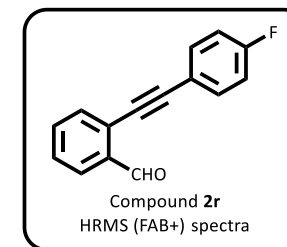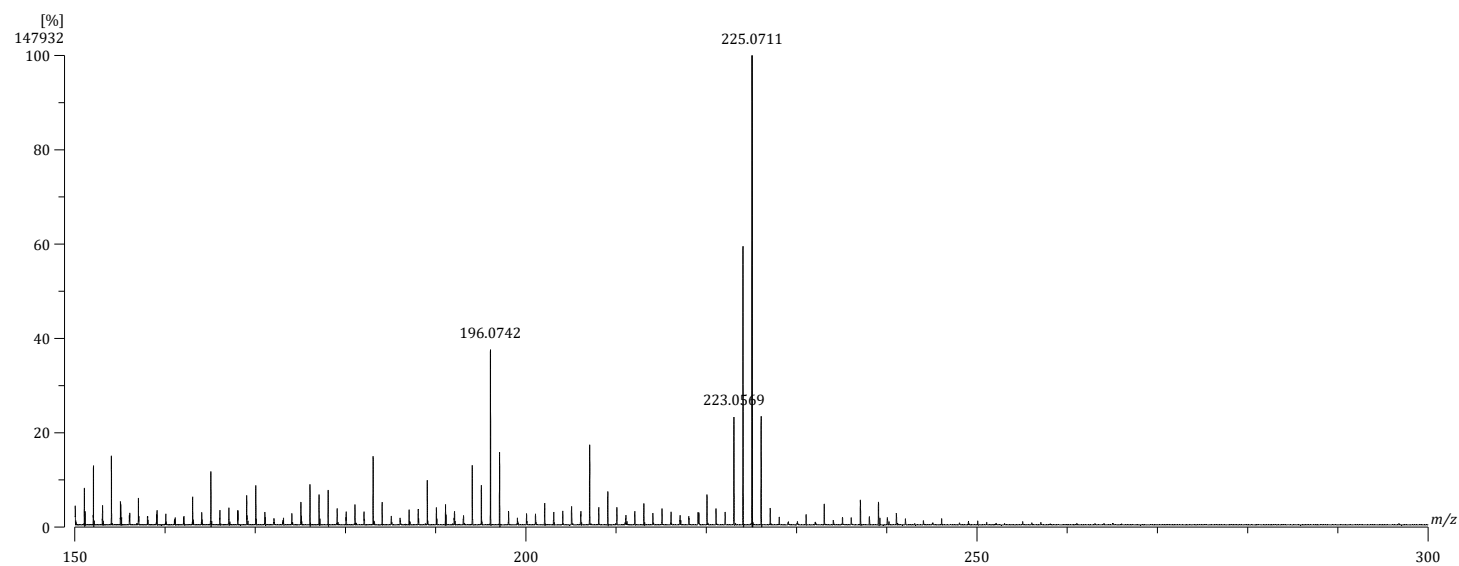

| Observed m/z  | Int%            |      |    |    |   |   |
|---------------|-----------------|------|----|----|---|---|
| 225.0711      | 100.00          |      |    |    |   |   |
| Estimated m/z | Err [ppm / mmu] | U.S. | C  | H  | F | O |
| 1 225.0716    | -2.1 / -0.5     | 10.5 | 15 | 10 | 1 | 1 |

## The high-resolution mass spectrum (FAB+) of compound 2s.

[ Mass Spectrum ]

Data : 20220421\_CYL-719-HR-002 Date : 21-Apr-2022 16:21

Sample : CYL-719

Note : NBA

Ion Mode : FAB+

RT : 0.00 min Scan# : (1,6)

Elements : C 1000/0, H 1000/0, F 1/1, O 1/1

Mass Tolerance : 50mmu

Unsaturation (U.S.) : -0.5 - 1000.0

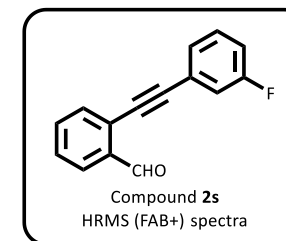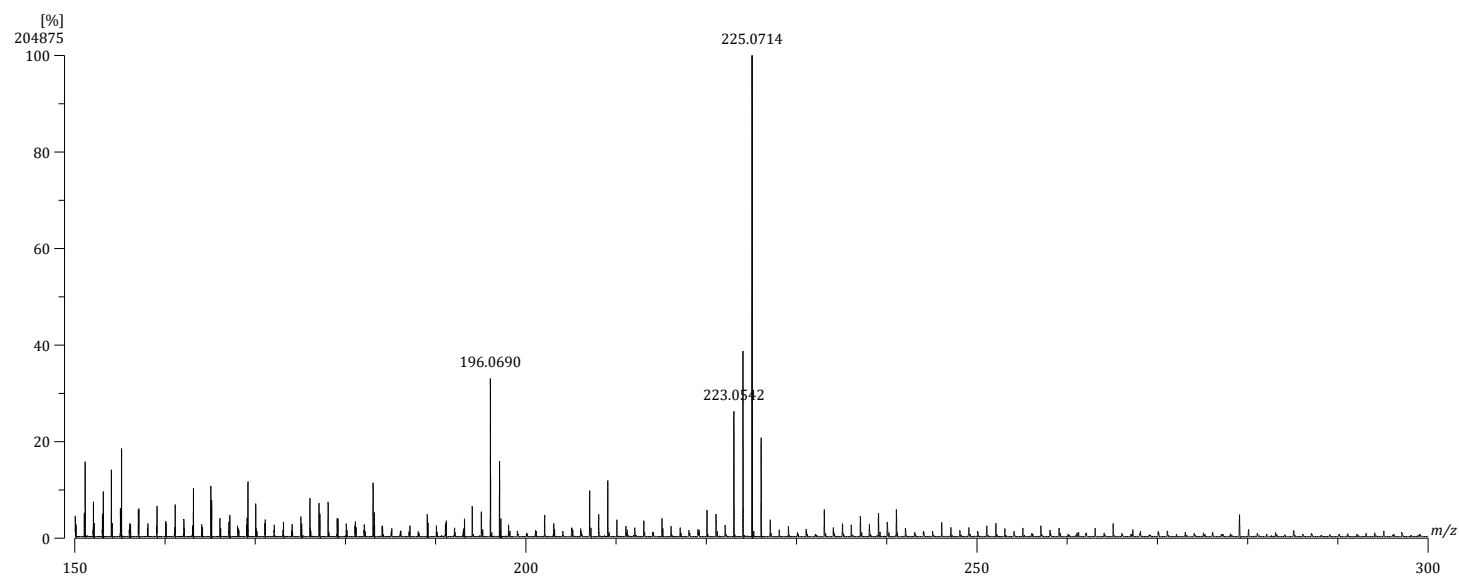

| Observed m/z  | Int%            |      |    |    |   |   |
|---------------|-----------------|------|----|----|---|---|
| 225.0714      | 100.00          |      |    |    |   |   |
| Estimated m/z | Err [ppm / mmu] | U.S. | C  | H  | F | O |
| 1 225.0716    | -0.7 / -0.2     | 10.5 | 15 | 10 | 1 | 1 |

## The high-resolution mass spectrum (FAB+) of compound 2t.

[ Mass Spectrum ]  
Data : 20220421\_CYL-720-HR-003 Date : 21-Apr-2022 16:14  
Sample : CYL-720  
Note : NBA  
Ion Mode : FAB+  
RT : 0.57 min Scan# : 7  
Elements : C 1000/0, H 1000/0, 35Cl 1/0, 37Cl 1/0, O 1/1  
Mass Tolerance : 5mmu  
Unsaturation (U.S.) : -0.5 - 1000.0

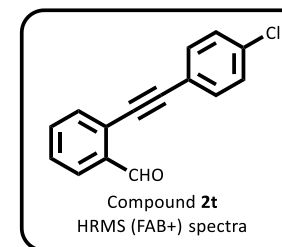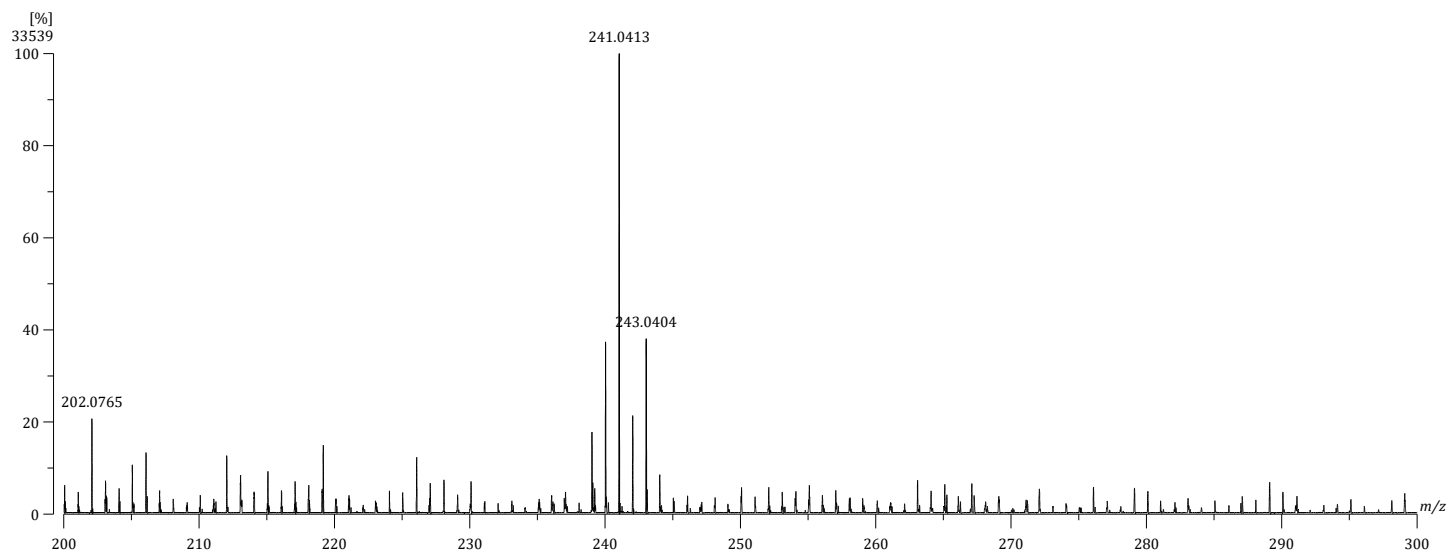

| Observed m/z  | Int%            |      |    |    |      |      |   |
|---------------|-----------------|------|----|----|------|------|---|
| 241.0413      | 100.00          |      |    |    |      |      |   |
| Estimated m/z | Err [ppm / mmu] | U.S. | C  | H  | 35Cl | 37Cl | O |
| 1 241.0420    | -3.0 / -0.7     | 10.5 | 15 | 10 | 1    | -    | 1 |

  

| Observed m/z  | Int%            |      |    |    |      |      |   |
|---------------|-----------------|------|----|----|------|------|---|
| 243.0404      | 38.07           |      |    |    |      |      |   |
| Estimated m/z | Err [ppm / mmu] | U.S. | C  | H  | 35Cl | 37Cl | O |
| 2 243.0391    | +5.5 / +1.3     | 10.5 | 15 | 10 | -    | 1    | 1 |

## The high-resolution mass spectrum (FAB+) of compound 2u.

[ Mass Spectrum ]

Data : 20220420\_CYL-721-HR-003 Date : 20-Apr-2022 17:10

Sample : CYL-721

Note : NBA

Ion Mode : FAB+

RT : 0.00 min Scan# : (1,3)

Elements : C 1000/0, H 1000/0, 79Br 1/0, 81Br 1/0, O 1/1

Mass Tolerance : 5mmu

Unsaturation (U.S.) : -0.5 - 1000.0

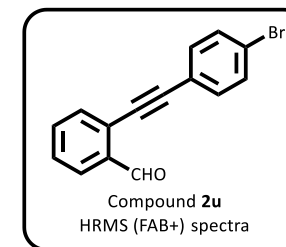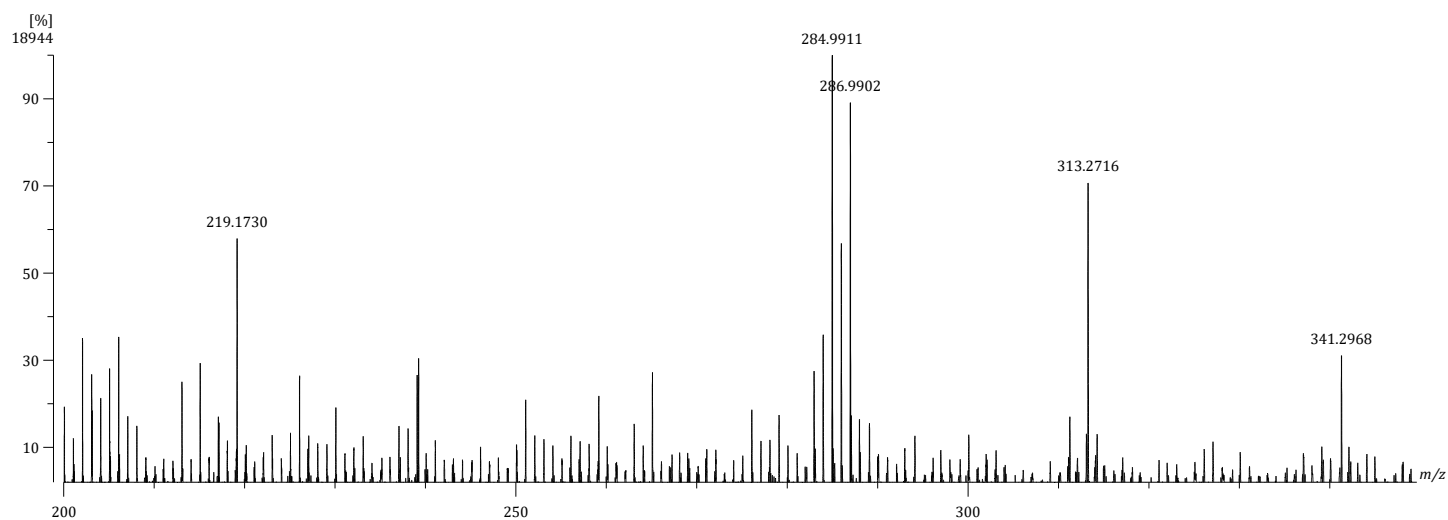

| Observed m/z  | Int%                 |      |    |      |      |   |   |
|---------------|----------------------|------|----|------|------|---|---|
| 284.9911      | 100.00               |      |    |      |      |   |   |
| Estimated m/z | Err [ppm / mmu] U.S. | C    | H  | 79Br | 81Br | O |   |
| 1 284.9915    | -1.4 / -0.4          | 10.5 | 15 | 10   | 1    | - | 1 |

  

| Observed m/z  | Int%                 |      |    |      |      |   |   |
|---------------|----------------------|------|----|------|------|---|---|
| 286.9902      | 89.08                |      |    |      |      |   |   |
| Estimated m/z | Err [ppm / mmu] U.S. | C    | H  | 79Br | 81Br | O |   |
| 2 286.9895    | +2.6 / +0.7          | 10.5 | 15 | 10   | -    | 1 | 1 |

## The high-resolution mass spectrum (FAB+) of compound 2v.

[ Mass Spectrum ]  
Data : 20220421\_CYL-723-HR-002 Date : 21-Apr-2022 16:28  
Sample : CYL-723  
Note : NBA  
Ion Mode : FAB+  
RT : 0.29 min Scan# : 4  
Elements : C 1000/0, H 1000/0, N 1/1, O 3/3  
Mass Tolerance : 50mmu  
Unsaturation (U.S.) : -0.5 - 1000.0

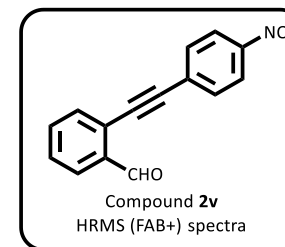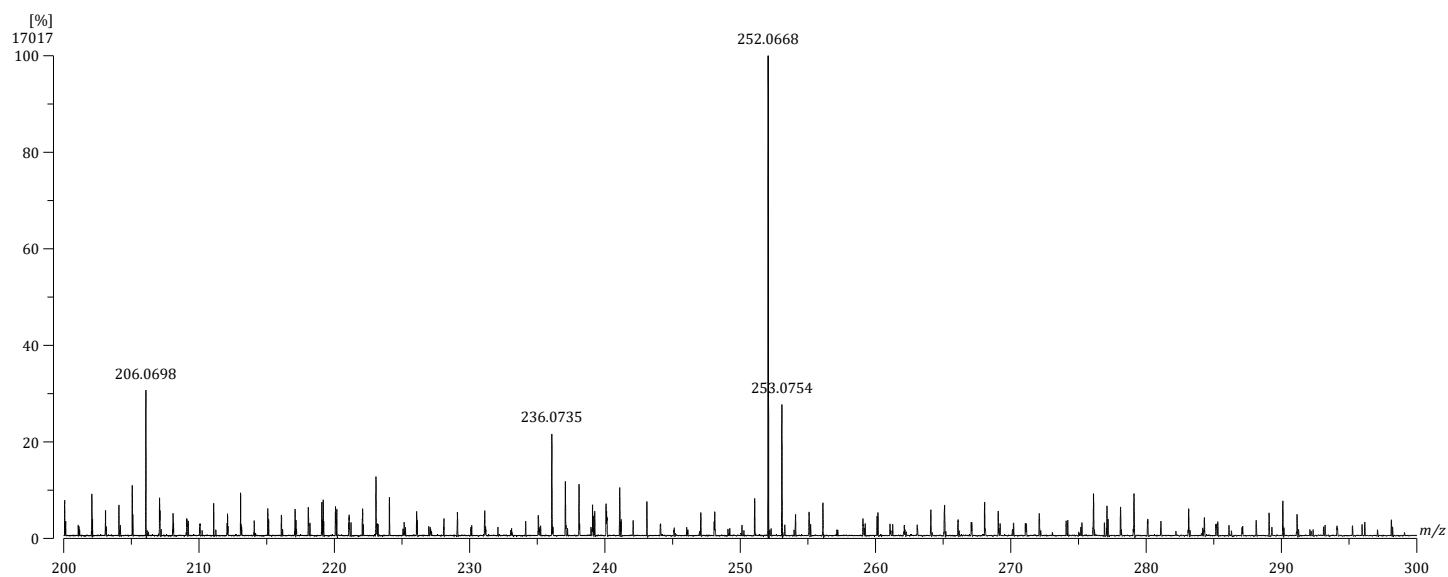

| Observed m/z  | Int%            |      |    |    |   |   |
|---------------|-----------------|------|----|----|---|---|
| 252.0668      | 100.00          |      |    |    |   |   |
| Estimated m/z | Err [ppm / mmu] | U.S. | C  | H  | N | O |
| 1 252.0661    | +2.9 / +0.7     | 11.5 | 15 | 10 | 1 | 3 |

## The high-resolution mass spectrum (FAB+) of compound 2w.

[ Mass Spectrum ]

Data : 20220421\_CYL-725-HR-002 Date : 21-Apr-2022 16:43

Sample : CYL-725

Note : NBA

Ion Mode : FAB+

RT : 0.00 min Scan# : 1

Elements : C 1000/0, H 1000/0, O 3/3

Mass Tolerance : 50mmu

Unsaturation (U.S.) : -0.5 - 1000.0

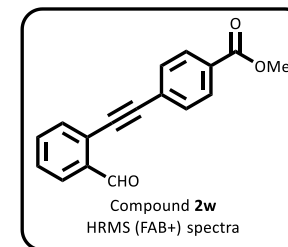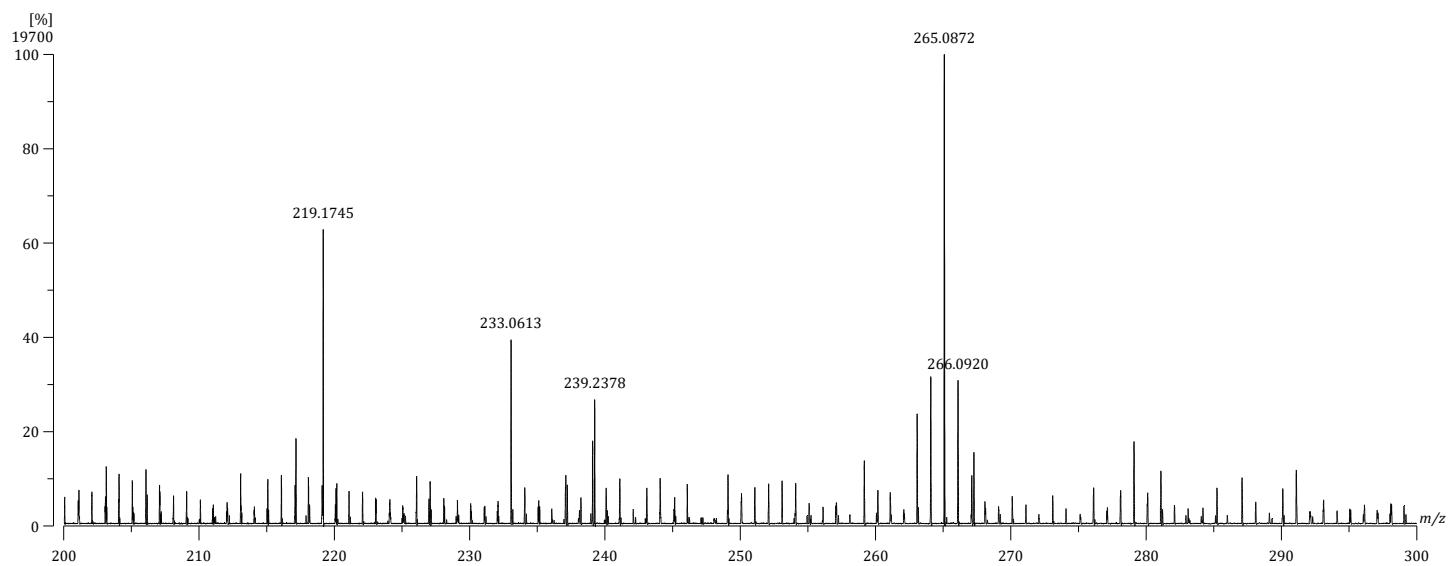

| Observed m/z  | Int%                 |    |    |   |
|---------------|----------------------|----|----|---|
| 265.0872      | 100.00               |    |    |   |
| Estimated m/z | Err [ppm / mmu] U.S. | C  | H  | O |
| 1 265.0865    | +2.8 / +0.7 11.5     | 17 | 13 | 3 |



## The high-resolution mass spectrum (ESI+) of compound 2x.

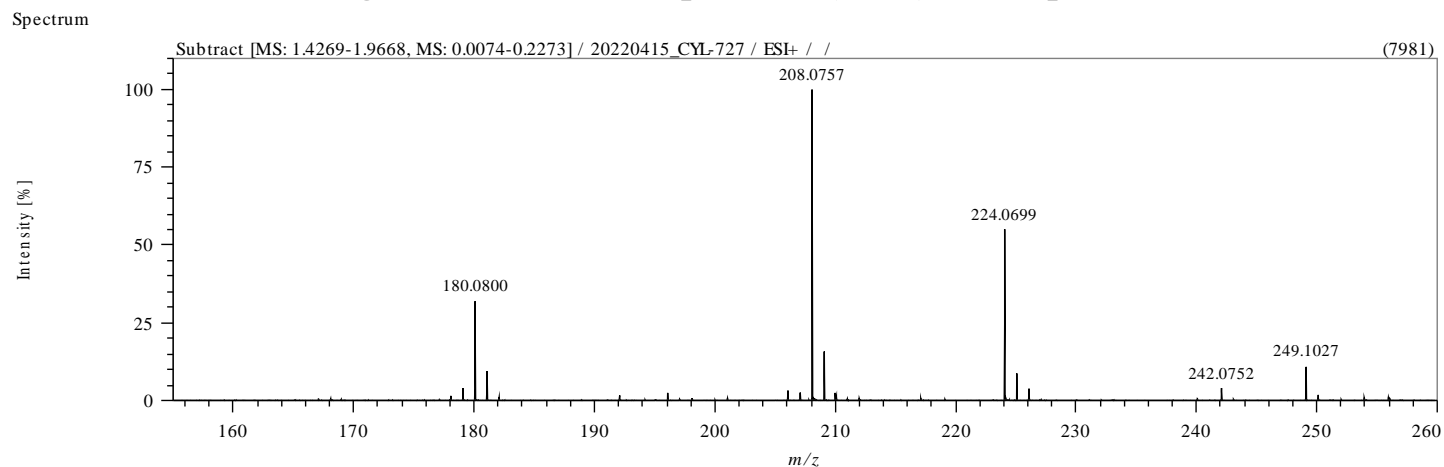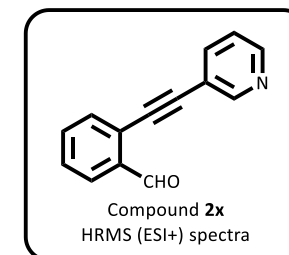

### Elemental Composition

| Parameters |               | Elements Set 1: |     |      |   |   |
|------------|---------------|-----------------|-----|------|---|---|
|            |               | Symbol          | C   | H    | N | O |
| Tolerance: | ± 10.00 ppm   | Min             | 0   | 0    | 1 | 1 |
| Electron:  | Odd/Even      | Max             | 400 | 1000 | 2 | 1 |
| Charge:    | +1            |                 |     |      |   |   |
| DBE:       | -99.0 - 999.0 |                 |     |      |   |   |

### Results

| Mass      | Formula                             | Calculated Mass | Mass Difference [mDa] | Mass Difference [ppm] | DBE  |
|-----------|-------------------------------------|-----------------|-----------------------|-----------------------|------|
| 208.07569 | C <sub>14</sub> H <sub>10</sub> N O | 208.07569       | 0.00                  | 0.01                  | 10.5 |

## The high-resolution mass spectrum (ESI+) of compound 1a.

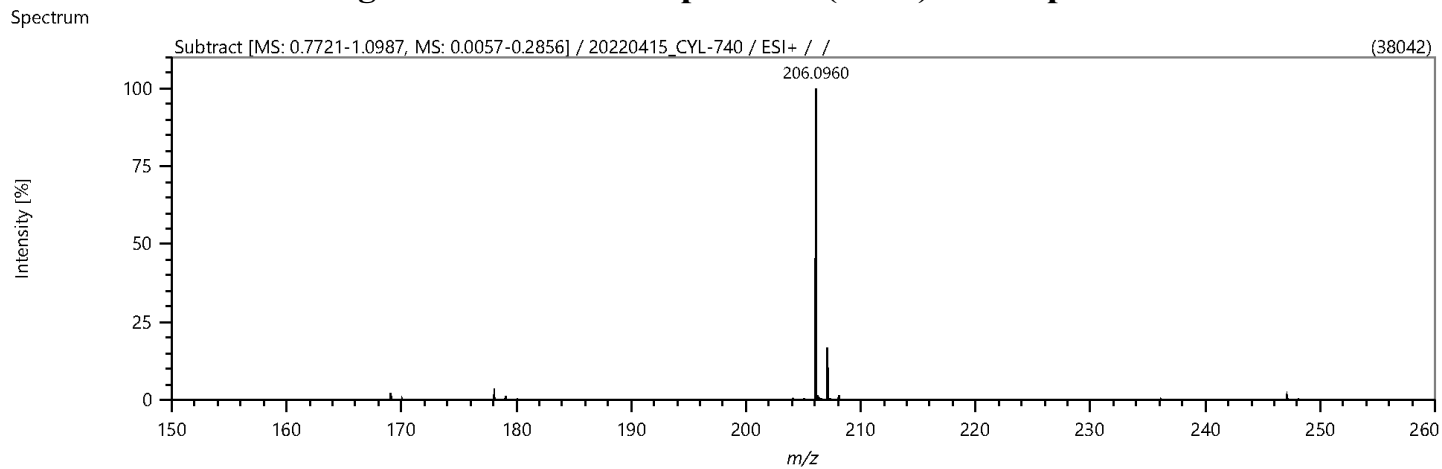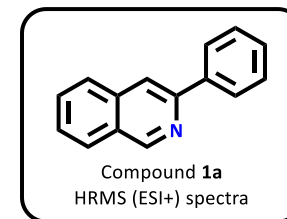

### Elemental Composition

#### Parameters

Tolerance:  $\pm 10.00$  ppm  
Electron: Odd/Even  
Charge: +1  
DBE: -99.0 - 999.0

#### Elements Set 1:

| Symbol | C   | H    | N |
|--------|-----|------|---|
| Min    | 0   | 0    | 1 |
| Max    | 400 | 1000 | 2 |

### Results

| Mass      | Formula                           | Calculated Mass | Mass Difference [mDa] | Mass Difference [ppm] | DBE  |
|-----------|-----------------------------------|-----------------|-----------------------|-----------------------|------|
| 206.09597 | C <sub>15</sub> H <sub>12</sub> N | 206.09643       | -0.46                 | -2.23                 | 10.5 |

## The high-resolution mass spectrum (ESI+) of compound 1b.

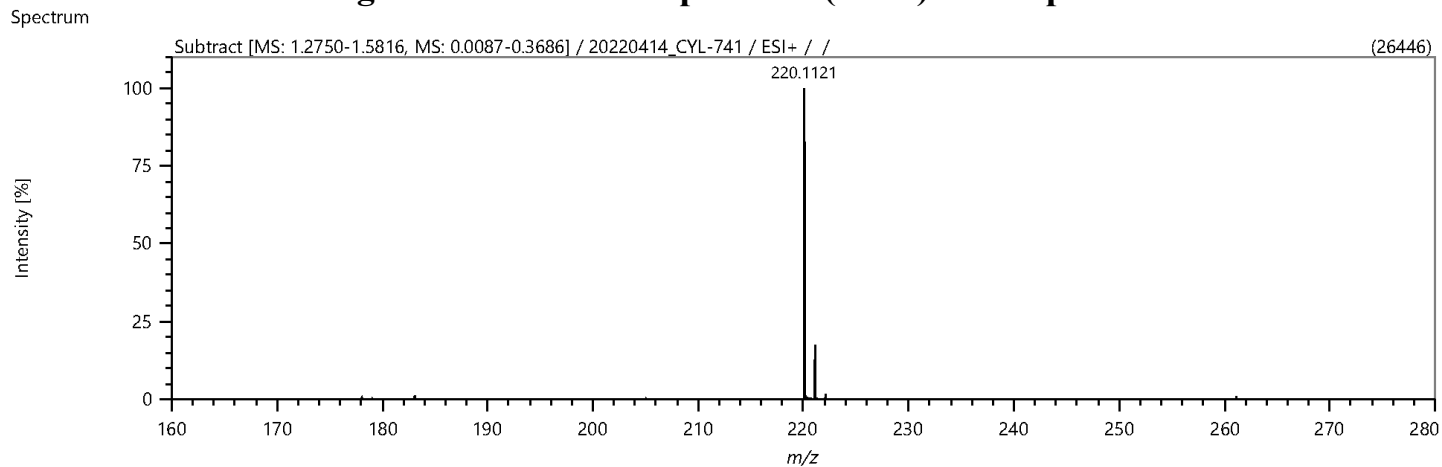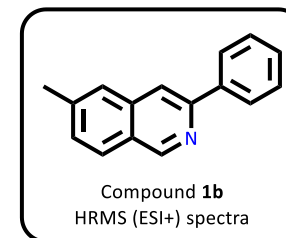

### Elemental Composition

#### Parameters

Tolerance:  $\pm 20.00$  ppm  
 Electron: Odd/Even  
 Charge: +1  
 DBE: -99.0 - 999.0

#### Elements Set 1:

| Symbol | C   | H    | N |
|--------|-----|------|---|
| Min    | 0   | 0    | 1 |
| Max    | 400 | 1000 | 2 |

### Results

| Mass      | Formula                           | Calculated Mass | Mass Difference [mDa] | Mass Difference [ppm] | DBE  |
|-----------|-----------------------------------|-----------------|-----------------------|-----------------------|------|
| 220.11207 | C <sub>16</sub> H <sub>14</sub> N | 220.11208       | -0.01                 | -0.04                 | 10.5 |

## The high-resolution mass spectrum (ESI+) of compound 1c.

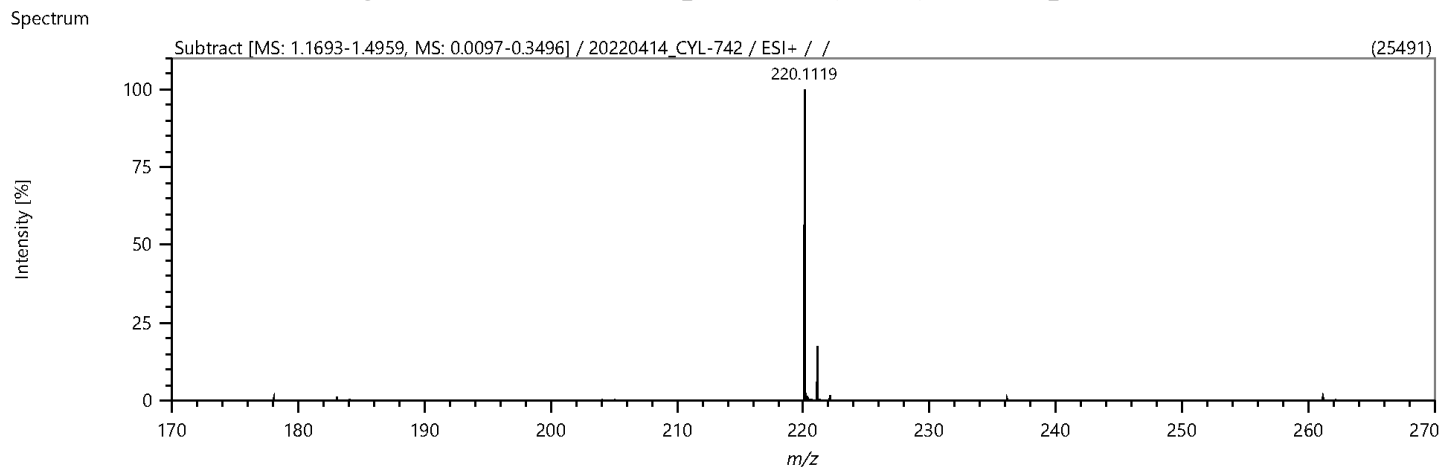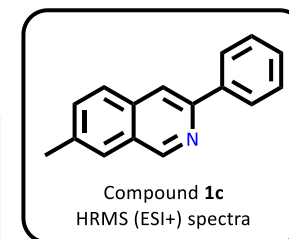

### Elemental Composition

#### Parameters

Tolerance:  $\pm 20.00$  ppm  
 Electron: Odd/Even  
 Charge: +1  
 DBE: -99.0 - 999.0

#### Elements Set 1:

| Symbol | C   | H    | N |
|--------|-----|------|---|
| Min    | 0   | 0    | 1 |
| Max    | 400 | 1000 | 1 |

### Results

| Mass      | Formula                           | Calculated Mass | Mass Difference [mDa] | Mass Difference [ppm] | DBE  |
|-----------|-----------------------------------|-----------------|-----------------------|-----------------------|------|
| 220.11189 | C <sub>16</sub> H <sub>14</sub> N | 220.11208       | -0.18                 | -0.82                 | 10.5 |

## The high-resolution mass spectrum (ESI+) of compound 1d.

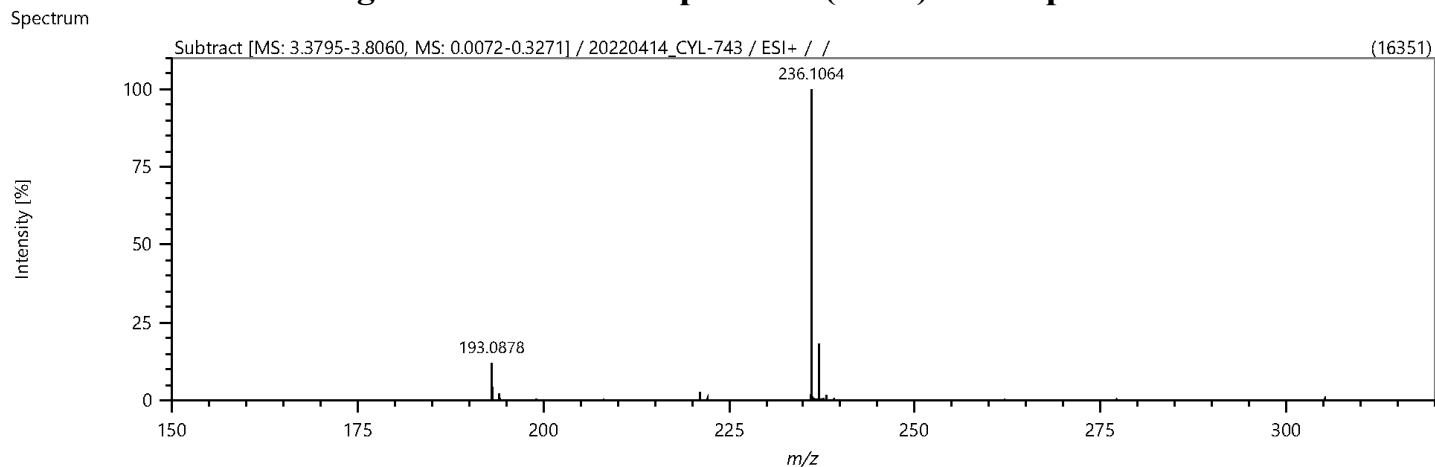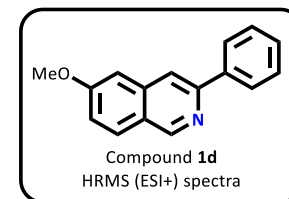

### Elemental Composition

#### Parameters

Tolerance:  $\pm 20.00$  ppm  
 Electron: Odd/Even  
 Charge: +1  
 DBE: -99.0 - 999.0

#### Elements Set 1:

| Symbol | C   | H    | N | O |
|--------|-----|------|---|---|
| Min    | 0   | 0    | 1 | 1 |
| Max    | 400 | 1000 | 1 | 1 |

### Results

| Mass      | Formula                             | Calculated Mass | Mass Difference [mDa] | Mass Difference [ppm] | DBE  |
|-----------|-------------------------------------|-----------------|-----------------------|-----------------------|------|
| 236.10642 | C <sub>16</sub> H <sub>14</sub> N O | 236.10699       | -0.57                 | -2.42                 | 10.5 |

## The high-resolution mass spectrum (ESI+) of compound 1e.

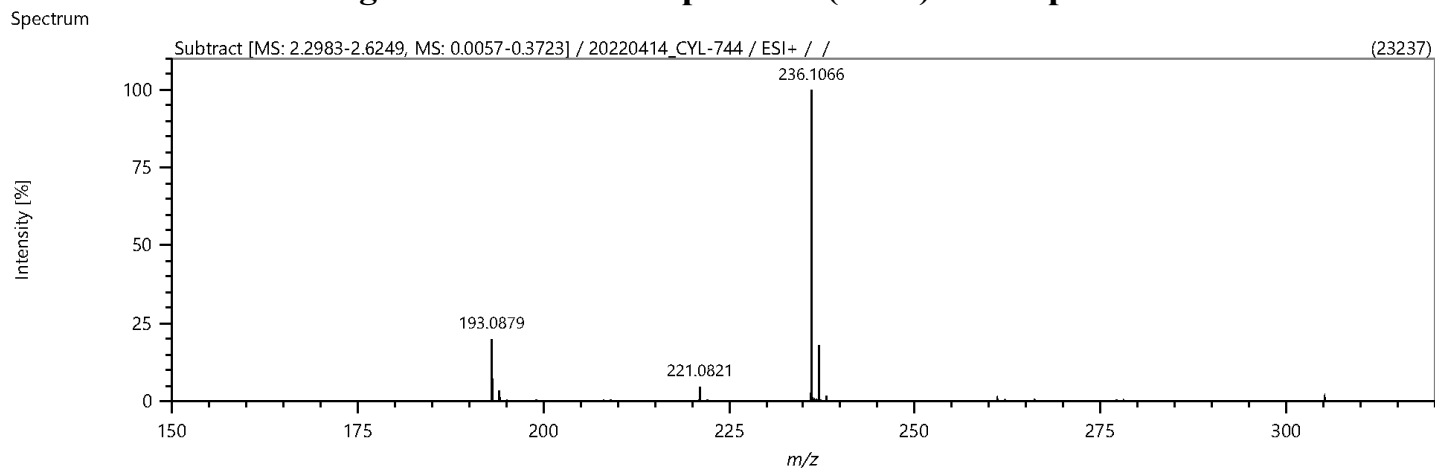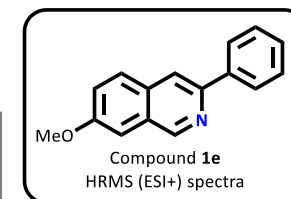

### Elemental Composition

Parameters

Tolerance:  $\pm 20.00$  ppm  
 Electron: Odd/Even  
 Charge: +1  
 DBE: -99.0 - 999.0

Elements Set 1:

| Symbol | C   | H    | N | O |
|--------|-----|------|---|---|
| Min    | 0   | 0    | 1 | 1 |
| Max    | 400 | 1000 | 1 | 2 |

### Results

| Mass      | Formula                             | Calculated Mass | Mass Difference [mDa] | Mass Difference [ppm] | DBE  |
|-----------|-------------------------------------|-----------------|-----------------------|-----------------------|------|
| 236.10663 | C <sub>16</sub> H <sub>14</sub> N O | 236.10699       | -0.36                 | -1.51                 | 10.5 |

## The high-resolution mass spectrum (ESI+) of compound 1f.

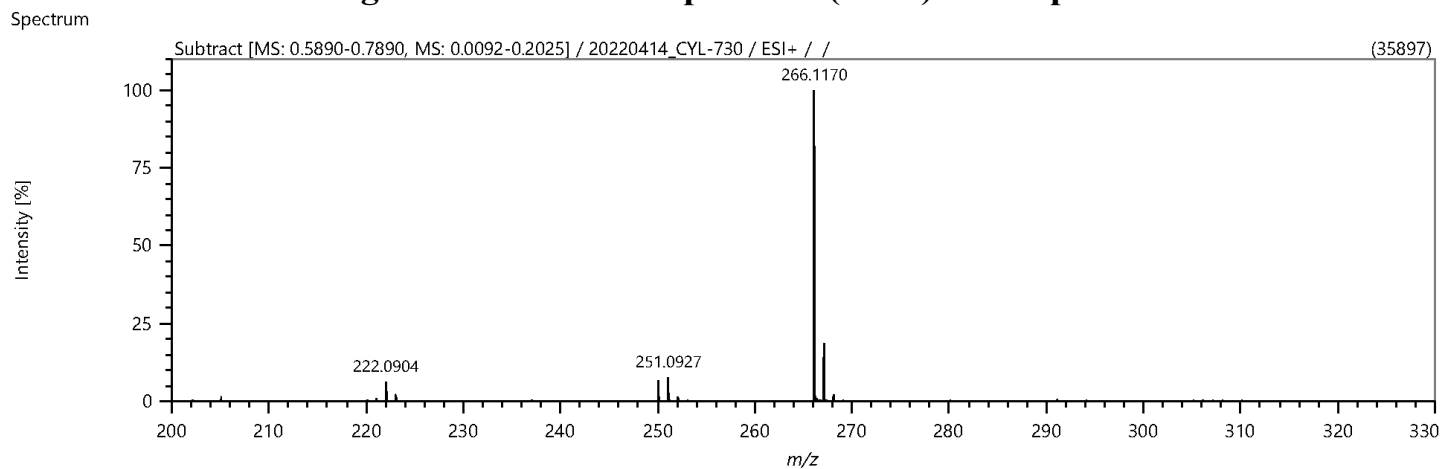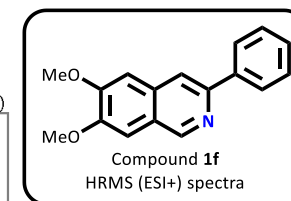

### Elemental Composition

Parameters

Tolerance:  $\pm 20.00$  ppm  
 Electron: Odd/Even  
 Charge: +1  
 DBE: -99.0 - 999.0

Elements Set 1:

| Symbol | C   | H    | N | O |
|--------|-----|------|---|---|
| Min    | 0   | 0    | 1 | 2 |
| Max    | 400 | 1000 | 1 | 2 |

### Results

| Mass      | Formula                                          | Calculated Mass | Mass Difference [mDa] | Mass Difference [ppm] | DBE  |
|-----------|--------------------------------------------------|-----------------|-----------------------|-----------------------|------|
| 266.11705 | C <sub>17</sub> H <sub>16</sub> N O <sub>2</sub> | 266.11756       | -0.51                 | -1.91                 | 10.5 |

## The high-resolution mass spectrum (ESI+) of compound 1g.

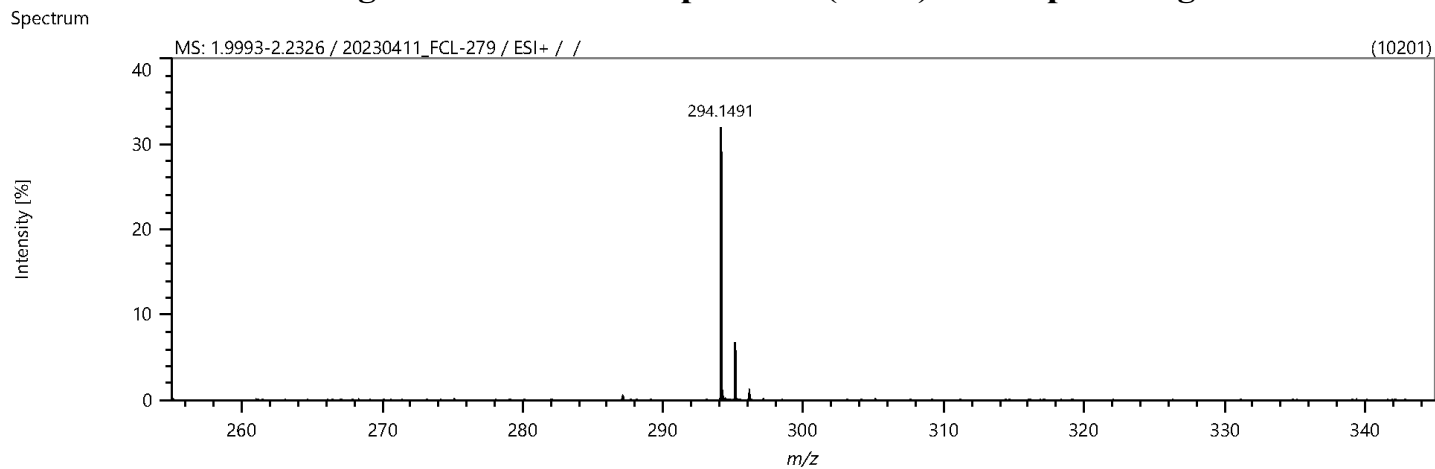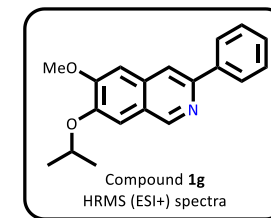

### Elemental Composition

#### Parameters

Tolerance:  $\pm 5.00$  ppm  
 Electron: Odd/Even  
 Charge: +1  
 DBE: -99.0 - 999.0

#### Elements Set 1:

| Symbol | C   | H   | O | N | Na |
|--------|-----|-----|---|---|----|
| Min    | 0   | 0   | 2 | 1 | 0  |
| Max    | 100 | 400 | 2 | 1 | 1  |

### Results

| Mass      | Formula                                          | Calculated Mass | Mass Difference [mDa] | Mass Difference [ppm] | DBE  |
|-----------|--------------------------------------------------|-----------------|-----------------------|-----------------------|------|
| 294.14907 | C <sub>19</sub> H <sub>20</sub> N O <sub>2</sub> | 294.14886       | 0.21                  | 0.72                  | 10.5 |



## The high-resolution mass spectrum (ESI+) of compound 1h.

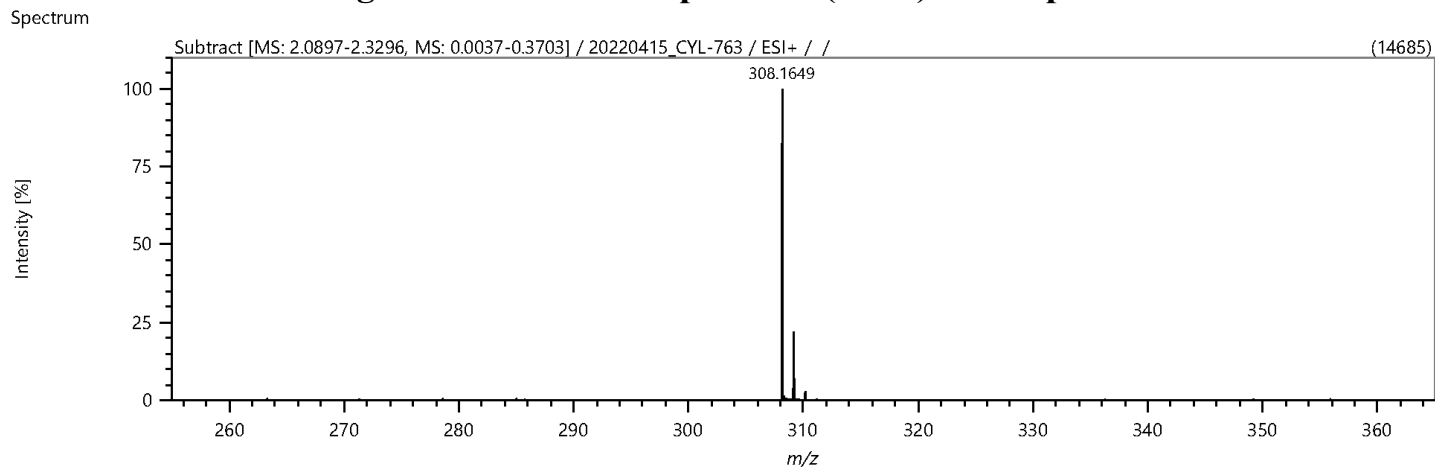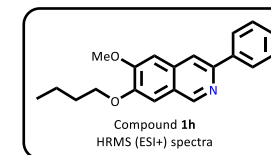

### Elemental Composition

#### Parameters

Tolerance:  $\pm 10.00$  ppm  
 Electron: Odd/Even  
 Charge: +1  
 DBE: -99.0 - 999.0

#### Elements Set 1:

| Symbol | C   | H    | N | O |
|--------|-----|------|---|---|
| Min    | 0   | 0    | 1 | 1 |
| Max    | 400 | 1000 | 2 | 2 |

### Results

| Mass      | Formula                                          | Calculated Mass | Mass Difference [mDa] | Mass Difference [ppm] | DBE  |
|-----------|--------------------------------------------------|-----------------|-----------------------|-----------------------|------|
| 308.16491 | C <sub>20</sub> H <sub>22</sub> N O <sub>2</sub> | 308.16451       | 0.41                  | 1.33                  | 10.5 |

## The high-resolution mass spectrum (ESI+) of compound 1i.

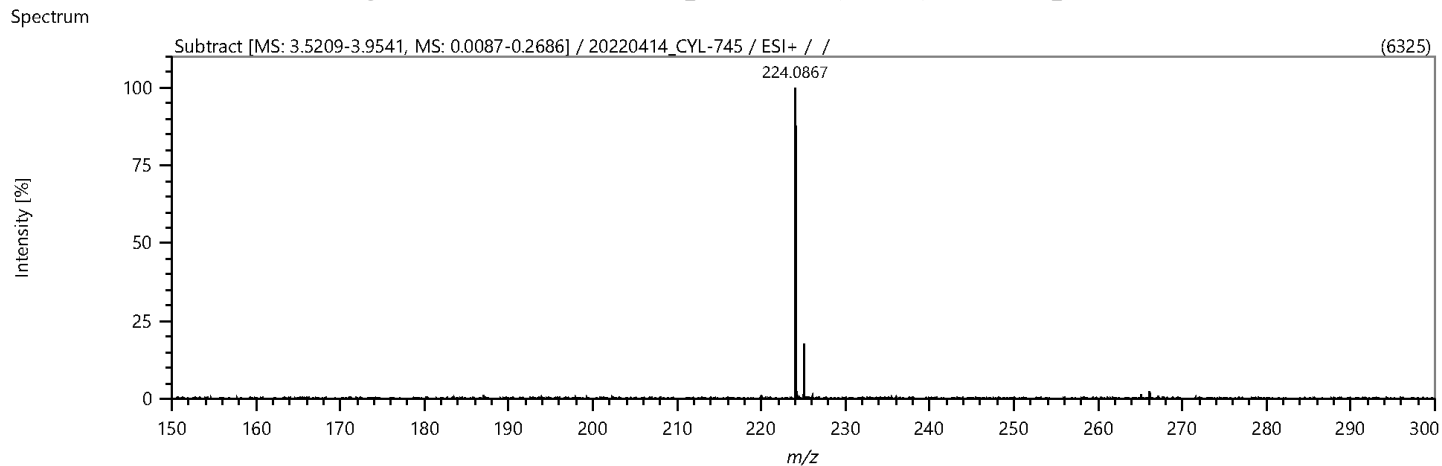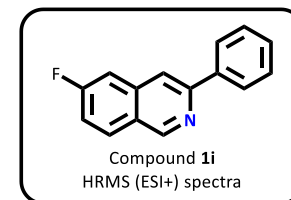

### Elemental Composition

#### Parameters

Tolerance:  $\pm 20.00$  ppm  
 Electron: Odd/Even  
 Charge: +1  
 DBE: -99.0 - 999.0

#### Elements Set 1:

| Symbol | C   | H    | N | F |
|--------|-----|------|---|---|
| Min    | 0   | 0    | 1 | 1 |
| Max    | 400 | 1000 | 1 | 1 |

### Results

| Mass      | Formula                            | Calculated Mass | Mass Difference [mDa] | Mass Difference [ppm] | DBE  |
|-----------|------------------------------------|-----------------|-----------------------|-----------------------|------|
| 224.08673 | C <sub>15</sub> H <sub>11</sub> NF | 224.08700       | -0.27                 | -1.22                 | 10.5 |

## The high-resolution mass spectrum (ESI+) of compound 1j.

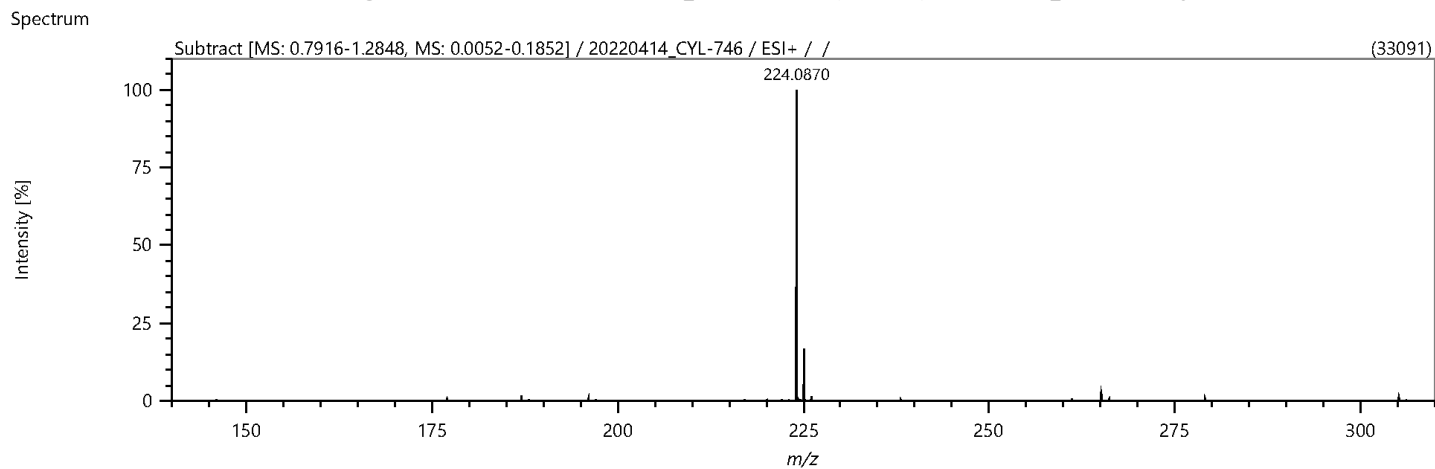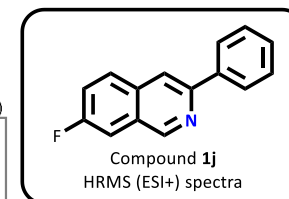

### Elemental Composition

#### Parameters

Tolerance:  $\pm 20.00$  ppm  
 Electron: Odd/Even  
 Charge: +1  
 DBE: -99.0 - 999.0

#### Elements Set 1:

| Symbol | C   | H    | N | F |
|--------|-----|------|---|---|
| Min    | 0   | 0    | 1 | 1 |
| Max    | 400 | 1000 | 1 | 1 |

### Results

| Mass      | Formula                             | Calculated Mass | Mass Difference [mDa] | Mass Difference [ppm] | DBE  |
|-----------|-------------------------------------|-----------------|-----------------------|-----------------------|------|
| 224.08705 | C <sub>15</sub> H <sub>11</sub> N F | 224.08700       | 0.04                  | 0.19                  | 10.5 |

## The high-resolution mass spectrum (ESI+) of compound 1k.

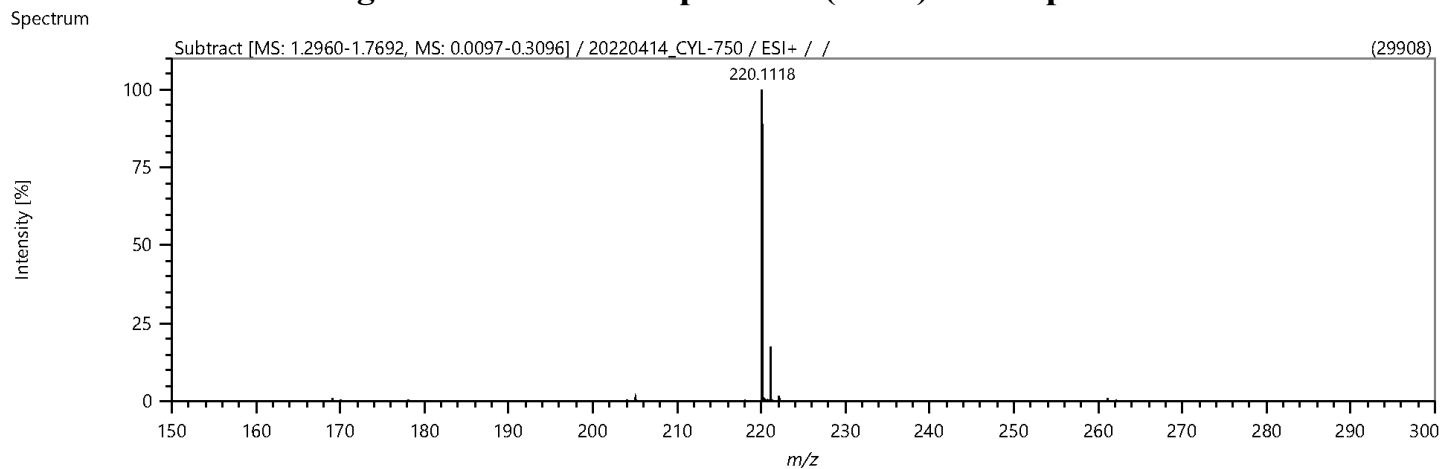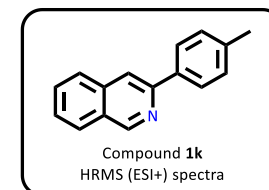

### Elemental Composition

| Parameters |               | Elements Set 1: |     |      |   |
|------------|---------------|-----------------|-----|------|---|
| Tolerance: | ±20.00 ppm    | Symbol          | C   | H    | N |
| Electron:  | Odd/Even      | Min             | 0   | 0    | 1 |
| Charge:    | +1            | Max             | 400 | 1000 | 1 |
| DBE:       | -99.0 - 999.0 |                 |     |      |   |

### Results

| Mass      | Formula                           | Calculated Mass | Mass Difference [mDa] | Mass Difference [ppm] | DBE  |
|-----------|-----------------------------------|-----------------|-----------------------|-----------------------|------|
| 220.11181 | C <sub>16</sub> H <sub>14</sub> N | 220.11208       | -0.27                 | -1.23                 | 10.5 |

## The high-resolution mass spectrum (ESI+) of compound 1l.

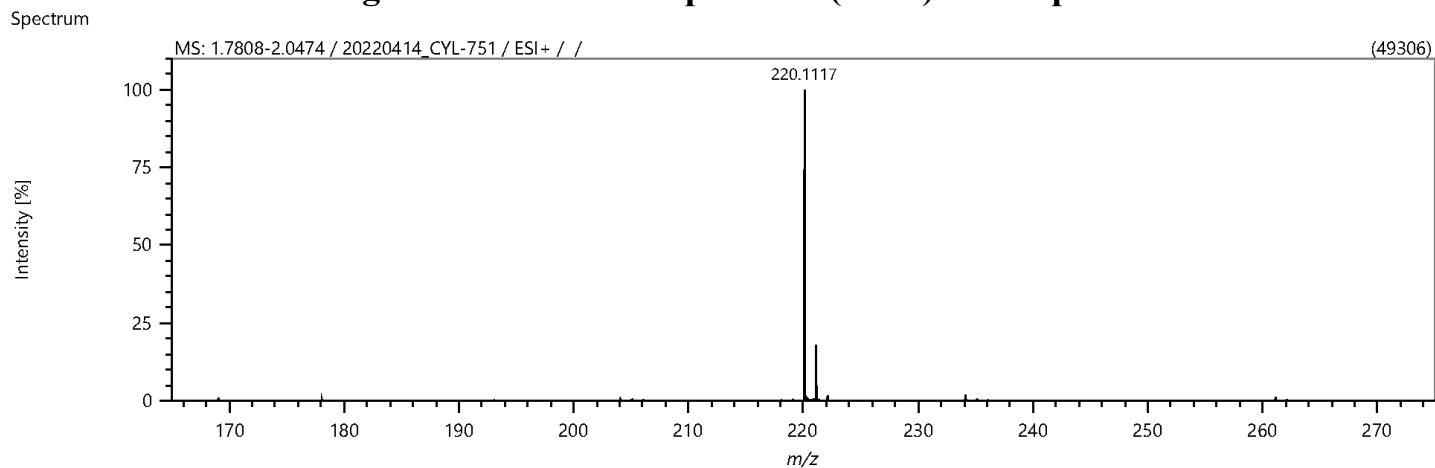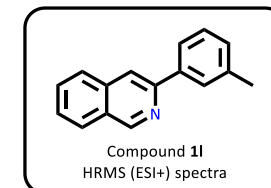

### Elemental Composition

#### Parameters

Tolerance:  $\pm 20.00$  ppm  
 Electron: Odd/Even  
 Charge: +1  
 DBE: -99.0 - 999.0

#### Elements Set 1:

| Symbol | C   | H    | N |
|--------|-----|------|---|
| Min    | 0   | 0    | 1 |
| Max    | 400 | 1000 | 1 |

### Results

| Mass      | Formula                           | Calculated Mass | Mass Difference [mDa] | Mass Difference [ppm] | DBE  |
|-----------|-----------------------------------|-----------------|-----------------------|-----------------------|------|
| 220.11171 | C <sub>16</sub> H <sub>14</sub> N | 220.11208       | -0.36                 | -1.64                 | 10.5 |

## The high-resolution mass spectrum (ESI+) of compound 1m.

Spectrum

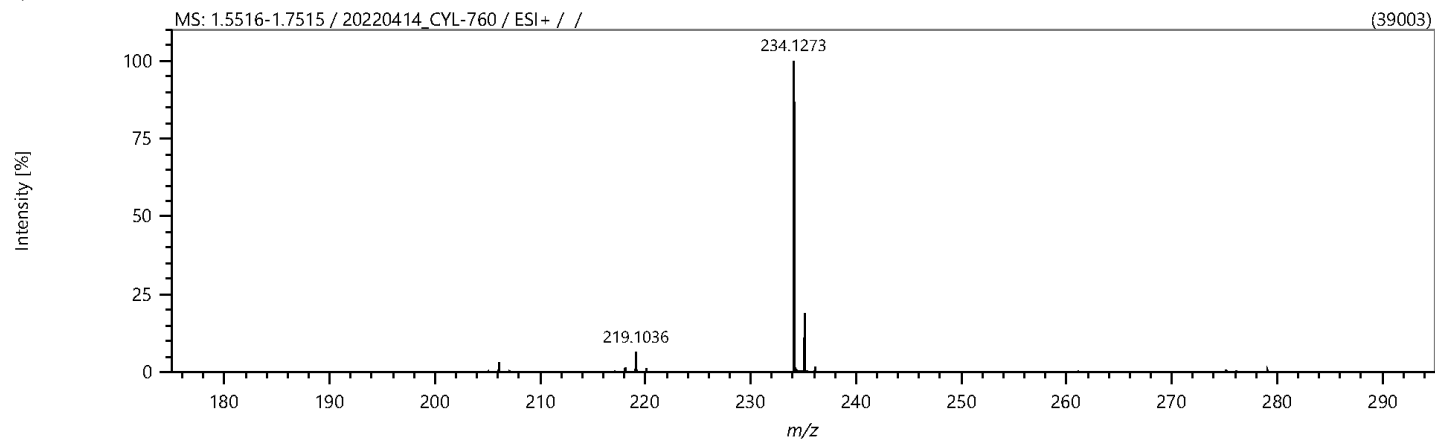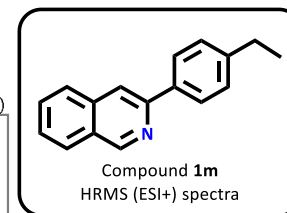

### Elemental Composition

Parameters

Tolerance: ±20.00 ppm

Electron: Odd/Even

Charge: +1

DBE: -99.0 - 999.0

Elements Set 1:

| Symbol | C   | H    | N |
|--------|-----|------|---|
| Min    | 0   | 0    | 1 |
| Max    | 400 | 1000 | 1 |

### Results

| Mass      | Formula                           | Calculated Mass | Mass Difference [mDa] | Mass Difference [ppm] | DBE  |
|-----------|-----------------------------------|-----------------|-----------------------|-----------------------|------|
| 234.12734 | C <sub>17</sub> H <sub>16</sub> N | 234.12773       | -0.38                 | -1.64                 | 10.5 |

1 / 1

S-138

## The high-resolution mass spectrum (ESI+) of compound 1n.

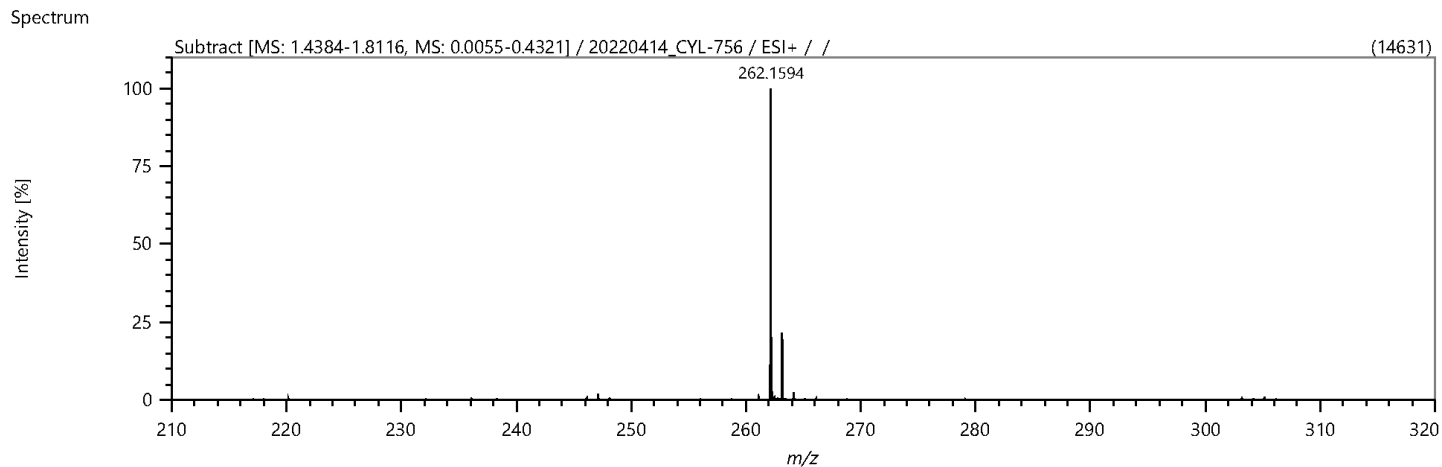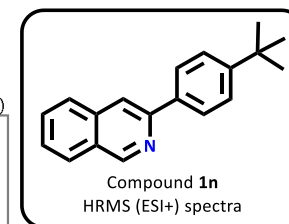

### Elemental Composition

#### Parameters

Tolerance:  $\pm 20.00$  ppm  
 Electron: Odd/Even  
 Charge: +1  
 DBE: -99.0 - 999.0

#### Elements Set 1:

| Symbol | C   | H    | N |
|--------|-----|------|---|
| Min    | 0   | 0    | 1 |
| Max    | 400 | 1000 | 1 |

### Results

| Mass      | Formula                           | Calculated Mass | Mass Difference [mDa] | Mass Difference [ppm] | DBE  |
|-----------|-----------------------------------|-----------------|-----------------------|-----------------------|------|
| 262.15936 | C <sub>19</sub> H <sub>20</sub> N | 262.15903       | 0.33                  | 1.26                  | 10.5 |

## The high-resolution mass spectrum (ESI+) of compound 1o.

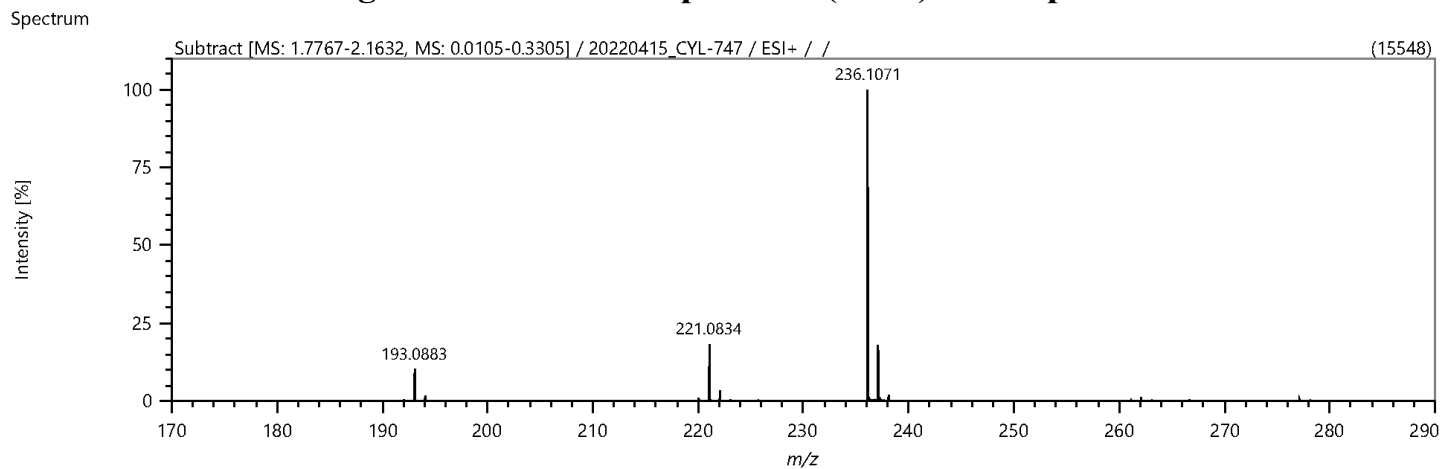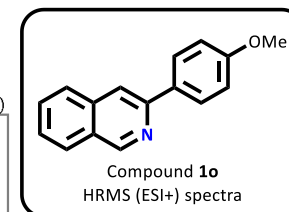

### Elemental Composition

#### Parameters

Tolerance: ±10.00 ppm  
 Electron: Odd/Even  
 Charge: +1  
 DBE: -99.0 - 999.0

#### Elements Set 1:

| Symbol | C   | H    | N | O |
|--------|-----|------|---|---|
| Min    | 0   | 0    | 1 | 1 |
| Max    | 400 | 1000 | 2 | 2 |

### Results

| Mass      | Formula                             | Calculated Mass | Mass Difference [mDa] | Mass Difference [ppm] | DBE  |
|-----------|-------------------------------------|-----------------|-----------------------|-----------------------|------|
| 236.10712 | C <sub>16</sub> H <sub>14</sub> N O | 236.10699       | 0.13                  | 0.55                  | 10.5 |



## The high-resolution mass spectrum (ESI+) of compound 1p.

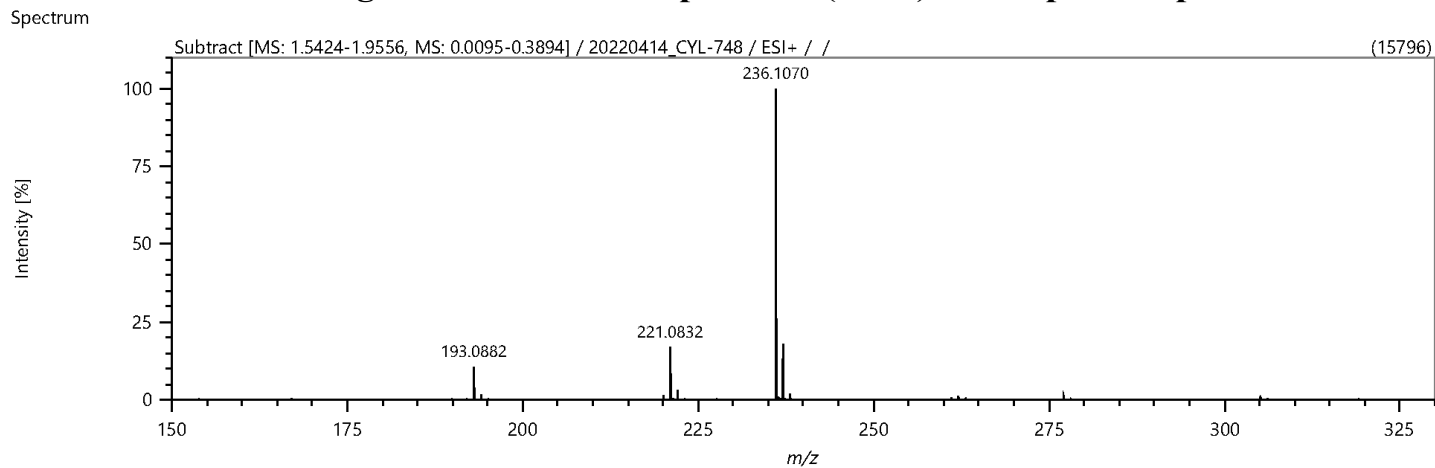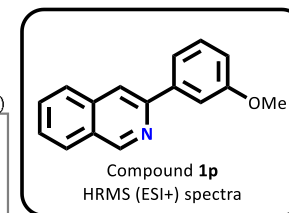

### Elemental Composition

#### Parameters

Tolerance:  $\pm 10.00$  ppm  
 Electron: Odd/Even  
 Charge: +1  
 DBE: -99.0 - 999.0

#### Elements Set 1:

| Symbol | C   | H    | N | O |
|--------|-----|------|---|---|
| Min    | 0   | 0    | 1 | 1 |
| Max    | 400 | 1000 | 2 | 1 |

### Results

| Mass      | Formula                             | Calculated Mass | Mass Difference [mDa] | Mass Difference [ppm] | DBE  |
|-----------|-------------------------------------|-----------------|-----------------------|-----------------------|------|
| 236.10697 | C <sub>16</sub> H <sub>14</sub> N O | 236.10699       | -0.02                 | -0.07                 | 10.5 |

## The high-resolution mass spectrum (ESI+) of compound 1q.

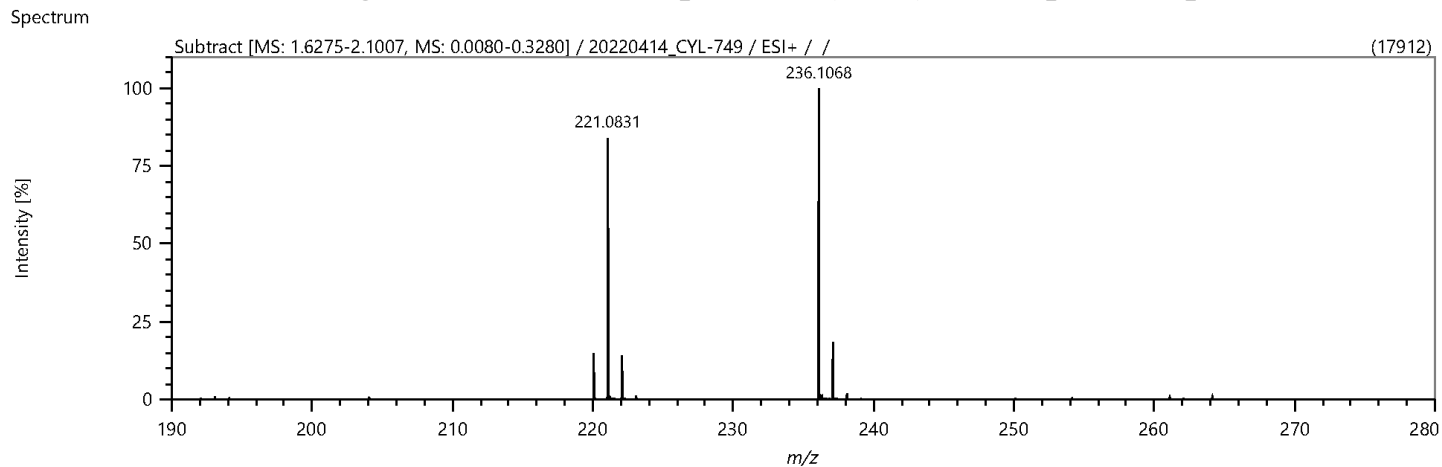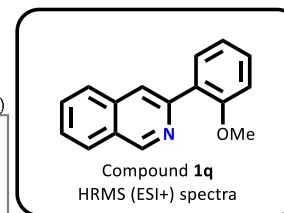

### Elemental Composition

#### Parameters

Tolerance: ±10.00 ppm  
 Electron: Odd/Even  
 Charge: +1  
 DBE: -99.0 - 999.0

#### Elements Set 1:

| Symbol | C   | H    | N | O |
|--------|-----|------|---|---|
| Min    | 0   | 0    | 1 | 1 |
| Max    | 400 | 1000 | 2 | 2 |

### Results

| Mass      | Formula                             | Calculated Mass | Mass Difference [mDa] | Mass Difference [ppm] | DBE  |
|-----------|-------------------------------------|-----------------|-----------------------|-----------------------|------|
| 236.10682 | C <sub>16</sub> H <sub>14</sub> N O | 236.10699       | -0.17                 | -0.72                 | 10.5 |

## The high-resolution mass spectrum (ESI+) of compound 1r.

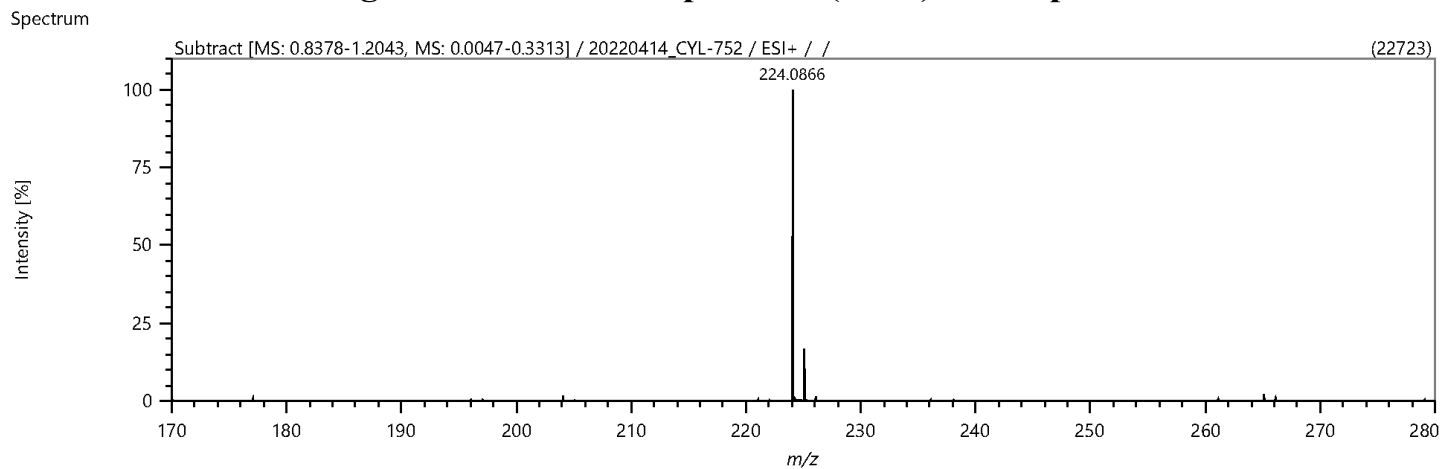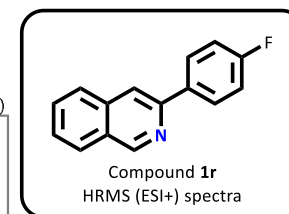

### Elemental Composition

#### Parameters

Tolerance:  $\pm 10.00$  ppm  
Electron: Odd/Even  
Charge: +1  
DBE: -99.0 - 999.0

#### Elements Set 1:

| Symbol | C   | H    | N | F |
|--------|-----|------|---|---|
| Min    | 0   | 0    | 1 | 1 |
| Max    | 400 | 1000 | 2 | 1 |

### Results

| Mass      | Formula                            | Calculated Mass | Mass Difference [mDa] | Mass Difference [ppm] | DBE  |
|-----------|------------------------------------|-----------------|-----------------------|-----------------------|------|
| 224.08661 | C <sub>15</sub> H <sub>11</sub> NF | 224.08700       | -0.40                 | -1.77                 | 10.5 |

## The high-resolution mass spectrum (ESI+) of compound 1s.

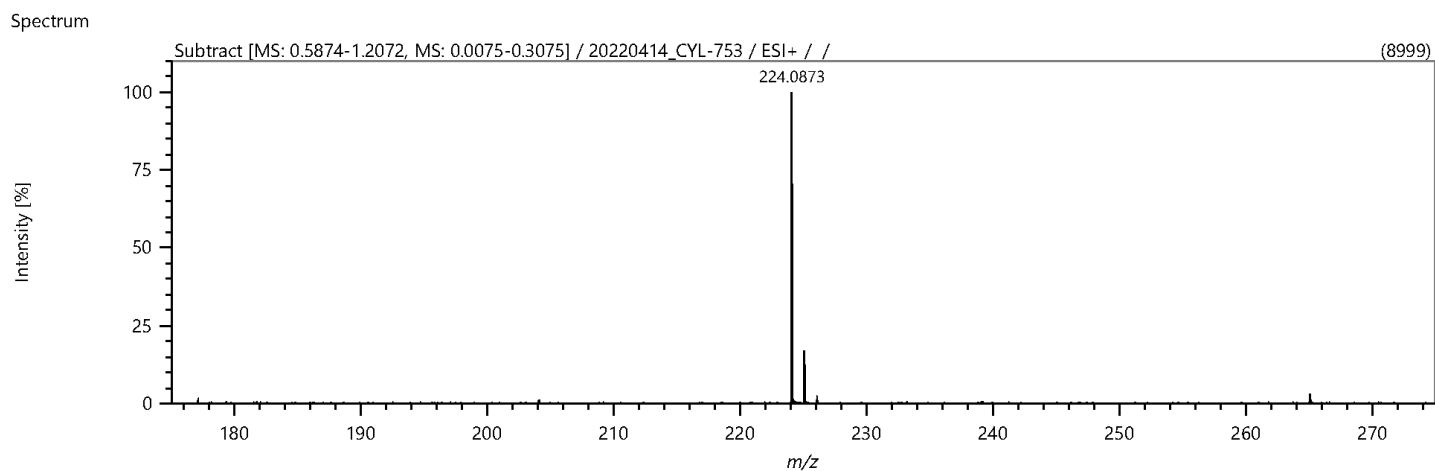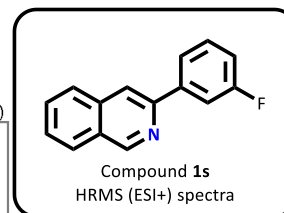

### Elemental Composition

#### Parameters

Tolerance:  $\pm 10.00$  ppm  
 Electron: Odd/Even  
 Charge: +1  
 DBE: -99.0 - 999.0

#### Elements Set 1:

| Symbol | C   | H    | N | F |
|--------|-----|------|---|---|
| Min    | 0   | 0    | 1 | 1 |
| Max    | 400 | 1000 | 2 | 2 |

### Results

| Mass      | Formula                            | Calculated Mass | Mass Difference [mDa] | Mass Difference [ppm] | DBE  |
|-----------|------------------------------------|-----------------|-----------------------|-----------------------|------|
| 224.08727 | C <sub>15</sub> H <sub>11</sub> NF | 224.08700       | 0.26                  | 1.18                  | 10.5 |

## The high-resolution mass spectrum (ESI+) of compound 1t.

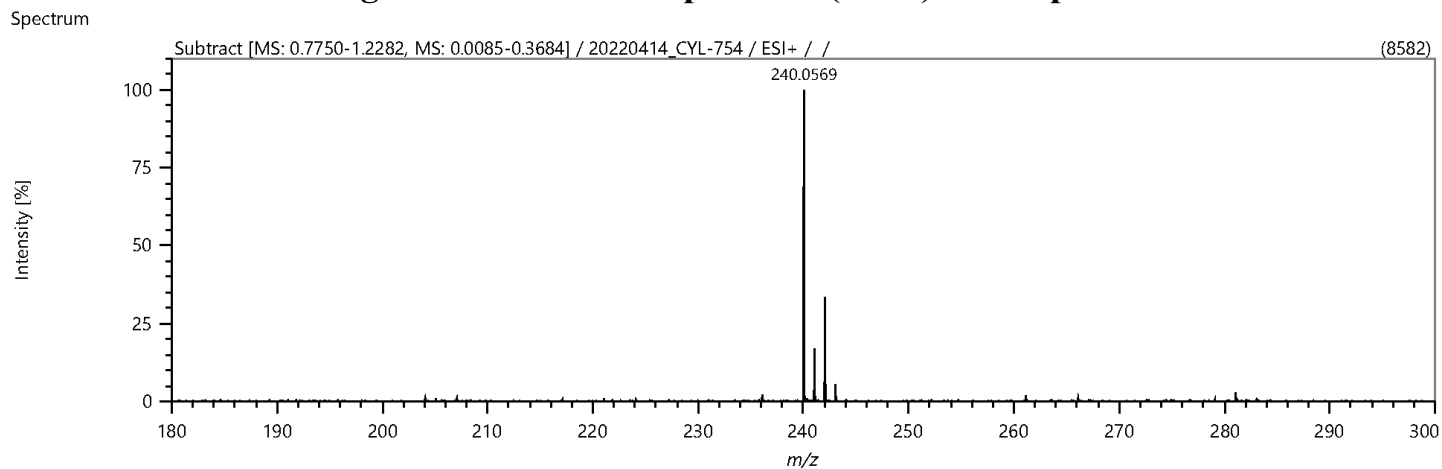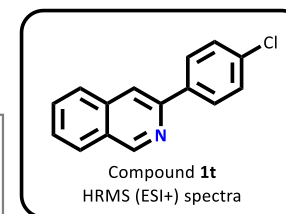

### Elemental Composition

#### Parameters

Tolerance:  $\pm 10.00$  ppm  
 Electron: Odd/Even  
 Charge: +1  
 DBE: -99.0 - 999.0

#### Elements Set 1:

| Symbol | C   | H    | N | Cl |
|--------|-----|------|---|----|
| Min    | 0   | 0    | 1 | 1  |
| Max    | 400 | 1000 | 2 | 1  |

### Results

| Mass      | Formula                              | Calculated Mass | Mass Difference [mDa] | Mass Difference [ppm] | DBE  |
|-----------|--------------------------------------|-----------------|-----------------------|-----------------------|------|
| 240.05686 | C <sub>15</sub> H <sub>11</sub> N Cl | 240.05745       | -0.59                 | -2.46                 | 10.5 |

## The high-resolution mass spectrum (ESI+) of compound 1u.

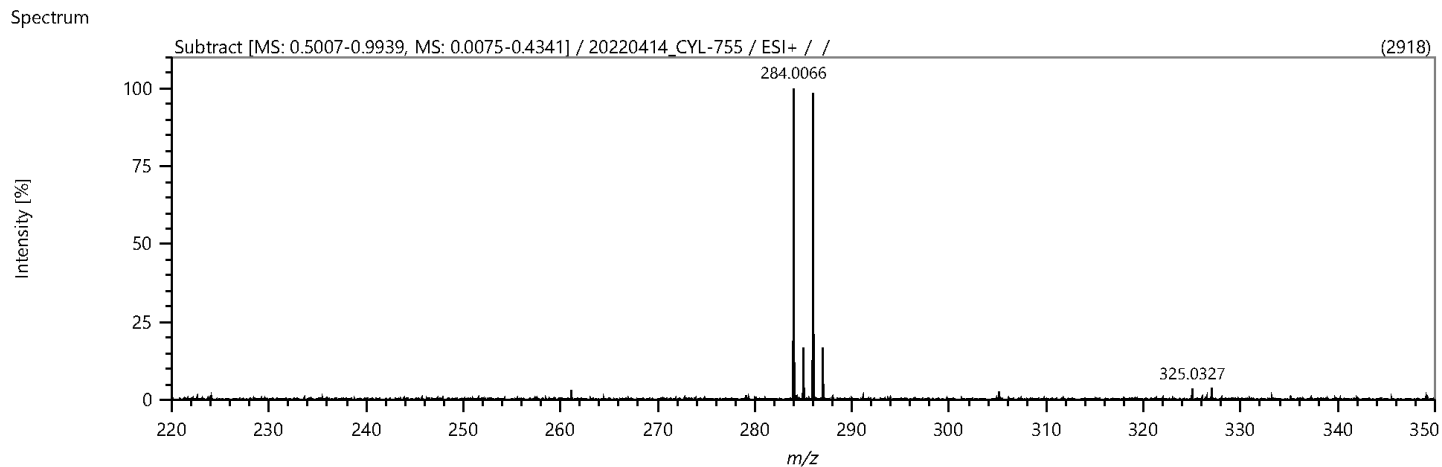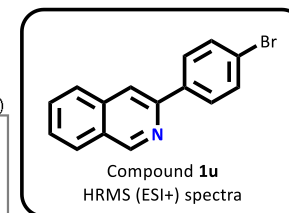

### Elemental Composition

#### Parameters

Tolerance:  $\pm 10.00$  ppm  
 Electron: Odd/Even  
 Charge: +1  
 DBE: -99.0 - 999.0

#### Elements Set 1:

| Symbol | C   | H    | N | Br |
|--------|-----|------|---|----|
| Min    | 0   | 0    | 1 | 1  |
| Max    | 400 | 1000 | 2 | 2  |

### Results

| Mass      | Formula                              | Calculated Mass | Mass Difference [mDa] | Mass Difference [ppm] | DBE  |
|-----------|--------------------------------------|-----------------|-----------------------|-----------------------|------|
| 284.00660 | C <sub>15</sub> H <sub>11</sub> N Br | 284.00694       | -0.34                 | -1.19                 | 10.5 |

## The high-resolution mass spectrum (ESI+) of compound 1v.

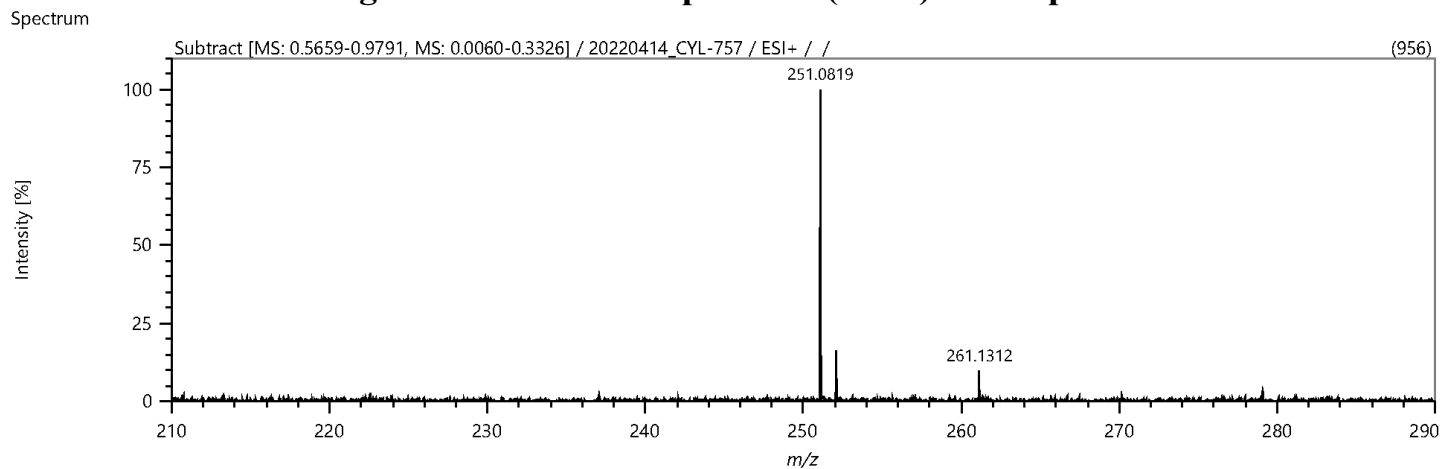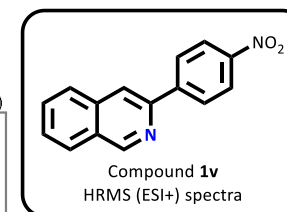

### Elemental Composition

Parameters

Tolerance:  $\pm 10.00$  ppm  
 Electron: Odd/Even  
 Charge: +1  
 DBE: -99.0 - 999.0

Elements Set 1:

| Symbol | C   | H    | N | O |
|--------|-----|------|---|---|
| Min    | 0   | 0    | 1 | 1 |
| Max    | 400 | 1000 | 2 | 2 |

### Results

| Mass      | Formula                                                       | Calculated Mass | Mass Difference [mDa] | Mass Difference [ppm] | DBE  |
|-----------|---------------------------------------------------------------|-----------------|-----------------------|-----------------------|------|
| 251.08186 | C <sub>15</sub> H <sub>11</sub> N <sub>2</sub> O <sub>2</sub> | 251.08150       | 0.35                  | 1.40                  | 11.5 |

## The high-resolution mass spectrum (ESI+) of compound 1w.

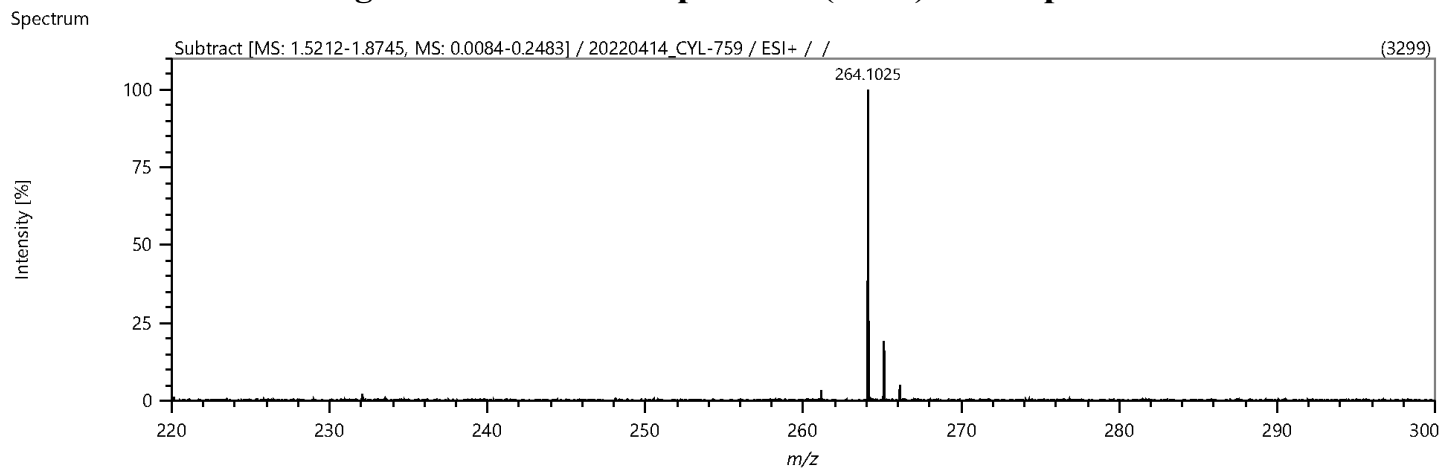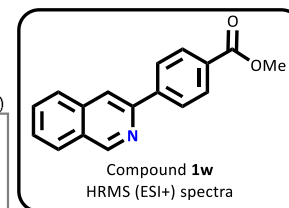

### Elemental Composition

#### Parameters

Tolerance:  $\pm 10.00$  ppm  
 Electron: Odd/Even  
 Charge: +1  
 DBE: -99.0 - 999.0

#### Elements Set 1:

| Symbol | C   | H    | N | O |
|--------|-----|------|---|---|
| Min    | 0   | 0    | 1 | 2 |
| Max    | 400 | 1000 | 2 | 2 |

### Results

| Mass      | Formula                                          | Calculated Mass | Mass Difference [mDa] | Mass Difference [ppm] | DBE  |
|-----------|--------------------------------------------------|-----------------|-----------------------|-----------------------|------|
| 264.10254 | C <sub>17</sub> H <sub>14</sub> N O <sub>2</sub> | 264.10191       | 0.64                  | 2.42                  | 11.5 |



## The high-resolution mass spectrum (ESI+) of compound 1x.

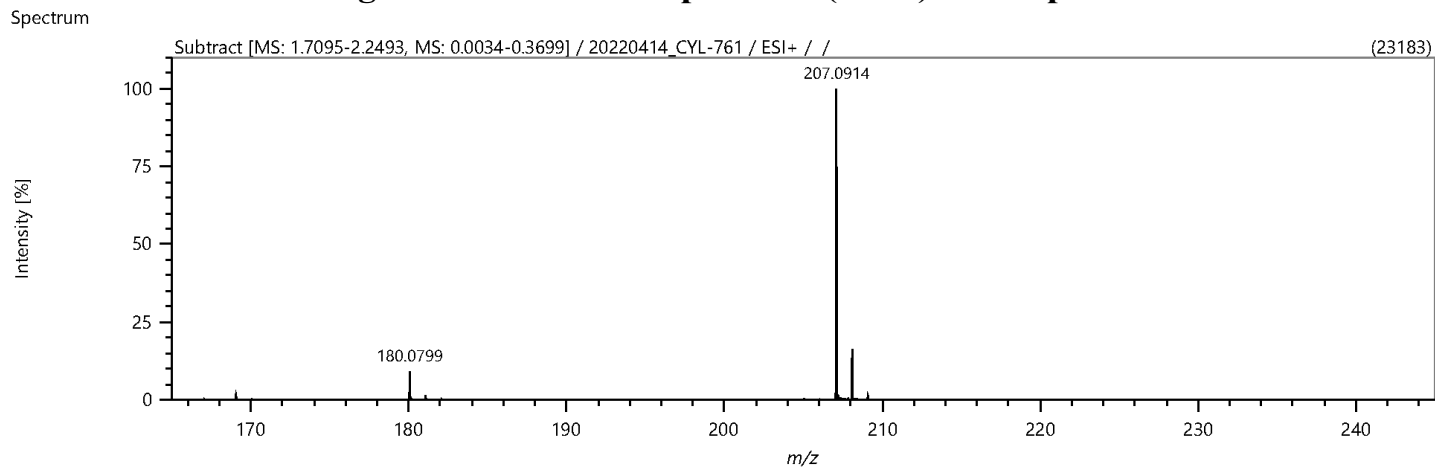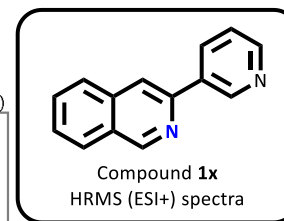

### Elemental Composition

#### Parameters

Tolerance:  $\pm 20.00$  ppm  
 Electron: Odd/Even  
 Charge: +1  
 DBE: -99.0 - 999.0

#### Elements Set 1:

| Symbol | C   | H    | N |
|--------|-----|------|---|
| Min    | 0   | 0    | 2 |
| Max    | 400 | 1000 | 2 |

### Results

| Mass      | Formula                                        | Calculated Mass | Mass Difference [mDa] | Mass Difference [ppm] | DBE  |
|-----------|------------------------------------------------|-----------------|-----------------------|-----------------------|------|
| 207.09140 | C <sub>14</sub> H <sub>11</sub> N <sub>2</sub> | 207.09167       | -0.28                 | -1.33                 | 10.5 |
